# Supplementary material for: Comparative genomics reveals key adaptive mechanisms in pathogen host-niche specialization
Source: Front Microbiol. 2025 Jun 6;16:1543610. doi: 10.3389/fmicb.2025.1543610 (PMC12180303; doi:10.3389/fmicb.2025.1543610)
Supplement: SUPPLEMENTARY TABLE S1 — Metadata summary of 4,366 bacterial genome sequences used in this study. [file Table_1.xlsx]

## Sheet: Sheet1
Taxa	Assemmbly id	Taxonomy	Stain	N50	Completeness(%)	Contaminations(%)	Label	Assembly level	Ftp
Cluster 1	GCA_000008865.2	Bacteria;Pseudomonadota;Gammaproteobacteria;Enterobacterales;Enterobacteriaceae;Escherichia;Escherichia coli	Escherichia coli O157:H7 str. Sakai	5498578	99.97	0.33	Human	Completed Genome	ftp://ftp.ncbi.nlm.nih.gov/genomes/all/GCA/000/008/865/GCA_000008865.2_ASM886v2
Cluster 1	GCA_000148365.1	Bacteria;Pseudomonadota;Gammaproteobacteria;Enterobacterales;Enterobacteriaceae;Escherichia;Escherichia coli	Escherichia coli ABU 83972	5131397	99.17	0.58	Human	Completed Genome	ftp://ftp.ncbi.nlm.nih.gov/genomes/all/GCA/000/148/365/GCA_000148365.1_ASM14836v1
Cluster 1	GCA_000155975.1	Bacteria;Pseudomonadota;Gammaproteobacteria;Enterobacterales;Enterobacteriaceae;Citrobacter;Citrobacter youngae	Citrobacter youngae ATCC 29220	497106	99.36	2.72	Human	Scaffold	ftp://ftp.ncbi.nlm.nih.gov/genomes/all/GCA/000/155/975/GCA_000155975.1_ASM15597v1
Cluster 1	GCA_000155995.1	Bacteria;Pseudomonadota;Gammaproteobacteria;Enterobacterales;Enterobacteriaceae;Enterobacter;Enterobacter cancerogenus	Enterobacter cancerogenus ATCC 35316	330219	98.98	0.86	Human	Scaffold	ftp://ftp.ncbi.nlm.nih.gov/genomes/all/GCA/000/155/995/GCA_000155995.1_ASM15599v1
Cluster 1	GCA_000157115.2	Bacteria;Pseudomonadota;Gammaproteobacteria;Enterobacterales;Enterobacteriaceae;Escherichia;Escherichia coli	Escherichia coli	213698	98.57	0.84	Human	Scaffold	ftp://ftp.ncbi.nlm.nih.gov/genomes/all/GCA/000/157/115/GCA_000157115.2_Escherichia_sp_3_2_53FAA_V2
Cluster 1	GCA_000158395.1	Bacteria;Pseudomonadota;Gammaproteobacteria;Enterobacterales;Enterobacteriaceae;Escherichia;Escherichia coli	Escherichia coli D9	107452	99.62	0.1	Human	Scaffold	ftp://ftp.ncbi.nlm.nih.gov/genomes/all/GCA/000/158/395/GCA_000158395.1_ASM15839v1
Cluster 1	GCA_000160755.1	Bacteria;Pseudomonadota;Gammaproteobacteria;Enterobacterales;Morganellaceae;Proteus;Proteus mirabilis	Proteus mirabilis ATCC 29906	130334	97.41	0.77	Human	Scaffold	ftp://ftp.ncbi.nlm.nih.gov/genomes/all/GCA/000/160/755/GCA_000160755.1_ASM16075v1
Cluster 1	GCA_000166455.2	Bacteria;Pseudomonadota;Gammaproteobacteria;Vibrionales;Vibrionaceae;Vibrio;Vibrio cholerae	Vibrio cholerae O1 str. 2010EL-1786	3031375	99.69	0.24	Human	Completed Genome	ftp://ftp.ncbi.nlm.nih.gov/genomes/all/GCA/000/166/455/GCA_000166455.2_ASM16645v2
Cluster 1	GCA_000166535.3	Bacteria;Pseudomonadota;Gammaproteobacteria;Enterobacterales;Enterobacteriaceae;Escherichia;Escherichia coli	Escherichia coli TW10598	4870513	99.97	0.84	Human	Chromosome	ftp://ftp.ncbi.nlm.nih.gov/genomes/all/GCA/000/166/535/GCA_000166535.3_ASM16653v3
Cluster 1	GCA_000186725.1	Bacteria;Pseudomonadota;Gammaproteobacteria;Enterobacterales;Yersiniaceae;Yersinia;Yersinia pestis	Yersinia pestis biovar Medievalis str. Harbin 35	4532063	98.19	0.86	Human	Completed Genome	ftp://ftp.ncbi.nlm.nih.gov/genomes/all/GCA/000/186/725/GCA_000186725.1_ASM18672v1
Cluster 1	GCA_000195005.1	Bacteria;Pseudomonadota;Gammaproteobacteria;Pasteurellales;Pasteurellaceae;Haemophilus;Haemophilus aegyptius	Haemophilus aegyptius ATCC 11116	91957	99.34	0	Human	Scaffold	ftp://ftp.ncbi.nlm.nih.gov/genomes/all/GCA/000/195/005/GCA_000195005.1_ASM19500v1
Cluster 1	GCA_000211395.2	Bacteria;Pseudomonadota;Gammaproteobacteria;Enterobacterales;Enterobacteriaceae;Escherichia;Escherichia coli	Escherichia coli AA86	2860197	98.93	0.25	Animal	Scaffold	ftp://ftp.ncbi.nlm.nih.gov/genomes/all/GCA/000/211/395/GCA_000211395.2_ASM21139v1
Cluster 1	GCA_000213995.1	Bacteria;Pseudomonadota;Gammaproteobacteria;Enterobacterales;Enterobacteriaceae;Enterobacter;Enterobacter hormaechei	Enterobacter hormaechei ATCC 49162	107933	99.57	0.06	Human	Scaffold	ftp://ftp.ncbi.nlm.nih.gov/genomes/all/GCA/000/213/995/GCA_000213995.1_ASM21399v1
Cluster 1	GCA_000214235.1	Bacteria;Pseudomonadota;Gammaproteobacteria;Enterobacterales;Yersiniaceae;Serratia;Serratia plymuthica	Serratia plymuthica AS9	5442880	99.25	0.56	Enironment	Completed Genome	ftp://ftp.ncbi.nlm.nih.gov/genomes/all/GCA/000/214/235/GCA_000214235.1_ASM21423v1
Cluster 1	GCA_000226815.3	Bacteria;Pseudomonadota;Gammaproteobacteria;Pasteurellales;Pasteurellaceae;Aggregatibacter;Aggregatibacter actinomycetemcomitans	Aggregatibacter actinomycetemcomitans serotype b str. SCC1398	76820	98.18	0.26	Human	Scaffold	ftp://ftp.ncbi.nlm.nih.gov/genomes/all/GCA/000/226/815/GCA_000226815.3_AaSCC1398v2.0
Cluster 1	GCA_000227625.1	Bacteria;Pseudomonadota;Gammaproteobacteria;Enterobacterales;Enterobacteriaceae;Escherichia;Escherichia coli	Escherichia coli O7:K1 str. CE10	5313531	99.97	0.04	Human	Completed Genome	ftp://ftp.ncbi.nlm.nih.gov/genomes/all/GCA/000/227/625/GCA_000227625.1_ASM22762v1
Cluster 1	GCA_000239255.1	Bacteria;Pseudomonadota;Gammaproteobacteria;Enterobacterales;Hafniaceae;Hafnia;Hafnia alvei	Hafnia alvei ATCC 51873	95454	99.59	0	Human	Scaffold	ftp://ftp.ncbi.nlm.nih.gov/genomes/all/GCA/000/239/255/GCA_000239255.1_ASM23925v1
Cluster 1	GCA_000243195.1	Bacteria;Pseudomonadota;Gammaproteobacteria;Enterobacterales;Enterobacteriaceae;Escherichia;Escherichia coli	Escherichia coli 4_1_47FAA	94986	99.35	0.12	Human	Scaffold	ftp://ftp.ncbi.nlm.nih.gov/genomes/all/GCA/000/243/195/GCA_000243195.1_Esch_coli_4_1_47FAA_V1
Cluster 1	GCA_000247855.1	Bacteria;Pseudomonadota;Gammaproteobacteria;Enterobacterales;Enterobacteriaceae;Klebsiella;Klebsiella oxytoca	Klebsiella oxytoca 10-5243	301576	99.7	0.4	Human	Scaffold	ftp://ftp.ncbi.nlm.nih.gov/genomes/all/GCA/000/247/855/GCA_000247855.1_Kleb_oxyt_10-5243_V1
Cluster 1	GCA_000259545.1	Bacteria;Pseudomonadota;Gammaproteobacteria;Pasteurellales;Pasteurellaceae;Pasteurella;Pasteurella multocida	Pasteurella multocida subsp. multocida str. 3480	2378127	99.26	0	Animal	Completed Genome	ftp://ftp.ncbi.nlm.nih.gov/genomes/all/GCA/000/259/545/GCA_000259545.1_ASM25954v1
Cluster 1	GCA_000281535.2	Bacteria;Pseudomonadota;Gammaproteobacteria;Enterobacterales;Enterobacteriaceae;Klebsiella;Klebsiella pneumoniae	Klebsiella pneumoniae subsp. pneumoniae KPNIH1	5394056	99.04	0.19	Human	Completed Genome	ftp://ftp.ncbi.nlm.nih.gov/genomes/all/GCA/000/281/535/GCA_000281535.2_ASM28153v2
Cluster 1	GCA_000297975.1	Bacteria;Pseudomonadota;Gammaproteobacteria;Aeromonadales;Aeromonadaceae;Aeromonas;Aeromonas veronii	Aeromonas veronii AER39	188051	99.06	0.56	Human	Scaffold	ftp://ftp.ncbi.nlm.nih.gov/genomes/all/GCA/000/297/975/GCA_000297975.1_Aero_vero_AER39_V1
Cluster 1	GCA_000297995.1	Bacteria;Pseudomonadota;Gammaproteobacteria;Aeromonadales;Aeromonadaceae;Aeromonas;Aeromonas veronii	Aeromonas veronii AER397	645709	99.38	0.18	Human	Scaffold	ftp://ftp.ncbi.nlm.nih.gov/genomes/all/GCA/000/297/995/GCA_000297995.1_Aero_vero_AER397_V1
Cluster 1	GCA_000298015.1	Bacteria;Pseudomonadota;Gammaproteobacteria;Aeromonadales;Aeromonadaceae;Aeromonas;Aeromonas veronii	Aeromonas veronii AMC34	219183	99.36	0.55	Human	Scaffold	ftp://ftp.ncbi.nlm.nih.gov/genomes/all/GCA/000/298/015/GCA_000298015.1_Aero_vero_AMC34_V1
Cluster 1	GCA_000298035.1	Bacteria;Pseudomonadota;Gammaproteobacteria;Aeromonadales;Aeromonadaceae;Aeromonas;Aeromonas veronii	Aeromonas veronii AMC35	351392	99.08	0.78	Human	Scaffold	ftp://ftp.ncbi.nlm.nih.gov/genomes/all/GCA/000/298/035/GCA_000298035.1_Aero_vero_AMC35_V1
Cluster 1	GCA_000298055.1	Bacteria;Pseudomonadota;Gammaproteobacteria;Aeromonadales;Aeromonadaceae;Aeromonas;Aeromonas dhakensis	Aeromonas dhakensis	268185	99.78	0.02	Human	Scaffold	ftp://ftp.ncbi.nlm.nih.gov/genomes/all/GCA/000/298/055/GCA_000298055.1_Aero_hydr_SSU_V1
Cluster 1	GCA_000298675.1	Bacteria;Pseudomonadota;Gammaproteobacteria;Pasteurellales;Pasteurellaceae;Pasteurella;Pasteurella multocida	Pasteurella multocida subsp. gallicida P1059	137372	99.55	0	Animal	Chromosome	ftp://ftp.ncbi.nlm.nih.gov/genomes/all/GCA/000/298/675/GCA_000298675.1_P1059v1
Cluster 1	GCA_000304955.2	Bacteria;Pseudomonadota;Gammaproteobacteria;Vibrionales;Vibrionaceae;Vibrio;Vibrio cholerae	Vibrio cholerae HC-41B1	109286	99.39	0.35	Human	Scaffold	ftp://ftp.ncbi.nlm.nih.gov/genomes/all/GCA/000/304/955/GCA_000304955.2_ASM30495v2
Cluster 1	GCA_000328885.1	Bacteria;Pseudomonadota;Gammaproteobacteria;Enterobacterales;Enterobacteriaceae;Enterobacter;Enterobacter hormaechei	Enterobacter hormaechei YT3	736199	99.32	0.25	Animal	Scaffold	ftp://ftp.ncbi.nlm.nih.gov/genomes/all/GCA/000/328/885/GCA_000328885.1_SOAPdenovo
Cluster 1	GCA_000349765.2	Bacteria;Pseudomonadota;Gammaproteobacteria;Pasteurellales;Pasteurellaceae;Mannheimia;Mannheimia haemolytica	Mannheimia haemolytica USDA-ARS-USMARC-183	2657957	99.81	0.46	Animal	Completed Genome	ftp://ftp.ncbi.nlm.nih.gov/genomes/all/GCA/000/349/765/GCA_000349765.2_ASM34976v2
Cluster 1	GCA_000350905.1	Bacteria;Pseudomonadota;Gammaproteobacteria;Enterobacterales;Enterobacteriaceae;Escherichia;Escherichia coli	Escherichia coli KTE178	301116	99.02	0.42	Human	Scaffold	ftp://ftp.ncbi.nlm.nih.gov/genomes/all/GCA/000/350/905/GCA_000350905.1_Esch_coli_KTE178_V1
Cluster 1	GCA_000350925.1	Bacteria;Pseudomonadota;Gammaproteobacteria;Enterobacterales;Enterobacteriaceae;Escherichia;Escherichia coli	Escherichia coli KTE181	167238	99.97	0.09	Human	Scaffold	ftp://ftp.ncbi.nlm.nih.gov/genomes/all/GCA/000/350/925/GCA_000350925.1_Esch_coli_KTE181_V1
Cluster 1	GCA_000351025.1	Bacteria;Pseudomonadota;Gammaproteobacteria;Enterobacterales;Enterobacteriaceae;Escherichia;Escherichia coli	Escherichia coli KTE193	237049	99.97	0.09	Human	Scaffold	ftp://ftp.ncbi.nlm.nih.gov/genomes/all/GCA/000/351/025/GCA_000351025.1_Esch_coli_KTE193_V1
Cluster 1	GCA_000351165.1	Bacteria;Pseudomonadota;Gammaproteobacteria;Enterobacterales;Enterobacteriaceae;Escherichia;Escherichia coli	Escherichia coli KTE212	313078	99.97	0.1	Human	Scaffold	ftp://ftp.ncbi.nlm.nih.gov/genomes/all/GCA/000/351/165/GCA_000351165.1_Esch_coli_KTE212_V1
Cluster 1	GCA_000351325.1	Bacteria;Pseudomonadota;Gammaproteobacteria;Enterobacterales;Enterobacteriaceae;Escherichia;Escherichia coli	Escherichia coli KTE233	181720	99.97	0.9	Human	Scaffold	ftp://ftp.ncbi.nlm.nih.gov/genomes/all/GCA/000/351/325/GCA_000351325.1_Esch_coli_KTE233_V1
Cluster 1	GCA_000351345.1	Bacteria;Pseudomonadota;Gammaproteobacteria;Enterobacterales;Enterobacteriaceae;Escherichia;Escherichia coli	Escherichia coli KTE234	126708	98.98	0.59	Human	Scaffold	ftp://ftp.ncbi.nlm.nih.gov/genomes/all/GCA/000/351/345/GCA_000351345.1_Esch_coli_KTE234_V1
Cluster 1	GCA_000351385.1	Bacteria;Pseudomonadota;Gammaproteobacteria;Enterobacterales;Enterobacteriaceae;Escherichia;Escherichia coli	Escherichia coli KTE236	264011	99.97	0.04	Human	Scaffold	ftp://ftp.ncbi.nlm.nih.gov/genomes/all/GCA/000/351/385/GCA_000351385.1_Esch_coli_KTE236_V1
Cluster 1	GCA_000351425.1	Bacteria;Pseudomonadota;Gammaproteobacteria;Enterobacterales;Enterobacteriaceae;Escherichia;Escherichia coli	Escherichia coli KTE47	305908	98.4	0.39	Human	Scaffold	ftp://ftp.ncbi.nlm.nih.gov/genomes/all/GCA/000/351/425/GCA_000351425.1_Esch_coli_KTE47_V1
Cluster 1	GCA_000351625.1	Bacteria;Pseudomonadota;Gammaproteobacteria;Enterobacterales;Enterobacteriaceae;Escherichia;Escherichia coli	Escherichia coli KTE66	347785	99.97	0.04	Human	Scaffold	ftp://ftp.ncbi.nlm.nih.gov/genomes/all/GCA/000/351/625/GCA_000351625.1_Esch_coli_KTE66_V1
Cluster 1	GCA_000351685.1	Bacteria;Pseudomonadota;Gammaproteobacteria;Enterobacterales;Enterobacteriaceae;Escherichia;Escherichia coli	Escherichia coli KTE75	200834	99.97	0.04	Human	Scaffold	ftp://ftp.ncbi.nlm.nih.gov/genomes/all/GCA/000/351/685/GCA_000351685.1_Esch_coli_KTE75_V1
Cluster 1	GCA_000351945.1	Bacteria;Pseudomonadota;Gammaproteobacteria;Enterobacterales;Enterobacteriaceae;Escherichia;Escherichia coli	Escherichia coli KTE143	210461	99.34	1	Human	Scaffold	ftp://ftp.ncbi.nlm.nih.gov/genomes/all/GCA/000/351/945/GCA_000351945.1_Esch_coli_KTE143_V1
Cluster 1	GCA_000352325.1	Bacteria;Pseudomonadota;Gammaproteobacteria;Enterobacterales;Enterobacteriaceae;Escherichia;Escherichia coli	Escherichia coli KTE50	276932	99.67	0.04	Human	Scaffold	ftp://ftp.ncbi.nlm.nih.gov/genomes/all/GCA/000/352/325/GCA_000352325.1_Esch_coli_KTE50_V1
Cluster 1	GCA_000352425.1	Bacteria;Pseudomonadota;Gammaproteobacteria;Enterobacterales;Enterobacteriaceae;Escherichia;Escherichia coli	Escherichia coli KTE78	312102	99.62	0.35	Human	Scaffold	ftp://ftp.ncbi.nlm.nih.gov/genomes/all/GCA/000/352/425/GCA_000352425.1_Esch_coli_KTE78_V1
Cluster 1	GCA_000352465.1	Bacteria;Pseudomonadota;Gammaproteobacteria;Enterobacterales;Enterobacteriaceae;Escherichia;Escherichia coli	Escherichia coli KTE84	188061	98.82	0.25	Human	Scaffold	ftp://ftp.ncbi.nlm.nih.gov/genomes/all/GCA/000/352/465/GCA_000352465.1_Esch_coli_KTE84_V1
Cluster 1	GCA_000352665.1	Bacteria;Pseudomonadota;Gammaproteobacteria;Enterobacterales;Enterobacteriaceae;Escherichia;Escherichia coli	Escherichia coli KTE144	307732	99.97	0.14	Human	Scaffold	ftp://ftp.ncbi.nlm.nih.gov/genomes/all/GCA/000/352/665/GCA_000352665.1_Esch_coli_KTE144_V1
Cluster 1	GCA_000352685.1	Bacteria;Pseudomonadota;Gammaproteobacteria;Enterobacterales;Enterobacteriaceae;Escherichia;Escherichia coli	Escherichia coli KTE146	209236	99.67	0.04	Human	Scaffold	ftp://ftp.ncbi.nlm.nih.gov/genomes/all/GCA/000/352/685/GCA_000352685.1_Esch_coli_KTE146_V1
Cluster 1	GCA_000352705.1	Bacteria;Pseudomonadota;Gammaproteobacteria;Enterobacterales;Enterobacteriaceae;Escherichia;Escherichia coli	Escherichia coli KTE147	283989	99.97	0.12	Human	Scaffold	ftp://ftp.ncbi.nlm.nih.gov/genomes/all/GCA/000/352/705/GCA_000352705.1_Esch_coli_KTE147_V1
Cluster 1	GCA_000352785.1	Bacteria;Pseudomonadota;Gammaproteobacteria;Enterobacterales;Enterobacteriaceae;Escherichia;Escherichia coli	Escherichia coli KTE192	280270	98.94	0.18	Human	Scaffold	ftp://ftp.ncbi.nlm.nih.gov/genomes/all/GCA/000/352/785/GCA_000352785.1_Esch_coli_KTE192_V1
Cluster 1	GCA_000352925.1	Bacteria;Pseudomonadota;Gammaproteobacteria;Enterobacterales;Enterobacteriaceae;Escherichia;Escherichia coli	Escherichia coli KTE196	194133	99.7	0.38	Human	Scaffold	ftp://ftp.ncbi.nlm.nih.gov/genomes/all/GCA/000/352/925/GCA_000352925.1_Esch_coli_KTE196_V1
Cluster 1	GCA_000367165.1	Bacteria;Pseudomonadota;Gammaproteobacteria;Enterobacterales;Enterobacteriaceae;Klebsiella;Klebsiella pneumoniae	Klebsiella pneumoniae subsp. pneumoniae 12-3578	136195	100	0.78	Human	Scaffold	ftp://ftp.ncbi.nlm.nih.gov/genomes/all/GCA/000/367/165/GCA_000367165.1_ASM36716v1
Cluster 1	GCA_000408105.1	Bacteria;Pseudomonadota;Gammaproteobacteria;Enterobacterales;Enterobacteriaceae;Escherichia;Escherichia coli	Escherichia coli KTE186	250549	97.41	1.17	Human	Scaffold	ftp://ftp.ncbi.nlm.nih.gov/genomes/all/GCA/000/408/105/GCA_000408105.1_Esch_coli_KTE186_V1
Cluster 1	GCA_000408245.1	Bacteria;Pseudomonadota;Gammaproteobacteria;Enterobacterales;Enterobacteriaceae;Escherichia;Escherichia coli	Escherichia coli KTE222	491232	99.59	0.1	Human	Scaffold	ftp://ftp.ncbi.nlm.nih.gov/genomes/all/GCA/000/408/245/GCA_000408245.1_Esch_coli_KTE222_V1
Cluster 1	GCA_000408585.1	Bacteria;Pseudomonadota;Gammaproteobacteria;Enterobacterales;Enterobacteriaceae;Escherichia;Escherichia coli	Escherichia coli KTE102	166268	99.97	0.36	Human	Scaffold	ftp://ftp.ncbi.nlm.nih.gov/genomes/all/GCA/000/408/585/GCA_000408585.1_Esch_coli_KTE102_V1
Cluster 1	GCA_000412335.2	Bacteria;Pseudomonadota;Gammaproteobacteria;Enterobacterales;Enterobacteriaceae;Cedecea;Cedecea davisae	Cedecea davisae DSM 4568	279459	100	0	Human	Scaffold	ftp://ftp.ncbi.nlm.nih.gov/genomes/all/GCA/000/412/335/GCA_000412335.2_ASM41233v2
Cluster 1	GCA_000413135.2	Bacteria;Pseudomonadota;Gammaproteobacteria;Pasteurellales;Pasteurellaceae;Pasteurella;Pasteurella multocida	Pasteurella multocida subsp. multocida P1062	1305602	99.55	0.23	Animal	Chromosome	ftp://ftp.ncbi.nlm.nih.gov/genomes/all/GCA/000/413/135/GCA_000413135.2_P1062v2
Cluster 1	GCA_000418595.1	Bacteria;Pseudomonadota;Gammaproteobacteria;Enterobacterales;Enterobacteriaceae;Escherichia;Escherichia coli	Escherichia coli MC6003	120868	99.67	0.47	Human	Scaffold	ftp://ftp.ncbi.nlm.nih.gov/genomes/all/GCA/000/418/595/GCA_000418595.1_E_coliMC6003-1.0
Cluster 1	GCA_000418815.1	Bacteria;Pseudomonadota;Gammaproteobacteria;Enterobacterales;Yersiniaceae;Serratia;Serratia marcescens	Serratia marcescens MC620	86897	99.88	0.19	Human	Scaffold	ftp://ftp.ncbi.nlm.nih.gov/genomes/all/GCA/000/418/815/GCA_000418815.1_S_marcescensMC620-1.0
Cluster 1	GCA_000430405.1	Bacteria;Pseudomonadota;Gammaproteobacteria;Vibrionales;Vibrionaceae;Vibrio;Vibrio parahaemolyticus	Vibrio parahaemolyticus O1:Kuk str. FDA_R31	3362228	98.73	1.02	Animal	Completed Genome	ftp://ftp.ncbi.nlm.nih.gov/genomes/all/GCA/000/430/405/GCA_000430405.1_ASM43040v1
Cluster 1	GCA_000430425.1	Bacteria;Pseudomonadota;Gammaproteobacteria;Vibrionales;Vibrionaceae;Vibrio;Vibrio parahaemolyticus	Vibrio parahaemolyticus O1:K33 str. CDC_K4557	3331580	98.5	1.36	Human	Completed Genome	ftp://ftp.ncbi.nlm.nih.gov/genomes/all/GCA/000/430/425/GCA_000430425.1_ASM43042v1
Cluster 1	GCA_000456365.1	Bacteria;Pseudomonadota;Gammaproteobacteria;Enterobacterales;Enterobacteriaceae;Escherichia;Escherichia coli	Escherichia coli HVH 25 (4-5851939)	137672	99.97	0.09	Human	Scaffold	ftp://ftp.ncbi.nlm.nih.gov/genomes/all/GCA/000/456/365/GCA_000456365.1_Esch_coli_HVH_25_4-5851939_V1
Cluster 1	GCA_000456745.1	Bacteria;Pseudomonadota;Gammaproteobacteria;Enterobacterales;Enterobacteriaceae;Escherichia;Escherichia coli	Escherichia coli HVH 46 (4-2758776)	260420	98.61	1.16	Human	Scaffold	ftp://ftp.ncbi.nlm.nih.gov/genomes/all/GCA/000/456/745/GCA_000456745.1_Esch_coli_HVH_46_4-2758776_V1
Cluster 1	GCA_000457125.1	Bacteria;Pseudomonadota;Gammaproteobacteria;Enterobacterales;Enterobacteriaceae;Escherichia;Escherichia coli	Escherichia coli HVH 79 (4-2512823)	224272	99.97	0.37	Human	Scaffold	ftp://ftp.ncbi.nlm.nih.gov/genomes/all/GCA/000/457/125/GCA_000457125.1_Esch_coli_HVH_79_4-2512823_V1
Cluster 1	GCA_000457635.1	Bacteria;Pseudomonadota;Gammaproteobacteria;Enterobacterales;Enterobacteriaceae;Escherichia;Escherichia coli	Escherichia coli HVH 115 (4-4465997)	138181	99.97	0.04	Human	Scaffold	ftp://ftp.ncbi.nlm.nih.gov/genomes/all/GCA/000/457/635/GCA_000457635.1_Esch_coli_HVH_115_4-4465997_V1
Cluster 1	GCA_000458915.1	Bacteria;Pseudomonadota;Gammaproteobacteria;Enterobacterales;Enterobacteriaceae;Escherichia;Escherichia coli	Escherichia coli HVH 193 (4-3331423)	279273	99.24	0.97	Human	Scaffold	ftp://ftp.ncbi.nlm.nih.gov/genomes/all/GCA/000/458/915/GCA_000458915.1_Esch_coli_HVH_193_4-3331423_V1
Cluster 1	GCA_000459555.1	Bacteria;Pseudomonadota;Gammaproteobacteria;Enterobacterales;Enterobacteriaceae;Escherichia;Escherichia coli	Escherichia coli KOEGE 3 (4a)	210092	99.97	0.04	Human	Scaffold	ftp://ftp.ncbi.nlm.nih.gov/genomes/all/GCA/000/459/555/GCA_000459555.1_Esch_coli_KOEGE_3_4a_V1
Cluster 1	GCA_000459575.1	Bacteria;Pseudomonadota;Gammaproteobacteria;Enterobacterales;Enterobacteriaceae;Escherichia;Escherichia coli	Escherichia coli KOEGE 7 (16a)	203613	99.97	0.17	Human	Scaffold	ftp://ftp.ncbi.nlm.nih.gov/genomes/all/GCA/000/459/575/GCA_000459575.1_Esch_coli_KOEGE_7_16a_V1
Cluster 1	GCA_000459855.1	Bacteria;Pseudomonadota;Gammaproteobacteria;Enterobacterales;Enterobacteriaceae;Escherichia;Escherichia coli	Escherichia coli KOEGE 71 (186a)	851263	99.67	0.21	Human	Scaffold	ftp://ftp.ncbi.nlm.nih.gov/genomes/all/GCA/000/459/855/GCA_000459855.1_Esch_coli_KOEGE_71_186a_V1
Cluster 1	GCA_000459915.1	Bacteria;Pseudomonadota;Gammaproteobacteria;Enterobacterales;Enterobacteriaceae;Escherichia;Escherichia coli	Escherichia coli KOEGE 118 (317a)	360294	99.59	0.2	Human	Scaffold	ftp://ftp.ncbi.nlm.nih.gov/genomes/all/GCA/000/459/915/GCA_000459915.1_Esch_coli_KOEGE_118_317a_V1
Cluster 1	GCA_000460035.1	Bacteria;Pseudomonadota;Gammaproteobacteria;Enterobacterales;Enterobacteriaceae;Escherichia;Escherichia coli	Escherichia coli UMEA 3052-1	132829	99.62	0.53	Human	Scaffold	ftp://ftp.ncbi.nlm.nih.gov/genomes/all/GCA/000/460/035/GCA_000460035.1_Esch_coli_UMEA_3052-1_V1
Cluster 1	GCA_000460255.1	Bacteria;Pseudomonadota;Gammaproteobacteria;Enterobacterales;Enterobacteriaceae;Escherichia;Escherichia coli	Escherichia coli UMEA 3124-1	230345	99.67	0.04	Human	Scaffold	ftp://ftp.ncbi.nlm.nih.gov/genomes/all/GCA/000/460/255/GCA_000460255.1_Esch_coli_UMEA_3124-1_V1
Cluster 1	GCA_000460735.1	Bacteria;Pseudomonadota;Gammaproteobacteria;Enterobacterales;Enterobacteriaceae;Escherichia;Escherichia coli	Escherichia coli UMEA 3200-1	215611	99.97	0.04	Human	Scaffold	ftp://ftp.ncbi.nlm.nih.gov/genomes/all/GCA/000/460/735/GCA_000460735.1_Esch_coli_UMEA_3200-1_V1
Cluster 1	GCA_000461135.1	Bacteria;Pseudomonadota;Gammaproteobacteria;Enterobacterales;Enterobacteriaceae;Escherichia;Escherichia coli	Escherichia coli UMEA 3292-1	164440	99.59	0.14	Human	Scaffold	ftp://ftp.ncbi.nlm.nih.gov/genomes/all/GCA/000/461/135/GCA_000461135.1_Esch_coli_UMEA_3292-1_V1
Cluster 1	GCA_000461675.1	Bacteria;Pseudomonadota;Gammaproteobacteria;Enterobacterales;Enterobacteriaceae;Escherichia;Escherichia coli	Escherichia coli UMEA 3718-1	213634	99.97	0.04	Human	Scaffold	ftp://ftp.ncbi.nlm.nih.gov/genomes/all/GCA/000/461/675/GCA_000461675.1_Esch_coli_UMEA_3718-1_V1
Cluster 1	GCA_000463095.2	Bacteria;Pseudomonadota;Gammaproteobacteria;Enterobacterales;Enterobacteriaceae;Cronobacter;Cronobacter sakazakii	Cronobacter sakazakii NCIMB 8272	145413	99.69	0.32	Human	Scaffold	ftp://ftp.ncbi.nlm.nih.gov/genomes/all/GCA/000/463/095/GCA_000463095.2_CroSakNCIMB8271_1.0
Cluster 1	GCA_000464515.2	Bacteria;Pseudomonadota;Gammaproteobacteria;Aeromonadales;Aeromonadaceae;Aeromonas;Aeromonas veronii	Aeromonas veronii Hm21	4710355	99.41	0.7	Animal	Completed Genome	ftp://ftp.ncbi.nlm.nih.gov/genomes/all/GCA/000/464/515/GCA_000464515.2_ASM46451v2
Cluster 1	GCA_000467655.2	Bacteria;Pseudomonadota;Gammaproteobacteria;Enterobacterales;Enterobacteriaceae;Enterobacter;Enterobacter roggenkampii	Enterobacter roggenkampii EC_38VIM1	262093	99.6	1.29	Human	Scaffold	ftp://ftp.ncbi.nlm.nih.gov/genomes/all/GCA/000/467/655/GCA_000467655.2_EC_38VIM1
Cluster 1	GCA_000475055.1	Bacteria;Pseudomonadota;Gammaproteobacteria;Enterobacterales;Erwiniaceae;Pantoea;Pantoea agglomerans	Pantoea agglomerans Tx10	586961	98.33	0.62	Human	Scaffold	ftp://ftp.ncbi.nlm.nih.gov/genomes/all/GCA/000/475/055/GCA_000475055.1_ASM47505v1
Cluster 1	GCA_000485635.1	Bacteria;Pseudomonadota;Gammaproteobacteria;Enterobacterales;Enterobacteriaceae;Escherichia;Escherichia coli	Escherichia coli 113290	56295	99.97	0.04	Human	Scaffold	ftp://ftp.ncbi.nlm.nih.gov/genomes/all/GCA/000/485/635/GCA_000485635.1_ASM48563v1
Cluster 1	GCA_000488355.1	Bacteria;Pseudomonadota;Gammaproteobacteria;Enterobacterales;Enterobacteriaceae;Escherichia;Escherichia coli	Escherichia coli 907672	123690	99.56	0.2	Human	Scaffold	ftp://ftp.ncbi.nlm.nih.gov/genomes/all/GCA/000/488/355/GCA_000488355.1_ASM48835v1
Cluster 1	GCA_000488635.1	Bacteria;Pseudomonadota;Gammaproteobacteria;Enterobacterales;Enterobacteriaceae;Escherichia;Escherichia coli	Escherichia coli 908573	87595	99.56	0.28	Human	Scaffold	ftp://ftp.ncbi.nlm.nih.gov/genomes/all/GCA/000/488/635/GCA_000488635.1_ASM48863v1
Cluster 1	GCA_000500105.2	Bacteria;Pseudomonadota;Gammaproteobacteria;Vibrionales;Vibrionaceae;Vibrio;Vibrio parahaemolyticus	Vibrio parahaemolyticus 10296	56029	99.17	0.74	Human	Scaffold	ftp://ftp.ncbi.nlm.nih.gov/genomes/all/GCA/000/500/105/GCA_000500105.2_vp10296
Cluster 1	GCA_000507685.1	Bacteria;Pseudomonadota;Gammaproteobacteria;Enterobacterales;Enterobacteriaceae;Escherichia;Escherichia coli	Escherichia coli UMEA 3489-1	467153	99.24	0.51	Human	Scaffold	ftp://ftp.ncbi.nlm.nih.gov/genomes/all/GCA/000/507/685/GCA_000507685.1_Esch_coli_UMEA_3489-1_V1
Cluster 1	GCA_000510605.2	Bacteria;Pseudomonadota;Gammaproteobacteria;Vibrionales;Vibrionaceae;Vibrio;Vibrio parahaemolyticus	Vibrio parahaemolyticus 970107	64091	98.51	2.25	Environment	Scaffold	ftp://ftp.ncbi.nlm.nih.gov/genomes/all/GCA/000/510/605/GCA_000510605.2_vp970107
Cluster 1	GCA_000516875.2	Bacteria;Pseudomonadota;Gammaproteobacteria;Vibrionales;Vibrionaceae;Vibrio;Vibrio parahaemolyticus	Vibrio parahaemolyticus B-265	260673	99.5	1.18	Human	Scaffold	ftp://ftp.ncbi.nlm.nih.gov/genomes/all/GCA/000/516/875/GCA_000516875.2_vpB265
Cluster 1	GCA_000519385.2	Bacteria;Pseudomonadota;Gammaproteobacteria;Vibrionales;Vibrionaceae;Vibrio;Vibrio parahaemolyticus	Vibrio parahaemolyticus 50	285062	99.24	0.84	Human	Scaffold	ftp://ftp.ncbi.nlm.nih.gov/genomes/all/GCA/000/519/385/GCA_000519385.2_vp50
Cluster 1	GCA_000520035.1	Bacteria;Pseudomonadota;Gammaproteobacteria;Enterobacterales;Enterobacteriaceae;Escherichia;Escherichia coli	Escherichia coli O145:H28 str. RM13514	5585613	99.97	0.46	Human	Completed Genome	ftp://ftp.ncbi.nlm.nih.gov/genomes/all/GCA/000/520/035/GCA_000520035.1_ASM52003v1
Cluster 1	GCA_000521905.1	Bacteria;Pseudomonadota;Gammaproteobacteria;Enterobacterales;Yersiniaceae;Serratia;Serratia marcescens	Serratia marcescens BIDMC 50	685952	99.81	0	Human	Scaffold	ftp://ftp.ncbi.nlm.nih.gov/genomes/all/GCA/000/521/905/GCA_000521905.1_Serr_marc_BIDMC_50_V1
Cluster 1	GCA_000521925.1	Bacteria;Pseudomonadota;Gammaproteobacteria;Enterobacterales;Yersiniaceae;Serratia;Serratia marcescens	Serratia marcescens BIDMC 44	940008	99.8	0	Human	Scaffold	ftp://ftp.ncbi.nlm.nih.gov/genomes/all/GCA/000/521/925/GCA_000521925.1_Serr_marc_BIDMC_44_V1
Cluster 1	GCA_000522085.1	Bacteria;Pseudomonadota;Gammaproteobacteria;Enterobacterales;Enterobacteriaceae;Escherichia;Escherichia coli	Escherichia coli BIDMC 43b	522898	99.37	0.4	Human	Scaffold	ftp://ftp.ncbi.nlm.nih.gov/genomes/all/GCA/000/522/085/GCA_000522085.1_Esch_coli_BIDMC_43b_V1
Cluster 1	GCA_000534035.1	Bacteria;Pseudomonadota;Gammaproteobacteria;Enterobacterales;Enterobacteriaceae;Enterobacter;Enterobacter hormaechei	Enterobacter hormaechei subsp. hoffmannii UCI 50	590610	99.97	0.52	Human	Scaffold	ftp://ftp.ncbi.nlm.nih.gov/genomes/all/GCA/000/534/035/GCA_000534035.1_Ente_cloa_UCI_50_V1
Cluster 1	GCA_000534055.1	Bacteria;Pseudomonadota;Gammaproteobacteria;Enterobacterales;Enterobacteriaceae;Enterobacter;Enterobacter asburiae	Enterobacter asburiae	909010	99.97	0.59	Human	Scaffold	ftp://ftp.ncbi.nlm.nih.gov/genomes/all/GCA/000/534/055/GCA_000534055.1_Ente_cloa_UCI_49_V1
Cluster 1	GCA_000534075.1	Bacteria;Pseudomonadota;Gammaproteobacteria;Enterobacterales;Enterobacteriaceae;Klebsiella;Klebsiella aerogenes	Klebsiella aerogenes UCI 48	597938	96.06	4.39	Human	Scaffold	ftp://ftp.ncbi.nlm.nih.gov/genomes/all/GCA/000/534/075/GCA_000534075.1_Ente_aero_UCI_48_V1
Cluster 1	GCA_000534135.1	Bacteria;Pseudomonadota;Gammaproteobacteria;Enterobacterales;Enterobacteriaceae;Klebsiella;Klebsiella aerogenes	Klebsiella aerogenes UCI 45	715110	99.7	0.95	Human	Scaffold	ftp://ftp.ncbi.nlm.nih.gov/genomes/all/GCA/000/534/135/GCA_000534135.1_Ente_aero_UCI_45_V1
Cluster 1	GCA_000534155.1	Bacteria;Pseudomonadota;Gammaproteobacteria;Enterobacterales;Enterobacteriaceae;Enterobacter;Enterobacter roggenkampii	Enterobacter roggenkampii UCI 39	1337150	99.58	0.48	Human	Scaffold	ftp://ftp.ncbi.nlm.nih.gov/genomes/all/GCA/000/534/155/GCA_000534155.1_Ente_cloa_UCI_39_V1
Cluster 1	GCA_000534175.1	Bacteria;Pseudomonadota;Gammaproteobacteria;Enterobacterales;Enterobacteriaceae;Enterobacter;Enterobacter hormaechei	Enterobacter hormaechei	590124	99.82	0.24	Human	Scaffold	ftp://ftp.ncbi.nlm.nih.gov/genomes/all/GCA/000/534/175/GCA_000534175.1_Ente_cloa_UCI_36_V1
Cluster 1	GCA_000534215.1	Bacteria;Pseudomonadota;Gammaproteobacteria;Enterobacterales;Enterobacteriaceae;Enterobacter;Enterobacter hormaechei	Enterobacter hormaechei	752446	99.51	0.34	Human	Scaffold	ftp://ftp.ncbi.nlm.nih.gov/genomes/all/GCA/000/534/215/GCA_000534215.1_Ente_cloa_UCI_30_V1
Cluster 1	GCA_000534275.1	Bacteria;Pseudomonadota;Gammaproteobacteria;Enterobacterales;Enterobacteriaceae;Enterobacter;Enterobacter kobei	Enterobacter kobei	3280190	99.11	0.3	Human	Scaffold	ftp://ftp.ncbi.nlm.nih.gov/genomes/all/GCA/000/534/275/GCA_000534275.1_Ente_cloa_UCI_24_V1
Cluster 1	GCA_000633695.1	Bacteria;Pseudomonadota;Gammaproteobacteria;Enterobacterales;Yersiniaceae;Serratia;Serratia marcescens	Serratia marcescens BIDMC 81	253459	99.81	0	Human	Scaffold	ftp://ftp.ncbi.nlm.nih.gov/genomes/all/GCA/000/633/695/GCA_000633695.1_Serr_marc_BIDMC_81_V1
Cluster 1	GCA_000633715.1	Bacteria;Pseudomonadota;Gammaproteobacteria;Enterobacterales;Yersiniaceae;Serratia;Serratia marcescens	Serratia marcescens BIDMC 80	394707	99.81	0	Human	Scaffold	ftp://ftp.ncbi.nlm.nih.gov/genomes/all/GCA/000/633/715/GCA_000633715.1_Serr_marc_BIDMC_80_V1
Cluster 1	GCA_000692115.1	Bacteria;Pseudomonadota;Gammaproteobacteria;Enterobacterales;Enterobacteriaceae;Citrobacter;Citrobacter freundii	Citrobacter freundii MGH 56	458280	99.4	1.28	Human	Scaffold	ftp://ftp.ncbi.nlm.nih.gov/genomes/all/GCA/000/692/115/GCA_000692115.1_Citr_freu_MGH_56_V1
Cluster 1	GCA_000692155.1	Bacteria;Pseudomonadota;Gammaproteobacteria;Enterobacterales;Enterobacteriaceae;Klebsiella;Klebsiella aerogenes	Klebsiella aerogenes MGH 61	215670	99.7	0.99	Human	Scaffold	ftp://ftp.ncbi.nlm.nih.gov/genomes/all/GCA/000/692/155/GCA_000692155.1_Ente_aero_MGH_61_V1
Cluster 1	GCA_000692255.1	Bacteria;Pseudomonadota;Gammaproteobacteria;Enterobacterales;Enterobacteriaceae;Enterobacter;Enterobacter kobei	Enterobacter kobei	1318673	95.79	0.27	Human	Scaffold	ftp://ftp.ncbi.nlm.nih.gov/genomes/all/GCA/000/692/255/GCA_000692255.1_Ente_cloa_BIDMC_67_V1
Cluster 1	GCA_000692275.1	Bacteria;Pseudomonadota;Gammaproteobacteria;Enterobacterales;Enterobacteriaceae;Enterobacter;Enterobacter cloacae	Enterobacter cloacae BWH 43	291825	99.96	1.44	Human	Scaffold	ftp://ftp.ncbi.nlm.nih.gov/genomes/all/GCA/000/692/275/GCA_000692275.1_Ente_cloa_BWH_43_V1
Cluster 1	GCA_000692295.1	Bacteria;Pseudomonadota;Gammaproteobacteria;Enterobacterales;Enterobacteriaceae;Enterobacter;Enterobacter roggenkampii	Enterobacter roggenkampii CHS 79	436377	99.17	1.05	Human	Scaffold	ftp://ftp.ncbi.nlm.nih.gov/genomes/all/GCA/000/692/295/GCA_000692295.1_Ente_cloa_CHS_79_V1
Cluster 1	GCA_000692315.1	Bacteria;Pseudomonadota;Gammaproteobacteria;Enterobacterales;Enterobacteriaceae;Enterobacter;Enterobacter hormaechei	Enterobacter hormaechei	357496	99.49	1.03	Human	Scaffold	ftp://ftp.ncbi.nlm.nih.gov/genomes/all/GCA/000/692/315/GCA_000692315.1_Ente_cloa_MGH_53_V1
Cluster 1	GCA_000692335.1	Bacteria;Pseudomonadota;Gammaproteobacteria;Enterobacterales;Enterobacteriaceae;Enterobacter;Enterobacter roggenkampii	Enterobacter roggenkampii MGH 54	566827	99.39	0.31	Human	Scaffold	ftp://ftp.ncbi.nlm.nih.gov/genomes/all/GCA/000/692/335/GCA_000692335.1_Ente_cloa_MGH_54_V1
Cluster 1	GCA_000692835.1	Bacteria;Pseudomonadota;Gammaproteobacteria;Enterobacterales;Enterobacteriaceae;Escherichia;Escherichia coli	Escherichia coli UCI 57	575594	99.97	0.16	Human	Scaffold	ftp://ftp.ncbi.nlm.nih.gov/genomes/all/GCA/000/692/835/GCA_000692835.1_Esch_coli_UCI_57_V1
Cluster 1	GCA_000694955.1	Bacteria;Pseudomonadota;Gammaproteobacteria;Enterobacterales;Enterobacteriaceae;Enterobacter;Enterobacter hormaechei	Enterobacter hormaechei subsp. hoffmannii	258712	99.27	0.19	Human	Scaffold	ftp://ftp.ncbi.nlm.nih.gov/genomes/all/GCA/000/694/955/GCA_000694955.1_Lell_amni_CHS_78_V1
Cluster 1	GCA_000698365.1	Bacteria;Pseudomonadota;Gammaproteobacteria;Pasteurellales;Pasteurellaceae;Haemophilus;Haemophilus influenzae	Haemophilus influenzae CGSHiCZ412602	1811802	99.31	0.02	Human	Completed Genome	ftp://ftp.ncbi.nlm.nih.gov/genomes/all/GCA/000/698/365/GCA_000698365.1_ASM69836v1
Cluster 1	GCA_000731125.1	Bacteria;Pseudomonadota;Gammaproteobacteria;Enterobacterales;Erwiniaceae;Pantoea;Pantoea agglomerans	Pantoea agglomerans	3393498	98.05	0.79	Environment	Scaffold	ftp://ftp.ncbi.nlm.nih.gov/genomes/all/GCA/000/731/125/GCA_000731125.1_ASM73112v1
Cluster 1	GCA_000731735.1	Bacteria;Pseudomonadota;Gammaproteobacteria;Pasteurellales;Pasteurellaceae;Pasteurella;Pasteurella multocida	Pasteurella multocida	104934	99.3	0.23	Animal	Scaffold	ftp://ftp.ncbi.nlm.nih.gov/genomes/all/GCA/000/731/735/GCA_000731735.1_ASM73173v1
Cluster 1	GCA_000732995.1	Bacteria;Pseudomonadota;Gammaproteobacteria;Vibrionales;Vibrionaceae;Vibrio;Vibrio parahaemolyticus	Vibrio parahaemolyticus	215659	98.73	1.29	Environment	Scaffold	ftp://ftp.ncbi.nlm.nih.gov/genomes/all/GCA/000/732/995/GCA_000732995.1_ASM73299v1
Cluster 1	GCA_000743785.2	Bacteria;Pseudomonadota;Gammaproteobacteria;Enterobacterales;Erwiniaceae;Pantoea;Pantoea agglomerans	Pantoea agglomerans	2570317	98.65	0.3	Enironment	Scaffold	ftp://ftp.ncbi.nlm.nih.gov/genomes/all/GCA/000/743/785/GCA_000743785.2_ASM74378v2
Cluster 1	GCA_000743955.1	Bacteria;Pseudomonadota;Gammaproteobacteria;Enterobacterales;Enterobacteriaceae;Shigella;Shigella flexneri	Shigella flexneri 2003036	4595814	99.7	0.29	Human	Completed Genome	ftp://ftp.ncbi.nlm.nih.gov/genomes/all/GCA/000/743/955/GCA_000743955.1_ASM74395v1
Cluster 1	GCA_000752575.1	Bacteria;Pseudomonadota;Gammaproteobacteria;Enterobacterales;Enterobacteriaceae;Escherichia;Escherichia coli	Escherichia coli	53921	99.32	0.54	Human	Scaffold	ftp://ftp.ncbi.nlm.nih.gov/genomes/all/GCA/000/752/575/GCA_000752575.1_FHI81
Cluster 1	GCA_000752815.1	Bacteria;Pseudomonadota;Gammaproteobacteria;Enterobacterales;Enterobacteriaceae;Escherichia;Escherichia coli	Escherichia coli	88945	99.93	0.45	Animal	Scaffold	ftp://ftp.ncbi.nlm.nih.gov/genomes/all/GCA/000/752/815/GCA_000752815.1_FHI37
Cluster 1	GCA_000752895.1	Bacteria;Pseudomonadota;Gammaproteobacteria;Enterobacterales;Enterobacteriaceae;Escherichia;Escherichia coli	Escherichia coli	87830	99.97	0.84	Human	Scaffold	ftp://ftp.ncbi.nlm.nih.gov/genomes/all/GCA/000/752/895/GCA_000752895.1_FHI101
Cluster 1	GCA_000753035.1	Bacteria;Pseudomonadota;Gammaproteobacteria;Enterobacterales;Enterobacteriaceae;Escherichia;Escherichia coli	Escherichia coli	267761	98.89	0.3	Animal	Scaffold	ftp://ftp.ncbi.nlm.nih.gov/genomes/all/GCA/000/753/035/GCA_000753035.1_FHI38
Cluster 1	GCA_000753135.1	Bacteria;Pseudomonadota;Gammaproteobacteria;Enterobacterales;Enterobacteriaceae;Escherichia;Escherichia coli	Escherichia coli	78732	99.93	0.14	Human	Scaffold	ftp://ftp.ncbi.nlm.nih.gov/genomes/all/GCA/000/753/135/GCA_000753135.1_FHI64
Cluster 1	GCA_000753535.1	Bacteria;Pseudomonadota;Gammaproteobacteria;Enterobacterales;Enterobacteriaceae;Escherichia;Escherichia coli	Escherichia coli	142172	100	0.04	Human	Scaffold	ftp://ftp.ncbi.nlm.nih.gov/genomes/all/GCA/000/753/535/GCA_000753535.1_FHI54
Cluster 1	GCA_000754805.1	Bacteria;Pseudomonadota;Gammaproteobacteria;Enterobacterales;Yersiniaceae;Yersinia;Yersinia frederiksenii	Yersinia frederiksenii ATCC 33641	888967	99.82	0.86	Environment	Scaffold	ftp://ftp.ncbi.nlm.nih.gov/genomes/all/GCA/000/754/805/GCA_000754805.1_YFB
Cluster 1	GCA_000755055.1	Bacteria;Pseudomonadota;Gammaproteobacteria;Enterobacterales;Yersiniaceae;Yersinia;Yersinia enterocolitica	Yersinia enterocolitica	942248	97.08	1.04	Human	Scaffold	ftp://ftp.ncbi.nlm.nih.gov/genomes/all/GCA/000/755/055/GCA_000755055.1_YEG_1
Cluster 1	GCA_000755545.1	Bacteria;Pseudomonadota;Gammaproteobacteria;Enterobacterales;Enterobacteriaceae;Klebsiella;Klebsiella aerogenes	Klebsiella aerogenes	1360567	95.86	1.92	Human	Scaffold	ftp://ftp.ncbi.nlm.nih.gov/genomes/all/GCA/000/755/545/GCA_000755545.1_ASM75554v1
Cluster 1	GCA_000767075.1	Bacteria;Pseudomonadota;Gammaproteobacteria;Pasteurellales;Pasteurellaceae;Haemophilus;Haemophilus influenzae	Haemophilus influenzae	1850897	99.65	0.02	Human	Completed Genome	ftp://ftp.ncbi.nlm.nih.gov/genomes/all/GCA/000/767/075/GCA_000767075.1_ASM76707v1
Cluster 1	GCA_000778785.1	Bacteria;Pseudomonadota;Gammaproteobacteria;Enterobacterales;Enterobacteriaceae;Escherichia;Escherichia coli	Escherichia coli	154490	99.97	0.04	Human	Scaffold	ftp://ftp.ncbi.nlm.nih.gov/genomes/all/GCA/000/778/785/GCA_000778785.1_ASM77878v1
Cluster 1	GCA_000779295.1	Bacteria;Pseudomonadota;Gammaproteobacteria;Enterobacterales;Enterobacteriaceae;Escherichia;Escherichia coli	Escherichia coli	154652	99.22	0.24	Human	Scaffold	ftp://ftp.ncbi.nlm.nih.gov/genomes/all/GCA/000/779/295/GCA_000779295.1_ASM77929v1
Cluster 1	GCA_000779815.1	Bacteria;Pseudomonadota;Gammaproteobacteria;Enterobacterales;Enterobacteriaceae;Escherichia;Escherichia coli	Escherichia coli	123448	99.05	0.37	Human	Scaffold	ftp://ftp.ncbi.nlm.nih.gov/genomes/all/GCA/000/779/815/GCA_000779815.1_ASM77981v1
Cluster 1	GCA_000781195.1	Bacteria;Pseudomonadota;Gammaproteobacteria;Enterobacterales;Enterobacteriaceae;Escherichia;Escherichia coli	Escherichia coli	68488	97.17	0.58	Human	Scaffold	ftp://ftp.ncbi.nlm.nih.gov/genomes/all/GCA/000/781/195/GCA_000781195.1_ASM78119v1
Cluster 1	GCA_000783755.2	Bacteria;Pseudomonadota;Gammaproteobacteria;Enterobacterales;Enterobacteriaceae;Citrobacter;Citrobacter freundii	Citrobacter freundii	5064681	100	1.85	Human	Completed Genome	ftp://ftp.ncbi.nlm.nih.gov/genomes/all/GCA/000/783/755/GCA_000783755.2_ASM78375v2
Cluster 1	GCA_000783775.2	Bacteria;Pseudomonadota;Gammaproteobacteria;Aeromonadales;Aeromonadaceae;Aeromonas;Aeromonas caviae	Aeromonas caviae	4518310	100	1.2	Human	Completed Genome	ftp://ftp.ncbi.nlm.nih.gov/genomes/all/GCA/000/783/775/GCA_000783775.2_ASM78377v2
Cluster 1	GCA_000783915.2	Bacteria;Pseudomonadota;Gammaproteobacteria;Enterobacterales;Yersiniaceae;Serratia;Serratia marcescens	Serratia marcescens	5248423	99.81	0.11	Human	Completed Genome	ftp://ftp.ncbi.nlm.nih.gov/genomes/all/GCA/000/783/915/GCA_000783915.2_ASM78391v2
Cluster 1	GCA_000788495.1	Bacteria;Pseudomonadota;Gammaproteobacteria;Vibrionales;Vibrionaceae;Vibrio;Vibrio cholerae	Vibrio cholerae	73777	99.49	0.19	Environment	Scaffold	ftp://ftp.ncbi.nlm.nih.gov/genomes/all/GCA/000/788/495/GCA_000788495.1_ASM78849v1
Cluster 1	GCA_000788515.1	Bacteria;Pseudomonadota;Gammaproteobacteria;Vibrionales;Vibrionaceae;Vibrio;Vibrio cholerae	Vibrio cholerae	61945	99.93	0.03	Environment	Scaffold	ftp://ftp.ncbi.nlm.nih.gov/genomes/all/GCA/000/788/515/GCA_000788515.1_ASM78851v1
Cluster 1	GCA_000788675.1	Bacteria;Pseudomonadota;Gammaproteobacteria;Vibrionales;Vibrionaceae;Vibrio;Vibrio cholerae	Vibrio cholerae	74748	99.83	0.1	Environment	Scaffold	ftp://ftp.ncbi.nlm.nih.gov/genomes/all/GCA/000/788/675/GCA_000788675.1_ASM78867v1
Cluster 1	GCA_000788755.1	Bacteria;Pseudomonadota;Gammaproteobacteria;Vibrionales;Vibrionaceae;Vibrio;Vibrio cholerae	Vibrio cholerae	89370	99.92	0.38	Environment	Scaffold	ftp://ftp.ncbi.nlm.nih.gov/genomes/all/GCA/000/788/755/GCA_000788755.1_ASM78875v1
Cluster 1	GCA_000788775.1	Bacteria;Pseudomonadota;Gammaproteobacteria;Vibrionales;Vibrionaceae;Vibrio;Vibrio cholerae	Vibrio cholerae	61945	99.93	0.03	Human	Scaffold	ftp://ftp.ncbi.nlm.nih.gov/genomes/all/GCA/000/788/775/GCA_000788775.1_ASM78877v1
Cluster 1	GCA_000807405.4	Bacteria;Pseudomonadota;Gammaproteobacteria;Enterobacterales;Enterobacteriaceae;Enterobacter;Enterobacter hormaechei	Enterobacter hormaechei subsp. xiangfangensis	4930963	99.77	0.91	Human	Completed Genome	ftp://ftp.ncbi.nlm.nih.gov/genomes/all/GCA/000/807/405/GCA_000807405.4_ASM80740v4
Cluster 1	GCA_000807415.4	Bacteria;Pseudomonadota;Gammaproteobacteria;Enterobacterales;Enterobacteriaceae;Enterobacter;Enterobacter roggenkampii	Enterobacter roggenkampii	5017289	99.07	1.14	Human	Completed Genome	ftp://ftp.ncbi.nlm.nih.gov/genomes/all/GCA/000/807/415/GCA_000807415.4_ASM80741v4
Cluster 1	GCA_000814125.3	Bacteria;Pseudomonadota;Gammaproteobacteria;Enterobacterales;Enterobacteriaceae;Enterobacter;Enterobacter hormaechei	Enterobacter hormaechei subsp. steigerwaltii	4897485	99.51	1.27	Human	Completed Genome	ftp://ftp.ncbi.nlm.nih.gov/genomes/all/GCA/000/814/125/GCA_000814125.3_ASM81412v3
Cluster 1	GCA_000814225.1	Bacteria;Pseudomonadota;Gammaproteobacteria;Enterobacterales;Enterobacteriaceae;Enterobacter;Enterobacter hormaechei	Enterobacter hormaechei subsp. xiangfangensis	4784288	99.77	0.91	Human	Completed Genome	ftp://ftp.ncbi.nlm.nih.gov/genomes/all/GCA/000/814/225/GCA_000814225.1_ASM81422v1
Cluster 1	GCA_000816865.2	Bacteria;Pseudomonadota;Gammaproteobacteria;Enterobacterales;Enterobacteriaceae;Escherichia;Escherichia coli	Escherichia coli N37139PS	243223	99.97	0.09	Animal	Scaffold	ftp://ftp.ncbi.nlm.nih.gov/genomes/all/GCA/000/816/865/GCA_000816865.2_ASM81686v2
Cluster 1	GCA_000931575.1	Bacteria;Pseudomonadota;Gammaproteobacteria;Pasteurellales;Pasteurellaceae;Haemophilus;Haemophilus influenzae	Haemophilus influenzae	1846259	99.21	0.02	Human	Completed Genome	ftp://ftp.ncbi.nlm.nih.gov/genomes/all/GCA/000/931/575/GCA_000931575.1_ASM93157v1
Cluster 1	GCA_000931605.1	Bacteria;Pseudomonadota;Gammaproteobacteria;Pasteurellales;Pasteurellaceae;Haemophilus;Haemophilus influenzae	Haemophilus influenzae	1846503	99.63	0.02	Human	Completed Genome	ftp://ftp.ncbi.nlm.nih.gov/genomes/all/GCA/000/931/605/GCA_000931605.1_ASM93160v1
Cluster 1	GCA_000937455.2	Bacteria;Pseudomonadota;Gammaproteobacteria;Enterobacterales;Enterobacteriaceae;Citrobacter;Citrobacter freundii	Citrobacter freundii	1228041	100	0.44	Human	Scaffold	ftp://ftp.ncbi.nlm.nih.gov/genomes/all/GCA/000/937/455/GCA_000937455.2_ASM93745v2
Cluster 1	GCA_000952315.1	Bacteria;Pseudomonadota;Gammaproteobacteria;Enterobacterales;Enterobacteriaceae;Enterobacter;Enterobacter hormaechei	Enterobacter hormaechei	157517	99.38	0.69	Human	Scaffold	ftp://ftp.ncbi.nlm.nih.gov/genomes/all/GCA/000/952/315/GCA_000952315.1_ASM95231v1
Cluster 1	GCA_000952375.1	Bacteria;Pseudomonadota;Gammaproteobacteria;Enterobacterales;Enterobacteriaceae;Enterobacter;Enterobacter kobei	Enterobacter kobei	184298	99.67	0.18	Human	Scaffold	ftp://ftp.ncbi.nlm.nih.gov/genomes/all/GCA/000/952/375/GCA_000952375.1_ASM95237v1
Cluster 1	GCA_000952575.1	Bacteria;Pseudomonadota;Gammaproteobacteria;Enterobacterales;Enterobacteriaceae;Enterobacter;Enterobacter asburiae	Enterobacter asburiae	130558	99.5	0.03	Human	Scaffold	ftp://ftp.ncbi.nlm.nih.gov/genomes/all/GCA/000/952/575/GCA_000952575.1_ASM95257v1
Cluster 1	GCA_000952605.1	Bacteria;Pseudomonadota;Gammaproteobacteria;Enterobacterales;Enterobacteriaceae;Enterobacter;Enterobacter asburiae	Enterobacter asburiae	131368	99.97	0.83	Human	Scaffold	ftp://ftp.ncbi.nlm.nih.gov/genomes/all/GCA/000/952/605/GCA_000952605.1_ASM95260v1
Cluster 1	GCA_000958735.1	Bacteria;Pseudomonadota;Gammaproteobacteria;Enterobacterales;Enterobacteriaceae;Enterobacter;Enterobacter asburiae	Enterobacter asburiae	125846	99.61	0.69	Human	Scaffold	ftp://ftp.ncbi.nlm.nih.gov/genomes/all/GCA/000/958/735/GCA_000958735.1_ASM95873v1
Cluster 1	GCA_000958805.1	Bacteria;Pseudomonadota;Gammaproteobacteria;Enterobacterales;Enterobacteriaceae;Enterobacter;Enterobacter hormaechei	Enterobacter hormaechei	80732	99.89	0.76	Human	Scaffold	ftp://ftp.ncbi.nlm.nih.gov/genomes/all/GCA/000/958/805/GCA_000958805.1_ASM95880v1
Cluster 1	GCA_000958885.1	Bacteria;Pseudomonadota;Gammaproteobacteria;Enterobacterales;Enterobacteriaceae;Enterobacter;Enterobacter bugandensis	Enterobacter bugandensis	161689	99.42	0.12	Human	Scaffold	ftp://ftp.ncbi.nlm.nih.gov/genomes/all/GCA/000/958/885/GCA_000958885.1_ASM95888v1
Cluster 1	GCA_000959705.2	Bacteria;Pseudomonadota;Gammaproteobacteria;Aeromonadales;Aeromonadaceae;Aeromonas;Aeromonas caviae	Aeromonas caviae	4551368	99.38	0	Human	Completed Genome	ftp://ftp.ncbi.nlm.nih.gov/genomes/all/GCA/000/959/705/GCA_000959705.2_ASM95970v2
Cluster 1	GCA_000960645.1	Bacteria;Pseudomonadota;Gammaproteobacteria;Vibrionales;Vibrionaceae;Vibrio;Vibrio parahaemolyticus	Vibrio parahaemolyticus	402713	98.57	1.5	Human	Scaffold	ftp://ftp.ncbi.nlm.nih.gov/genomes/all/GCA/000/960/645/GCA_000960645.1_ASM96064v1
Cluster 1	GCA_000960655.1	Bacteria;Pseudomonadota;Gammaproteobacteria;Vibrionales;Vibrionaceae;Vibrio;Vibrio parahaemolyticus	Vibrio parahaemolyticus	319036	98.77	1.54	Human	Scaffold	ftp://ftp.ncbi.nlm.nih.gov/genomes/all/GCA/000/960/655/GCA_000960655.1_ASM96065v1
Cluster 1	GCA_000960665.1	Bacteria;Pseudomonadota;Gammaproteobacteria;Vibrionales;Vibrionaceae;Vibrio;Vibrio parahaemolyticus	Vibrio parahaemolyticus	315699	99.6	1.26	Human	Scaffold	ftp://ftp.ncbi.nlm.nih.gov/genomes/all/GCA/000/960/665/GCA_000960665.1_ASM96066v1
Cluster 1	GCA_000965555.1	Bacteria;Pseudomonadota;Gammaproteobacteria;Enterobacterales;Enterobacteriaceae;Escherichia;Escherichia coli	Escherichia coli	162846	98.87	0.22	Human	Scaffold	ftp://ftp.ncbi.nlm.nih.gov/genomes/all/GCA/000/965/555/GCA_000965555.1_ASM96555v1
Cluster 1	GCA_000965625.1	Bacteria;Pseudomonadota;Gammaproteobacteria;Enterobacterales;Enterobacteriaceae;Escherichia;Escherichia coli	Escherichia coli	238055	99.62	0.31	Human	Scaffold	ftp://ftp.ncbi.nlm.nih.gov/genomes/all/GCA/000/965/625/GCA_000965625.1_ASM96562v1
Cluster 1	GCA_000968115.1	Bacteria;Pseudomonadota;Gammaproteobacteria;Enterobacterales;Yersiniaceae;Yersinia;Yersinia enterocolitica	Yersinia enterocolitica (type O:5) str. YE53/03	4940199	97.56	4.29	Human	Completed Genome	ftp://ftp.ncbi.nlm.nih.gov/genomes/all/GCA/000/968/115/GCA_000968115.1_ASM96811v1
Cluster 1	GCA_000968725.1	Bacteria;Pseudomonadota;Gammaproteobacteria;Enterobacterales;Enterobacteriaceae;Enterobacter;Enterobacter roggenkampii	Enterobacter roggenkampii	163892	99.19	0.65	Human	Scaffold	ftp://ftp.ncbi.nlm.nih.gov/genomes/all/GCA/000/968/725/GCA_000968725.1_ASM96872v1
Cluster 1	GCA_000975245.1	Bacteria;Pseudomonadota;Gammaproteobacteria;Enterobacterales;Yersiniaceae;Serratia;Serratia liquefaciens	Serratia liquefaciens	5326657	99.81	0.96	Human	Completed Genome	ftp://ftp.ncbi.nlm.nih.gov/genomes/all/GCA/000/975/245/GCA_000975245.1_ASM97524v1
Cluster 1	GCA_000982825.1	Bacteria;Pseudomonadota;Gammaproteobacteria;Enterobacterales;Enterobacteriaceae;Cronobacter;Cronobacter sakazakii	Cronobacter sakazakii	4511265	99.97	0.2	Human	Completed Genome	ftp://ftp.ncbi.nlm.nih.gov/genomes/all/GCA/000/982/825/GCA_000982825.1_ASM98282v1
Cluster 1	GCA_001006125.1	Bacteria;Pseudomonadota;Gammaproteobacteria;Vibrionales;Vibrionaceae;Vibrio;Vibrio parahaemolyticus	Vibrio parahaemolyticus	383602	99.69	1.04	Human	Scaffold	ftp://ftp.ncbi.nlm.nih.gov/genomes/all/GCA/001/006/125/GCA_001006125.1_ASM100612v1
Cluster 1	GCA_001011015.1	Bacteria;Pseudomonadota;Gammaproteobacteria;Vibrionales;Vibrionaceae;Vibrio;Vibrio parahaemolyticus	Vibrio parahaemolyticus	260767	99.57	1.38	Human	Scaffold	ftp://ftp.ncbi.nlm.nih.gov/genomes/all/GCA/001/011/015/GCA_001011015.1_ASM101101v1
Cluster 1	GCA_001021995.1	Bacteria;Pseudomonadota;Gammaproteobacteria;Enterobacterales;Enterobacteriaceae;Klebsiella;Klebsiella aerogenes	Klebsiella aerogenes	5124987	99.94	0.33	Human	Completed Genome	ftp://ftp.ncbi.nlm.nih.gov/genomes/all/GCA/001/021/995/GCA_001021995.1_ASM102199v1
Cluster 1	GCA_001022015.1	Bacteria;Pseudomonadota;Gammaproteobacteria;Enterobacterales;Enterobacteriaceae;Enterobacter;Enterobacter hormaechei	Enterobacter hormaechei	4879702	99.45	0.18	Human	Completed Genome	ftp://ftp.ncbi.nlm.nih.gov/genomes/all/GCA/001/022/015/GCA_001022015.1_ASM102201v1
Cluster 1	GCA_001022095.1	Bacteria;Pseudomonadota;Gammaproteobacteria;Enterobacterales;Enterobacteriaceae;Enterobacter;Enterobacter asburiae	Enterobacter asburiae	4753402	99.89	2.14	Human	Completed Genome	ftp://ftp.ncbi.nlm.nih.gov/genomes/all/GCA/001/022/095/GCA_001022095.1_ASM102209v1
Cluster 1	GCA_001022215.1	Bacteria;Pseudomonadota;Gammaproteobacteria;Enterobacterales;Yersiniaceae;Serratia;Serratia marcescens	Serratia marcescens	5477084	99.88	0.11	Human	Completed Genome	ftp://ftp.ncbi.nlm.nih.gov/genomes/all/GCA/001/022/215/GCA_001022215.1_ASM102221v1
Cluster 1	GCA_001023125.1	Bacteria;Pseudomonadota;Gammaproteobacteria;Vibrionales;Vibrionaceae;Vibrio;Vibrio parahaemolyticus	Vibrio parahaemolyticus	558312	99.71	0.69	Animal	Scaffold	ftp://ftp.ncbi.nlm.nih.gov/genomes/all/GCA/001/023/125/GCA_001023125.1_ASM102312v1
Cluster 1	GCA_001023155.1	Bacteria;Pseudomonadota;Gammaproteobacteria;Vibrionales;Vibrionaceae;Vibrio;Vibrio parahaemolyticus	Vibrio parahaemolyticus	402360	99.89	1.22	Human	Scaffold	ftp://ftp.ncbi.nlm.nih.gov/genomes/all/GCA/001/023/155/GCA_001023155.1_ASM102315v1
Cluster 1	GCA_001027225.1	Bacteria;Pseudomonadota;Gammaproteobacteria;Enterobacterales;Enterobacteriaceae;Shigella;Shigella boydii	Shigella boydii	4574246	99.3	0.75	Human	Completed Genome	ftp://ftp.ncbi.nlm.nih.gov/genomes/all/GCA/001/027/225/GCA_001027225.1_ASM102722v1
Cluster 1	GCA_001030105.1	Bacteria;Pseudomonadota;Gammaproteobacteria;Aeromonadales;Aeromonadaceae;Aeromonas;Aeromonas caviae	Aeromonas caviae	308688	99.22	0.47	Human	Scaffold	ftp://ftp.ncbi.nlm.nih.gov/genomes/all/GCA/001/030/105/GCA_001030105.1_Aero_hydr_BWH65_V1
Cluster 1	GCA_001030125.1	Bacteria;Pseudomonadota;Gammaproteobacteria;Enterobacterales;Enterobacteriaceae;Klebsiella;Klebsiella aerogenes	Klebsiella aerogenes	704708	99.11	0.1	Human	Scaffold	ftp://ftp.ncbi.nlm.nih.gov/genomes/all/GCA/001/030/125/GCA_001030125.1_Ente_aero_UCI89_V1
Cluster 1	GCA_001030185.1	Bacteria;Pseudomonadota;Gammaproteobacteria;Enterobacterales;Enterobacteriaceae;Klebsiella;Klebsiella aerogenes	Klebsiella aerogenes	1083156	99.7	0.04	Human	Scaffold	ftp://ftp.ncbi.nlm.nih.gov/genomes/all/GCA/001/030/185/GCA_001030185.1_Ente_aero_UCI97_V1
Cluster 1	GCA_001034395.1	Bacteria;Pseudomonadota;Gammaproteobacteria;Enterobacterales;Yersiniaceae;Serratia;Serratia marcescens	Serratia marcescens	783197	99.81	0.15	Human	Scaffold	ftp://ftp.ncbi.nlm.nih.gov/genomes/all/GCA/001/034/395/GCA_001034395.1_Serr_marc_UCI87_V1
Cluster 1	GCA_001043315.1	Bacteria;Pseudomonadota;Gammaproteobacteria;Pasteurellales;Pasteurellaceae;Haemophilus;[Haemophilus] ducreyi	[Haemophilus] ducreyi	873363	95.12	0.48	Human	Chromosome	ftp://ftp.ncbi.nlm.nih.gov/genomes/all/GCA/001/043/315/GCA_001043315.1_ASM104331v1
Cluster 1	GCA_001043435.1	Bacteria;Pseudomonadota;Gammaproteobacteria;Pasteurellales;Pasteurellaceae;Haemophilus;[Haemophilus] ducreyi	[Haemophilus] ducreyi	854405	96.88	0.62	Human	Chromosome	ftp://ftp.ncbi.nlm.nih.gov/genomes/all/GCA/001/043/435/GCA_001043435.1_ASM104343v1
Cluster 1	GCA_001050735.1	Bacteria;Pseudomonadota;Gammaproteobacteria;Enterobacterales;Yersiniaceae;Yersinia;Yersinia enterocolitica	Yersinia enterocolitica (type O:9) str. YE212/02	1011144	99.68	1.1	Human	Scaffold	ftp://ftp.ncbi.nlm.nih.gov/genomes/all/GCA/001/050/735/GCA_001050735.1_ASM105073v1
Cluster 1	GCA_001052055.1	Bacteria;Pseudomonadota;Gammaproteobacteria;Enterobacterales;Enterobacteriaceae;Enterobacter;Enterobacter roggenkampii	Enterobacter roggenkampii	54937	99.07	0.06	Human	Scaffold	ftp://ftp.ncbi.nlm.nih.gov/genomes/all/GCA/001/052/055/GCA_001052055.1_ASM105205v1
Cluster 1	GCA_001052135.1	Bacteria;Pseudomonadota;Gammaproteobacteria;Enterobacterales;Enterobacteriaceae;Enterobacter;Enterobacter asburiae	Enterobacter asburiae	92927	99.97	0.33	Human	Scaffold	ftp://ftp.ncbi.nlm.nih.gov/genomes/all/GCA/001/052/135/GCA_001052135.1_ASM105213v1
Cluster 1	GCA_001052145.1	Bacteria;Pseudomonadota;Gammaproteobacteria;Enterobacterales;Enterobacteriaceae;Enterobacter;Enterobacter asburiae	Enterobacter asburiae	76332	99.97	1	Human	Scaffold	ftp://ftp.ncbi.nlm.nih.gov/genomes/all/GCA/001/052/145/GCA_001052145.1_ASM105214v1
Cluster 1	GCA_001052195.1	Bacteria;Pseudomonadota;Gammaproteobacteria;Enterobacterales;Enterobacteriaceae;Enterobacter;Enterobacter cloacae	Enterobacter cloacae	82906	98.78	0.71	Human	Scaffold	ftp://ftp.ncbi.nlm.nih.gov/genomes/all/GCA/001/052/195/GCA_001052195.1_ASM105219v1
Cluster 1	GCA_001052475.1	Bacteria;Pseudomonadota;Gammaproteobacteria;Enterobacterales;Enterobacteriaceae;Klebsiella;Klebsiella pneumoniae	Klebsiella pneumoniae	61971	100	0.23	Human	Scaffold	ftp://ftp.ncbi.nlm.nih.gov/genomes/all/GCA/001/052/475/GCA_001052475.1_ASM105247v1
Cluster 1	GCA_001052595.1	Bacteria;Pseudomonadota;Gammaproteobacteria;Enterobacterales;Enterobacteriaceae;Enterobacter;Enterobacter cloacae	Enterobacter cloacae	54512	99.72	1.06	Human	Scaffold	ftp://ftp.ncbi.nlm.nih.gov/genomes/all/GCA/001/052/595/GCA_001052595.1_ASM105259v1
Cluster 1	GCA_001052895.1	Bacteria;Pseudomonadota;Gammaproteobacteria;Enterobacterales;Enterobacteriaceae;Enterobacter;Enterobacter roggenkampii	Enterobacter roggenkampii	66506	99.07	0.52	Human	Scaffold	ftp://ftp.ncbi.nlm.nih.gov/genomes/all/GCA/001/052/895/GCA_001052895.1_ASM105289v1
Cluster 1	GCA_001052955.1	Bacteria;Pseudomonadota;Gammaproteobacteria;Enterobacterales;Enterobacteriaceae;Enterobacter;Enterobacter hormaechei	Enterobacter hormaechei subsp. steigerwaltii	102887	99.47	0.73	Human	Scaffold	ftp://ftp.ncbi.nlm.nih.gov/genomes/all/GCA/001/052/955/GCA_001052955.1_ASM105295v1
Cluster 1	GCA_001053395.1	Bacteria;Pseudomonadota;Gammaproteobacteria;Enterobacterales;Enterobacteriaceae;Enterobacter;Enterobacter kobei	Enterobacter kobei	61112	99.67	0.53	Human	Scaffold	ftp://ftp.ncbi.nlm.nih.gov/genomes/all/GCA/001/053/395/GCA_001053395.1_ASM105339v1
Cluster 1	GCA_001054405.1	Bacteria;Pseudomonadota;Gammaproteobacteria;Enterobacterales;Enterobacteriaceae;Klebsiella;Klebsiella aerogenes	Klebsiella aerogenes	152845	100	0.04	Human	Scaffold	ftp://ftp.ncbi.nlm.nih.gov/genomes/all/GCA/001/054/405/GCA_001054405.1_ASM105440v1
Cluster 1	GCA_001054435.1	Bacteria;Pseudomonadota;Gammaproteobacteria;Enterobacterales;Enterobacteriaceae;Enterobacter;Enterobacter bugandensis	Enterobacter bugandensis	149136	99.5	0.39	Human	Scaffold	ftp://ftp.ncbi.nlm.nih.gov/genomes/all/GCA/001/054/435/GCA_001054435.1_ASM105443v1
Cluster 1	GCA_001054505.1	Bacteria;Pseudomonadota;Gammaproteobacteria;Enterobacterales;Enterobacteriaceae;Enterobacter;Enterobacter bugandensis	Enterobacter bugandensis	143393	99.77	0.49	Human	Scaffold	ftp://ftp.ncbi.nlm.nih.gov/genomes/all/GCA/001/054/505/GCA_001054505.1_ASM105450v1
Cluster 1	GCA_001054695.1	Bacteria;Pseudomonadota;Gammaproteobacteria;Enterobacterales;Enterobacteriaceae;Enterobacter;Enterobacter hormaechei	Enterobacter hormaechei subsp. steigerwaltii	129314	99.47	0.14	Human	Scaffold	ftp://ftp.ncbi.nlm.nih.gov/genomes/all/GCA/001/054/695/GCA_001054695.1_ASM105469v1
Cluster 1	GCA_001055075.1	Bacteria;Pseudomonadota;Gammaproteobacteria;Enterobacterales;Enterobacteriaceae;Enterobacter;Enterobacter cloacae	Enterobacter cloacae	138583	99.06	3.91	Human	Scaffold	ftp://ftp.ncbi.nlm.nih.gov/genomes/all/GCA/001/055/075/GCA_001055075.1_ASM105507v1
Cluster 1	GCA_001055155.1	Bacteria;Pseudomonadota;Gammaproteobacteria;Enterobacterales;Enterobacteriaceae;Escherichia;Escherichia coli	Escherichia coli	75866	99.97	0.26	Human	Scaffold	ftp://ftp.ncbi.nlm.nih.gov/genomes/all/GCA/001/055/155/GCA_001055155.1_ASM105515v1
Cluster 1	GCA_001055195.1	Bacteria;Pseudomonadota;Gammaproteobacteria;Aeromonadales;Aeromonadaceae;Aeromonas;Aeromonas hydrophila	Aeromonas hydrophila	76510	98.69	2.24	Human	Scaffold	ftp://ftp.ncbi.nlm.nih.gov/genomes/all/GCA/001/055/195/GCA_001055195.1_ASM105519v1
Cluster 1	GCA_001055275.1	Bacteria;Pseudomonadota;Gammaproteobacteria;Pasteurellales;Pasteurellaceae;Haemophilus;Haemophilus influenzae	Haemophilus influenzae	69550	99.65	0.02	Human	Scaffold	ftp://ftp.ncbi.nlm.nih.gov/genomes/all/GCA/001/055/275/GCA_001055275.1_ASM105527v1
Cluster 1	GCA_001055295.1	Bacteria;Pseudomonadota;Gammaproteobacteria;Enterobacterales;Enterobacteriaceae;Citrobacter;Citrobacter freundii	Citrobacter freundii	79924	95.85	3.4	Human	Scaffold	ftp://ftp.ncbi.nlm.nih.gov/genomes/all/GCA/001/055/295/GCA_001055295.1_ASM105529v1
Cluster 1	GCA_001055515.1	Bacteria;Pseudomonadota;Gammaproteobacteria;Enterobacterales;Enterobacteriaceae;Enterobacter;Enterobacter bugandensis	Enterobacter bugandensis	68093	99.46	0.44	Human	Scaffold	ftp://ftp.ncbi.nlm.nih.gov/genomes/all/GCA/001/055/515/GCA_001055515.1_ASM105551v1
Cluster 1	GCA_001058505.1	Bacteria;Pseudomonadota;Gammaproteobacteria;Enterobacterales;Enterobacteriaceae;Citrobacter;Citrobacter freundii	Citrobacter freundii	86152	99.11	4.23	Human	Scaffold	ftp://ftp.ncbi.nlm.nih.gov/genomes/all/GCA/001/058/505/GCA_001058505.1_ASM105850v1
Cluster 1	GCA_001058575.1	Bacteria;Pseudomonadota;Gammaproteobacteria;Pasteurellales;Pasteurellaceae;Haemophilus;Haemophilus influenzae	Haemophilus influenzae	105276	95.95	4.68	Human	Scaffold	ftp://ftp.ncbi.nlm.nih.gov/genomes/all/GCA/001/058/575/GCA_001058575.1_ASM105857v1
Cluster 1	GCA_001058645.1	Bacteria;Pseudomonadota;Gammaproteobacteria;Enterobacterales;Enterobacteriaceae;Klebsiella;Klebsiella aerogenes	Klebsiella aerogenes	55350	100	0.92	Human	Scaffold	ftp://ftp.ncbi.nlm.nih.gov/genomes/all/GCA/001/058/645/GCA_001058645.1_ASM105864v1
Cluster 1	GCA_001058675.1	Bacteria;Pseudomonadota;Gammaproteobacteria;Enterobacterales;Enterobacteriaceae;Citrobacter;Citrobacter freundii	Citrobacter freundii	52702	96.75	4.62	Human	Scaffold	ftp://ftp.ncbi.nlm.nih.gov/genomes/all/GCA/001/058/675/GCA_001058675.1_ASM105867v1
Cluster 1	GCA_001059905.1	Bacteria;Pseudomonadota;Gammaproteobacteria;Enterobacterales;Enterobacteriaceae;Enterobacter;Enterobacter hormaechei	Enterobacter hormaechei subsp. steigerwaltii	119025	99.47	0.39	Human	Scaffold	ftp://ftp.ncbi.nlm.nih.gov/genomes/all/GCA/001/059/905/GCA_001059905.1_ASM105990v1
Cluster 1	GCA_001060475.1	Bacteria;Pseudomonadota;Gammaproteobacteria;Enterobacterales;Enterobacteriaceae;Shigella;Shigella boydii	Shigella boydii	127456	99.86	1.45	Human	Scaffold	ftp://ftp.ncbi.nlm.nih.gov/genomes/all/GCA/001/060/475/GCA_001060475.1_ASM106047v1
Cluster 1	GCA_001060585.1	Bacteria;Pseudomonadota;Gammaproteobacteria;Enterobacterales;Yersiniaceae;Serratia;Serratia marcescens	Serratia marcescens	82520	99.8	0.6	Human	Scaffold	ftp://ftp.ncbi.nlm.nih.gov/genomes/all/GCA/001/060/585/GCA_001060585.1_ASM106058v1
Cluster 1	GCA_001062165.1	Bacteria;Pseudomonadota;Gammaproteobacteria;Enterobacterales;Enterobacteriaceae;Citrobacter;Citrobacter braakii	Citrobacter braakii	140016	99.97	0.82	Human	Scaffold	ftp://ftp.ncbi.nlm.nih.gov/genomes/all/GCA/001/062/165/GCA_001062165.1_ASM106216v1
Cluster 1	GCA_001062925.1	Bacteria;Pseudomonadota;Gammaproteobacteria;Enterobacterales;Yersiniaceae;Serratia;Serratia liquefaciens	Serratia liquefaciens	196824	99.91	0.96	Human	Scaffold	ftp://ftp.ncbi.nlm.nih.gov/genomes/all/GCA/001/062/925/GCA_001062925.1_ASM106292v1
Cluster 1	GCA_001063125.1	Bacteria;Pseudomonadota;Gammaproteobacteria;Enterobacterales;Yersiniaceae;Serratia;Serratia marcescens	Serratia marcescens	189638	98.11	3.21	Human	Scaffold	ftp://ftp.ncbi.nlm.nih.gov/genomes/all/GCA/001/063/125/GCA_001063125.1_ASM106312v1
Cluster 1	GCA_001063325.1	Bacteria;Pseudomonadota;Gammaproteobacteria;Enterobacterales;Yersiniaceae;Serratia;Serratia marcescens	Serratia marcescens	123543	99.86	0	Human	Scaffold	ftp://ftp.ncbi.nlm.nih.gov/genomes/all/GCA/001/063/325/GCA_001063325.1_ASM106332v1
Cluster 1	GCA_001065405.1	Bacteria;Pseudomonadota;Gammaproteobacteria;Enterobacterales;Yersiniaceae;Serratia;Serratia marcescens	Serratia marcescens	117900	99.81	0	Human	Scaffold	ftp://ftp.ncbi.nlm.nih.gov/genomes/all/GCA/001/065/405/GCA_001065405.1_ASM106540v1
Cluster 1	GCA_001065805.1	Bacteria;Pseudomonadota;Gammaproteobacteria;Enterobacterales;Enterobacteriaceae;Citrobacter;Citrobacter braakii	Citrobacter braakii	101098	99.82	0.79	Human	Scaffold	ftp://ftp.ncbi.nlm.nih.gov/genomes/all/GCA/001/065/805/GCA_001065805.1_ASM106580v1
Cluster 1	GCA_001066285.1	Bacteria;Pseudomonadota;Gammaproteobacteria;Enterobacterales;Enterobacteriaceae;Shigella;Shigella sonnei	Shigella sonnei	98199	99.81	1.4	Human	Scaffold	ftp://ftp.ncbi.nlm.nih.gov/genomes/all/GCA/001/066/285/GCA_001066285.1_ASM106628v1
Cluster 1	GCA_001066745.1	Bacteria;Pseudomonadota;Gammaproteobacteria;Enterobacterales;Morganellaceae;Morganella;Morganella morganii	Morganella morganii	92760	99.78	0	Human	Scaffold	ftp://ftp.ncbi.nlm.nih.gov/genomes/all/GCA/001/066/745/GCA_001066745.1_ASM106674v1
Cluster 1	GCA_001076835.1	Bacteria;Pseudomonadota;Gammaproteobacteria;Pasteurellales;Pasteurellaceae;Haemophilus;Haemophilus influenzae	Haemophilus influenzae	63421	99.65	0.02	Human	Scaffold	ftp://ftp.ncbi.nlm.nih.gov/genomes/all/GCA/001/076/835/GCA_001076835.1_ASM107683v1
Cluster 1	GCA_001077015.1	Bacteria;Pseudomonadota;Gammaproteobacteria;Enterobacterales;Enterobacteriaceae;Enterobacter;Enterobacter cloacae	Enterobacter cloacae	80353	98.48	1.66	Human	Scaffold	ftp://ftp.ncbi.nlm.nih.gov/genomes/all/GCA/001/077/015/GCA_001077015.1_ASM107701v1
Cluster 1	GCA_001086525.1	Bacteria;Pseudomonadota;Gammaproteobacteria;Enterobacterales;Yersiniaceae;Yersinia;Yersinia enterocolitica	Yersinia enterocolitica	206388	97.26	2.67	Human	Scaffold	ftp://ftp.ncbi.nlm.nih.gov/genomes/all/GCA/001/086/525/GCA_001086525.1_4976_6_7
Cluster 1	GCA_001088505.1	Bacteria;Pseudomonadota;Gammaproteobacteria;Enterobacterales;Yersiniaceae;Yersinia;Yersinia intermedia	Yersinia intermedia	79961	99.64	2.77	Animal	Scaffold	ftp://ftp.ncbi.nlm.nih.gov/genomes/all/GCA/001/088/505/GCA_001088505.1_4840_7_1
Cluster 1	GCA_001089645.1	Bacteria;Pseudomonadota;Gammaproteobacteria;Enterobacterales;Yersiniaceae;Yersinia;Yersinia frederiksenii	Yersinia frederiksenii	173201	99.74	2.31	Human	Scaffold	ftp://ftp.ncbi.nlm.nih.gov/genomes/all/GCA/001/089/645/GCA_001089645.1_4821_6_9
Cluster 1	GCA_001090165.1	Bacteria;Pseudomonadota;Gammaproteobacteria;Enterobacterales;Yersiniaceae;Yersinia;Yersinia frederiksenii	Yersinia frederiksenii	160476	99.87	1.56	Human	Scaffold	ftp://ftp.ncbi.nlm.nih.gov/genomes/all/GCA/001/090/165/GCA_001090165.1_4821_6_2
Cluster 1	GCA_001098625.1	Bacteria;Pseudomonadota;Gammaproteobacteria;Enterobacterales;Yersiniaceae;Yersinia;Yersinia frederiksenii	Yersinia frederiksenii	449491	99.72	1.34	Human	Scaffold	ftp://ftp.ncbi.nlm.nih.gov/genomes/all/GCA/001/098/625/GCA_001098625.1_5139_5_4
Cluster 1	GCA_001105765.1	Bacteria;Pseudomonadota;Gammaproteobacteria;Enterobacterales;Yersiniaceae;Yersinia;Yersinia frederiksenii	Yersinia frederiksenii	208465	99.61	1.48	Environment	Scaffold	ftp://ftp.ncbi.nlm.nih.gov/genomes/all/GCA/001/105/765/GCA_001105765.1_4821_5_3
Cluster 1	GCA_001106265.1	Bacteria;Pseudomonadota;Gammaproteobacteria;Enterobacterales;Yersiniaceae;Yersinia;Yersinia enterocolitica	Yersinia enterocolitica	139926	99.84	0.19	Environment	Scaffold	ftp://ftp.ncbi.nlm.nih.gov/genomes/all/GCA/001/106/265/GCA_001106265.1_5116_3_10
Cluster 1	GCA_001116865.1	Bacteria;Pseudomonadota;Gammaproteobacteria;Enterobacterales;Yersiniaceae;Yersinia;Yersinia intermedia	Yersinia intermedia	277346	99.62	0.85	Human	Scaffold	ftp://ftp.ncbi.nlm.nih.gov/genomes/all/GCA/001/116/865/GCA_001116865.1_4840_6_5
Cluster 1	GCA_001121225.1	Bacteria;Pseudomonadota;Gammaproteobacteria;Enterobacterales;Yersiniaceae;Yersinia;Yersinia frederiksenii	Yersinia frederiksenii	165917	99.88	3.5	Human	Scaffold	ftp://ftp.ncbi.nlm.nih.gov/genomes/all/GCA/001/121/225/GCA_001121225.1_4821_8_11
Cluster 1	GCA_001135485.1	Bacteria;Pseudomonadota;Gammaproteobacteria;Enterobacterales;Yersiniaceae;Yersinia;Yersinia frederiksenii	Yersinia frederiksenii	303047	99.8	2.08	Human	Scaffold	ftp://ftp.ncbi.nlm.nih.gov/genomes/all/GCA/001/135/485/GCA_001135485.1_5139_5_6
Cluster 1	GCA_001140765.1	Bacteria;Pseudomonadota;Gammaproteobacteria;Enterobacterales;Yersiniaceae;Yersinia;Yersinia intermedia	Yersinia intermedia	181917	99.42	1.2	Environment	Scaffold	ftp://ftp.ncbi.nlm.nih.gov/genomes/all/GCA/001/140/765/GCA_001140765.1_4821_5_11
Cluster 1	GCA_001147425.1	Bacteria;Pseudomonadota;Gammaproteobacteria;Enterobacterales;Yersiniaceae;Yersinia;Yersinia frederiksenii	Yersinia frederiksenii	145197	99.64	1.37	Environment	Scaffold	ftp://ftp.ncbi.nlm.nih.gov/genomes/all/GCA/001/147/425/GCA_001147425.1_4821_5_9
Cluster 1	GCA_001254095.1	Bacteria;Pseudomonadota;Gammaproteobacteria;Vibrionales;Vibrionaceae;Vibrio;Vibrio cholerae	Vibrio cholerae	293336	99.98	0.08	Human	Scaffold	ftp://ftp.ncbi.nlm.nih.gov/genomes/all/GCA/001/254/095/GCA_001254095.1_5174_8_7
Cluster 1	GCA_001267945.1	Bacteria;Pseudomonadota;Gammaproteobacteria;Vibrionales;Vibrionaceae;Vibrio;Vibrio alginolyticus	Vibrio alginolyticus	245572	100	0.49	Animal	Scaffold	ftp://ftp.ncbi.nlm.nih.gov/genomes/all/GCA/001/267/945/GCA_001267945.1_ASM126794v1
Cluster 1	GCA_001267965.1	Bacteria;Pseudomonadota;Gammaproteobacteria;Vibrionales;Vibrionaceae;Vibrio;Vibrio parahaemolyticus	Vibrio parahaemolyticus	427514	98.39	1.88	Animal	Scaffold	ftp://ftp.ncbi.nlm.nih.gov/genomes/all/GCA/001/267/965/GCA_001267965.1_ASM126796v1
Cluster 1	GCA_001273715.1	Bacteria;Pseudomonadota;Gammaproteobacteria;Vibrionales;Vibrionaceae;Vibrio;Vibrio alginolyticus	Vibrio alginolyticus	278695	100	0.46	Animal	Scaffold	ftp://ftp.ncbi.nlm.nih.gov/genomes/all/GCA/001/273/715/GCA_001273715.1_ASM127371v1
Cluster 1	GCA_001280625.1	Bacteria;Pseudomonadota;Gammaproteobacteria;Vibrionales;Vibrionaceae;Vibrio;Vibrio parahaemolyticus	Vibrio parahaemolyticus	210613	100	4.73	Animal	Scaffold	ftp://ftp.ncbi.nlm.nih.gov/genomes/all/GCA/001/280/625/GCA_001280625.1_ASM128062v1
Cluster 1	GCA_001280705.1	Bacteria;Pseudomonadota;Gammaproteobacteria;Vibrionales;Vibrionaceae;Vibrio;Vibrio parahaemolyticus	Vibrio parahaemolyticus	174007	98.39	4.72	Animal	Scaffold	ftp://ftp.ncbi.nlm.nih.gov/genomes/all/GCA/001/280/705/GCA_001280705.1_ASM128070v1
Cluster 1	GCA_001283345.2	Bacteria;Pseudomonadota;Gammaproteobacteria;Enterobacterales;Enterobacteriaceae;Escherichia;Escherichia coli	Escherichia coli	303955	98.84	0.26	Human	Scaffold	ftp://ftp.ncbi.nlm.nih.gov/genomes/all/GCA/001/283/345/GCA_001283345.2_8205_3_55
Cluster 1	GCA_001283865.2	Bacteria;Pseudomonadota;Gammaproteobacteria;Enterobacterales;Enterobacteriaceae;Escherichia;Escherichia coli	Escherichia coli	281913	99.13	0.19	Human	Scaffold	ftp://ftp.ncbi.nlm.nih.gov/genomes/all/GCA/001/283/865/GCA_001283865.2_8205_3_32
Cluster 1	GCA_001284705.1	Bacteria;Pseudomonadota;Gammaproteobacteria;Enterobacterales;Enterobacteriaceae;Escherichia;Escherichia coli	Escherichia coli	97132	99.62	1.05	Human	Scaffold	ftp://ftp.ncbi.nlm.nih.gov/genomes/all/GCA/001/284/705/GCA_001284705.1_8205_3_17
Cluster 1	GCA_001285545.2	Bacteria;Pseudomonadota;Gammaproteobacteria;Enterobacterales;Enterobacteriaceae;Escherichia;Escherichia coli	Escherichia coli	150236	99.93	0.32	Human	Scaffold	ftp://ftp.ncbi.nlm.nih.gov/genomes/all/GCA/001/285/545/GCA_001285545.2_8205_3_44
Cluster 1	GCA_001306015.1	Bacteria;Pseudomonadota;Gammaproteobacteria;Aeromonadales;Aeromonadaceae;Aeromonas;Aeromonas dhakensis	Aeromonas dhakensis	741754	99.96	0.38	Enironment	Scaffold	ftp://ftp.ncbi.nlm.nih.gov/genomes/all/GCA/001/306/015/GCA_001306015.1_ASM130601v1
Cluster 1	GCA_001402255.1	Bacteria;Pseudomonadota;Gammaproteobacteria;Vibrionales;Vibrionaceae;Vibrio;Vibrio cholerae	Vibrio cholerae	317073	99.98	0.05	Environment	Scaffold	ftp://ftp.ncbi.nlm.nih.gov/genomes/all/GCA/001/402/255/GCA_001402255.1_ASM140225v1
Cluster 1	GCA_001402265.1	Bacteria;Pseudomonadota;Gammaproteobacteria;Vibrionales;Vibrionaceae;Vibrio;Vibrio cholerae	Vibrio cholerae	301244	98.54	2.91	Environment	Scaffold	ftp://ftp.ncbi.nlm.nih.gov/genomes/all/GCA/001/402/265/GCA_001402265.1_ASM140226v1
Cluster 1	GCA_001402335.1	Bacteria;Pseudomonadota;Gammaproteobacteria;Vibrionales;Vibrionaceae;Vibrio;Vibrio cholerae	Vibrio cholerae	277755	98.39	2.2	Environment	Scaffold	ftp://ftp.ncbi.nlm.nih.gov/genomes/all/GCA/001/402/335/GCA_001402335.1_ASM140233v1
Cluster 1	GCA_001402425.1	Bacteria;Pseudomonadota;Gammaproteobacteria;Vibrionales;Vibrionaceae;Vibrio;Vibrio cholerae	Vibrio cholerae	279493	99.64	1.16	Environment	Scaffold	ftp://ftp.ncbi.nlm.nih.gov/genomes/all/GCA/001/402/425/GCA_001402425.1_ASM140242v1
Cluster 1	GCA_001402545.1	Bacteria;Pseudomonadota;Gammaproteobacteria;Vibrionales;Vibrionaceae;Vibrio;Vibrio cholerae	Vibrio cholerae	285424	98.87	0.92	Environment	Scaffold	ftp://ftp.ncbi.nlm.nih.gov/genomes/all/GCA/001/402/545/GCA_001402545.1_ASM140254v1
Cluster 1	GCA_001417865.2	Bacteria;Pseudomonadota;Gammaproteobacteria;Enterobacterales;Yersiniaceae;Serratia;Serratia marcescens	Serratia marcescens	5471721	99.86	0	Enironment	Completed Genome	ftp://ftp.ncbi.nlm.nih.gov/genomes/all/GCA/001/417/865/GCA_001417865.2_ASM141786v2
Cluster 1	GCA_001433415.1	Bacteria;Pseudomonadota;Gammaproteobacteria;Vibrionales;Vibrionaceae;Vibrio;Vibrio parahaemolyticus	Vibrio parahaemolyticus	3348850	98.51	1.6	Environment	Completed Genome	ftp://ftp.ncbi.nlm.nih.gov/genomes/all/GCA/001/433/415/GCA_001433415.1_ASM143341v1
Cluster 1	GCA_001433435.1	Bacteria;Pseudomonadota;Gammaproteobacteria;Vibrionales;Vibrionaceae;Vibrio;Vibrio vulnificus	Vibrio vulnificus	3222762	97.57	1.7	Human	Completed Genome	ftp://ftp.ncbi.nlm.nih.gov/genomes/all/GCA/001/433/435/GCA_001433435.1_ASM143343v1
Cluster 1	GCA_001447335.1	Bacteria;Pseudomonadota;Gammaproteobacteria;Aeromonadales;Aeromonadaceae;Aeromonas;Aeromonas schubertii	Aeromonas schubertii	4400034	96.09	0.33	Enironment	Completed Genome	ftp://ftp.ncbi.nlm.nih.gov/genomes/all/GCA/001/447/335/GCA_001447335.1_ASM144733v1
Cluster 1	GCA_001481395.1	Bacteria;Pseudomonadota;Gammaproteobacteria;Aeromonadales;Aeromonadaceae;Aeromonas;Aeromonas schubertii	Aeromonas schubertii	144100	98.09	0.4	Human	Scaffold	ftp://ftp.ncbi.nlm.nih.gov/genomes/all/GCA/001/481/395/GCA_001481395.1_ASM148139v1
Cluster 1	GCA_001482545.1	Bacteria;Pseudomonadota;Gammaproteobacteria;Enterobacterales;Enterobacteriaceae;Citrobacter;Citrobacter freundii	Citrobacter freundii	519422	98.03	3.52	Human	Scaffold	ftp://ftp.ncbi.nlm.nih.gov/genomes/all/GCA/001/482/545/GCA_001482545.1_ASM148254v1
Cluster 1	GCA_001482565.1	Bacteria;Pseudomonadota;Gammaproteobacteria;Enterobacterales;Enterobacteriaceae;Enterobacter;Enterobacter asburiae	Enterobacter asburiae	165558	99.97	0.45	Human	Scaffold	ftp://ftp.ncbi.nlm.nih.gov/genomes/all/GCA/001/482/565/GCA_001482565.1_ASM148256v1
Cluster 1	GCA_001518855.1	Bacteria;Pseudomonadota;Gammaproteobacteria;Enterobacterales;Enterobacteriaceae;Shigella;Shigella sonnei	Shigella sonnei	4824850	99.44	0.11	Human	Completed Genome	ftp://ftp.ncbi.nlm.nih.gov/genomes/all/GCA/001/518/855/GCA_001518855.1_ASM151885v1
Cluster 1	GCA_001521715.1	Bacteria;Pseudomonadota;Gammaproteobacteria;Enterobacterales;Enterobacteriaceae;Enterobacter;Enterobacter asburiae	Enterobacter asburiae	4713742	98.97	0.63	Human	Completed Genome	ftp://ftp.ncbi.nlm.nih.gov/genomes/all/GCA/001/521/715/GCA_001521715.1_ASM152171v1
Cluster 1	GCA_001536365.1	Bacteria;Pseudomonadota;Gammaproteobacteria;Enterobacterales;Yersiniaceae;Serratia;Serratia marcescens	Serratia marcescens	314235	99.24	0	Human	Scaffold	ftp://ftp.ncbi.nlm.nih.gov/genomes/all/GCA/001/536/365/GCA_001536365.1_12082_3_76
Cluster 1	GCA_001536605.1	Bacteria;Pseudomonadota;Gammaproteobacteria;Enterobacterales;Yersiniaceae;Serratia;Serratia marcescens	Serratia marcescens	433635	99.59	0	Human	Scaffold	ftp://ftp.ncbi.nlm.nih.gov/genomes/all/GCA/001/536/605/GCA_001536605.1_12045_8_19
Cluster 1	GCA_001537085.1	Bacteria;Pseudomonadota;Gammaproteobacteria;Enterobacterales;Yersiniaceae;Serratia;Serratia marcescens	Serratia marcescens	303820	99.42	0	Human	Scaffold	ftp://ftp.ncbi.nlm.nih.gov/genomes/all/GCA/001/537/085/GCA_001537085.1_12082_3_93
Cluster 1	GCA_001537145.1	Bacteria;Pseudomonadota;Gammaproteobacteria;Enterobacterales;Yersiniaceae;Serratia;Serratia marcescens	Serratia marcescens	245710	99.6	0.15	Human	Scaffold	ftp://ftp.ncbi.nlm.nih.gov/genomes/all/GCA/001/537/145/GCA_001537145.1_12082_2_28
Cluster 1	GCA_001538195.1	Bacteria;Pseudomonadota;Gammaproteobacteria;Enterobacterales;Yersiniaceae;Serratia;Serratia marcescens	Serratia marcescens	245080	99.75	0.11	Human	Scaffold	ftp://ftp.ncbi.nlm.nih.gov/genomes/all/GCA/001/538/195/GCA_001538195.1_12045_8_14
Cluster 1	GCA_001539985.1	Bacteria;Pseudomonadota;Gammaproteobacteria;Enterobacterales;Yersiniaceae;Serratia;Serratia marcescens	Serratia marcescens	280841	99.81	0	Human	Scaffold	ftp://ftp.ncbi.nlm.nih.gov/genomes/all/GCA/001/539/985/GCA_001539985.1_12045_8_24
Cluster 1	GCA_001541625.1	Bacteria;Pseudomonadota;Gammaproteobacteria;Vibrionales;Vibrionaceae;Vibrio;Vibrio parahaemolyticus	Vibrio parahaemolyticus	603826	99.66	0.72	Human	Scaffold	ftp://ftp.ncbi.nlm.nih.gov/genomes/all/GCA/001/541/625/GCA_001541625.1_ASM154162v1
Cluster 1	GCA_001542545.1	Bacteria;Pseudomonadota;Gammaproteobacteria;Enterobacterales;Enterobacteriaceae;Escherichia;Escherichia coli	Escherichia coli	258308	99.97	0.2	Animal	Chromosome	ftp://ftp.ncbi.nlm.nih.gov/genomes/all/GCA/001/542/545/GCA_001542545.1_ASM154254v1
Cluster 1	GCA_001542675.2	Bacteria;Pseudomonadota;Gammaproteobacteria;Enterobacterales;Enterobacteriaceae;Escherichia;Escherichia coli	Escherichia coli	4827745	99.55	1.18	Environment	Completed Genome	ftp://ftp.ncbi.nlm.nih.gov/genomes/all/GCA/001/542/675/GCA_001542675.2_ASM154267v2
Cluster 1	GCA_001558515.2	Bacteria;Pseudomonadota;Gammaproteobacteria;Vibrionales;Vibrionaceae;Vibrio;Vibrio vulnificus	Vibrio vulnificus	3236438	99.5	0.91	Human	Completed Genome	ftp://ftp.ncbi.nlm.nih.gov/genomes/all/GCA/001/558/515/GCA_001558515.2_ASM155851v2
Cluster 1	GCA_001558935.2	Bacteria;Pseudomonadota;Gammaproteobacteria;Enterobacterales;Enterobacteriaceae;Citrobacter;Citrobacter amalonaticus	Citrobacter amalonaticus	5030678	99.15	2.64	Human	Completed Genome	ftp://ftp.ncbi.nlm.nih.gov/genomes/all/GCA/001/558/935/GCA_001558935.2_ASM155893v2
Cluster 1	GCA_001559075.2	Bacteria;Pseudomonadota;Gammaproteobacteria;Enterobacterales;Enterobacteriaceae;Citrobacter;Citrobacter amalonaticus	Citrobacter amalonaticus	4904719	99.1	2.96	Human	Completed Genome	ftp://ftp.ncbi.nlm.nih.gov/genomes/all/GCA/001/559/075/GCA_001559075.2_ASM155907v2
Cluster 1	GCA_001562175.1	Bacteria;Pseudomonadota;Gammaproteobacteria;Enterobacterales;Enterobacteriaceae;Enterobacter;Enterobacter cloacae	Enterobacter cloacae	4361074	99.97	0.17	Human	Chromosome	ftp://ftp.ncbi.nlm.nih.gov/genomes/all/GCA/001/562/175/GCA_001562175.1_ASM156217v1
Cluster 1	GCA_001562635.1	Bacteria;Pseudomonadota;Gammaproteobacteria;Enterobacterales;Enterobacteriaceae;Escherichia;Escherichia coli	Escherichia coli	195236	99.97	0.52	Human	Scaffold	ftp://ftp.ncbi.nlm.nih.gov/genomes/all/GCA/001/562/635/GCA_001562635.1_ASM156263v1
Cluster 1	GCA_001572725.1	Bacteria;Pseudomonadota;Gammaproteobacteria;Enterobacterales;Yersiniaceae;Serratia;Serratia rubidaea	Serratia rubidaea	4922834	99.97	0.49	Human	Completed Genome	ftp://ftp.ncbi.nlm.nih.gov/genomes/all/GCA/001/572/725/GCA_001572725.1_ASM157272v1
Cluster 1	GCA_001575935.1	Bacteria;Pseudomonadota;Gammaproteobacteria;Enterobacterales;Enterobacteriaceae;Escherichia;Escherichia coli	Escherichia coli	130002	99.97	0.14	Animal	Scaffold	ftp://ftp.ncbi.nlm.nih.gov/genomes/all/GCA/001/575/935/GCA_001575935.1_ASM157593v1
Cluster 1	GCA_001593245.1	Bacteria;Pseudomonadota;Gammaproteobacteria;Aeromonadales;Aeromonadaceae;Aeromonas;Aeromonas veronii	Aeromonas veronii	4923009	99.02	1.6	Animal	Completed Genome	ftp://ftp.ncbi.nlm.nih.gov/genomes/all/GCA/001/593/245/GCA_001593245.1_ASM159324v1
Cluster 1	GCA_001594375.1	Bacteria;Pseudomonadota;Gammaproteobacteria;Enterobacterales;Enterobacteriaceae;Klebsiella;Klebsiella oxytoca	Klebsiella oxytoca	408616	100	0.51	Human	Scaffold	ftp://ftp.ncbi.nlm.nih.gov/genomes/all/GCA/001/594/375/GCA_001594375.1_ASM159437v1
Cluster 1	GCA_001595405.1	Bacteria;Pseudomonadota;Gammaproteobacteria;Enterobacterales;Enterobacteriaceae;Enterobacter;Enterobacter cloacae	Enterobacter cloacae	3315219	98.99	1.1	Human	Scaffold	ftp://ftp.ncbi.nlm.nih.gov/genomes/all/GCA/001/595/405/GCA_001595405.1_ASM159540v1
Cluster 1	GCA_001597625.1	Bacteria;Pseudomonadota;Gammaproteobacteria;Enterobacterales;Erwiniaceae;Pantoea;Pantoea agglomerans	Pantoea agglomerans	4016073	98.58	0.6	Enironment	Scaffold	ftp://ftp.ncbi.nlm.nih.gov/genomes/all/GCA/001/597/625/GCA_001597625.1_ASM159762v1
Cluster 1	GCA_001606525.1	Bacteria;Pseudomonadota;Gammaproteobacteria;Enterobacterales;Enterobacteriaceae;Escherichia;Escherichia coli	Escherichia coli	158673	99.97	0.04	Human	Scaffold	ftp://ftp.ncbi.nlm.nih.gov/genomes/all/GCA/001/606/525/GCA_001606525.1_ASM160652v1
Cluster 1	GCA_001607515.1	Bacteria;Pseudomonadota;Gammaproteobacteria;Enterobacterales;Enterobacteriaceae;Escherichia;Escherichia coli	Escherichia coli	57646	95.13	0.69	Human	Scaffold	ftp://ftp.ncbi.nlm.nih.gov/genomes/all/GCA/001/607/515/GCA_001607515.1_ASM160751v1
Cluster 1	GCA_001607765.1	Bacteria;Pseudomonadota;Gammaproteobacteria;Enterobacterales;Enterobacteriaceae;Escherichia;Escherichia coli	Escherichia coli	311473	99.97	0.04	Human	Scaffold	ftp://ftp.ncbi.nlm.nih.gov/genomes/all/GCA/001/607/765/GCA_001607765.1_ASM160776v1
Cluster 1	GCA_001608855.1	Bacteria;Pseudomonadota;Gammaproteobacteria;Vibrionales;Vibrionaceae;Vibrio;Vibrio parahaemolyticus	Vibrio parahaemolyticus	509565	98.71	0.79	Human	Scaffold	ftp://ftp.ncbi.nlm.nih.gov/genomes/all/GCA/001/608/855/GCA_001608855.1_ASM160885v1
Cluster 1	GCA_001609055.1	Bacteria;Pseudomonadota;Gammaproteobacteria;Vibrionales;Vibrionaceae;Vibrio;Vibrio parahaemolyticus	Vibrio parahaemolyticus	475179	99.69	1.13	Human	Scaffold	ftp://ftp.ncbi.nlm.nih.gov/genomes/all/GCA/001/609/055/GCA_001609055.1_ASM160905v1
Cluster 1	GCA_001609435.1	Bacteria;Pseudomonadota;Gammaproteobacteria;Vibrionales;Vibrionaceae;Vibrio;Vibrio parahaemolyticus	Vibrio parahaemolyticus	465886	99.61	1	Human	Scaffold	ftp://ftp.ncbi.nlm.nih.gov/genomes/all/GCA/001/609/435/GCA_001609435.1_ASM160943v1
Cluster 1	GCA_001609555.1	Bacteria;Pseudomonadota;Gammaproteobacteria;Vibrionales;Vibrionaceae;Vibrio;Vibrio parahaemolyticus	Vibrio parahaemolyticus	464267	99.78	1.01	Human	Scaffold	ftp://ftp.ncbi.nlm.nih.gov/genomes/all/GCA/001/609/555/GCA_001609555.1_ASM160955v1
Cluster 1	GCA_001614325.1	Bacteria;Pseudomonadota;Gammaproteobacteria;Enterobacterales;Enterobacteriaceae;Escherichia;Escherichia coli	Escherichia coli	56394	99.44	0.6	Animal	Scaffold	ftp://ftp.ncbi.nlm.nih.gov/genomes/all/GCA/001/614/325/GCA_001614325.1_ASM161432v1
Cluster 1	GCA_001615745.1	Bacteria;Pseudomonadota;Gammaproteobacteria;Enterobacterales;Enterobacteriaceae;Escherichia;Escherichia coli	Escherichia coli	84203	99.97	0.06	Animal	Scaffold	ftp://ftp.ncbi.nlm.nih.gov/genomes/all/GCA/001/615/745/GCA_001615745.1_ASM161574v1
Cluster 1	GCA_001616045.1	Bacteria;Pseudomonadota;Gammaproteobacteria;Enterobacterales;Enterobacteriaceae;Escherichia;Escherichia coli	Escherichia coli	129352	99.97	0.04	Animal	Scaffold	ftp://ftp.ncbi.nlm.nih.gov/genomes/all/GCA/001/616/045/GCA_001616045.1_ASM161604v1
Cluster 1	GCA_001617645.1	Bacteria;Pseudomonadota;Gammaproteobacteria;Enterobacterales;Enterobacteriaceae;Enterobacter;Enterobacter asburiae	Enterobacter asburiae	4648696	98.91	0.63	Human	Completed Genome	ftp://ftp.ncbi.nlm.nih.gov/genomes/all/GCA/001/617/645/GCA_001617645.1_ASM161764v1
Cluster 1	GCA_001634015.1	Bacteria;Pseudomonadota;Gammaproteobacteria;Vibrionales;Vibrionaceae;Vibrio;Vibrio parahaemolyticus	Vibrio parahaemolyticus	265563	99.39	0.57	Human	Scaffold	ftp://ftp.ncbi.nlm.nih.gov/genomes/all/GCA/001/634/015/GCA_001634015.1_ASM163401v1
Cluster 1	GCA_001636255.1	Bacteria;Pseudomonadota;Gammaproteobacteria;Enterobacterales;Hafniaceae;Hafnia;Hafnia alvei	Hafnia alvei	4542863	99.17	0.55	Human	Completed Genome	ftp://ftp.ncbi.nlm.nih.gov/genomes/all/GCA/001/636/255/GCA_001636255.1_ASM163625v1
Cluster 1	GCA_001653775.1	Bacteria;Pseudomonadota;Gammaproteobacteria;Vibrionales;Vibrionaceae;Vibrio;Vibrio vulnificus	Vibrio vulnificus	3234424	97.57	1.7	Human	Completed Genome	ftp://ftp.ncbi.nlm.nih.gov/genomes/all/GCA/001/653/775/GCA_001653775.1_ASM165377v1
Cluster 1	GCA_001661985.1	Bacteria;Pseudomonadota;Gammaproteobacteria;Enterobacterales;Erwiniaceae;Pantoea;Pantoea agglomerans	Pantoea agglomerans pv. gypsophilae	332009	100	0.52	Enironment	Scaffold	ftp://ftp.ncbi.nlm.nih.gov/genomes/all/GCA/001/661/985/GCA_001661985.1_ASM166198v1
Cluster 1	GCA_001662025.1	Bacteria;Pseudomonadota;Gammaproteobacteria;Enterobacterales;Erwiniaceae;Pantoea;Pantoea agglomerans	Pantoea agglomerans pv. betae	241030	99.95	0.19	Enironment	Scaffold	ftp://ftp.ncbi.nlm.nih.gov/genomes/all/GCA/001/662/025/GCA_001662025.1_ASM166202v1
Cluster 1	GCA_001663115.1	Bacteria;Pseudomonadota;Gammaproteobacteria;Enterobacterales;Yersiniaceae;Serratia;Serratia plymuthica	Serratia plymuthica	5546041	98.77	0.85	Enironment	Completed Genome	ftp://ftp.ncbi.nlm.nih.gov/genomes/all/GCA/001/663/115/GCA_001663115.1_ASM166311v1
Cluster 1	GCA_001670425.1	Bacteria;Pseudomonadota;Gammaproteobacteria;Pasteurellales;Pasteurellaceae;Pasteurella;Pasteurella multocida	Pasteurella multocida subsp. multocida	358440	99.55	0	Animal	Scaffold	ftp://ftp.ncbi.nlm.nih.gov/genomes/all/GCA/001/670/425/GCA_001670425.1_ASM167042v1
Cluster 1	GCA_001670435.1	Bacteria;Pseudomonadota;Gammaproteobacteria;Pasteurellales;Pasteurellaceae;Pasteurella;Pasteurella multocida	Pasteurella multocida subsp. multocida	525362	99.55	0	Animal	Scaffold	ftp://ftp.ncbi.nlm.nih.gov/genomes/all/GCA/001/670/435/GCA_001670435.1_ASM167043v1
Cluster 1	GCA_001670525.1	Bacteria;Pseudomonadota;Gammaproteobacteria;Pasteurellales;Pasteurellaceae;Pasteurella;Pasteurella multocida	Pasteurella multocida subsp. multocida	532880	99.32	0	Animal	Scaffold	ftp://ftp.ncbi.nlm.nih.gov/genomes/all/GCA/001/670/525/GCA_001670525.1_ASM167052v1
Cluster 1	GCA_001670535.1	Bacteria;Pseudomonadota;Gammaproteobacteria;Pasteurellales;Pasteurellaceae;Pasteurella;Pasteurella multocida	Pasteurella multocida subsp. multocida	538421	99.52	0	Animal	Scaffold	ftp://ftp.ncbi.nlm.nih.gov/genomes/all/GCA/001/670/535/GCA_001670535.1_ASM167053v1
Cluster 1	GCA_001670545.1	Bacteria;Pseudomonadota;Gammaproteobacteria;Pasteurellales;Pasteurellaceae;Pasteurella;Pasteurella multocida	Pasteurella multocida subsp. multocida	529156	99.55	0	Animal	Scaffold	ftp://ftp.ncbi.nlm.nih.gov/genomes/all/GCA/001/670/545/GCA_001670545.1_ASM167054v1
Cluster 1	GCA_001670775.1	Bacteria;Pseudomonadota;Gammaproteobacteria;Pasteurellales;Pasteurellaceae;Pasteurella;Pasteurella multocida	Pasteurella multocida subsp. multocida	615725	99.55	0	Animal	Scaffold	ftp://ftp.ncbi.nlm.nih.gov/genomes/all/GCA/001/670/775/GCA_001670775.1_ASM167077v1
Cluster 1	GCA_001675245.1	Bacteria;Pseudomonadota;Gammaproteobacteria;Vibrionales;Vibrionaceae;Vibrio;Vibrio vulnificus	Vibrio vulnificus	3253417	99.38	1.26	Human	Completed Genome	ftp://ftp.ncbi.nlm.nih.gov/genomes/all/GCA/001/675/245/GCA_001675245.1_ASM167524v1
Cluster 1	GCA_001675835.1	Bacteria;Pseudomonadota;Gammaproteobacteria;Enterobacterales;Enterobacteriaceae;Enterobacter;Enterobacter roggenkampii	Enterobacter roggenkampii	475821	99.33	0.03	Enironment	Scaffold	ftp://ftp.ncbi.nlm.nih.gov/genomes/all/GCA/001/675/835/GCA_001675835.1_CLC_Genomics_Workbench
Cluster 1	GCA_001679045.1	Bacteria;Pseudomonadota;Gammaproteobacteria;Pasteurellales;Pasteurellaceae;Haemophilus;Haemophilus haemolyticus	Haemophilus haemolyticus	216353	97.82	0.03	Human	Scaffold	ftp://ftp.ncbi.nlm.nih.gov/genomes/all/GCA/001/679/045/GCA_001679045.1_ASM167904v1
Cluster 1	GCA_001679235.1	Bacteria;Pseudomonadota;Gammaproteobacteria;Pasteurellales;Pasteurellaceae;Haemophilus;Haemophilus influenzae	Haemophilus influenzae	994158	98.07	0.09	Human	Scaffold	ftp://ftp.ncbi.nlm.nih.gov/genomes/all/GCA/001/679/235/GCA_001679235.1_ASM167923v1
Cluster 1	GCA_001679365.1	Bacteria;Pseudomonadota;Gammaproteobacteria;Pasteurellales;Pasteurellaceae;Haemophilus;Haemophilus influenzae	Haemophilus influenzae	202094	99.44	0.02	Human	Scaffold	ftp://ftp.ncbi.nlm.nih.gov/genomes/all/GCA/001/679/365/GCA_001679365.1_ASM167936v1
Cluster 1	GCA_001679445.1	Bacteria;Pseudomonadota;Gammaproteobacteria;Pasteurellales;Pasteurellaceae;Haemophilus;Haemophilus haemolyticus	Haemophilus haemolyticus	271730	96.95	1.57	Human	Scaffold	ftp://ftp.ncbi.nlm.nih.gov/genomes/all/GCA/001/679/445/GCA_001679445.1_ASM167944v1
Cluster 1	GCA_001679745.1	Bacteria;Pseudomonadota;Gammaproteobacteria;Vibrionales;Vibrionaceae;Vibrio;Vibrio alginolyticus	Vibrio alginolyticus	3535128	98.82	1.23	Animal	Completed Genome	ftp://ftp.ncbi.nlm.nih.gov/genomes/all/GCA/001/679/745/GCA_001679745.1_ASM167974v1
Cluster 1	GCA_001687125.1	Bacteria;Pseudomonadota;Gammaproteobacteria;Aeromonadales;Aeromonadaceae;Aeromonas;Aeromonas hydrophila	Aeromonas hydrophila	4906118	97.63	1.76	Human	Completed Genome	ftp://ftp.ncbi.nlm.nih.gov/genomes/all/GCA/001/687/125/GCA_001687125.1_ASM168712v1
Cluster 1	GCA_001702455.1	Bacteria;Pseudomonadota;Gammaproteobacteria;Enterobacterales;Enterobacteriaceae;Citrobacter;Citrobacter freundii	Citrobacter freundii	5134500	99.9	0.86	Human	Completed Genome	ftp://ftp.ncbi.nlm.nih.gov/genomes/all/GCA/001/702/455/GCA_001702455.1_ASM170245v1
Cluster 1	GCA_001704235.1	Bacteria;Pseudomonadota;Gammaproteobacteria;Enterobacterales;Enterobacteriaceae;Klebsiella;Klebsiella pneumoniae	Klebsiella pneumoniae	5184828	99.7	0.78	Human	Completed Genome	ftp://ftp.ncbi.nlm.nih.gov/genomes/all/GCA/001/704/235/GCA_001704235.1_ASM170423v1
Cluster 1	GCA_001718055.1	Bacteria;Pseudomonadota;Gammaproteobacteria;Enterobacterales;Enterobacteriaceae;Citrobacter;Citrobacter freundii	Citrobacter freundii	5096586	98.47	4.09	Human	Completed Genome	ftp://ftp.ncbi.nlm.nih.gov/genomes/all/GCA/001/718/055/GCA_001718055.1_ASM171805v1
Cluster 1	GCA_001718105.1	Bacteria;Pseudomonadota;Gammaproteobacteria;Vibrionales;Vibrionaceae;Vibrio;Vibrio cholerae	Vibrio cholerae	388820	99.98	0.08	Animal	Scaffold	ftp://ftp.ncbi.nlm.nih.gov/genomes/all/GCA/001/718/105/GCA_001718105.1_ASM171810v1
Cluster 1	GCA_001729705.1	Bacteria;Pseudomonadota;Gammaproteobacteria;Enterobacterales;Enterobacteriaceae;Enterobacter;Enterobacter hormaechei	Enterobacter hormaechei subsp. oharae	4724316	99.95	0.48	Human	Completed Genome	ftp://ftp.ncbi.nlm.nih.gov/genomes/all/GCA/001/729/705/GCA_001729705.1_ASM172970v1
Cluster 1	GCA_001729805.1	Bacteria;Pseudomonadota;Gammaproteobacteria;Enterobacterales;Enterobacteriaceae;Enterobacter;Enterobacter roggenkampii	Enterobacter roggenkampii	4748414	99.34	0.08	Human	Completed Genome	ftp://ftp.ncbi.nlm.nih.gov/genomes/all/GCA/001/729/805/GCA_001729805.1_ASM172980v1
Cluster 1	GCA_001730205.1	Bacteria;Pseudomonadota;Gammaproteobacteria;Aeromonadales;Aeromonadaceae;Aeromonas;Aeromonas caviae	Aeromonas caviae	103034	98.27	0.52	Animal	Scaffold	ftp://ftp.ncbi.nlm.nih.gov/genomes/all/GCA/001/730/205/GCA_001730205.1_ASM173020v1
Cluster 1	GCA_001735565.1	Bacteria;Pseudomonadota;Gammaproteobacteria;Vibrionales;Vibrionaceae;Vibrio;Vibrio cholerae	Vibrio cholerae	120013	99.96	0.1	Environment	Scaffold	ftp://ftp.ncbi.nlm.nih.gov/genomes/all/GCA/001/735/565/GCA_001735565.1_ASM173556v1
Cluster 1	GCA_001735605.1	Bacteria;Pseudomonadota;Gammaproteobacteria;Enterobacterales;Enterobacteriaceae;Cronobacter;Cronobacter sakazakii	Cronobacter sakazakii	284013	99.69	0.43	Human	Scaffold	ftp://ftp.ncbi.nlm.nih.gov/genomes/all/GCA/001/735/605/GCA_001735605.1_ASM173560v1
Cluster 1	GCA_001747365.2	Bacteria;Pseudomonadota;Gammaproteobacteria;Enterobacterales;Enterobacteriaceae;Escherichia;Escherichia coli	Escherichia coli	83916	99.97	1.03	Animal	Scaffold	ftp://ftp.ncbi.nlm.nih.gov/genomes/all/GCA/001/747/365/GCA_001747365.2_ASM174736v2
Cluster 1	GCA_001750725.1	Bacteria;Pseudomonadota;Gammaproteobacteria;Enterobacterales;Enterobacteriaceae;Enterobacter;Enterobacter ludwigii	Enterobacter ludwigii	4857439	98.9	0.3	Human	Completed Genome	ftp://ftp.ncbi.nlm.nih.gov/genomes/all/GCA/001/750/725/GCA_001750725.1_ASM175072v1
Cluster 1	GCA_001758605.1	Bacteria;Pseudomonadota;Gammaproteobacteria;Vibrionales;Vibrionaceae;Vibrio;Vibrio parahaemolyticus	Vibrio parahaemolyticus	3253462	98.63	0.96	Human	Completed Genome	ftp://ftp.ncbi.nlm.nih.gov/genomes/all/GCA/001/758/605/GCA_001758605.1_ASM175860v1
Cluster 1	GCA_001858225.1	Bacteria;Pseudomonadota;Gammaproteobacteria;Aeromonadales;Aeromonadaceae;Aeromonas;Aeromonas sobria	Aeromonas sobria	168611	98.36	1.12	Animal	Scaffold	ftp://ftp.ncbi.nlm.nih.gov/genomes/all/GCA/001/858/225/GCA_001858225.1_ASM185822v1
Cluster 1	GCA_001865895.1	Bacteria;Pseudomonadota;Gammaproteobacteria;Enterobacterales;Enterobacteriaceae;Escherichia;Escherichia coli	Escherichia coli	4038608	98.36	0.97	Human	Scaffold	ftp://ftp.ncbi.nlm.nih.gov/genomes/all/GCA/001/865/895/GCA_001865895.1_ASM186589v1
Cluster 1	GCA_001890645.1	Bacteria;Pseudomonadota;Gammaproteobacteria;Vibrionales;Vibrionaceae;Vibrio;Vibrio vulnificus	Vibrio vulnificus	163286	95.18	2.33	Animal	Scaffold	ftp://ftp.ncbi.nlm.nih.gov/genomes/all/GCA/001/890/645/GCA_001890645.1_ASM189064v1
Cluster 1	GCA_001891535.1	Bacteria;Pseudomonadota;Gammaproteobacteria;Enterobacterales;Enterobacteriaceae;Escherichia;Escherichia coli	Escherichia coli	88430	99.62	1.19	Animal	Scaffold	ftp://ftp.ncbi.nlm.nih.gov/genomes/all/GCA/001/891/535/GCA_001891535.1_ASM189153v1
Cluster 1	GCA_001891785.1	Bacteria;Pseudomonadota;Gammaproteobacteria;Enterobacterales;Enterobacteriaceae;Escherichia;Escherichia coli	Escherichia coli	151063	99.97	0.73	Animal	Scaffold	ftp://ftp.ncbi.nlm.nih.gov/genomes/all/GCA/001/891/785/GCA_001891785.1_ASM189178v1
Cluster 1	GCA_001892765.1	Bacteria;Pseudomonadota;Gammaproteobacteria;Enterobacterales;Enterobacteriaceae;Escherichia;Escherichia coli	Escherichia coli	103599	99.97	0.88	Animal	Scaffold	ftp://ftp.ncbi.nlm.nih.gov/genomes/all/GCA/001/892/765/GCA_001892765.1_ASM189276v1
Cluster 1	GCA_001893845.1	Bacteria;Pseudomonadota;Gammaproteobacteria;Enterobacterales;Enterobacteriaceae;Escherichia;Escherichia coli	Escherichia coli	169887	99.97	0.04	Animal	Scaffold	ftp://ftp.ncbi.nlm.nih.gov/genomes/all/GCA/001/893/845/GCA_001893845.1_ASM189384v1
Cluster 1	GCA_001895965.1	Bacteria;Pseudomonadota;Gammaproteobacteria;Aeromonadales;Aeromonadaceae;Aeromonas;Aeromonas hydrophila	Aeromonas hydrophila	4783504	97.85	2.67	Environment	Completed Genome	ftp://ftp.ncbi.nlm.nih.gov/genomes/all/GCA/001/895/965/GCA_001895965.1_ASM189596v1
Cluster 1	GCA_001900535.1	Bacteria;Pseudomonadota;Gammaproteobacteria;Enterobacterales;Enterobacteriaceae;Escherichia;Escherichia coli	Escherichia coli	5333488	99.62	0.22	Animal	Completed Genome	ftp://ftp.ncbi.nlm.nih.gov/genomes/all/GCA/001/900/535/GCA_001900535.1_ASM190053v1
Cluster 1	GCA_001908515.1	Bacteria;Pseudomonadota;Gammaproteobacteria;Enterobacterales;Enterobacteriaceae;Klebsiella;Klebsiella pneumoniae	Klebsiella pneumoniae	5424949	98.52	1.95	Human	Completed Genome	ftp://ftp.ncbi.nlm.nih.gov/genomes/all/GCA/001/908/515/GCA_001908515.1_ASM190851v1
Cluster 1	GCA_001908955.1	Bacteria;Pseudomonadota;Gammaproteobacteria;Pasteurellales;Pasteurellaceae;Haemophilus;Haemophilus influenzae	Haemophilus influenzae	69761	98.1	0.02	Human	Scaffold	ftp://ftp.ncbi.nlm.nih.gov/genomes/all/GCA/001/908/955/GCA_001908955.1_ASM190895v1
Cluster 1	GCA_001909015.1	Bacteria;Pseudomonadota;Gammaproteobacteria;Pasteurellales;Pasteurellaceae;Haemophilus;Haemophilus influenzae	Haemophilus influenzae	85537	99.34	0.16	Human	Scaffold	ftp://ftp.ncbi.nlm.nih.gov/genomes/all/GCA/001/909/015/GCA_001909015.1_ASM190901v1
Cluster 1	GCA_001909165.1	Bacteria;Pseudomonadota;Gammaproteobacteria;Enterobacterales;Yersiniaceae;Serratia;Serratia marcescens	Serratia marcescens	434703	99.81	0	Human	Scaffold	ftp://ftp.ncbi.nlm.nih.gov/genomes/all/GCA/001/909/165/GCA_001909165.1_ASM190916v1
Cluster 1	GCA_001931885.1	Bacteria;Pseudomonadota;Gammaproteobacteria;Enterobacterales;Enterobacteriaceae;Citrobacter;Citrobacter koseri	Citrobacter koseri	4752495	99.88	0.88	Human	Completed Genome	ftp://ftp.ncbi.nlm.nih.gov/genomes/all/GCA/001/931/885/GCA_001931885.1_ASM193188v1
Cluster 1	GCA_001940295.1	Bacteria;Pseudomonadota;Gammaproteobacteria;Enterobacterales;Enterobacteriaceae;Enterobacter;Enterobacter kobei	Enterobacter kobei	2901642	98.42	0.28	Human	Scaffold	ftp://ftp.ncbi.nlm.nih.gov/genomes/all/GCA/001/940/295/GCA_001940295.1_ASM194029v1
Cluster 1	GCA_001949825.1	Bacteria;Pseudomonadota;Gammaproteobacteria;Pasteurellales;Pasteurellaceae;Haemophilus;Haemophilus influenzae	Haemophilus influenzae	411437	99.42	0.02	Human	Scaffold	ftp://ftp.ncbi.nlm.nih.gov/genomes/all/GCA/001/949/825/GCA_001949825.1_ASM194982v1
Cluster 1	GCA_001949855.1	Bacteria;Pseudomonadota;Gammaproteobacteria;Pasteurellales;Pasteurellaceae;Haemophilus;Haemophilus influenzae	Haemophilus influenzae	999389	99.54	0.09	Human	Scaffold	ftp://ftp.ncbi.nlm.nih.gov/genomes/all/GCA/001/949/855/GCA_001949855.1_ASM194985v1
Cluster 1	GCA_001994955.1	Bacteria;Pseudomonadota;Gammaproteobacteria;Enterobacterales;Enterobacteriaceae;Escherichia;Escherichia coli	Escherichia coli	104497	99.62	0.76	Animal	Scaffold	ftp://ftp.ncbi.nlm.nih.gov/genomes/all/GCA/001/994/955/GCA_001994955.1_ASM199495v1
Cluster 1	GCA_002007805.1	Bacteria;Pseudomonadota;Gammaproteobacteria;Enterobacterales;Enterobacteriaceae;Enterobacter;Enterobacter roggenkampii	Enterobacter roggenkampii	4812230	99.46	0.41	Environment	Completed Genome	ftp://ftp.ncbi.nlm.nih.gov/genomes/all/GCA/002/007/805/GCA_002007805.1_ASM200780v1
Cluster 1	GCA_002015035.1	Bacteria;Pseudomonadota;Gammaproteobacteria;Pasteurellales;Pasteurellaceae;Haemophilus;Haemophilus parahaemolyticus	Haemophilus parahaemolyticus	100981	99.36	0.1	Human	Scaffold	ftp://ftp.ncbi.nlm.nih.gov/genomes/all/GCA/002/015/035/GCA_002015035.1_ASM201503v1
Cluster 1	GCA_002015045.1	Bacteria;Pseudomonadota;Gammaproteobacteria;Pasteurellales;Pasteurellaceae;Haemophilus;Haemophilus paraphrohaemolyticus	Haemophilus paraphrohaemolyticus	181695	99.36	0.11	Human	Scaffold	ftp://ftp.ncbi.nlm.nih.gov/genomes/all/GCA/002/015/045/GCA_002015045.1_ASM201504v1
Cluster 1	GCA_002023805.1	Bacteria;Pseudomonadota;Gammaproteobacteria;Pasteurellales;Pasteurellaceae;Pasteurella;Pasteurella multocida	Pasteurella multocida subsp. multocida	190835	99.52	0	Animal	Scaffold	ftp://ftp.ncbi.nlm.nih.gov/genomes/all/GCA/002/023/805/GCA_002023805.1_ASM202380v1
Cluster 1	GCA_002023835.1	Bacteria;Pseudomonadota;Gammaproteobacteria;Pasteurellales;Pasteurellaceae;Pasteurella;Pasteurella multocida	Pasteurella multocida subsp. septica	333581	99.52	0	Animal	Scaffold	ftp://ftp.ncbi.nlm.nih.gov/genomes/all/GCA/002/023/835/GCA_002023835.1_ASM202383v1
Cluster 1	GCA_002025685.1	Bacteria;Pseudomonadota;Gammaproteobacteria;Enterobacterales;Enterobacteriaceae;Enterobacter;Enterobacter ludwigii	Enterobacter ludwigii	4799256	99.61	0.03	Enironment	Completed Genome	ftp://ftp.ncbi.nlm.nih.gov/genomes/all/GCA/002/025/685/GCA_002025685.1_ASM202568v1
Cluster 1	GCA_002071755.1	Bacteria;Pseudomonadota;Gammaproteobacteria;Enterobacterales;Enterobacteriaceae;Cronobacter;Cronobacter sakazakii	Cronobacter sakazakii	347309	99.69	0.47	Environment	Scaffold	ftp://ftp.ncbi.nlm.nih.gov/genomes/all/GCA/002/071/755/GCA_002071755.1_ASM207175v1
Cluster 1	GCA_002073255.2	Bacteria;Pseudomonadota;Gammaproteobacteria;Pasteurellales;Pasteurellaceae;Pasteurella;Pasteurella multocida	Pasteurella multocida	2331774	99.55	0	Environment	Completed Genome	ftp://ftp.ncbi.nlm.nih.gov/genomes/all/GCA/002/073/255/GCA_002073255.2_ASM207325v2
Cluster 1	GCA_002073475.2	Bacteria;Pseudomonadota;Gammaproteobacteria;Pasteurellales;Pasteurellaceae;Haemophilus;Haemophilus influenzae	Haemophilus influenzae	1830681	99.44	0.02	Human	Completed Genome	ftp://ftp.ncbi.nlm.nih.gov/genomes/all/GCA/002/073/475/GCA_002073475.2_ASM207347v2
Cluster 1	GCA_002087635.1	Bacteria;Pseudomonadota;Gammaproteobacteria;Enterobacterales;Enterobacteriaceae;Escherichia;Escherichia coli	Escherichia coli	415031	99.67	0.26	Human	Scaffold	ftp://ftp.ncbi.nlm.nih.gov/genomes/all/GCA/002/087/635/GCA_002087635.1_ASM208763v1
Cluster 1	GCA_002093135.1	Bacteria;Pseudomonadota;Gammaproteobacteria;Aeromonadales;Aeromonadaceae;Aeromonas;Aeromonas hydrophila	Aeromonas hydrophila	184794	98.51	0.58	Animal	Scaffold	ftp://ftp.ncbi.nlm.nih.gov/genomes/all/GCA/002/093/135/GCA_002093135.1_ASM209313v1
Cluster 1	GCA_002093915.1	Bacteria;Pseudomonadota;Gammaproteobacteria;Enterobacterales;Enterobacteriaceae;Cronobacter;Cronobacter malonaticus	Cronobacter malonaticus	506317	98.87	2.78	Human	Scaffold	ftp://ftp.ncbi.nlm.nih.gov/genomes/all/GCA/002/093/915/GCA_002093915.1_ASM209391v1
Cluster 1	GCA_002102635.1	Bacteria;Pseudomonadota;Gammaproteobacteria;Enterobacterales;Enterobacteriaceae;Klebsiella;Klebsiella pneumoniae	Klebsiella pneumoniae	251687	98.98	1.27	Human	Scaffold	ftp://ftp.ncbi.nlm.nih.gov/genomes/all/GCA/002/102/635/GCA_002102635.1_ASM210263v1
Cluster 1	GCA_002119505.2	Bacteria;Pseudomonadota;Gammaproteobacteria;Vibrionales;Vibrionaceae;Vibrio;Vibrio alginolyticus	Vibrio alginolyticus	3468303	99.52	2.45	Animal	Completed Genome	ftp://ftp.ncbi.nlm.nih.gov/genomes/all/GCA/002/119/505/GCA_002119505.2_ASM211950v2
Cluster 1	GCA_002119525.1	Bacteria;Pseudomonadota;Gammaproteobacteria;Vibrionales;Vibrionaceae;Vibrio;Vibrio syngnathi	Vibrio alginolyticus	3298328	99.96	1.56	Animal	Completed Genome	ftp://ftp.ncbi.nlm.nih.gov/genomes/all/GCA/002/119/525/GCA_002119525.1_ASM211952v1
Cluster 1	GCA_002144135.1	Bacteria;Pseudomonadota;Gammaproteobacteria;Enterobacterales;Enterobacteriaceae;Escherichia;Escherichia coli	Escherichia coli	126385	99.62	0.1	Human	Scaffold	ftp://ftp.ncbi.nlm.nih.gov/genomes/all/GCA/002/144/135/GCA_002144135.1_ASM214413v1
Cluster 1	GCA_002151695.1	Bacteria;Pseudomonadota;Gammaproteobacteria;Enterobacterales;Enterobacteriaceae;Citrobacter;Citrobacter amalonaticus	Citrobacter amalonaticus	391101	99.07	2.15	Human	Scaffold	ftp://ftp.ncbi.nlm.nih.gov/genomes/all/GCA/002/151/695/GCA_002151695.1_ASM215169v1
Cluster 1	GCA_002151735.1	Bacteria;Pseudomonadota;Gammaproteobacteria;Enterobacterales;Enterobacteriaceae;Citrobacter;Citrobacter freundii	Citrobacter freundii	218058	98.03	2.02	Human	Scaffold	ftp://ftp.ncbi.nlm.nih.gov/genomes/all/GCA/002/151/735/GCA_002151735.1_ASM215173v1
Cluster 1	GCA_002151755.1	Bacteria;Pseudomonadota;Gammaproteobacteria;Enterobacterales;Enterobacteriaceae;Citrobacter;Citrobacter freundii	Citrobacter freundii	260369	96.06	4.35	Human	Scaffold	ftp://ftp.ncbi.nlm.nih.gov/genomes/all/GCA/002/151/755/GCA_002151755.1_ASM215175v1
Cluster 1	GCA_002151875.1	Bacteria;Pseudomonadota;Gammaproteobacteria;Enterobacterales;Enterobacteriaceae;Enterobacter;Enterobacter ludwigii	Enterobacter ludwigii	233137	99.26	0.03	Human	Scaffold	ftp://ftp.ncbi.nlm.nih.gov/genomes/all/GCA/002/151/875/GCA_002151875.1_ASM215187v1
Cluster 1	GCA_002152055.1	Bacteria;Pseudomonadota;Gammaproteobacteria;Enterobacterales;Enterobacteriaceae;Enterobacter;Enterobacter cloacae	Enterobacter cloacae	381779	99.97	0.2	Human	Scaffold	ftp://ftp.ncbi.nlm.nih.gov/genomes/all/GCA/002/152/055/GCA_002152055.1_ASM215205v1
Cluster 1	GCA_002152925.1	Bacteria;Pseudomonadota;Gammaproteobacteria;Enterobacterales;Enterobacteriaceae;Klebsiella;Klebsiella aerogenes	Klebsiella aerogenes	253248	99.7	0.04	Human	Scaffold	ftp://ftp.ncbi.nlm.nih.gov/genomes/all/GCA/002/152/925/GCA_002152925.1_ASM215292v1
Cluster 1	GCA_002153355.1	Bacteria;Pseudomonadota;Gammaproteobacteria;Enterobacterales;Yersiniaceae;Serratia;Serratia marcescens	Serratia marcescens	149903	99.81	0.54	Human	Scaffold	ftp://ftp.ncbi.nlm.nih.gov/genomes/all/GCA/002/153/355/GCA_002153355.1_ASM215335v1
Cluster 1	GCA_002154015.1	Bacteria;Pseudomonadota;Gammaproteobacteria;Vibrionales;Vibrionaceae;Vibrio;Vibrio parahaemolyticus	Vibrio parahaemolyticus	409543	98.53	1.41	Animal	Scaffold	ftp://ftp.ncbi.nlm.nih.gov/genomes/all/GCA/002/154/015/GCA_002154015.1_ASM215401v1
Cluster 1	GCA_002165505.1	Bacteria;Pseudomonadota;Gammaproteobacteria;Enterobacterales;Enterobacteriaceae;Enterobacter;Enterobacter kobei	Enterobacter kobei	292831	99.7	0.55	Human	Scaffold	ftp://ftp.ncbi.nlm.nih.gov/genomes/all/GCA/002/165/505/GCA_002165505.1_ASM216550v1
Cluster 1	GCA_002197345.1	Bacteria;Pseudomonadota;Gammaproteobacteria;Enterobacterales;Enterobacteriaceae;Enterobacter;Enterobacter cloacae	Enterobacter cloacae	5090134	98.78	0.76	Human	Completed Genome	ftp://ftp.ncbi.nlm.nih.gov/genomes/all/GCA/002/197/345/GCA_002197345.1_ASM219734v1
Cluster 1	GCA_002205475.1	Bacteria;Pseudomonadota;Gammaproteobacteria;Enterobacterales;Yersiniaceae;Serratia;Serratia marcescens	Serratia marcescens	119928	99.83	0	Environment	Chromosome	ftp://ftp.ncbi.nlm.nih.gov/genomes/all/GCA/002/205/475/GCA_002205475.1_ASM220547v1
Cluster 1	GCA_002206785.1	Bacteria;Pseudomonadota;Gammaproteobacteria;Enterobacterales;Enterobacteriaceae;Escherichia;Escherichia coli	Escherichia coli	73029	99.64	0.48	Human	Scaffold	ftp://ftp.ncbi.nlm.nih.gov/genomes/all/GCA/002/206/785/GCA_002206785.1_ASM220678v1
Cluster 1	GCA_002207125.1	Bacteria;Pseudomonadota;Gammaproteobacteria;Enterobacterales;Enterobacteriaceae;Escherichia;Escherichia coli	Escherichia coli	415054	99.46	0.74	Human	Scaffold	ftp://ftp.ncbi.nlm.nih.gov/genomes/all/GCA/002/207/125/GCA_002207125.1_ASM220712v1
Cluster 1	GCA_002208985.3	Bacteria;Pseudomonadota;Gammaproteobacteria;Enterobacterales;Enterobacteriaceae;Citrobacter;Citrobacter koseri	Citrobacter koseri	4925369	99.82	0.41	Human	Completed Genome	ftp://ftp.ncbi.nlm.nih.gov/genomes/all/GCA/002/208/985/GCA_002208985.3_ASM220898v3
Cluster 1	GCA_002209725.2	Bacteria;Pseudomonadota;Gammaproteobacteria;Vibrionales;Vibrionaceae;Vibrio;Vibrio parahaemolyticus	Vibrio parahaemolyticus	3369175	99.74	0.73	Human	Completed Genome	ftp://ftp.ncbi.nlm.nih.gov/genomes/all/GCA/002/209/725/GCA_002209725.2_ASM220972v2
Cluster 1	GCA_002211705.1	Bacteria;Pseudomonadota;Gammaproteobacteria;Enterobacterales;Enterobacteriaceae;Citrobacter;Citrobacter freundii	Citrobacter freundii	5242839	99.9	0.64	Environment	Completed Genome	ftp://ftp.ncbi.nlm.nih.gov/genomes/all/GCA/002/211/705/GCA_002211705.1_ASM221170v1
Cluster 1	GCA_002214865.1	Bacteria;Pseudomonadota;Gammaproteobacteria;Aeromonadales;Aeromonadaceae;Aeromonas;Aeromonas veronii	Aeromonas veronii	165894	99.03	1.07	Environment	Scaffold	ftp://ftp.ncbi.nlm.nih.gov/genomes/all/GCA/002/214/865/GCA_002214865.1_ASM221486v1
Cluster 1	GCA_002220675.1	Bacteria;Pseudomonadota;Gammaproteobacteria;Enterobacterales;Yersiniaceae;Serratia;Serratia marcescens	Serratia marcescens	5192910	99.86	0	Human	Completed Genome	ftp://ftp.ncbi.nlm.nih.gov/genomes/all/GCA/002/220/675/GCA_002220675.1_ASM222067v1
Cluster 1	GCA_002222515.1	Bacteria;Pseudomonadota;Gammaproteobacteria;Enterobacterales;Erwiniaceae;Pantoea;Pantoea agglomerans	Pantoea agglomerans	473475	98.46	0.45	Environment	Scaffold	ftp://ftp.ncbi.nlm.nih.gov/genomes/all/GCA/002/222/515/GCA_002222515.1_ASM222251v1
Cluster 1	GCA_002224165.1	Bacteria;Pseudomonadota;Gammaproteobacteria;Enterobacterales;Enterobacteriaceae;Enterobacter;Enterobacter mori	Enterobacter mori	86101	98.98	0.48	Human	Scaffold	ftp://ftp.ncbi.nlm.nih.gov/genomes/all/GCA/002/224/165/GCA_002224165.1_ASM222416v1
Cluster 1	GCA_002237715.1	Bacteria;Pseudomonadota;Gammaproteobacteria;Pasteurellales;Pasteurellaceae;Haemophilus;Haemophilus influenzae	Haemophilus influenzae	137750	98.05	0.08	Human	Scaffold	ftp://ftp.ncbi.nlm.nih.gov/genomes/all/GCA/002/237/715/GCA_002237715.1_ASM223771v1
Cluster 1	GCA_002239605.1	Bacteria;Pseudomonadota;Gammaproteobacteria;Enterobacterales;Enterobacteriaceae;Citrobacter;Citrobacter braakii	Citrobacter braakii	140613	99.97	1.92	Environment	Scaffold	ftp://ftp.ncbi.nlm.nih.gov/genomes/all/GCA/002/239/605/GCA_002239605.1_ASM223960v1
Cluster 1	GCA_002249995.1	Bacteria;Pseudomonadota;Gammaproteobacteria;Enterobacterales;Enterobacteriaceae;Citrobacter;Citrobacter farmeri	Citrobacter farmeri	5130228	99.97	0.9	Human	Completed Genome	ftp://ftp.ncbi.nlm.nih.gov/genomes/all/GCA/002/249/995/GCA_002249995.1_ASM224999v1
Cluster 1	GCA_002266365.1	Bacteria;Pseudomonadota;Gammaproteobacteria;Enterobacterales;Enterobacteriaceae;Enterobacter;Enterobacter roggenkampii	Enterobacter roggenkampii	208775	99.6	0.03	Human	Scaffold	ftp://ftp.ncbi.nlm.nih.gov/genomes/all/GCA/002/266/365/GCA_002266365.1_ASM226636v1
Cluster 1	GCA_002266385.1	Bacteria;Pseudomonadota;Gammaproteobacteria;Enterobacterales;Enterobacteriaceae;Enterobacter;Enterobacter cloacae	Enterobacter cloacae	174638	99.7	0.06	Human	Scaffold	ftp://ftp.ncbi.nlm.nih.gov/genomes/all/GCA/002/266/385/GCA_002266385.1_ASM226638v1
Cluster 1	GCA_002266405.1	Bacteria;Pseudomonadota;Gammaproteobacteria;Enterobacterales;Enterobacteriaceae;Enterobacter;Enterobacter cloacae	Enterobacter cloacae	203114	98.78	0.68	Human	Scaffold	ftp://ftp.ncbi.nlm.nih.gov/genomes/all/GCA/002/266/405/GCA_002266405.1_ASM226640v1
Cluster 1	GCA_002278155.1	Bacteria;Pseudomonadota;Gammaproteobacteria;Enterobacterales;Enterobacteriaceae;Enterobacter;Enterobacter cloacae	Enterobacter cloacae	295626	99.24	0.45	Human	Scaffold	ftp://ftp.ncbi.nlm.nih.gov/genomes/all/GCA/002/278/155/GCA_002278155.1_ASM227815v1
Cluster 1	GCA_002278165.1	Bacteria;Pseudomonadota;Gammaproteobacteria;Enterobacterales;Enterobacteriaceae;Enterobacter;Enterobacter cloacae	Enterobacter cloacae	190606	99.97	0.06	Human	Scaffold	ftp://ftp.ncbi.nlm.nih.gov/genomes/all/GCA/002/278/165/GCA_002278165.1_ASM227816v1
Cluster 1	GCA_002278205.1	Bacteria;Pseudomonadota;Gammaproteobacteria;Enterobacterales;Enterobacteriaceae;Enterobacter;Enterobacter cloacae	Enterobacter cloacae	201582	98.78	0.68	Human	Scaffold	ftp://ftp.ncbi.nlm.nih.gov/genomes/all/GCA/002/278/205/GCA_002278205.1_ASM227820v1
Cluster 1	GCA_002278235.1	Bacteria;Pseudomonadota;Gammaproteobacteria;Enterobacterales;Enterobacteriaceae;Enterobacter;Enterobacter cloacae	Enterobacter cloacae	295717	98.9	0.53	Human	Scaffold	ftp://ftp.ncbi.nlm.nih.gov/genomes/all/GCA/002/278/235/GCA_002278235.1_ASM227823v1
Cluster 1	GCA_002278245.1	Bacteria;Pseudomonadota;Gammaproteobacteria;Enterobacterales;Enterobacteriaceae;Enterobacter;Enterobacter cloacae	Enterobacter cloacae	212690	98.78	0.33	Human	Scaffold	ftp://ftp.ncbi.nlm.nih.gov/genomes/all/GCA/002/278/245/GCA_002278245.1_ASM227824v1
Cluster 1	GCA_002278305.1	Bacteria;Pseudomonadota;Gammaproteobacteria;Enterobacterales;Enterobacteriaceae;Enterobacter;Enterobacter cloacae	Enterobacter cloacae	353015	98.78	0.38	Human	Scaffold	ftp://ftp.ncbi.nlm.nih.gov/genomes/all/GCA/002/278/305/GCA_002278305.1_ASM227830v1
Cluster 1	GCA_002278335.1	Bacteria;Pseudomonadota;Gammaproteobacteria;Enterobacterales;Enterobacteriaceae;Enterobacter;Enterobacter roggenkampii	Enterobacter roggenkampii	244862	99.5	0.03	Human	Scaffold	ftp://ftp.ncbi.nlm.nih.gov/genomes/all/GCA/002/278/335/GCA_002278335.1_ASM227833v1
Cluster 1	GCA_002278355.1	Bacteria;Pseudomonadota;Gammaproteobacteria;Enterobacterales;Enterobacteriaceae;Enterobacter;Enterobacter cloacae	Enterobacter cloacae	225960	99.93	0.06	Human	Scaffold	ftp://ftp.ncbi.nlm.nih.gov/genomes/all/GCA/002/278/355/GCA_002278355.1_ASM227835v1
Cluster 1	GCA_002278385.1	Bacteria;Pseudomonadota;Gammaproteobacteria;Enterobacterales;Enterobacteriaceae;Enterobacter;Enterobacter roggenkampii	Enterobacter roggenkampii	263320	99.33	0.49	Human	Scaffold	ftp://ftp.ncbi.nlm.nih.gov/genomes/all/GCA/002/278/385/GCA_002278385.1_ASM227838v1
Cluster 1	GCA_002284185.1	Bacteria;Pseudomonadota;Gammaproteobacteria;Vibrionales;Vibrionaceae;Vibrio;Vibrio cholerae	Vibrio cholerae	143218	99.99	0.17	Environment	Scaffold	ftp://ftp.ncbi.nlm.nih.gov/genomes/all/GCA/002/284/185/GCA_002284185.1_ASM228418v1
Cluster 1	GCA_002284205.1	Bacteria;Pseudomonadota;Gammaproteobacteria;Vibrionales;Vibrionaceae;Vibrio;Vibrio cholerae	Vibrio cholerae	54485	99.96	1.36	Environment	Scaffold	ftp://ftp.ncbi.nlm.nih.gov/genomes/all/GCA/002/284/205/GCA_002284205.1_ASM228420v1
Cluster 1	GCA_002284325.1	Bacteria;Pseudomonadota;Gammaproteobacteria;Vibrionales;Vibrionaceae;Vibrio;Vibrio cholerae	Vibrio cholerae	246196	99.98	0.05	Environment	Scaffold	ftp://ftp.ncbi.nlm.nih.gov/genomes/all/GCA/002/284/325/GCA_002284325.1_ASM228432v1
Cluster 1	GCA_002284395.1	Bacteria;Pseudomonadota;Gammaproteobacteria;Vibrionales;Vibrionaceae;Vibrio;Vibrio cholerae	Vibrio cholerae	174738	99.98	0.19	Environment	Scaffold	ftp://ftp.ncbi.nlm.nih.gov/genomes/all/GCA/002/284/395/GCA_002284395.1_ASM228439v1
Cluster 1	GCA_002284425.1	Bacteria;Pseudomonadota;Gammaproteobacteria;Vibrionales;Vibrionaceae;Vibrio;Vibrio cholerae	Vibrio cholerae	71205	99.98	0.38	Environment	Scaffold	ftp://ftp.ncbi.nlm.nih.gov/genomes/all/GCA/002/284/425/GCA_002284425.1_ASM228442v1
Cluster 1	GCA_002284475.1	Bacteria;Pseudomonadota;Gammaproteobacteria;Vibrionales;Vibrionaceae;Vibrio;Vibrio cholerae	Vibrio cholerae	210940	99.35	1.34	Environment	Scaffold	ftp://ftp.ncbi.nlm.nih.gov/genomes/all/GCA/002/284/475/GCA_002284475.1_ASM228447v1
Cluster 1	GCA_002284495.1	Bacteria;Pseudomonadota;Gammaproteobacteria;Vibrionales;Vibrionaceae;Vibrio;Vibrio cholerae	Vibrio cholerae	119133	98.07	2.12	Environment	Scaffold	ftp://ftp.ncbi.nlm.nih.gov/genomes/all/GCA/002/284/495/GCA_002284495.1_ASM228449v1
Cluster 1	GCA_002285935.1	Bacteria;Pseudomonadota;Gammaproteobacteria;Aeromonadales;Aeromonadaceae;Aeromonas;Aeromonas dhakensis	Aeromonas dhakensis	4868053	99.68	0.13	Animal	Completed Genome	ftp://ftp.ncbi.nlm.nih.gov/genomes/all/GCA/002/285/935/GCA_002285935.1_ASM228593v1
Cluster 1	GCA_002286585.1	Bacteria;Pseudomonadota;Gammaproteobacteria;Enterobacterales;Enterobacteriaceae;Escherichia;Escherichia coli	Escherichia coli	100725	99.32	0.19	Animal	Scaffold	ftp://ftp.ncbi.nlm.nih.gov/genomes/all/GCA/002/286/585/GCA_002286585.1_ASM228658v1
Cluster 1	GCA_002288845.1	Bacteria;Pseudomonadota;Gammaproteobacteria;Enterobacterales;Enterobacteriaceae;Klebsiella;Klebsiella pneumoniae	Klebsiella pneumoniae	210635	99.94	0.81	Human	Scaffold	ftp://ftp.ncbi.nlm.nih.gov/genomes/all/GCA/002/288/845/GCA_002288845.1_ASM228884v1
Cluster 1	GCA_002295245.1	Bacteria;Pseudomonadota;Gammaproteobacteria;Enterobacterales;Enterobacteriaceae;Enterobacter;Enterobacter hormaechei	Enterobacter hormaechei	148843	98.39	0.51	Environment	Scaffold	ftp://ftp.ncbi.nlm.nih.gov/genomes/all/GCA/002/295/245/GCA_002295245.1_ASM229524v1
Cluster 1	GCA_002303275.1	Bacteria;Pseudomonadota;Gammaproteobacteria;Enterobacterales;Enterobacteriaceae;Enterobacter;Enterobacter cloacae	Enterobacter cloacae	4918273	98.2	1.04	Human	Completed Genome	ftp://ftp.ncbi.nlm.nih.gov/genomes/all/GCA/002/303/275/GCA_002303275.1_ASM230327v1
Cluster 1	GCA_002313025.1	Bacteria;Pseudomonadota;Gammaproteobacteria;Vibrionales;Vibrionaceae;Vibrio;Vibrio cholerae	Vibrio cholerae	3028272	99.96	0.12	Animal	Completed Genome	ftp://ftp.ncbi.nlm.nih.gov/genomes/all/GCA/002/313/025/GCA_002313025.1_ASM231302v1
Cluster 1	GCA_002333885.1	Bacteria;Pseudomonadota;Gammaproteobacteria;Enterobacterales;Enterobacteriaceae;Enterobacter;Enterobacter asburiae	Enterobacter asburiae	74421	99.97	2.03	Human	Scaffold	ftp://ftp.ncbi.nlm.nih.gov/genomes/all/GCA/002/333/885/GCA_002333885.1_ASM233388v1
Cluster 1	GCA_002334635.1	Bacteria;Pseudomonadota;Gammaproteobacteria;Enterobacterales;Enterobacteriaceae;Enterobacter;Enterobacter kobei	Enterobacter kobei	148471	99.7	0.71	Human	Scaffold	ftp://ftp.ncbi.nlm.nih.gov/genomes/all/GCA/002/334/635/GCA_002334635.1_ASM233463v1
Cluster 1	GCA_002334705.1	Bacteria;Pseudomonadota;Gammaproteobacteria;Enterobacterales;Enterobacteriaceae;Enterobacter;Enterobacter hormaechei	Enterobacter hormaechei subsp. steigerwaltii	112963	99.4	0.26	Human	Scaffold	ftp://ftp.ncbi.nlm.nih.gov/genomes/all/GCA/002/334/705/GCA_002334705.1_ASM233470v1
Cluster 1	GCA_002393385.1	Bacteria;Pseudomonadota;Gammaproteobacteria;Pasteurellales;Pasteurellaceae;Pasteurella;Pasteurella multocida	Pasteurella multocida	2346722	99.55	0	Human	Completed Genome	ftp://ftp.ncbi.nlm.nih.gov/genomes/all/GCA/002/393/385/GCA_002393385.1_ASM239338v1
Cluster 1	GCA_002393445.1	Bacteria;Pseudomonadota;Gammaproteobacteria;Enterobacterales;Enterobacteriaceae;Cedecea;Cedecea neteri	Cedecea neteri	5214802	100	0.83	Human	Completed Genome	ftp://ftp.ncbi.nlm.nih.gov/genomes/all/GCA/002/393/445/GCA_002393445.1_ASM239344v1
Cluster 1	GCA_002494365.2	Bacteria;Pseudomonadota;Gammaproteobacteria;Enterobacterales;Enterobacteriaceae;Escherichia;Escherichia coli	Escherichia coli	4810511	99.22	0.15	Human	Completed Genome	ftp://ftp.ncbi.nlm.nih.gov/genomes/all/GCA/002/494/365/GCA_002494365.2_ASM249436v2
Cluster 1	GCA_002504185.1	Bacteria;Pseudomonadota;Gammaproteobacteria;Vibrionales;Vibrionaceae;Vibrio;Vibrio parahaemolyticus	Vibrio parahaemolyticus	3423876	98.36	1.04	Environment	Chromosome	ftp://ftp.ncbi.nlm.nih.gov/genomes/all/GCA/002/504/185/GCA_002504185.1_ASM250418v1
Cluster 1	GCA_002573055.1	Bacteria;Pseudomonadota;Gammaproteobacteria;Enterobacterales;Enterobacteriaceae;Escherichia;Escherichia coli	Escherichia coli	94897	99.62	0.79	Human	Scaffold	ftp://ftp.ncbi.nlm.nih.gov/genomes/all/GCA/002/573/055/GCA_002573055.1_ASM257305v1
Cluster 1	GCA_002573245.1	Bacteria;Pseudomonadota;Gammaproteobacteria;Enterobacterales;Enterobacteriaceae;Escherichia;Escherichia marmotae	Escherichia marmotae	127820	99.35	0.18	Human	Scaffold	ftp://ftp.ncbi.nlm.nih.gov/genomes/all/GCA/002/573/245/GCA_002573245.1_ASM257324v1
Cluster 1	GCA_002738105.1	Bacteria;Pseudomonadota;Gammaproteobacteria;Enterobacterales;Yersiniaceae;Serratia;Serratia marcescens	Serratia marcescens	3599641	99.63	0.45	Human	Scaffold	ftp://ftp.ncbi.nlm.nih.gov/genomes/all/GCA/002/738/105/GCA_002738105.1_ASM273810v1
Cluster 1	GCA_002752865.1	Bacteria;Pseudomonadota;Gammaproteobacteria;Enterobacterales;Enterobacteriaceae;Klebsiella;Klebsiella pneumoniae	Klebsiella pneumoniae	210635	99.94	0.81	Human	Scaffold	ftp://ftp.ncbi.nlm.nih.gov/genomes/all/GCA/002/752/865/GCA_002752865.1_ASM275286v1
Cluster 1	GCA_002785605.1	Bacteria;Pseudomonadota;Gammaproteobacteria;Enterobacterales;Enterobacteriaceae;Enterobacter;Enterobacter mori	Enterobacter mori	555978	99.51	0.39	Human	Scaffold	ftp://ftp.ncbi.nlm.nih.gov/genomes/all/GCA/002/785/605/GCA_002785605.1_ASM278560v1
Cluster 1	GCA_002785615.1	Bacteria;Pseudomonadota;Gammaproteobacteria;Enterobacterales;Enterobacteriaceae;Enterobacter;Enterobacter roggenkampii	Enterobacter roggenkampii	412598	99.46	0.37	Human	Scaffold	ftp://ftp.ncbi.nlm.nih.gov/genomes/all/GCA/002/785/615/GCA_002785615.1_ASM278561v1
Cluster 1	GCA_002785645.1	Bacteria;Pseudomonadota;Gammaproteobacteria;Enterobacterales;Enterobacteriaceae;Enterobacter;Enterobacter hormaechei	Enterobacter hormaechei	157955	99.97	0.65	Human	Scaffold	ftp://ftp.ncbi.nlm.nih.gov/genomes/all/GCA/002/785/645/GCA_002785645.1_ASM278564v1
Cluster 1	GCA_002785655.1	Bacteria;Pseudomonadota;Gammaproteobacteria;Enterobacterales;Enterobacteriaceae;Enterobacter;Enterobacter hormaechei	Enterobacter hormaechei	128655	99.97	1.07	Human	Scaffold	ftp://ftp.ncbi.nlm.nih.gov/genomes/all/GCA/002/785/655/GCA_002785655.1_ASM278565v1
Cluster 1	GCA_002785865.1	Bacteria;Pseudomonadota;Gammaproteobacteria;Enterobacterales;Enterobacteriaceae;Enterobacter;Enterobacter bugandensis	Enterobacter bugandensis	2518331	99.5	0.39	Human	Scaffold	ftp://ftp.ncbi.nlm.nih.gov/genomes/all/GCA/002/785/865/GCA_002785865.1_ASM278586v1
Cluster 1	GCA_002785915.1	Bacteria;Pseudomonadota;Gammaproteobacteria;Enterobacterales;Enterobacteriaceae;Enterobacter;Enterobacter cloacae	Enterobacter cloacae	164625	99.31	0.45	Human	Scaffold	ftp://ftp.ncbi.nlm.nih.gov/genomes/all/GCA/002/785/915/GCA_002785915.1_ASM278591v1
Cluster 1	GCA_002810135.1	Bacteria;Pseudomonadota;Gammaproteobacteria;Enterobacterales;Enterobacteriaceae;Escherichia;Escherichia coli	Escherichia coli	185922	99.97	0.23	Human	Scaffold	ftp://ftp.ncbi.nlm.nih.gov/genomes/all/GCA/002/810/135/GCA_002810135.1_ASM281013v1
Cluster 1	GCA_002834265.1	Bacteria;Pseudomonadota;Gammaproteobacteria;Aeromonadales;Aeromonadaceae;Aeromonas;Aeromonas hydrophila	Aeromonas hydrophila	170766	97.47	1.7	Human	Scaffold	ftp://ftp.ncbi.nlm.nih.gov/genomes/all/GCA/002/834/265/GCA_002834265.1_ASM283426v1
Cluster 1	GCA_002847885.1	Bacteria;Pseudomonadota;Gammaproteobacteria;Enterobacterales;Morganellaceae;Morganella;Morganella morganii	Morganella morganii	188782	99.46	0.03	Human	Scaffold	ftp://ftp.ncbi.nlm.nih.gov/genomes/all/GCA/002/847/885/GCA_002847885.1_ASM284788v1
Cluster 1	GCA_002848105.1	Bacteria;Pseudomonadota;Gammaproteobacteria;Enterobacterales;Enterobacteriaceae;Enterobacter;Enterobacter bugandensis	Enterobacter bugandensis	244352	99.47	0.06	Human	Scaffold	ftp://ftp.ncbi.nlm.nih.gov/genomes/all/GCA/002/848/105/GCA_002848105.1_ASM284810v1
Cluster 1	GCA_002850455.1	Bacteria;Pseudomonadota;Gammaproteobacteria;Vibrionales;Vibrionaceae;Vibrio;Vibrio vulnificus	Vibrio vulnificus	3303590	98.09	1	Human	Completed Genome	ftp://ftp.ncbi.nlm.nih.gov/genomes/all/GCA/002/850/455/GCA_002850455.1_ASM285045v1
Cluster 1	GCA_002850575.1	Bacteria;Pseudomonadota;Gammaproteobacteria;Enterobacterales;Enterobacteriaceae;Enterobacter;Enterobacter cancerogenus	Enterobacter cancerogenus	4796512	99.2	1.08	Animal	Completed Genome	ftp://ftp.ncbi.nlm.nih.gov/genomes/all/GCA/002/850/575/GCA_002850575.1_ASM285057v1
Cluster 1	GCA_002850695.3	Bacteria;Pseudomonadota;Gammaproteobacteria;Aeromonadales;Aeromonadaceae;Aeromonas;Aeromonas hydrophila	Aeromonas hydrophila subsp. hydrophila	5022876	96.88	3.87	Environment	Completed Genome	ftp://ftp.ncbi.nlm.nih.gov/genomes/all/GCA/002/850/695/GCA_002850695.3_ASM285069v3
Cluster 1	GCA_002852865.1	Bacteria;Pseudomonadota;Gammaproteobacteria;Enterobacterales;Enterobacteriaceae;Klebsiella;Klebsiella aerogenes	Klebsiella aerogenes	264139	100	0.27	Human	Scaffold	ftp://ftp.ncbi.nlm.nih.gov/genomes/all/GCA/002/852/865/GCA_002852865.1_ASM285286v1
Cluster 1	GCA_002860705.1	Bacteria;Pseudomonadota;Gammaproteobacteria;Enterobacterales;Enterobacteriaceae;Enterobacter;Enterobacter bugandensis	Enterobacter bugandensis	529935	99.5	0.06	Human	Scaffold	ftp://ftp.ncbi.nlm.nih.gov/genomes/all/GCA/002/860/705/GCA_002860705.1_ASM286070v1
Cluster 1	GCA_002863725.1	Bacteria;Pseudomonadota;Gammaproteobacteria;Vibrionales;Vibrionaceae;Vibrio;Vibrio vulnificus	Vibrio vulnificus	3311092	98.17	2.08	Animal	Completed Genome	ftp://ftp.ncbi.nlm.nih.gov/genomes/all/GCA/002/863/725/GCA_002863725.1_ASM286372v1
Cluster 1	GCA_002885885.1	Bacteria;Pseudomonadota;Gammaproteobacteria;Enterobacterales;Enterobacteriaceae;Enterobacter;Enterobacter cloacae	Enterobacter cloacae	71640	98.66	1.58	Human	Scaffold	ftp://ftp.ncbi.nlm.nih.gov/genomes/all/GCA/002/885/885/GCA_002885885.1_ASM288588v1
Cluster 1	GCA_002900255.1	Bacteria;Pseudomonadota;Gammaproteobacteria;Aeromonadales;Aeromonadaceae;Aeromonas;Aeromonas veronii	Aeromonas veronii	72935	96.54	1.65	Human	Scaffold	ftp://ftp.ncbi.nlm.nih.gov/genomes/all/GCA/002/900/255/GCA_002900255.1_ASM290025v1
Cluster 1	GCA_002925765.1	Bacteria;Pseudomonadota;Gammaproteobacteria;Aeromonadales;Aeromonadaceae;Aeromonas;Aeromonas jandaei	Aeromonas jandaei	1186183	98.21	0.7	Environment	Scaffold	ftp://ftp.ncbi.nlm.nih.gov/genomes/all/GCA/002/925/765/GCA_002925765.1_ASM292576v1
Cluster 1	GCA_002941455.1	Bacteria;Pseudomonadota;Gammaproteobacteria;Enterobacterales;Enterobacteriaceae;Escherichia;Escherichia coli	Escherichia coli	152144	99.97	0.14	Animal	Scaffold	ftp://ftp.ncbi.nlm.nih.gov/genomes/all/GCA/002/941/455/GCA_002941455.1_ASM294145v1
Cluster 1	GCA_002941745.1	Bacteria;Pseudomonadota;Gammaproteobacteria;Enterobacterales;Enterobacteriaceae;Escherichia;Escherichia coli	Escherichia coli	70277	99.07	0.11	Animal	Scaffold	ftp://ftp.ncbi.nlm.nih.gov/genomes/all/GCA/002/941/745/GCA_002941745.1_ASM294174v1
Cluster 1	GCA_002943855.1	Bacteria;Pseudomonadota;Gammaproteobacteria;Enterobacterales;Enterobacteriaceae;Shigella;Shigella dysenteriae	Shigella dysenteriae	5036586	99.47	0.07	Human	Completed Genome	ftp://ftp.ncbi.nlm.nih.gov/genomes/all/GCA/002/943/855/GCA_002943855.1_ASM294385v1
Cluster 1	GCA_002948995.1	Bacteria;Pseudomonadota;Gammaproteobacteria;Pasteurellales;Pasteurellaceae;Pasteurella;Pasteurella multocida	Pasteurella multocida	2126408	98.93	0	Human	Completed Genome	ftp://ftp.ncbi.nlm.nih.gov/genomes/all/GCA/002/948/995/GCA_002948995.1_ASM294899v1
Cluster 1	GCA_002949935.1	Bacteria;Pseudomonadota;Gammaproteobacteria;Enterobacterales;Enterobacteriaceae;Shigella;Shigella dysenteriae	Shigella dysenteriae	4558619	96.48	0.1	Human	Completed Genome	ftp://ftp.ncbi.nlm.nih.gov/genomes/all/GCA/002/949/935/GCA_002949935.1_ASM294993v1
Cluster 1	GCA_002953515.1	Bacteria;Pseudomonadota;Gammaproteobacteria;Vibrionales;Vibrionaceae;Vibrio;Vibrio alginolyticus	Vibrio alginolyticus	3418310	99.73	0.24	Environment	Completed Genome	ftp://ftp.ncbi.nlm.nih.gov/genomes/all/GCA/002/953/515/GCA_002953515.1_ASM295351v1
Cluster 1	GCA_002953535.1	Bacteria;Pseudomonadota;Gammaproteobacteria;Vibrionales;Vibrionaceae;Vibrio;Vibrio alginolyticus	Vibrio alginolyticus	3434696	99.6	1.33	Animal	Completed Genome	ftp://ftp.ncbi.nlm.nih.gov/genomes/all/GCA/002/953/535/GCA_002953535.1_ASM295353v1
Cluster 1	GCA_002953975.1	Bacteria;Pseudomonadota;Gammaproteobacteria;Vibrionales;Vibrionaceae;Vibrio;Vibrio alginolyticus	Vibrio alginolyticus	3372141	99.39	1.96	Environment	Completed Genome	ftp://ftp.ncbi.nlm.nih.gov/genomes/all/GCA/002/953/975/GCA_002953975.1_ASM295397v1
Cluster 1	GCA_002966615.1	Bacteria;Pseudomonadota;Gammaproteobacteria;Pasteurellales;Pasteurellaceae;Haemophilus;Haemophilus influenzae	Haemophilus influenzae	1886450	99.44	0.02	Human	Completed Genome	ftp://ftp.ncbi.nlm.nih.gov/genomes/all/GCA/002/966/615/GCA_002966615.1_ASM296661v1
Cluster 1	GCA_002966655.1	Bacteria;Pseudomonadota;Gammaproteobacteria;Pasteurellales;Pasteurellaceae;Haemophilus;Haemophilus influenzae	Haemophilus influenzae	1823096	98.92	0.02	Human	Completed Genome	ftp://ftp.ncbi.nlm.nih.gov/genomes/all/GCA/002/966/655/GCA_002966655.1_ASM296665v1
Cluster 1	GCA_002971115.1	Bacteria;Pseudomonadota;Gammaproteobacteria;Enterobacterales;Enterobacteriaceae;Escherichia;Escherichia coli	Escherichia coli	214602	98.95	0.33	Animal	Scaffold	ftp://ftp.ncbi.nlm.nih.gov/genomes/all/GCA/002/971/115/GCA_002971115.1_ASM297111v1
Cluster 1	GCA_002971155.1	Bacteria;Pseudomonadota;Gammaproteobacteria;Enterobacterales;Enterobacteriaceae;Escherichia;Escherichia coli	Escherichia coli	274909	99.97	0.04	Animal	Scaffold	ftp://ftp.ncbi.nlm.nih.gov/genomes/all/GCA/002/971/155/GCA_002971155.1_ASM297115v1
Cluster 1	GCA_002971415.1	Bacteria;Pseudomonadota;Gammaproteobacteria;Enterobacterales;Enterobacteriaceae;Escherichia;Escherichia coli	Escherichia coli	97918	99.12	0.83	Animal	Scaffold	ftp://ftp.ncbi.nlm.nih.gov/genomes/all/GCA/002/971/415/GCA_002971415.1_ASM297141v1
Cluster 1	GCA_002971475.1	Bacteria;Pseudomonadota;Gammaproteobacteria;Enterobacterales;Enterobacteriaceae;Escherichia;Escherichia coli	Escherichia coli	129260	99.32	1.22	Animal	Scaffold	ftp://ftp.ncbi.nlm.nih.gov/genomes/all/GCA/002/971/475/GCA_002971475.1_ASM297147v1
Cluster 1	GCA_002971495.1	Bacteria;Pseudomonadota;Gammaproteobacteria;Enterobacterales;Enterobacteriaceae;Escherichia;Escherichia coli	Escherichia coli	87892	98.88	1.06	Animal	Scaffold	ftp://ftp.ncbi.nlm.nih.gov/genomes/all/GCA/002/971/495/GCA_002971495.1_ASM297149v1
Cluster 1	GCA_002971555.1	Bacteria;Pseudomonadota;Gammaproteobacteria;Enterobacterales;Enterobacteriaceae;Escherichia;Escherichia coli	Escherichia coli	131505	98.99	1	Animal	Scaffold	ftp://ftp.ncbi.nlm.nih.gov/genomes/all/GCA/002/971/555/GCA_002971555.1_ASM297155v1
Cluster 1	GCA_002972035.1	Bacteria;Pseudomonadota;Gammaproteobacteria;Enterobacterales;Enterobacteriaceae;Escherichia;Escherichia coli	Escherichia coli	54172	99.5	0.2	Animal	Scaffold	ftp://ftp.ncbi.nlm.nih.gov/genomes/all/GCA/002/972/035/GCA_002972035.1_ASM297203v1
Cluster 1	GCA_002972095.1	Bacteria;Pseudomonadota;Gammaproteobacteria;Enterobacterales;Enterobacteriaceae;Escherichia;Escherichia coli	Escherichia coli	79402	99.66	0.04	Animal	Scaffold	ftp://ftp.ncbi.nlm.nih.gov/genomes/all/GCA/002/972/095/GCA_002972095.1_ASM297209v1
Cluster 1	GCA_002972395.1	Bacteria;Pseudomonadota;Gammaproteobacteria;Enterobacterales;Enterobacteriaceae;Escherichia;Escherichia coli	Escherichia coli	73411	99.92	0.19	Animal	Scaffold	ftp://ftp.ncbi.nlm.nih.gov/genomes/all/GCA/002/972/395/GCA_002972395.1_ASM297239v1
Cluster 1	GCA_002972565.1	Bacteria;Pseudomonadota;Gammaproteobacteria;Enterobacterales;Enterobacteriaceae;Escherichia;Escherichia coli	Escherichia coli	51404	98.74	1	Animal	Scaffold	ftp://ftp.ncbi.nlm.nih.gov/genomes/all/GCA/002/972/565/GCA_002972565.1_ASM297256v1
Cluster 1	GCA_002982195.1	Bacteria;Pseudomonadota;Gammaproteobacteria;Enterobacterales;Enterobacteriaceae;Enterobacter;Enterobacter cloacae	Enterobacter cloacae	5272177	99.7	0.82	Human	Completed Genome	ftp://ftp.ncbi.nlm.nih.gov/genomes/all/GCA/002/982/195/GCA_002982195.1_ASM298219v1
Cluster 1	GCA_003014775.1	Bacteria;Pseudomonadota;Gammaproteobacteria;Aeromonadales;Aeromonadaceae;Aeromonas;Aeromonas hydrophila	Aeromonas hydrophila	4911246	97.97	1.34	Animal	Completed Genome	ftp://ftp.ncbi.nlm.nih.gov/genomes/all/GCA/003/014/775/GCA_003014775.1_ASM301477v1
Cluster 1	GCA_003018235.1	Bacteria;Pseudomonadota;Gammaproteobacteria;Enterobacterales;Enterobacteriaceae;Escherichia;Escherichia coli	Escherichia coli	5012557	99.97	0.06	Human	Completed Genome	ftp://ftp.ncbi.nlm.nih.gov/genomes/all/GCA/003/018/235/GCA_003018235.1_ASM301823v1
Cluster 1	GCA_003018335.1	Bacteria;Pseudomonadota;Gammaproteobacteria;Enterobacterales;Enterobacteriaceae;Escherichia;Escherichia coli	Escherichia coli	5030044	99.46	0.86	Human	Completed Genome	ftp://ftp.ncbi.nlm.nih.gov/genomes/all/GCA/003/018/335/GCA_003018335.1_ASM301833v1
Cluster 1	GCA_003019035.1	Bacteria;Pseudomonadota;Gammaproteobacteria;Enterobacterales;Enterobacteriaceae;Escherichia;Escherichia coli	Escherichia coli	5168620	99.97	0.04	Human	Completed Genome	ftp://ftp.ncbi.nlm.nih.gov/genomes/all/GCA/003/019/035/GCA_003019035.1_ASM301903v1
Cluster 1	GCA_003019855.1	Bacteria;Pseudomonadota;Gammaproteobacteria;Enterobacterales;Enterobacteriaceae;Plesiomonas;Plesiomonas shigelloides	Plesiomonas shigelloides	3505422	99.97	0	Animal	Completed Genome	ftp://ftp.ncbi.nlm.nih.gov/genomes/all/GCA/003/019/855/GCA_003019855.1_ASM301985v1
Cluster 1	GCA_003028355.1	Bacteria;Pseudomonadota;Gammaproteobacteria;Enterobacterales;Enterobacteriaceae;Klebsiella;Klebsiella pneumoniae	Klebsiella pneumoniae	100031	99.61	0.82	Human	Scaffold	ftp://ftp.ncbi.nlm.nih.gov/genomes/all/GCA/003/028/355/GCA_003028355.1_ASM302835v1
Cluster 1	GCA_003047125.1	Bacteria;Pseudomonadota;Gammaproteobacteria;Vibrionales;Vibrionaceae;Vibrio;Vibrio vulnificus	Vibrio vulnificus Env1	3241343	97.23	1.95	Environment	Completed Genome	ftp://ftp.ncbi.nlm.nih.gov/genomes/all/GCA/003/047/125/GCA_003047125.1_ASM304712v1
Cluster 1	GCA_003074975.2	Bacteria;Pseudomonadota;Gammaproteobacteria;Enterobacterales;Yersiniaceae;Serratia;Serratia liquefaciens	Serratia liquefaciens	5240779	98.21	0.45	Animal	Completed Genome	ftp://ftp.ncbi.nlm.nih.gov/genomes/all/GCA/003/074/975/GCA_003074975.2_ASM307497v2
Cluster 1	GCA_003086275.1	Bacteria;Pseudomonadota;Gammaproteobacteria;Enterobacterales;Enterobacteriaceae;Plesiomonas;Plesiomonas shigelloides	Plesiomonas shigelloides	97808	100	0	Animal	Scaffold	ftp://ftp.ncbi.nlm.nih.gov/genomes/all/GCA/003/086/275/GCA_003086275.1_ASM308627v1
Cluster 1	GCA_003096135.1	Bacteria;Pseudomonadota;Gammaproteobacteria;Vibrionales;Vibrionaceae;Vibrio;Vibrio cholerae	Vibrio cholerae	184546	99.98	0.05	Human	Scaffold	ftp://ftp.ncbi.nlm.nih.gov/genomes/all/GCA/003/096/135/GCA_003096135.1_ASM309613v1
Cluster 1	GCA_003130205.1	Bacteria;Pseudomonadota;Gammaproteobacteria;Pasteurellales;Pasteurellaceae;Aggregatibacter;Aggregatibacter actinomycetemcomitans	Aggregatibacter actinomycetemcomitans	118733	98.22	0.09	Human	Scaffold	ftp://ftp.ncbi.nlm.nih.gov/genomes/all/GCA/003/130/205/GCA_003130205.1_ASM313020v1
Cluster 1	GCA_003144955.1	Bacteria;Pseudomonadota;Gammaproteobacteria;Enterobacterales;Enterobacteriaceae;Escherichia;Escherichia coli	Escherichia coli	62832	99.62	1.54	Environment	Scaffold	ftp://ftp.ncbi.nlm.nih.gov/genomes/all/GCA/003/144/955/GCA_003144955.1_ASM314495v1
Cluster 1	GCA_003145155.1	Bacteria;Pseudomonadota;Gammaproteobacteria;Enterobacterales;Enterobacteriaceae;Escherichia;Escherichia coli	Escherichia coli	97801	99.62	0.79	Environment	Scaffold	ftp://ftp.ncbi.nlm.nih.gov/genomes/all/GCA/003/145/155/GCA_003145155.1_ASM314515v1
Cluster 1	GCA_003145195.1	Bacteria;Pseudomonadota;Gammaproteobacteria;Enterobacterales;Enterobacteriaceae;Escherichia;Escherichia coli	Escherichia coli	53878	98.67	1.62	Environment	Scaffold	ftp://ftp.ncbi.nlm.nih.gov/genomes/all/GCA/003/145/195/GCA_003145195.1_ASM314519v1
Cluster 1	GCA_003145725.1	Bacteria;Pseudomonadota;Gammaproteobacteria;Enterobacterales;Enterobacteriaceae;Escherichia;Escherichia coli	Escherichia coli	60397	99.67	0.13	Environment	Scaffold	ftp://ftp.ncbi.nlm.nih.gov/genomes/all/GCA/003/145/725/GCA_003145725.1_ASM314572v1
Cluster 1	GCA_003146375.1	Bacteria;Pseudomonadota;Gammaproteobacteria;Enterobacterales;Enterobacteriaceae;Escherichia;Escherichia coli	Escherichia coli	54153	99.97	0.31	Environment	Scaffold	ftp://ftp.ncbi.nlm.nih.gov/genomes/all/GCA/003/146/375/GCA_003146375.1_ASM314637v1
Cluster 1	GCA_003186475.1	Bacteria;Pseudomonadota;Gammaproteobacteria;Enterobacterales;Yersiniaceae;Serratia;Serratia marcescens	Serratia marcescens	5059456	99.86	0	Human	Completed Genome	ftp://ftp.ncbi.nlm.nih.gov/genomes/all/GCA/003/186/475/GCA_003186475.1_ASM318647v1
Cluster 1	GCA_003186615.1	Bacteria;Pseudomonadota;Gammaproteobacteria;Enterobacterales;Enterobacteriaceae;Enterobacter;Enterobacter hormaechei	Enterobacter hormaechei	202961	99.97	0.77	Human	Scaffold	ftp://ftp.ncbi.nlm.nih.gov/genomes/all/GCA/003/186/615/GCA_003186615.1_ASM318661v1
Cluster 1	GCA_003203095.1	Bacteria;Pseudomonadota;Gammaproteobacteria;Pasteurellales;Pasteurellaceae;Haemophilus;Haemophilus influenzae	Haemophilus influenzae	103610	99.56	0.02	Human	Scaffold	ftp://ftp.ncbi.nlm.nih.gov/genomes/all/GCA/003/203/095/GCA_003203095.1_ASM320309v1
Cluster 1	GCA_003203175.1	Bacteria;Pseudomonadota;Gammaproteobacteria;Pasteurellales;Pasteurellaceae;Haemophilus;Haemophilus influenzae	Haemophilus influenzae	110435	99.53	0.02	Human	Scaffold	ftp://ftp.ncbi.nlm.nih.gov/genomes/all/GCA/003/203/175/GCA_003203175.1_ASM320317v1
Cluster 1	GCA_003206315.1	Bacteria;Pseudomonadota;Gammaproteobacteria;Enterobacterales;Enterobacteriaceae;Cronobacter;Cronobacter sakazakii	Cronobacter sakazakii	511158	99.99	0.43	Human	Scaffold	ftp://ftp.ncbi.nlm.nih.gov/genomes/all/GCA/003/206/315/GCA_003206315.1_ASM320631v1
Cluster 1	GCA_003207075.1	Bacteria;Pseudomonadota;Gammaproteobacteria;Enterobacterales;Enterobacteriaceae;Cronobacter;Cronobacter sakazakii	Cronobacter sakazakii	358675	99.97	0.32	Human	Scaffold	ftp://ftp.ncbi.nlm.nih.gov/genomes/all/GCA/003/207/075/GCA_003207075.1_ASM320707v1
Cluster 1	GCA_003265425.1	Bacteria;Pseudomonadota;Gammaproteobacteria;Aeromonadales;Aeromonadaceae;Aeromonas;Aeromonas caviae	Aeromonas caviae	75830	99.71	0.16	Environment	Scaffold	ftp://ftp.ncbi.nlm.nih.gov/genomes/all/GCA/003/265/425/GCA_003265425.1_ASM326542v1
Cluster 1	GCA_003265475.1	Bacteria;Pseudomonadota;Gammaproteobacteria;Aeromonadales;Aeromonadaceae;Aeromonas;Aeromonas caviae	Aeromonas caviae	59728	98.88	1.39	Environment	Scaffold	ftp://ftp.ncbi.nlm.nih.gov/genomes/all/GCA/003/265/475/GCA_003265475.1_ASM326547v1
Cluster 1	GCA_003265585.1	Bacteria;Pseudomonadota;Gammaproteobacteria;Aeromonadales;Aeromonadaceae;Aeromonas;Aeromonas veronii	Aeromonas veronii	119499	98.74	2.18	Human	Scaffold	ftp://ftp.ncbi.nlm.nih.gov/genomes/all/GCA/003/265/585/GCA_003265585.1_ASM326558v1
Cluster 1	GCA_003289265.1	Bacteria;Pseudomonadota;Gammaproteobacteria;Enterobacterales;Enterobacteriaceae;Enterobacter;Enterobacter hormaechei	Enterobacter hormaechei	112640	99.18	1.11	Human	Scaffold	ftp://ftp.ncbi.nlm.nih.gov/genomes/all/GCA/003/289/265/GCA_003289265.1_ASM328926v1
Cluster 1	GCA_003289275.1	Bacteria;Pseudomonadota;Gammaproteobacteria;Enterobacterales;Enterobacteriaceae;Enterobacter;Enterobacter cloacae	Enterobacter cloacae	167061	98.68	0.78	Human	Scaffold	ftp://ftp.ncbi.nlm.nih.gov/genomes/all/GCA/003/289/275/GCA_003289275.1_ASM328927v1
Cluster 1	GCA_003289385.1	Bacteria;Pseudomonadota;Gammaproteobacteria;Enterobacterales;Enterobacteriaceae;Enterobacter;Enterobacter hormaechei	Enterobacter hormaechei subsp. steigerwaltii	117953	99.37	0.79	Human	Scaffold	ftp://ftp.ncbi.nlm.nih.gov/genomes/all/GCA/003/289/385/GCA_003289385.1_ASM328938v1
Cluster 1	GCA_003289415.1	Bacteria;Pseudomonadota;Gammaproteobacteria;Enterobacterales;Enterobacteriaceae;Enterobacter;Enterobacter asburiae	Enterobacter asburiae	80960	99.97	0.38	Human	Scaffold	ftp://ftp.ncbi.nlm.nih.gov/genomes/all/GCA/003/289/415/GCA_003289415.1_ASM328941v1
Cluster 1	GCA_003289725.1	Bacteria;Pseudomonadota;Gammaproteobacteria;Enterobacterales;Enterobacteriaceae;Enterobacter;Enterobacter kobei	Enterobacter kobei	64667	99.7	1.21	Human	Scaffold	ftp://ftp.ncbi.nlm.nih.gov/genomes/all/GCA/003/289/725/GCA_003289725.1_ASM328972v1
Cluster 1	GCA_003289825.1	Bacteria;Pseudomonadota;Gammaproteobacteria;Enterobacterales;Enterobacteriaceae;Enterobacter;Enterobacter cloacae	Enterobacter cloacae	116832	99.07	1.17	Human	Scaffold	ftp://ftp.ncbi.nlm.nih.gov/genomes/all/GCA/003/289/825/GCA_003289825.1_ASM328982v1
Cluster 1	GCA_003290515.1	Bacteria;Pseudomonadota;Gammaproteobacteria;Enterobacterales;Enterobacteriaceae;Escherichia;Escherichia coli	Escherichia coli	94603	99.97	0.04	Human	Scaffold	ftp://ftp.ncbi.nlm.nih.gov/genomes/all/GCA/003/290/515/GCA_003290515.1_ASM329051v1
Cluster 1	GCA_003290535.1	Bacteria;Pseudomonadota;Gammaproteobacteria;Enterobacterales;Enterobacteriaceae;Escherichia;Escherichia coli	Escherichia coli	194645	99.01	0.25	Human	Scaffold	ftp://ftp.ncbi.nlm.nih.gov/genomes/all/GCA/003/290/535/GCA_003290535.1_ASM329053v1
Cluster 1	GCA_003291305.1	Bacteria;Pseudomonadota;Gammaproteobacteria;Enterobacterales;Enterobacteriaceae;Escherichia;Escherichia coli	Escherichia coli	88243	99.97	0.33	Human	Scaffold	ftp://ftp.ncbi.nlm.nih.gov/genomes/all/GCA/003/291/305/GCA_003291305.1_ASM329130v1
Cluster 1	GCA_003291745.1	Bacteria;Pseudomonadota;Gammaproteobacteria;Enterobacterales;Enterobacteriaceae;Escherichia;Escherichia coli	Escherichia coli	88916	99.62	0.5	Human	Scaffold	ftp://ftp.ncbi.nlm.nih.gov/genomes/all/GCA/003/291/745/GCA_003291745.1_ASM329174v1
Cluster 1	GCA_003291905.1	Bacteria;Pseudomonadota;Gammaproteobacteria;Enterobacterales;Enterobacteriaceae;Escherichia;Escherichia coli	Escherichia coli	214736	99.97	0.06	Human	Scaffold	ftp://ftp.ncbi.nlm.nih.gov/genomes/all/GCA/003/291/905/GCA_003291905.1_ASM329190v1
Cluster 1	GCA_003292195.1	Bacteria;Pseudomonadota;Gammaproteobacteria;Enterobacterales;Enterobacteriaceae;Escherichia;Escherichia coli	Escherichia coli	121820	99.97	0.69	Human	Scaffold	ftp://ftp.ncbi.nlm.nih.gov/genomes/all/GCA/003/292/195/GCA_003292195.1_ASM329219v1
Cluster 1	GCA_003292225.1	Bacteria;Pseudomonadota;Gammaproteobacteria;Enterobacterales;Enterobacteriaceae;Escherichia;Escherichia coli	Escherichia coli	55184	99.52	0.04	Human	Scaffold	ftp://ftp.ncbi.nlm.nih.gov/genomes/all/GCA/003/292/225/GCA_003292225.1_ASM329222v1
Cluster 1	GCA_003294855.2	Bacteria;Pseudomonadota;Gammaproteobacteria;Aeromonadales;Aeromonadaceae;Aeromonas;Aeromonas caviae	Aeromonas caviae	4702913	98.5	1.53	Environment	Completed Genome	ftp://ftp.ncbi.nlm.nih.gov/genomes/all/GCA/003/294/855/GCA_003294855.2_ASM329485v2
Cluster 1	GCA_003294925.2	Bacteria;Pseudomonadota;Gammaproteobacteria;Aeromonadales;Aeromonadaceae;Aeromonas;Aeromonas caviae	Aeromonas caviae	4690132	99.27	0.44	Environment	Completed Genome	ftp://ftp.ncbi.nlm.nih.gov/genomes/all/GCA/003/294/925/GCA_003294925.2_ASM329492v2
Cluster 1	GCA_003351425.1	Bacteria;Pseudomonadota;Gammaproteobacteria;Pasteurellales;Pasteurellaceae;Haemophilus;Haemophilus influenzae	Haemophilus influenzae	1817261	97.74	0.21	Human	Completed Genome	ftp://ftp.ncbi.nlm.nih.gov/genomes/all/GCA/003/351/425/GCA_003351425.1_ASM335142v1
Cluster 1	GCA_003351445.1	Bacteria;Pseudomonadota;Gammaproteobacteria;Pasteurellales;Pasteurellaceae;Haemophilus;Haemophilus influenzae	Haemophilus influenzae	1860196	99.35	0.02	Human	Completed Genome	ftp://ftp.ncbi.nlm.nih.gov/genomes/all/GCA/003/351/445/GCA_003351445.1_ASM335144v1
Cluster 1	GCA_003351465.1	Bacteria;Pseudomonadota;Gammaproteobacteria;Pasteurellales;Pasteurellaceae;Haemophilus;Haemophilus influenzae	Haemophilus influenzae	1816295	98.9	0.02	Human	Completed Genome	ftp://ftp.ncbi.nlm.nih.gov/genomes/all/GCA/003/351/465/GCA_003351465.1_ASM335146v1
Cluster 1	GCA_003351625.1	Bacteria;Pseudomonadota;Gammaproteobacteria;Pasteurellales;Pasteurellaceae;Haemophilus;Haemophilus haemolyticus	Haemophilus haemolyticus	1822569	95.23	0.95	Human	Completed Genome	ftp://ftp.ncbi.nlm.nih.gov/genomes/all/GCA/003/351/625/GCA_003351625.1_ASM335162v1
Cluster 1	GCA_003352345.1	Bacteria;Pseudomonadota;Gammaproteobacteria;Pasteurellales;Pasteurellaceae;Haemophilus;Haemophilus influenzae	Haemophilus influenzae	1914782	98.18	0.66	Human	Completed Genome	ftp://ftp.ncbi.nlm.nih.gov/genomes/all/GCA/003/352/345/GCA_003352345.1_ASM335234v1
Cluster 1	GCA_003357465.1	Bacteria;Pseudomonadota;Gammaproteobacteria;Enterobacterales;Enterobacteriaceae;Escherichia;Escherichia coli	Escherichia coli	256609	99.62	0.08	Environment	Scaffold	ftp://ftp.ncbi.nlm.nih.gov/genomes/all/GCA/003/357/465/GCA_003357465.1_ASM335746v1
Cluster 1	GCA_003357615.1	Bacteria;Pseudomonadota;Gammaproteobacteria;Enterobacterales;Enterobacteriaceae;Escherichia;Escherichia coli	Escherichia coli	219574	99.97	0.04	Environment	Scaffold	ftp://ftp.ncbi.nlm.nih.gov/genomes/all/GCA/003/357/615/GCA_003357615.1_ASM335761v1
Cluster 1	GCA_003357725.1	Bacteria;Pseudomonadota;Gammaproteobacteria;Enterobacterales;Enterobacteriaceae;Escherichia;Escherichia coli	Escherichia coli	135207	99.62	0.18	Environment	Scaffold	ftp://ftp.ncbi.nlm.nih.gov/genomes/all/GCA/003/357/725/GCA_003357725.1_ASM335772v1
Cluster 1	GCA_003357945.1	Bacteria;Pseudomonadota;Gammaproteobacteria;Enterobacterales;Enterobacteriaceae;Escherichia;Escherichia coli	Escherichia coli	269948	99.59	0.14	Environment	Scaffold	ftp://ftp.ncbi.nlm.nih.gov/genomes/all/GCA/003/357/945/GCA_003357945.1_ASM335794v1
Cluster 1	GCA_003408555.1	Bacteria;Pseudomonadota;Gammaproteobacteria;Enterobacterales;Enterobacteriaceae;Enterobacter;Enterobacter hormaechei	Enterobacter hormaechei	4722490	99.45	0.76	Human	Completed Genome	ftp://ftp.ncbi.nlm.nih.gov/genomes/all/GCA/003/408/555/GCA_003408555.1_ASM340855v1
Cluster 1	GCA_003425445.1	Bacteria;Pseudomonadota;Gammaproteobacteria;Pasteurellales;Pasteurellaceae;Haemophilus;Haemophilus influenzae	Haemophilus influenzae	1838740	99.81	1.08	Human	Completed Genome	ftp://ftp.ncbi.nlm.nih.gov/genomes/all/GCA/003/425/445/GCA_003425445.1_ASM342544v1
Cluster 1	GCA_003425465.1	Bacteria;Pseudomonadota;Gammaproteobacteria;Pasteurellales;Pasteurellaceae;Haemophilus;Haemophilus influenzae	Haemophilus influenzae	1833710	99.76	0.02	Human	Completed Genome	ftp://ftp.ncbi.nlm.nih.gov/genomes/all/GCA/003/425/465/GCA_003425465.1_ASM342546v1
Cluster 1	GCA_003425625.1	Bacteria;Pseudomonadota;Gammaproteobacteria;Pasteurellales;Pasteurellaceae;Haemophilus;Haemophilus influenzae	Haemophilus influenzae	1833305	99.81	1.08	Human	Completed Genome	ftp://ftp.ncbi.nlm.nih.gov/genomes/all/GCA/003/425/625/GCA_003425625.1_ASM342562v1
Cluster 1	GCA_003425645.1	Bacteria;Pseudomonadota;Gammaproteobacteria;Pasteurellales;Pasteurellaceae;Haemophilus;Haemophilus influenzae	Haemophilus influenzae	1908143	98.96	0.3	Human	Completed Genome	ftp://ftp.ncbi.nlm.nih.gov/genomes/all/GCA/003/425/645/GCA_003425645.1_ASM342564v1
Cluster 1	GCA_003425765.1	Bacteria;Pseudomonadota;Gammaproteobacteria;Pasteurellales;Pasteurellaceae;Haemophilus;Haemophilus influenzae	Haemophilus influenzae	1833864	99.76	0.02	Human	Completed Genome	ftp://ftp.ncbi.nlm.nih.gov/genomes/all/GCA/003/425/765/GCA_003425765.1_ASM342576v1
Cluster 1	GCA_003425955.1	Bacteria;Pseudomonadota;Gammaproteobacteria;Pasteurellales;Pasteurellaceae;Haemophilus;Haemophilus influenzae	Haemophilus influenzae	1904311	99.36	0.02	Human	Completed Genome	ftp://ftp.ncbi.nlm.nih.gov/genomes/all/GCA/003/425/955/GCA_003425955.1_ASM342595v1
Cluster 1	GCA_003432465.1	Bacteria;Pseudomonadota;Gammaproteobacteria;Aeromonadales;Aeromonadaceae;Aeromonas;Aeromonas dhakensis	Aeromonas dhakensis	400223	99.96	0.22	Human	Scaffold	ftp://ftp.ncbi.nlm.nih.gov/genomes/all/GCA/003/432/465/GCA_003432465.1_ASM343246v1
Cluster 1	GCA_003471865.1	Bacteria;Pseudomonadota;Gammaproteobacteria;Enterobacterales;Enterobacteriaceae;Enterobacter;Enterobacter cloacae	Enterobacter cloacae	454622	99.97	0.45	Human	Scaffold	ftp://ftp.ncbi.nlm.nih.gov/genomes/all/GCA/003/471/865/GCA_003471865.1_ASM347186v1
Cluster 1	GCA_003491245.1	Bacteria;Pseudomonadota;Gammaproteobacteria;Aeromonadales;Aeromonadaceae;Aeromonas;Aeromonas hydrophila	Aeromonas hydrophila	4955171	98.03	2.22	Human	Completed Genome	ftp://ftp.ncbi.nlm.nih.gov/genomes/all/GCA/003/491/245/GCA_003491245.1_ASM349124v1
Cluster 1	GCA_003491365.1	Bacteria;Pseudomonadota;Gammaproteobacteria;Aeromonadales;Aeromonadaceae;Aeromonas;Aeromonas veronii	Aeromonas veronii	4652208	97.49	2.07	Animal	Completed Genome	ftp://ftp.ncbi.nlm.nih.gov/genomes/all/GCA/003/491/365/GCA_003491365.1_ASM349136v1
Cluster 1	GCA_003516105.2	Bacteria;Pseudomonadota;Gammaproteobacteria;Enterobacterales;Enterobacteriaceae;Cronobacter;Cronobacter sakazakii	Cronobacter sakazakii	4496886	99.69	0.36	Human	Completed Genome	ftp://ftp.ncbi.nlm.nih.gov/genomes/all/GCA/003/516/105/GCA_003516105.2_ASM351610v2
Cluster 1	GCA_003573445.1	Bacteria;Pseudomonadota;Gammaproteobacteria;Enterobacterales;Morganellaceae;Morganella;Morganella morganii	Morganella morganii	3902034	100	0	Animal	Completed Genome	ftp://ftp.ncbi.nlm.nih.gov/genomes/all/GCA/003/573/445/GCA_003573445.1_ASM357344v1
Cluster 1	GCA_003591575.1	Bacteria;Pseudomonadota;Gammaproteobacteria;Vibrionales;Vibrionaceae;Vibrio;Vibrio cholerae	Vibrio cholerae	3031091	99.98	0.05	Human	Completed Genome	ftp://ftp.ncbi.nlm.nih.gov/genomes/all/GCA/003/591/575/GCA_003591575.1_ASM359157v1
Cluster 1	GCA_003594935.2	Bacteria;Pseudomonadota;Gammaproteobacteria;Enterobacterales;Enterobacteriaceae;Enterobacter;Enterobacter huaxiensis	Enterobacter huaxiensis	4902119	99.51	1.02	Human	Completed Genome	ftp://ftp.ncbi.nlm.nih.gov/genomes/all/GCA/003/594/935/GCA_003594935.2_ASM359493v2
Cluster 1	GCA_003627555.1	Bacteria;Pseudomonadota;Gammaproteobacteria;Enterobacterales;Enterobacteriaceae;Enterobacter;Enterobacter bugandensis	Enterobacter bugandensis	310600	99.5	0.22	Environment	Scaffold	ftp://ftp.ncbi.nlm.nih.gov/genomes/all/GCA/003/627/555/GCA_003627555.1_ASM362755v1
Cluster 1	GCA_003665375.1	Bacteria;Pseudomonadota;Gammaproteobacteria;Enterobacterales;Enterobacteriaceae;Enterobacter;Enterobacter kobei	Enterobacter kobei	4953590	99.4	1.37	Human	Completed Genome	ftp://ftp.ncbi.nlm.nih.gov/genomes/all/GCA/003/665/375/GCA_003665375.1_ASM366537v1
Cluster 1	GCA_003665595.1	Bacteria;Pseudomonadota;Gammaproteobacteria;Enterobacterales;Enterobacteriaceae;Citrobacter;Citrobacter freundii	Citrobacter freundii	5343952	98.28	2.81	Human	Completed Genome	ftp://ftp.ncbi.nlm.nih.gov/genomes/all/GCA/003/665/595/GCA_003665595.1_ASM366559v1
Cluster 1	GCA_003665655.1	Bacteria;Pseudomonadota;Gammaproteobacteria;Enterobacterales;Enterobacteriaceae;Citrobacter;Citrobacter freundii	Citrobacter freundii	4899014	97.6	1.83	Human	Completed Genome	ftp://ftp.ncbi.nlm.nih.gov/genomes/all/GCA/003/665/655/GCA_003665655.1_ASM366565v1
Cluster 1	GCA_003691655.1	Bacteria;Pseudomonadota;Gammaproteobacteria;Pasteurellales;Pasteurellaceae;Haemophilus;Haemophilus influenzae	Haemophilus influenzae	1849298	98.75	1.29	Human	Chromosome	ftp://ftp.ncbi.nlm.nih.gov/genomes/all/GCA/003/691/655/GCA_003691655.1_ASM369165v1
Cluster 1	GCA_003699145.1	Bacteria;Pseudomonadota;Gammaproteobacteria;Enterobacterales;Yersiniaceae;Serratia;Serratia plymuthica	Serratia plymuthica	61071	97.21	0	Enironment	Scaffold	ftp://ftp.ncbi.nlm.nih.gov/genomes/all/GCA/003/699/145/GCA_003699145.1_ASM369914v1
Cluster 1	GCA_003711965.1	Bacteria;Pseudomonadota;Gammaproteobacteria;Enterobacterales;Enterobacteriaceae;Klebsiella;Klebsiella quasipneumoniae	Klebsiella pneumoniae	367144	99.69	0.76	Human	Scaffold	ftp://ftp.ncbi.nlm.nih.gov/genomes/all/GCA/003/711/965/GCA_003711965.1_ASM371196v1
Cluster 1	GCA_003716365.1	Bacteria;Pseudomonadota;Gammaproteobacteria;Vibrionales;Vibrionaceae;Vibrio;Vibrio cholerae	Vibrio cholerae	204192	99.33	1.89	Environment	Scaffold	ftp://ftp.ncbi.nlm.nih.gov/genomes/all/GCA/003/716/365/GCA_003716365.1_ASM371636v1
Cluster 1	GCA_003722175.1	Bacteria;Pseudomonadota;Gammaproteobacteria;Aeromonadales;Aeromonadaceae;Aeromonas;Aeromonas veronii	Aeromonas veronii	4683931	99.37	2.37	Animal	Completed Genome	ftp://ftp.ncbi.nlm.nih.gov/genomes/all/GCA/003/722/175/GCA_003722175.1_ASM372217v1
Cluster 1	GCA_003723975.1	Bacteria;Pseudomonadota;Gammaproteobacteria;Aeromonadales;Aeromonadaceae;Aeromonas;Aeromonas dhakensis	Aeromonas dhakensis	260082	99.74	0.34	Human	Scaffold	ftp://ftp.ncbi.nlm.nih.gov/genomes/all/GCA/003/723/975/GCA_003723975.1_ASM372397v1
Cluster 1	GCA_003795405.1	Bacteria;Pseudomonadota;Gammaproteobacteria;Enterobacterales;Enterobacteriaceae;Escherichia;Escherichia coli	Escherichia coli	204973	99.97	0.04	Human	Scaffold	ftp://ftp.ncbi.nlm.nih.gov/genomes/all/GCA/003/795/405/GCA_003795405.1_ASM379540v1
Cluster 1	GCA_003812145.1	Bacteria;Pseudomonadota;Gammaproteobacteria;Enterobacterales;Enterobacteriaceae;Enterobacter;Enterobacter roggenkampii	Enterobacter roggenkampii	4879214	99.07	1.37	Human	Completed Genome	ftp://ftp.ncbi.nlm.nih.gov/genomes/all/GCA/003/812/145/GCA_003812145.1_ASM381214v1
Cluster 1	GCA_003936525.1	Bacteria;Pseudomonadota;Gammaproteobacteria;Enterobacterales;Enterobacteriaceae;Enterobacter;Enterobacter hormaechei	Enterobacter hormaechei	122761	99.55	0.79	Environment	Scaffold	ftp://ftp.ncbi.nlm.nih.gov/genomes/all/GCA/003/936/525/GCA_003936525.1_ASM393652v1
Cluster 1	GCA_003937295.2	Bacteria;Pseudomonadota;Gammaproteobacteria;Enterobacterales;Enterobacteriaceae;Enterobacter;Enterobacter hormaechei	Enterobacter hormaechei	4592226	99.61	0.77	Environment	Chromosome	ftp://ftp.ncbi.nlm.nih.gov/genomes/all/GCA/003/937/295/GCA_003937295.2_ASM393729v2
Cluster 1	GCA_003937345.2	Bacteria;Pseudomonadota;Gammaproteobacteria;Enterobacterales;Enterobacteriaceae;Citrobacter;Citrobacter freundii	Citrobacter freundii	4996134	99.97	0.96	Environment	Completed Genome	ftp://ftp.ncbi.nlm.nih.gov/genomes/all/GCA/003/937/345/GCA_003937345.2_ASM393734v2
Cluster 1	GCA_003938165.1	Bacteria;Pseudomonadota;Gammaproteobacteria;Enterobacterales;Enterobacteriaceae;Enterobacter;Enterobacter cloacae	Enterobacter cloacae	116763	99.67	1.04	Environment	Scaffold	ftp://ftp.ncbi.nlm.nih.gov/genomes/all/GCA/003/938/165/GCA_003938165.1_ASM393816v1
Cluster 1	GCA_003938205.1	Bacteria;Pseudomonadota;Gammaproteobacteria;Enterobacterales;Enterobacteriaceae;Citrobacter;Citrobacter farmeri	Citrobacter farmeri	482981	99.15	3.46	Environment	Scaffold	ftp://ftp.ncbi.nlm.nih.gov/genomes/all/GCA/003/938/205/GCA_003938205.1_ASM393820v1
Cluster 1	GCA_003955925.1	Bacteria;Pseudomonadota;Gammaproteobacteria;Enterobacterales;Enterobacteriaceae;Cronobacter;Cronobacter sakazakii	Cronobacter sakazakii	4432028	99.99	0.48	Human	Completed Genome	ftp://ftp.ncbi.nlm.nih.gov/genomes/all/GCA/003/955/925/GCA_003955925.1_ASM395592v1
Cluster 1	GCA_003990305.1	Bacteria;Pseudomonadota;Gammaproteobacteria;Aeromonadales;Aeromonadaceae;Aeromonas;Aeromonas veronii	Aeromonas veronii	204972	99.01	2.4	Animal	Scaffold	ftp://ftp.ncbi.nlm.nih.gov/genomes/all/GCA/003/990/305/GCA_003990305.1_ASM399030v1
Cluster 1	GCA_004023995.1	Bacteria;Pseudomonadota;Gammaproteobacteria;Enterobacterales;Enterobacteriaceae;Citrobacter;Citrobacter freundii	Citrobacter freundii	129695	98.18	2.99	Environment	Scaffold	ftp://ftp.ncbi.nlm.nih.gov/genomes/all/GCA/004/023/995/GCA_004023995.1_ASM402399v1
Cluster 1	GCA_004024015.1	Bacteria;Pseudomonadota;Gammaproteobacteria;Enterobacterales;Enterobacteriaceae;Klebsiella;Klebsiella pneumoniae	Klebsiella pneumoniae	94274	98.14	1.76	Environment	Scaffold	ftp://ftp.ncbi.nlm.nih.gov/genomes/all/GCA/004/024/015/GCA_004024015.1_ASM402401v1
Cluster 1	GCA_004024095.1	Bacteria;Pseudomonadota;Gammaproteobacteria;Enterobacterales;Enterobacteriaceae;Enterobacter;Enterobacter asburiae	Enterobacter asburiae	155970	99.97	0.99	Environment	Scaffold	ftp://ftp.ncbi.nlm.nih.gov/genomes/all/GCA/004/024/095/GCA_004024095.1_ASM402409v1
Cluster 1	GCA_004024245.1	Bacteria;Pseudomonadota;Gammaproteobacteria;Enterobacterales;Enterobacteriaceae;Klebsiella;Klebsiella quasipneumoniae	Klebsiella pneumoniae	264450	98.87	0.84	Environment	Scaffold	ftp://ftp.ncbi.nlm.nih.gov/genomes/all/GCA/004/024/245/GCA_004024245.1_ASM402424v1
Cluster 1	GCA_004024275.1	Bacteria;Pseudomonadota;Gammaproteobacteria;Enterobacterales;Enterobacteriaceae;Klebsiella;Klebsiella quasipneumoniae	Klebsiella pneumoniae	175978	99.1	1.01	Environment	Scaffold	ftp://ftp.ncbi.nlm.nih.gov/genomes/all/GCA/004/024/275/GCA_004024275.1_ASM402427v1
Cluster 1	GCA_004024335.1	Bacteria;Pseudomonadota;Gammaproteobacteria;Enterobacterales;Enterobacteriaceae;Enterobacter;Enterobacter cloacae	Enterobacter cloacae	62093	98.78	0.94	Environment	Scaffold	ftp://ftp.ncbi.nlm.nih.gov/genomes/all/GCA/004/024/335/GCA_004024335.1_ASM402433v1
Cluster 1	GCA_004024365.1	Bacteria;Pseudomonadota;Gammaproteobacteria;Enterobacterales;Enterobacteriaceae;Citrobacter;Citrobacter freundii	Citrobacter freundii	129572	97.44	4.18	Environment	Scaffold	ftp://ftp.ncbi.nlm.nih.gov/genomes/all/GCA/004/024/365/GCA_004024365.1_ASM402436v1
Cluster 1	GCA_004024425.1	Bacteria;Pseudomonadota;Gammaproteobacteria;Enterobacterales;Enterobacteriaceae;Enterobacter;Enterobacter cloacae	Enterobacter cloacae	192842	98.33	1.05	Environment	Scaffold	ftp://ftp.ncbi.nlm.nih.gov/genomes/all/GCA/004/024/425/GCA_004024425.1_ASM402442v1
Cluster 1	GCA_004100755.1	Bacteria;Pseudomonadota;Gammaproteobacteria;Enterobacterales;Enterobacteriaceae;Escherichia;Escherichia coli	Escherichia coli	273529	99.05	0.82	Human	Scaffold	ftp://ftp.ncbi.nlm.nih.gov/genomes/all/GCA/004/100/755/GCA_004100755.1_ASM410075v1
Cluster 1	GCA_004103775.1	Bacteria;Pseudomonadota;Gammaproteobacteria;Enterobacterales;Enterobacteriaceae;Citrobacter;Citrobacter freundii	Citrobacter freundii	5124258	97.54	4.85	Environment	Completed Genome	ftp://ftp.ncbi.nlm.nih.gov/genomes/all/GCA/004/103/775/GCA_004103775.1_ASM410377v1
Cluster 1	GCA_004117115.1	Bacteria;Pseudomonadota;Gammaproteobacteria;Vibrionales;Vibrionaceae;Vibrio;Vibrio cholerae	Vibrio cholerae	2963247	98.91	0.7	Human	Completed Genome	ftp://ftp.ncbi.nlm.nih.gov/genomes/all/GCA/004/117/115/GCA_004117115.1_ASM411711v1
Cluster 1	GCA_004126455.1	Bacteria;Pseudomonadota;Gammaproteobacteria;Enterobacterales;Enterobacteriaceae;Enterobacter;Enterobacter cloacae	Enterobacter cloacae	175679	98.45	2.52	Environment	Scaffold	ftp://ftp.ncbi.nlm.nih.gov/genomes/all/GCA/004/126/455/GCA_004126455.1_ASM412645v1
Cluster 1	GCA_004127355.1	Bacteria;Pseudomonadota;Gammaproteobacteria;Enterobacterales;Enterobacteriaceae;Enterobacter;Enterobacter cloacae	Enterobacter cloacae	268127	98.94	0.73	Animal	Scaffold	ftp://ftp.ncbi.nlm.nih.gov/genomes/all/GCA/004/127/355/GCA_004127355.1_ASM412735v1
Cluster 1	GCA_004127365.1	Bacteria;Pseudomonadota;Gammaproteobacteria;Enterobacterales;Enterobacteriaceae;Enterobacter;Enterobacter cloacae	Enterobacter cloacae	110138	99.95	0.1	Animal	Scaffold	ftp://ftp.ncbi.nlm.nih.gov/genomes/all/GCA/004/127/365/GCA_004127365.1_ASM412736v1
Cluster 1	GCA_004135955.1	Bacteria;Pseudomonadota;Gammaproteobacteria;Enterobacterales;Enterobacteriaceae;Enterobacter;Enterobacter cloacae	Enterobacter cloacae	5036175	98.48	0.05	Human	Chromosome	ftp://ftp.ncbi.nlm.nih.gov/genomes/all/GCA/004/135/955/GCA_004135955.1_ASM413595v1
Cluster 1	GCA_004146255.1	Bacteria;Pseudomonadota;Gammaproteobacteria;Enterobacterales;Enterobacteriaceae;Enterobacter;Enterobacter cloacae	Enterobacter cloacae	113747	99.97	0.76	Human	Scaffold	ftp://ftp.ncbi.nlm.nih.gov/genomes/all/GCA/004/146/255/GCA_004146255.1_ASM414625v1
Cluster 1	GCA_004171665.1	Bacteria;Pseudomonadota;Gammaproteobacteria;Enterobacterales;Enterobacteriaceae;Escherichia;Escherichia coli	Escherichia coli	75892	99.97	0.04	Animal	Scaffold	ftp://ftp.ncbi.nlm.nih.gov/genomes/all/GCA/004/171/665/GCA_004171665.1_ASM417166v1
Cluster 1	GCA_004179565.1	Bacteria;Pseudomonadota;Gammaproteobacteria;Enterobacterales;Yersiniaceae;Serratia;Serratia marcescens	Serratia marcescens	125178	99.35	0	Human	Scaffold	ftp://ftp.ncbi.nlm.nih.gov/genomes/all/GCA/004/179/565/GCA_004179565.1_ASM417956v1
Cluster 1	GCA_004181995.1	Bacteria;Pseudomonadota;Gammaproteobacteria;Enterobacterales;Enterobacteriaceae;Citrobacter;Citrobacter koseri	Citrobacter koseri	137220	99.76	1.32	Human	Scaffold	ftp://ftp.ncbi.nlm.nih.gov/genomes/all/GCA/004/181/995/GCA_004181995.1_ASM418199v1
Cluster 1	GCA_004284095.1	Bacteria;Pseudomonadota;Gammaproteobacteria;Enterobacterales;Enterobacteriaceae;Escherichia;Escherichia coli	Escherichia coli	82026	99.97	0.04	Animal	Scaffold	ftp://ftp.ncbi.nlm.nih.gov/genomes/all/GCA/004/284/095/GCA_004284095.1_ASM428409v1
Cluster 1	GCA_004302945.1	Bacteria;Pseudomonadota;Gammaproteobacteria;Vibrionales;Vibrionaceae;Vibrio;Vibrio vulnificus	Vibrio vulnificus	63012	96.72	1.47	Human	Scaffold	ftp://ftp.ncbi.nlm.nih.gov/genomes/all/GCA/004/302/945/GCA_004302945.1_ASM430294v1
Cluster 1	GCA_004319645.1	Bacteria;Pseudomonadota;Gammaproteobacteria;Vibrionales;Vibrionaceae;Vibrio;Vibrio vulnificus	Vibrio vulnificus	3217678	98.51	1.58	Human	Completed Genome	ftp://ftp.ncbi.nlm.nih.gov/genomes/all/GCA/004/319/645/GCA_004319645.1_ASM431964v1
Cluster 1	GCA_004328575.1	Bacteria;Pseudomonadota;Gammaproteobacteria;Vibrionales;Vibrionaceae;Vibrio;Vibrio cholerae	Vibrio cholerae	2942340	99.98	0.11	Environment	Completed Genome	ftp://ftp.ncbi.nlm.nih.gov/genomes/all/GCA/004/328/575/GCA_004328575.1_ASM432857v1
Cluster 1	GCA_004355205.1	Bacteria;Pseudomonadota;Gammaproteobacteria;Vibrionales;Vibrionaceae;Vibrio;Vibrio vulnificus	Vibrio vulnificus	3336780	99.37	0.42	Human	Chromosome	ftp://ftp.ncbi.nlm.nih.gov/genomes/all/GCA/004/355/205/GCA_004355205.1_ASM435520v1
Cluster 1	GCA_004362455.1	Bacteria;Pseudomonadota;Gammaproteobacteria;Pasteurellales;Pasteurellaceae;Haemophilus;Haemophilus haemolyticus	Haemophilus haemolyticus	71239	95.91	0.44	Human	Scaffold	ftp://ftp.ncbi.nlm.nih.gov/genomes/all/GCA/004/362/455/GCA_004362455.1_ASM436245v1
Cluster 1	GCA_004380735.1	Bacteria;Pseudomonadota;Gammaproteobacteria;Enterobacterales;Enterobacteriaceae;Escherichia;Escherichia coli	Escherichia coli	172911	99.97	0.11	Human	Scaffold	ftp://ftp.ncbi.nlm.nih.gov/genomes/all/GCA/004/380/735/GCA_004380735.1_ASM438073v1
Cluster 1	GCA_004684305.1	Bacteria;Pseudomonadota;Gammaproteobacteria;Aeromonadales;Aeromonadaceae;Aeromonas;Aeromonas hydrophila	Aeromonas hydrophila	5145899	97.94	3.28	Animal	Completed Genome	ftp://ftp.ncbi.nlm.nih.gov/genomes/all/GCA/004/684/305/GCA_004684305.1_ASM468430v1
Cluster 1	GCA_004684365.1	Bacteria;Pseudomonadota;Gammaproteobacteria;Enterobacterales;Enterobacteriaceae;Enterobacter;Enterobacter roggenkampii	Enterobacter roggenkampii	4851717	98.59	0.51	Human	Completed Genome	ftp://ftp.ncbi.nlm.nih.gov/genomes/all/GCA/004/684/365/GCA_004684365.1_ASM468436v1
Cluster 1	GCA_004792895.1	Bacteria;Pseudomonadota;Gammaproteobacteria;Enterobacterales;Enterobacteriaceae;Escherichia;Escherichia coli	Escherichia coli	64935	99.97	0.04	Animal	Scaffold	ftp://ftp.ncbi.nlm.nih.gov/genomes/all/GCA/004/792/895/GCA_004792895.1_ASM479289v1
Cluster 1	GCA_004801105.1	Bacteria;Pseudomonadota;Gammaproteobacteria;Enterobacterales;Enterobacteriaceae;Citrobacter;Citrobacter freundii	Citrobacter freundii	261533	98.39	2.17	Human	Scaffold	ftp://ftp.ncbi.nlm.nih.gov/genomes/all/GCA/004/801/105/GCA_004801105.1_ASM480110v1
Cluster 1	GCA_004801235.1	Bacteria;Pseudomonadota;Gammaproteobacteria;Enterobacterales;Enterobacteriaceae;Klebsiella;Klebsiella pneumoniae	Klebsiella pneumoniae	5180019	96.82	1.28	Human	Completed Genome	ftp://ftp.ncbi.nlm.nih.gov/genomes/all/GCA/004/801/235/GCA_004801235.1_ASM480123v1
Cluster 1	GCA_004801515.1	Bacteria;Pseudomonadota;Gammaproteobacteria;Enterobacterales;Enterobacteriaceae;Enterobacter;Enterobacter cloacae	Enterobacter cloacae	5191689	97.72	1.22	Environment	Chromosome	ftp://ftp.ncbi.nlm.nih.gov/genomes/all/GCA/004/801/515/GCA_004801515.1_ASM480151v1
Cluster 1	GCA_004801985.1	Bacteria;Pseudomonadota;Gammaproteobacteria;Pasteurellales;Pasteurellaceae;Haemophilus;Haemophilus influenzae	Haemophilus influenzae	245547	99.02	0.02	Human	Scaffold	ftp://ftp.ncbi.nlm.nih.gov/genomes/all/GCA/004/801/985/GCA_004801985.1_ASM480198v1
Cluster 1	GCA_004802065.1	Bacteria;Pseudomonadota;Gammaproteobacteria;Pasteurellales;Pasteurellaceae;Haemophilus;Haemophilus influenzae	Haemophilus influenzae	193886	99.64	0.23	Human	Scaffold	ftp://ftp.ncbi.nlm.nih.gov/genomes/all/GCA/004/802/065/GCA_004802065.1_ASM480206v1
Cluster 1	GCA_004802095.1	Bacteria;Pseudomonadota;Gammaproteobacteria;Pasteurellales;Pasteurellaceae;Haemophilus;Haemophilus influenzae	Haemophilus influenzae	347632	99.66	0.23	Human	Scaffold	ftp://ftp.ncbi.nlm.nih.gov/genomes/all/GCA/004/802/095/GCA_004802095.1_ASM480209v1
Cluster 1	GCA_004802265.1	Bacteria;Pseudomonadota;Gammaproteobacteria;Pasteurellales;Pasteurellaceae;Haemophilus;Haemophilus influenzae	Haemophilus influenzae	349235	98.87	0.07	Human	Scaffold	ftp://ftp.ncbi.nlm.nih.gov/genomes/all/GCA/004/802/265/GCA_004802265.1_ASM480226v1
Cluster 1	GCA_004802295.1	Bacteria;Pseudomonadota;Gammaproteobacteria;Pasteurellales;Pasteurellaceae;Haemophilus;Haemophilus influenzae	Haemophilus influenzae	202852	98.94	0.02	Human	Scaffold	ftp://ftp.ncbi.nlm.nih.gov/genomes/all/GCA/004/802/295/GCA_004802295.1_ASM480229v1
Cluster 1	GCA_004802355.1	Bacteria;Pseudomonadota;Gammaproteobacteria;Pasteurellales;Pasteurellaceae;Haemophilus;Haemophilus influenzae	Haemophilus influenzae	156238	97.58	0.23	Human	Scaffold	ftp://ftp.ncbi.nlm.nih.gov/genomes/all/GCA/004/802/355/GCA_004802355.1_ASM480235v1
Cluster 1	GCA_004802365.1	Bacteria;Pseudomonadota;Gammaproteobacteria;Pasteurellales;Pasteurellaceae;Haemophilus;Haemophilus influenzae	Haemophilus influenzae	138284	98.16	0.86	Human	Scaffold	ftp://ftp.ncbi.nlm.nih.gov/genomes/all/GCA/004/802/365/GCA_004802365.1_ASM480236v1
Cluster 1	GCA_004804375.1	Bacteria;Pseudomonadota;Gammaproteobacteria;Enterobacterales;Enterobacteriaceae;Enterobacter;Enterobacter bugandensis	Enterobacter bugandensis	4766619	99.5	0.03	Human	Completed Genome	ftp://ftp.ncbi.nlm.nih.gov/genomes/all/GCA/004/804/375/GCA_004804375.1_ASM480437v1
Cluster 1	GCA_004804395.1	Bacteria;Pseudomonadota;Gammaproteobacteria;Enterobacterales;Enterobacteriaceae;Enterobacter;Enterobacter bugandensis	Enterobacter bugandensis	4750456	99.5	0.03	Human	Completed Genome	ftp://ftp.ncbi.nlm.nih.gov/genomes/all/GCA/004/804/395/GCA_004804395.1_ASM480439v1
Cluster 1	GCA_005038395.1	Bacteria;Pseudomonadota;Gammaproteobacteria;Enterobacterales;Enterobacteriaceae;Escherichia;Escherichia coli	Escherichia coli	146078	99.62	0.1	Animal	Scaffold	ftp://ftp.ncbi.nlm.nih.gov/genomes/all/GCA/005/038/395/GCA_005038395.1_ASM503839v1
Cluster 1	GCA_005044495.1	Bacteria;Pseudomonadota;Gammaproteobacteria;Enterobacterales;Enterobacteriaceae;Escherichia;Escherichia coli	Escherichia coli	75179	99.95	0.19	Human	Scaffold	ftp://ftp.ncbi.nlm.nih.gov/genomes/all/GCA/005/044/495/GCA_005044495.1_ASM504449v1
Cluster 1	GCA_005381505.1	Bacteria;Pseudomonadota;Gammaproteobacteria;Enterobacterales;Enterobacteriaceae;Escherichia;Escherichia coli	Escherichia coli	123852	99.97	0.04	Animal	Scaffold	ftp://ftp.ncbi.nlm.nih.gov/genomes/all/GCA/005/381/505/GCA_005381505.1_ASM538150v1
Cluster 1	GCA_005383585.1	Bacteria;Pseudomonadota;Gammaproteobacteria;Enterobacterales;Enterobacteriaceae;Escherichia;Escherichia coli	Escherichia coli	120028	99.67	0.04	Animal	Scaffold	ftp://ftp.ncbi.nlm.nih.gov/genomes/all/GCA/005/383/585/GCA_005383585.1_ASM538358v1
Cluster 1	GCA_005383885.1	Bacteria;Pseudomonadota;Gammaproteobacteria;Enterobacterales;Enterobacteriaceae;Escherichia;Escherichia coli	Escherichia coli	89998	99.97	0.14	Animal	Scaffold	ftp://ftp.ncbi.nlm.nih.gov/genomes/all/GCA/005/383/885/GCA_005383885.1_ASM538388v1
Cluster 1	GCA_005384225.1	Bacteria;Pseudomonadota;Gammaproteobacteria;Enterobacterales;Enterobacteriaceae;Escherichia;Escherichia coli	Escherichia coli	54894	99.97	0.24	Animal	Scaffold	ftp://ftp.ncbi.nlm.nih.gov/genomes/all/GCA/005/384/225/GCA_005384225.1_ASM538422v1
Cluster 1	GCA_005384545.1	Bacteria;Pseudomonadota;Gammaproteobacteria;Enterobacterales;Enterobacteriaceae;Escherichia;Escherichia coli	Escherichia coli	291609	99.62	0.14	Human	Scaffold	ftp://ftp.ncbi.nlm.nih.gov/genomes/all/GCA/005/384/545/GCA_005384545.1_ASM538454v1
Cluster 1	GCA_005385565.1	Bacteria;Pseudomonadota;Gammaproteobacteria;Enterobacterales;Enterobacteriaceae;Escherichia;Escherichia coli	Escherichia coli	90871	99.97	0.04	Human	Scaffold	ftp://ftp.ncbi.nlm.nih.gov/genomes/all/GCA/005/385/565/GCA_005385565.1_ASM538556v1
Cluster 1	GCA_005386045.1	Bacteria;Pseudomonadota;Gammaproteobacteria;Enterobacterales;Enterobacteriaceae;Escherichia;Escherichia coli	Escherichia coli	457992	99.97	0.52	Human	Scaffold	ftp://ftp.ncbi.nlm.nih.gov/genomes/all/GCA/005/386/045/GCA_005386045.1_ASM538604v1
Cluster 1	GCA_005386085.1	Bacteria;Pseudomonadota;Gammaproteobacteria;Enterobacterales;Enterobacteriaceae;Escherichia;Escherichia coli	Escherichia coli	102419	99.67	0.15	Human	Scaffold	ftp://ftp.ncbi.nlm.nih.gov/genomes/all/GCA/005/386/085/GCA_005386085.1_ASM538608v1
Cluster 1	GCA_005386505.1	Bacteria;Pseudomonadota;Gammaproteobacteria;Enterobacterales;Enterobacteriaceae;Escherichia;Escherichia coli	Escherichia coli	95950	99.24	0.78	Human	Scaffold	ftp://ftp.ncbi.nlm.nih.gov/genomes/all/GCA/005/386/505/GCA_005386505.1_ASM538650v1
Cluster 1	GCA_005387085.1	Bacteria;Pseudomonadota;Gammaproteobacteria;Enterobacterales;Enterobacteriaceae;Escherichia;Escherichia coli	Escherichia coli	59743	99.97	0.06	Human	Scaffold	ftp://ftp.ncbi.nlm.nih.gov/genomes/all/GCA/005/387/085/GCA_005387085.1_ASM538708v1
Cluster 1	GCA_005388525.1	Bacteria;Pseudomonadota;Gammaproteobacteria;Enterobacterales;Enterobacteriaceae;Escherichia;Escherichia coli	Escherichia coli	91766	99.82	0.3	Human	Scaffold	ftp://ftp.ncbi.nlm.nih.gov/genomes/all/GCA/005/388/525/GCA_005388525.1_ASM538852v1
Cluster 1	GCA_005389085.1	Bacteria;Pseudomonadota;Gammaproteobacteria;Enterobacterales;Enterobacteriaceae;Escherichia;Escherichia coli	Escherichia coli	174079	99.97	0.33	Human	Scaffold	ftp://ftp.ncbi.nlm.nih.gov/genomes/all/GCA/005/389/085/GCA_005389085.1_ASM538908v1
Cluster 1	GCA_005389185.1	Bacteria;Pseudomonadota;Gammaproteobacteria;Enterobacterales;Enterobacteriaceae;Escherichia;Escherichia coli	Escherichia coli	125412	99.97	0.23	Human	Scaffold	ftp://ftp.ncbi.nlm.nih.gov/genomes/all/GCA/005/389/185/GCA_005389185.1_ASM538918v1
Cluster 1	GCA_005390305.1	Bacteria;Pseudomonadota;Gammaproteobacteria;Enterobacterales;Enterobacteriaceae;Escherichia;Escherichia coli	Escherichia coli	84097	99.97	0.36	Animal	Scaffold	ftp://ftp.ncbi.nlm.nih.gov/genomes/all/GCA/005/390/305/GCA_005390305.1_ASM539030v1
Cluster 1	GCA_005391825.1	Bacteria;Pseudomonadota;Gammaproteobacteria;Enterobacterales;Enterobacteriaceae;Escherichia;Escherichia coli	Escherichia coli	326168	99.67	0.04	Animal	Scaffold	ftp://ftp.ncbi.nlm.nih.gov/genomes/all/GCA/005/391/825/GCA_005391825.1_ASM539182v1
Cluster 1	GCA_005396165.1	Bacteria;Pseudomonadota;Gammaproteobacteria;Enterobacterales;Enterobacteriaceae;Escherichia;Escherichia coli	Escherichia coli	134535	99.62	0.1	Animal	Scaffold	ftp://ftp.ncbi.nlm.nih.gov/genomes/all/GCA/005/396/165/GCA_005396165.1_ASM539616v1
Cluster 1	GCA_005396265.1	Bacteria;Pseudomonadota;Gammaproteobacteria;Enterobacterales;Enterobacteriaceae;Escherichia;Escherichia coli	Escherichia coli	116628	99.87	0.04	Animal	Scaffold	ftp://ftp.ncbi.nlm.nih.gov/genomes/all/GCA/005/396/265/GCA_005396265.1_ASM539626v1
Cluster 1	GCA_005399705.1	Bacteria;Pseudomonadota;Gammaproteobacteria;Enterobacterales;Enterobacteriaceae;Escherichia;Escherichia coli	Escherichia coli	175685	99.62	0.14	Animal	Scaffold	ftp://ftp.ncbi.nlm.nih.gov/genomes/all/GCA/005/399/705/GCA_005399705.1_ASM539970v1
Cluster 1	GCA_005400045.1	Bacteria;Pseudomonadota;Gammaproteobacteria;Enterobacterales;Enterobacteriaceae;Escherichia;Escherichia coli	Escherichia coli	328497	100	0.19	Animal	Scaffold	ftp://ftp.ncbi.nlm.nih.gov/genomes/all/GCA/005/400/045/GCA_005400045.1_ASM540004v1
Cluster 1	GCA_005400465.1	Bacteria;Pseudomonadota;Gammaproteobacteria;Enterobacterales;Enterobacteriaceae;Escherichia;Escherichia coli	Escherichia coli	235720	99.97	0.57	Animal	Scaffold	ftp://ftp.ncbi.nlm.nih.gov/genomes/all/GCA/005/400/465/GCA_005400465.1_ASM540046v1
Cluster 1	GCA_005636015.1	Bacteria;Pseudomonadota;Gammaproteobacteria;Vibrionales;Vibrionaceae;Vibrio;Vibrio cholerae	Vibrio cholerae	125747	96.44	1.78	Environment	Scaffold	ftp://ftp.ncbi.nlm.nih.gov/genomes/all/GCA/005/636/015/GCA_005636015.1_ASM563601v1
Cluster 1	GCA_005636045.1	Bacteria;Pseudomonadota;Gammaproteobacteria;Vibrionales;Vibrionaceae;Vibrio;Vibrio cholerae	Vibrio cholerae	270819	98.58	1.38	Environment	Scaffold	ftp://ftp.ncbi.nlm.nih.gov/genomes/all/GCA/005/636/045/GCA_005636045.1_ASM563604v1
Cluster 1	GCA_005636065.1	Bacteria;Pseudomonadota;Gammaproteobacteria;Vibrionales;Vibrionaceae;Vibrio;Vibrio cholerae	Vibrio cholerae	103676	96.58	2.05	Environment	Scaffold	ftp://ftp.ncbi.nlm.nih.gov/genomes/all/GCA/005/636/065/GCA_005636065.1_ASM563606v1
Cluster 1	GCA_006226215.1	Bacteria;Pseudomonadota;Gammaproteobacteria;Aeromonadales;Aeromonadaceae;Aeromonas;Aeromonas dhakensis	Aeromonas dhakensis	200719	99.32	0.25	Human	Scaffold	ftp://ftp.ncbi.nlm.nih.gov/genomes/all/GCA/006/226/215/GCA_006226215.1_ASM622621v1
Cluster 1	GCA_006232065.1	Bacteria;Pseudomonadota;Gammaproteobacteria;Pasteurellales;Pasteurellaceae;Pasteurella;Pasteurella multocida	Pasteurella multocida subsp. multocida	2333292	98.64	0.23	Animal	Completed Genome	ftp://ftp.ncbi.nlm.nih.gov/genomes/all/GCA/006/232/065/GCA_006232065.1_ASM623206v1
Cluster 1	GCA_006243335.1	Bacteria;Pseudomonadota;Gammaproteobacteria;Aeromonadales;Aeromonadaceae;Aeromonas;Aeromonas dhakensis	Aeromonas dhakensis	242574	99.46	0.23	Human	Scaffold	ftp://ftp.ncbi.nlm.nih.gov/genomes/all/GCA/006/243/335/GCA_006243335.1_ASM624333v1
Cluster 1	GCA_006246145.1	Bacteria;Pseudomonadota;Gammaproteobacteria;Aeromonadales;Aeromonadaceae;Aeromonas;Aeromonas dhakensis	Aeromonas dhakensis	131857	99.57	0.35	Human	Scaffold	ftp://ftp.ncbi.nlm.nih.gov/genomes/all/GCA/006/246/145/GCA_006246145.1_ASM624614v1
Cluster 1	GCA_006246155.1	Bacteria;Pseudomonadota;Gammaproteobacteria;Aeromonadales;Aeromonadaceae;Aeromonas;Aeromonas dhakensis	Aeromonas dhakensis	172691	99.86	0.87	Human	Scaffold	ftp://ftp.ncbi.nlm.nih.gov/genomes/all/GCA/006/246/155/GCA_006246155.1_ASM624615v1
Cluster 1	GCA_006246165.1	Bacteria;Pseudomonadota;Gammaproteobacteria;Aeromonadales;Aeromonadaceae;Aeromonas;Aeromonas veronii	Aeromonas veronii	215038	99.06	1.15	Human	Scaffold	ftp://ftp.ncbi.nlm.nih.gov/genomes/all/GCA/006/246/165/GCA_006246165.1_ASM624616v1
Cluster 1	GCA_006246175.1	Bacteria;Pseudomonadota;Gammaproteobacteria;Aeromonadales;Aeromonadaceae;Aeromonas;Aeromonas veronii	Aeromonas veronii	115181	99.11	0.93	Human	Scaffold	ftp://ftp.ncbi.nlm.nih.gov/genomes/all/GCA/006/246/175/GCA_006246175.1_ASM624617v1
Cluster 1	GCA_006246235.1	Bacteria;Pseudomonadota;Gammaproteobacteria;Aeromonadales;Aeromonadaceae;Aeromonas;Aeromonas veronii	Aeromonas veronii	215278	98.81	1.27	Animal	Scaffold	ftp://ftp.ncbi.nlm.nih.gov/genomes/all/GCA/006/246/235/GCA_006246235.1_ASM624623v1
Cluster 1	GCA_006246275.1	Bacteria;Pseudomonadota;Gammaproteobacteria;Aeromonadales;Aeromonadaceae;Aeromonas;Aeromonas veronii	Aeromonas veronii	108450	98.42	1.4	Human	Scaffold	ftp://ftp.ncbi.nlm.nih.gov/genomes/all/GCA/006/246/275/GCA_006246275.1_ASM624627v1
Cluster 1	GCA_006246485.1	Bacteria;Pseudomonadota;Gammaproteobacteria;Aeromonadales;Aeromonadaceae;Aeromonas;Aeromonas veronii	Aeromonas veronii	126933	98.87	1.13	Animal	Scaffold	ftp://ftp.ncbi.nlm.nih.gov/genomes/all/GCA/006/246/485/GCA_006246485.1_ASM624648v1
Cluster 1	GCA_006246495.1	Bacteria;Pseudomonadota;Gammaproteobacteria;Aeromonadales;Aeromonadaceae;Aeromonas;Aeromonas veronii	Aeromonas veronii	260691	99.32	2.67	Human	Scaffold	ftp://ftp.ncbi.nlm.nih.gov/genomes/all/GCA/006/246/495/GCA_006246495.1_ASM624649v1
Cluster 1	GCA_006246515.1	Bacteria;Pseudomonadota;Gammaproteobacteria;Aeromonadales;Aeromonadaceae;Aeromonas;Aeromonas veronii	Aeromonas veronii	412126	99.34	1.66	Environment	Scaffold	ftp://ftp.ncbi.nlm.nih.gov/genomes/all/GCA/006/246/515/GCA_006246515.1_ASM624651v1
Cluster 1	GCA_006246555.1	Bacteria;Pseudomonadota;Gammaproteobacteria;Aeromonadales;Aeromonadaceae;Aeromonas;Aeromonas veronii	Aeromonas veronii	105208	98.68	0.98	Environment	Scaffold	ftp://ftp.ncbi.nlm.nih.gov/genomes/all/GCA/006/246/555/GCA_006246555.1_ASM624655v1
Cluster 1	GCA_006381975.1	Bacteria;Pseudomonadota;Gammaproteobacteria;Enterobacterales;Enterobacteriaceae;Escherichia;Escherichia coli	Escherichia coli	125938	97.93	0.19	Human	Scaffold	ftp://ftp.ncbi.nlm.nih.gov/genomes/all/GCA/006/381/975/GCA_006381975.1_ASM638197v1
Cluster 1	GCA_006382645.1	Bacteria;Pseudomonadota;Gammaproteobacteria;Vibrionales;Vibrionaceae;Vibrio;Vibrio parahaemolyticus	Vibrio parahaemolyticus	239329	98.59	1.37	Animal	Scaffold	ftp://ftp.ncbi.nlm.nih.gov/genomes/all/GCA/006/382/645/GCA_006382645.1_ASM638264v1
Cluster 1	GCA_006382755.1	Bacteria;Pseudomonadota;Gammaproteobacteria;Vibrionales;Vibrionaceae;Vibrio;Vibrio parahaemolyticus	Vibrio parahaemolyticus	523046	98.72	0.65	Human	Scaffold	ftp://ftp.ncbi.nlm.nih.gov/genomes/all/GCA/006/382/755/GCA_006382755.1_ASM638275v1
Cluster 1	GCA_006382925.1	Bacteria;Pseudomonadota;Gammaproteobacteria;Vibrionales;Vibrionaceae;Vibrio;Vibrio parahaemolyticus	Vibrio parahaemolyticus	338335	98.58	1.47	Animal	Scaffold	ftp://ftp.ncbi.nlm.nih.gov/genomes/all/GCA/006/382/925/GCA_006382925.1_ASM638292v1
Cluster 1	GCA_006383215.1	Bacteria;Pseudomonadota;Gammaproteobacteria;Vibrionales;Vibrionaceae;Vibrio;Vibrio parahaemolyticus	Vibrio parahaemolyticus	529796	99.88	0.56	Human	Scaffold	ftp://ftp.ncbi.nlm.nih.gov/genomes/all/GCA/006/383/215/GCA_006383215.1_ASM638321v1
Cluster 1	GCA_006711125.1	Bacteria;Pseudomonadota;Gammaproteobacteria;Enterobacterales;Yersiniaceae;Serratia;Serratia marcescens	Serratia marcescens	5307451	99.8	0.45	Human	Completed Genome	ftp://ftp.ncbi.nlm.nih.gov/genomes/all/GCA/006/711/125/GCA_006711125.1_ASM671112v1
Cluster 1	GCA_006711525.1	Bacteria;Pseudomonadota;Gammaproteobacteria;Enterobacterales;Yersiniaceae;Serratia;Serratia marcescens	Serratia marcescens	5271698	99.38	0.15	Human	Completed Genome	ftp://ftp.ncbi.nlm.nih.gov/genomes/all/GCA/006/711/525/GCA_006711525.1_ASM671152v1
Cluster 1	GCA_006970665.1	Bacteria;Pseudomonadota;Gammaproteobacteria;Enterobacterales;Yersiniaceae;Serratia;Serratia liquefaciens	Serratia liquefaciens	5706987	99.89	1.19	Enironment	Completed Genome	ftp://ftp.ncbi.nlm.nih.gov/genomes/all/GCA/006/970/665/GCA_006970665.1_ASM697066v1
Cluster 1	GCA_007004285.1	Bacteria;Pseudomonadota;Gammaproteobacteria;Enterobacterales;Enterobacteriaceae;Citrobacter;Citrobacter youngae	Citrobacter youngae	106909	99.31	1.53	Human	Scaffold	ftp://ftp.ncbi.nlm.nih.gov/genomes/all/GCA/007/004/285/GCA_007004285.1_ASM700428v1
Cluster 1	GCA_007035645.1	Bacteria;Pseudomonadota;Gammaproteobacteria;Enterobacterales;Enterobacteriaceae;Enterobacter;Enterobacter asburiae	Enterobacter asburiae	4639748	99.97	0.33	Human	Completed Genome	ftp://ftp.ncbi.nlm.nih.gov/genomes/all/GCA/007/035/645/GCA_007035645.1_ASM703564v1
Cluster 1	GCA_007109445.1	Bacteria;Pseudomonadota;Gammaproteobacteria;Enterobacterales;Enterobacteriaceae;Escherichia;Escherichia coli	Escherichia coli	4934534	99.24	0.52	Human	Chromosome	ftp://ftp.ncbi.nlm.nih.gov/genomes/all/GCA/007/109/445/GCA_007109445.1_ASM710944v1
Cluster 1	GCA_007179295.1	Bacteria;Pseudomonadota;Gammaproteobacteria;Aeromonadales;Aeromonadaceae;Aeromonas;Aeromonas caviae	Aeromonas caviae	4684096	99.45	0.9	Environment	Completed Genome	ftp://ftp.ncbi.nlm.nih.gov/genomes/all/GCA/007/179/295/GCA_007179295.1_ASM717929v1
Cluster 1	GCA_007421845.1	Bacteria;Pseudomonadota;Gammaproteobacteria;Enterobacterales;Enterobacteriaceae;Enterobacter;Enterobacter hormaechei	Enterobacter hormaechei	109760	99.47	0.21	Human	Scaffold	ftp://ftp.ncbi.nlm.nih.gov/genomes/all/GCA/007/421/845/GCA_007421845.1_ASM742184v1
Cluster 1	GCA_007632255.1	Bacteria;Pseudomonadota;Gammaproteobacteria;Enterobacterales;Enterobacteriaceae;Klebsiella;Klebsiella aerogenes	Klebsiella aerogenes	5183422	95.86	1.78	Human	Completed Genome	ftp://ftp.ncbi.nlm.nih.gov/genomes/all/GCA/007/632/255/GCA_007632255.1_ASM763225v1
Cluster 1	GCA_007654995.1	Bacteria;Pseudomonadota;Gammaproteobacteria;Aeromonadales;Aeromonadaceae;Aeromonas;Aeromonas veronii	Aeromonas veronii	282522	98.66	1.93	Animal	Scaffold	ftp://ftp.ncbi.nlm.nih.gov/genomes/all/GCA/007/654/995/GCA_007654995.1_ASM765499v1
Cluster 1	GCA_007672475.1	Bacteria;Pseudomonadota;Gammaproteobacteria;Enterobacterales;Erwiniaceae;Pantoea;Pantoea agglomerans	Pantoea agglomerans	441430	100	0.25	Environment	Scaffold	ftp://ftp.ncbi.nlm.nih.gov/genomes/all/GCA/007/672/475/GCA_007672475.1_ASM767247v1
Cluster 1	GCA_007679955.1	Bacteria;Pseudomonadota;Gammaproteobacteria;Enterobacterales;Erwiniaceae;Pantoea;Pantoea agglomerans	Pantoea agglomerans	569616	99.6	0.37	Environment	Scaffold	ftp://ftp.ncbi.nlm.nih.gov/genomes/all/GCA/007/679/955/GCA_007679955.1_ASM767995v1
Cluster 1	GCA_008086385.1	Bacteria;Pseudomonadota;Gammaproteobacteria;Pasteurellales;Pasteurellaceae;Aggregatibacter;Aggregatibacter actinomycetemcomitans	Aggregatibacter actinomycetemcomitans	2298901	96.2	0.53	Human	Completed Genome	ftp://ftp.ncbi.nlm.nih.gov/genomes/all/GCA/008/086/385/GCA_008086385.1_ASM808638v1
Cluster 1	GCA_008120185.1	Bacteria;Pseudomonadota;Gammaproteobacteria;Enterobacterales;Enterobacteriaceae;Enterobacter;Enterobacter hormaechei	Enterobacter hormaechei	161104	99.87	0.55	Human	Scaffold	ftp://ftp.ncbi.nlm.nih.gov/genomes/all/GCA/008/120/185/GCA_008120185.1_ASM812018v1
Cluster 1	GCA_008271565.1	Bacteria;Pseudomonadota;Gammaproteobacteria;Vibrionales;Vibrionaceae;Vibrio;Vibrio alginolyticus	Vibrio alginolyticus	268980	99.93	0.05	Animal	Scaffold	ftp://ftp.ncbi.nlm.nih.gov/genomes/all/GCA/008/271/565/GCA_008271565.1_ASM827156v1
Cluster 1	GCA_008273915.1	Bacteria;Pseudomonadota;Gammaproteobacteria;Enterobacterales;Enterobacteriaceae;Escherichia;Escherichia coli	Escherichia coli	128928	100	0.07	Animal	Scaffold	ftp://ftp.ncbi.nlm.nih.gov/genomes/all/GCA/008/273/915/GCA_008273915.1_ASM827391v1
Cluster 1	GCA_008365235.1	Bacteria;Pseudomonadota;Gammaproteobacteria;Enterobacterales;Enterobacteriaceae;Enterobacter;Enterobacter kobei	Enterobacter kobei	4801031	98.75	1.29	Human	Completed Genome	ftp://ftp.ncbi.nlm.nih.gov/genomes/all/GCA/008/365/235/GCA_008365235.1_ASM836523v1
Cluster 1	GCA_008369605.1	Bacteria;Pseudomonadota;Gammaproteobacteria;Vibrionales;Vibrionaceae;Vibrio;Vibrio cholerae	Vibrio cholerae	2948589	99.96	0.06	Environment	Completed Genome	ftp://ftp.ncbi.nlm.nih.gov/genomes/all/GCA/008/369/605/GCA_008369605.1_ASM836960v1
Cluster 1	GCA_008369625.1	Bacteria;Pseudomonadota;Gammaproteobacteria;Vibrionales;Vibrionaceae;Vibrio;Vibrio cholerae	Vibrio cholerae	3162181	99.98	0.03	Environment	Completed Genome	ftp://ftp.ncbi.nlm.nih.gov/genomes/all/GCA/008/369/625/GCA_008369625.1_ASM836962v1
Cluster 1	GCA_008586745.1	Bacteria;Pseudomonadota;Gammaproteobacteria;Pasteurellales;Pasteurellaceae;Haemophilus;Haemophilus influenzae	Haemophilus influenzae biotype aegyptius	1985844	98.96	0.09	Human	Completed Genome	ftp://ftp.ncbi.nlm.nih.gov/genomes/all/GCA/008/586/745/GCA_008586745.1_ASM858674v1
Cluster 1	GCA_008640725.1	Bacteria;Pseudomonadota;Gammaproteobacteria;Enterobacterales;Enterobacteriaceae;Enterobacter;Enterobacter hormaechei	Enterobacter hormaechei	243065	99.87	1.08	Human	Scaffold	ftp://ftp.ncbi.nlm.nih.gov/genomes/all/GCA/008/640/725/GCA_008640725.1_ASM864072v1
Cluster 1	GCA_008640875.1	Bacteria;Pseudomonadota;Gammaproteobacteria;Enterobacterales;Enterobacteriaceae;Enterobacter;Enterobacter bugandensis	Enterobacter bugandensis	2475128	99.36	0.92	Human	Scaffold	ftp://ftp.ncbi.nlm.nih.gov/genomes/all/GCA/008/640/875/GCA_008640875.1_ASM864087v1
Cluster 1	GCA_008641815.1	Bacteria;Pseudomonadota;Gammaproteobacteria;Enterobacterales;Enterobacteriaceae;Enterobacter;Enterobacter ludwigii	Enterobacter ludwigii	203750	99.48	0.91	Human	Scaffold	ftp://ftp.ncbi.nlm.nih.gov/genomes/all/GCA/008/641/815/GCA_008641815.1_ASM864181v1
Cluster 1	GCA_008641835.1	Bacteria;Pseudomonadota;Gammaproteobacteria;Enterobacterales;Enterobacteriaceae;Enterobacter;Enterobacter roggenkampii	Enterobacter roggenkampii	201558	99.15	0.56	Human	Scaffold	ftp://ftp.ncbi.nlm.nih.gov/genomes/all/GCA/008/641/835/GCA_008641835.1_ASM864183v1
Cluster 1	GCA_008641845.1	Bacteria;Pseudomonadota;Gammaproteobacteria;Enterobacterales;Enterobacteriaceae;Enterobacter;Enterobacter roggenkampii	Enterobacter roggenkampii	201546	99.15	0.56	Human	Scaffold	ftp://ftp.ncbi.nlm.nih.gov/genomes/all/GCA/008/641/845/GCA_008641845.1_ASM864184v1
Cluster 1	GCA_008642005.1	Bacteria;Pseudomonadota;Gammaproteobacteria;Enterobacterales;Enterobacteriaceae;Enterobacter;Enterobacter hormaechei	Enterobacter hormaechei	137447	99.92	0.28	Human	Scaffold	ftp://ftp.ncbi.nlm.nih.gov/genomes/all/GCA/008/642/005/GCA_008642005.1_ASM864200v1
Cluster 1	GCA_008693625.1	Bacteria;Pseudomonadota;Gammaproteobacteria;Vibrionales;Vibrionaceae;Vibrio;Vibrio parahaemolyticus	Vibrio parahaemolyticus	3260755	98.03	0.84	Human	Completed Genome	ftp://ftp.ncbi.nlm.nih.gov/genomes/all/GCA/008/693/625/GCA_008693625.1_ASM869362v1
Cluster 1	GCA_008693685.1	Bacteria;Pseudomonadota;Gammaproteobacteria;Vibrionales;Vibrionaceae;Vibrio;Vibrio vulnificus	Vibrio vulnificus	3249353	98.07	1.34	Human	Completed Genome	ftp://ftp.ncbi.nlm.nih.gov/genomes/all/GCA/008/693/685/GCA_008693685.1_ASM869368v1
Cluster 1	GCA_008693705.1	Bacteria;Pseudomonadota;Gammaproteobacteria;Aeromonadales;Aeromonadaceae;Aeromonas;Aeromonas veronii	Aeromonas veronii	4559061	99.61	1.82	Human	Completed Genome	ftp://ftp.ncbi.nlm.nih.gov/genomes/all/GCA/008/693/705/GCA_008693705.1_ASM869370v1
Cluster 1	GCA_008693845.1	Bacteria;Pseudomonadota;Gammaproteobacteria;Pasteurellales;Pasteurellaceae;Pasteurella;Pasteurella multocida	Pasteurella multocida	2250063	99.55	0	Human	Completed Genome	ftp://ftp.ncbi.nlm.nih.gov/genomes/all/GCA/008/693/845/GCA_008693845.1_ASM869384v1
Cluster 1	GCA_008693885.1	Bacteria;Pseudomonadota;Gammaproteobacteria;Enterobacterales;Enterobacteriaceae;Klebsiella;Klebsiella aerogenes	Klebsiella aerogenes	5286332	98.1	0.51	Human	Completed Genome	ftp://ftp.ncbi.nlm.nih.gov/genomes/all/GCA/008/693/885/GCA_008693885.1_ASM869388v1
Cluster 1	GCA_008727695.1	Bacteria;Pseudomonadota;Gammaproteobacteria;Enterobacterales;Enterobacteriaceae;Klebsiella;Klebsiella aerogenes	Klebsiella aerogenes	5059877	99.57	0.38	Human	Completed Genome	ftp://ftp.ncbi.nlm.nih.gov/genomes/all/GCA/008/727/695/GCA_008727695.1_ASM872769v1
Cluster 1	GCA_008802295.1	Bacteria;Pseudomonadota;Gammaproteobacteria;Aeromonadales;Aeromonadaceae;Aeromonas;Aeromonas caviae	Aeromonas caviae	72801	99.78	0.5	Environment	Scaffold	ftp://ftp.ncbi.nlm.nih.gov/genomes/all/GCA/008/802/295/GCA_008802295.1_ASM880229v1
Cluster 1	GCA_008802305.1	Bacteria;Pseudomonadota;Gammaproteobacteria;Aeromonadales;Aeromonadaceae;Aeromonas;Aeromonas veronii	Aeromonas veronii	54053	98.43	2.42	Environment	Scaffold	ftp://ftp.ncbi.nlm.nih.gov/genomes/all/GCA/008/802/305/GCA_008802305.1_ASM880230v1
Cluster 1	GCA_008830745.1	Bacteria;Pseudomonadota;Gammaproteobacteria;Enterobacterales;Yersiniaceae;Serratia;Serratia marcescens	Serratia marcescens	287012	99.86	0	Human	Scaffold	ftp://ftp.ncbi.nlm.nih.gov/genomes/all/GCA/008/830/745/GCA_008830745.1_ASM883074v1
Cluster 1	GCA_008931665.1	Bacteria;Pseudomonadota;Gammaproteobacteria;Enterobacterales;Enterobacteriaceae;Klebsiella;Klebsiella aerogenes	Klebsiella aerogenes	5034705	96.51	3.33	Human	Completed Genome	ftp://ftp.ncbi.nlm.nih.gov/genomes/all/GCA/008/931/665/GCA_008931665.1_ASM893166v1
Cluster 1	GCA_009036245.1	Bacteria;Pseudomonadota;Gammaproteobacteria;Enterobacterales;Enterobacteriaceae;Enterobacter;Enterobacter sichuanensis	Enterobacter sichuanensis	4711389	99.23	0.9	Environment	Completed Genome	ftp://ftp.ncbi.nlm.nih.gov/genomes/all/GCA/009/036/245/GCA_009036245.1_ASM903624v1
Cluster 1	GCA_009184765.2	Bacteria;Pseudomonadota;Gammaproteobacteria;Enterobacterales;Enterobacteriaceae;Enterobacter;Enterobacter roggenkampii	Enterobacter roggenkampii	4872204	98.78	0.75	Human	Completed Genome	ftp://ftp.ncbi.nlm.nih.gov/genomes/all/GCA/009/184/765/GCA_009184765.2_ASM918476v2
Cluster 1	GCA_009394435.1	Bacteria;Pseudomonadota;Gammaproteobacteria;Enterobacterales;Enterobacteriaceae;Escherichia;Escherichia coli	Escherichia coli	270757	97.51	0.57	Animal	Scaffold	ftp://ftp.ncbi.nlm.nih.gov/genomes/all/GCA/009/394/435/GCA_009394435.1_ASM939443v1
Cluster 1	GCA_009394585.1	Bacteria;Pseudomonadota;Gammaproteobacteria;Enterobacterales;Enterobacteriaceae;Escherichia;Escherichia coli	Escherichia coli	62784	95.04	3.41	Human	Scaffold	ftp://ftp.ncbi.nlm.nih.gov/genomes/all/GCA/009/394/585/GCA_009394585.1_ASM939458v1
Cluster 1	GCA_009618015.1	Bacteria;Pseudomonadota;Gammaproteobacteria;Enterobacterales;Enterobacteriaceae;Escherichia;Escherichia coli	Escherichia coli O8:H8	4800098	99.47	0.2	Human	Completed Genome	ftp://ftp.ncbi.nlm.nih.gov/genomes/all/GCA/009/618/015/GCA_009618015.1_ASM961801v1
Cluster 1	GCA_009647465.1	Bacteria;Pseudomonadota;Gammaproteobacteria;Enterobacterales;Enterobacteriaceae;Escherichia;Escherichia coli	Escherichia coli	123396	98.15	0.77	Animal	Scaffold	ftp://ftp.ncbi.nlm.nih.gov/genomes/all/GCA/009/647/465/GCA_009647465.1_ASM964746v1
Cluster 1	GCA_009647485.1	Bacteria;Pseudomonadota;Gammaproteobacteria;Enterobacterales;Enterobacteriaceae;Enterobacter;Enterobacter bugandensis	Enterobacter bugandensis	363107	98.48	0.08	Animal	Scaffold	ftp://ftp.ncbi.nlm.nih.gov/genomes/all/GCA/009/647/485/GCA_009647485.1_ASM964748v1
Cluster 1	GCA_009648455.1	Bacteria;Pseudomonadota;Gammaproteobacteria;Enterobacterales;Enterobacteriaceae;Enterobacter;Enterobacter cancerogenus	Enterobacter cancerogenus	434417	97.87	0.71	Animal	Scaffold	ftp://ftp.ncbi.nlm.nih.gov/genomes/all/GCA/009/648/455/GCA_009648455.1_ASM964845v1
Cluster 1	GCA_009659755.1	Bacteria;Pseudomonadota;Gammaproteobacteria;Enterobacterales;Enterobacteriaceae;Enterobacter;Enterobacter ludwigii	Enterobacter ludwigii	129134	96.17	0.35	Environment	Scaffold	ftp://ftp.ncbi.nlm.nih.gov/genomes/all/GCA/009/659/755/GCA_009659755.1_ASM965975v1
Cluster 1	GCA_009664025.1	Bacteria;Pseudomonadota;Gammaproteobacteria;Enterobacterales;Enterobacteriaceae;Citrobacter;Citrobacter freundii	Citrobacter freundii	5143118	99.4	0.08	Human	Completed Genome	ftp://ftp.ncbi.nlm.nih.gov/genomes/all/GCA/009/664/025/GCA_009664025.1_ASM966402v1
Cluster 1	GCA_009707385.1	Bacteria;Pseudomonadota;Gammaproteobacteria;Enterobacterales;Enterobacteriaceae;Klebsiella;Klebsiella oxytoca	Klebsiella oxytoca	5394761	96.11	1.82	Environment	Completed Genome	ftp://ftp.ncbi.nlm.nih.gov/genomes/all/GCA/009/707/385/GCA_009707385.1_ASM970738v1
Cluster 1	GCA_009738005.1	Bacteria;Pseudomonadota;Gammaproteobacteria;Vibrionales;Vibrionaceae;Vibrio;Vibrio parahaemolyticus	Vibrio parahaemolyticus	348535	98.61	3.02	Animal	Scaffold	ftp://ftp.ncbi.nlm.nih.gov/genomes/all/GCA/009/738/005/GCA_009738005.1_ASM973800v1
Cluster 1	GCA_009738025.1	Bacteria;Pseudomonadota;Gammaproteobacteria;Vibrionales;Vibrionaceae;Vibrio;Vibrio parahaemolyticus	Vibrio parahaemolyticus	814464	97.85	1.07	Animal	Scaffold	ftp://ftp.ncbi.nlm.nih.gov/genomes/all/GCA/009/738/025/GCA_009738025.1_ASM973802v1
Cluster 1	GCA_009755745.1	Bacteria;Pseudomonadota;Gammaproteobacteria;Aeromonadales;Aeromonadaceae;Aeromonas;Aeromonas veronii	Aeromonas veronii	4604603	98.27	1.79	Animal	Completed Genome	ftp://ftp.ncbi.nlm.nih.gov/genomes/all/GCA/009/755/745/GCA_009755745.1_ASM975574v1
Cluster 1	GCA_009765635.1	Bacteria;Pseudomonadota;Gammaproteobacteria;Aeromonadales;Aeromonadaceae;Aeromonas;Aeromonas veronii	Aeromonas veronii	290712	98.63	2.88	Animal	Scaffold	ftp://ftp.ncbi.nlm.nih.gov/genomes/all/GCA/009/765/635/GCA_009765635.1_ASM976563v1
Cluster 1	GCA_009765645.1	Bacteria;Pseudomonadota;Gammaproteobacteria;Aeromonadales;Aeromonadaceae;Aeromonas;Aeromonas veronii	Aeromonas veronii	284404	98.62	2.13	Animal	Scaffold	ftp://ftp.ncbi.nlm.nih.gov/genomes/all/GCA/009/765/645/GCA_009765645.1_ASM976564v1
Cluster 1	GCA_009821375.1	Bacteria;Pseudomonadota;Gammaproteobacteria;Enterobacterales;Enterobacteriaceae;Citrobacter;Citrobacter braakii	Citrobacter braakii	329069	99.58	3.06	Animal	Scaffold	ftp://ftp.ncbi.nlm.nih.gov/genomes/all/GCA/009/821/375/GCA_009821375.1_ASM982137v1
Cluster 1	GCA_009821555.1	Bacteria;Pseudomonadota;Gammaproteobacteria;Enterobacterales;Enterobacteriaceae;Citrobacter;Citrobacter braakii	Citrobacter braakii	245302	99.35	3.99	Animal	Scaffold	ftp://ftp.ncbi.nlm.nih.gov/genomes/all/GCA/009/821/555/GCA_009821555.1_ASM982155v1
Cluster 1	GCA_009821575.1	Bacteria;Pseudomonadota;Gammaproteobacteria;Enterobacterales;Enterobacteriaceae;Enterobacter;Enterobacter roggenkampii	Enterobacter roggenkampii	526172	99.5	0.08	Animal	Scaffold	ftp://ftp.ncbi.nlm.nih.gov/genomes/all/GCA/009/821/575/GCA_009821575.1_ASM982157v1
Cluster 1	GCA_009832555.1	Bacteria;Pseudomonadota;Gammaproteobacteria;Enterobacterales;Enterobacteriaceae;Enterobacter;Enterobacter hormaechei	Enterobacter hormaechei	522725	99.47	0.92	Human	Scaffold	ftp://ftp.ncbi.nlm.nih.gov/genomes/all/GCA/009/832/555/GCA_009832555.1_ASM983255v1
Cluster 1	GCA_009833025.1	Bacteria;Pseudomonadota;Gammaproteobacteria;Aeromonadales;Aeromonadaceae;Aeromonas;Aeromonas veronii	Aeromonas veronii	4744657	100	0.03	Animal	Completed Genome	ftp://ftp.ncbi.nlm.nih.gov/genomes/all/GCA/009/833/025/GCA_009833025.1_ASM983302v1
Cluster 1	GCA_009834065.1	Bacteria;Pseudomonadota;Gammaproteobacteria;Aeromonadales;Aeromonadaceae;Aeromonas;Aeromonas veronii	Aeromonas veronii	4807642	98.5	1.86	Animal	Completed Genome	ftp://ftp.ncbi.nlm.nih.gov/genomes/all/GCA/009/834/065/GCA_009834065.1_ASM983406v1
Cluster 1	GCA_009834305.1	Bacteria;Pseudomonadota;Gammaproteobacteria;Enterobacterales;Yersiniaceae;Serratia;Serratia marcescens	Serratia marcescens	5276341	96.54	4.4	Animal	Completed Genome	ftp://ftp.ncbi.nlm.nih.gov/genomes/all/GCA/009/834/305/GCA_009834305.1_ASM983430v1
Cluster 1	GCA_009883835.1	Bacteria;Pseudomonadota;Gammaproteobacteria;Vibrionales;Vibrionaceae;Vibrio;Vibrio parahaemolyticus	Vibrio parahaemolyticus	3421899	98.07	2.3	Animal	Completed Genome	ftp://ftp.ncbi.nlm.nih.gov/genomes/all/GCA/009/883/835/GCA_009883835.1_ASM988383v1
Cluster 1	GCA_009883895.1	Bacteria;Pseudomonadota;Gammaproteobacteria;Vibrionales;Vibrionaceae;Vibrio;Vibrio parahaemolyticus	Vibrio parahaemolyticus	3491101	96.82	1.44	Animal	Completed Genome	ftp://ftp.ncbi.nlm.nih.gov/genomes/all/GCA/009/883/895/GCA_009883895.1_ASM988389v1
Cluster 1	GCA_009898965.1	Bacteria;Pseudomonadota;Gammaproteobacteria;Enterobacterales;Enterobacteriaceae;Escherichia;Escherichia coli	Escherichia coli	248392	98.26	0.72	Animal	Scaffold	ftp://ftp.ncbi.nlm.nih.gov/genomes/all/GCA/009/898/965/GCA_009898965.1_ASM989896v1
Cluster 1	GCA_009905865.1	Bacteria;Pseudomonadota;Gammaproteobacteria;Aeromonadales;Aeromonadaceae;Aeromonas;Aeromonas caviae	Aeromonas caviae	69153	97.64	0.94	Human	Scaffold	ftp://ftp.ncbi.nlm.nih.gov/genomes/all/GCA/009/905/865/GCA_009905865.1_ASM990586v1
Cluster 1	GCA_009906335.1	Bacteria;Pseudomonadota;Gammaproteobacteria;Aeromonadales;Aeromonadaceae;Aeromonas;Aeromonas caviae	Aeromonas caviae	60422	97.63	0.36	Human	Scaffold	ftp://ftp.ncbi.nlm.nih.gov/genomes/all/GCA/009/906/335/GCA_009906335.1_ASM990633v1
Cluster 1	GCA_009910785.1	Bacteria;Pseudomonadota;Gammaproteobacteria;Enterobacterales;Enterobacteriaceae;Citrobacter;Citrobacter freundii	Citrobacter freundii	473272	95.38	3.82	Environment	Scaffold	ftp://ftp.ncbi.nlm.nih.gov/genomes/all/GCA/009/910/785/GCA_009910785.1_ASM991078v1
Cluster 1	GCA_009931135.1	Bacteria;Pseudomonadota;Gammaproteobacteria;Aeromonadales;Aeromonadaceae;Aeromonas;Aeromonas media	Aeromonas media	4710838	98.18	0.86	Environment	Completed Genome	ftp://ftp.ncbi.nlm.nih.gov/genomes/all/GCA/009/931/135/GCA_009931135.1_ASM993113v1
Cluster 1	GCA_009938405.1	Bacteria;Pseudomonadota;Gammaproteobacteria;Enterobacterales;Enterobacteriaceae;Cronobacter;Cronobacter malonaticus	Cronobacter malonaticus	132973	95.09	0.26	Environment	Scaffold	ftp://ftp.ncbi.nlm.nih.gov/genomes/all/GCA/009/938/405/GCA_009938405.1_ASM993840v1
Cluster 1	GCA_009938455.1	Bacteria;Pseudomonadota;Gammaproteobacteria;Enterobacterales;Enterobacteriaceae;Cronobacter;Cronobacter sakazakii	Cronobacter sakazakii	238158	99.97	0.33	Human	Scaffold	ftp://ftp.ncbi.nlm.nih.gov/genomes/all/GCA/009/938/455/GCA_009938455.1_ASM993845v1
Cluster 1	GCA_009938535.1	Bacteria;Pseudomonadota;Gammaproteobacteria;Enterobacterales;Enterobacteriaceae;Cronobacter;Cronobacter dublinensis	Cronobacter dublinensis	342171	95.72	0.69	Environment	Scaffold	ftp://ftp.ncbi.nlm.nih.gov/genomes/all/GCA/009/938/535/GCA_009938535.1_ASM993853v1
Cluster 1	GCA_009938585.1	Bacteria;Pseudomonadota;Gammaproteobacteria;Enterobacterales;Enterobacteriaceae;Cronobacter;Cronobacter sakazakii	Cronobacter sakazakii	535328	99.97	0.19	Environment	Scaffold	ftp://ftp.ncbi.nlm.nih.gov/genomes/all/GCA/009/938/585/GCA_009938585.1_ASM993858v1
Cluster 1	GCA_009938605.1	Bacteria;Pseudomonadota;Gammaproteobacteria;Enterobacterales;Enterobacteriaceae;Cronobacter;Cronobacter malonaticus	Cronobacter malonaticus	190290	95.79	3.89	Environment	Scaffold	ftp://ftp.ncbi.nlm.nih.gov/genomes/all/GCA/009/938/605/GCA_009938605.1_ASM993860v1
Cluster 1	GCA_009938655.1	Bacteria;Pseudomonadota;Gammaproteobacteria;Enterobacterales;Enterobacteriaceae;Cronobacter;Cronobacter malonaticus	Cronobacter malonaticus	215823	95.6	1.19	Environment	Scaffold	ftp://ftp.ncbi.nlm.nih.gov/genomes/all/GCA/009/938/655/GCA_009938655.1_ASM993865v1
Cluster 1	GCA_009938765.1	Bacteria;Pseudomonadota;Gammaproteobacteria;Enterobacterales;Enterobacteriaceae;Cronobacter;Cronobacter sakazakii	Cronobacter sakazakii	140803	99.93	0.54	Human	Scaffold	ftp://ftp.ncbi.nlm.nih.gov/genomes/all/GCA/009/938/765/GCA_009938765.1_ASM993876v1
Cluster 1	GCA_010183705.1	Bacteria;Pseudomonadota;Gammaproteobacteria;Enterobacterales;Enterobacteriaceae;Klebsiella;Klebsiella pneumoniae	Klebsiella pneumoniae	5129061	97.73	3.28	Human	Chromosome	ftp://ftp.ncbi.nlm.nih.gov/genomes/all/GCA/010/183/705/GCA_010183705.1_ASM1018370v1
Cluster 1	GCA_010443215.1	Bacteria;Pseudomonadota;Gammaproteobacteria;Pasteurellales;Pasteurellaceae;Pasteurella;Pasteurella multocida	Pasteurella multocida	2265748	99.55	0	Animal	Completed Genome	ftp://ftp.ncbi.nlm.nih.gov/genomes/all/GCA/010/443/215/GCA_010443215.1_ASM1044321v1
Cluster 1	GCA_010523255.1	Bacteria;Pseudomonadota;Gammaproteobacteria;Enterobacterales;Erwiniaceae;Pantoea;Pantoea agglomerans	Pantoea agglomerans	4040629	99.63	0.28	Environment	Chromosome	ftp://ftp.ncbi.nlm.nih.gov/genomes/all/GCA/010/523/255/GCA_010523255.1_ASM1052325v1
Cluster 1	GCA_010598465.1	Bacteria;Pseudomonadota;Gammaproteobacteria;Enterobacterales;Enterobacteriaceae;Enterobacter;Enterobacter hormaechei	Enterobacter hormaechei	64031	99.97	2.03	Human	Scaffold	ftp://ftp.ncbi.nlm.nih.gov/genomes/all/GCA/010/598/465/GCA_010598465.1_ASM1059846v1
Cluster 1	GCA_010598485.1	Bacteria;Pseudomonadota;Gammaproteobacteria;Enterobacterales;Enterobacteriaceae;Klebsiella;Klebsiella aerogenes	Klebsiella aerogenes	69009	95.71	3.79	Human	Scaffold	ftp://ftp.ncbi.nlm.nih.gov/genomes/all/GCA/010/598/485/GCA_010598485.1_ASM1059848v1
Cluster 1	GCA_010598495.1	Bacteria;Pseudomonadota;Gammaproteobacteria;Enterobacterales;Enterobacteriaceae;Klebsiella;Klebsiella aerogenes	Klebsiella aerogenes	97692	97.86	0.67	Human	Scaffold	ftp://ftp.ncbi.nlm.nih.gov/genomes/all/GCA/010/598/495/GCA_010598495.1_ASM1059849v1
Cluster 1	GCA_010599005.1	Bacteria;Pseudomonadota;Gammaproteobacteria;Enterobacterales;Enterobacteriaceae;Enterobacter;Enterobacter roggenkampii	Enterobacter roggenkampii	117287	99.6	1.24	Human	Scaffold	ftp://ftp.ncbi.nlm.nih.gov/genomes/all/GCA/010/599/005/GCA_010599005.1_ASM1059900v1
Cluster 1	GCA_010602725.1	Bacteria;Pseudomonadota;Gammaproteobacteria;Enterobacterales;Enterobacteriaceae;Enterobacter;Enterobacter ludwigii	Enterobacter ludwigii	209857	99.25	1.18	Human	Scaffold	ftp://ftp.ncbi.nlm.nih.gov/genomes/all/GCA/010/602/725/GCA_010602725.1_ASM1060272v1
Cluster 1	GCA_010603885.1	Bacteria;Pseudomonadota;Gammaproteobacteria;Pasteurellales;Pasteurellaceae;Haemophilus;Haemophilus influenzae	Haemophilus influenzae	61095	99.52	0.08	Human	Scaffold	ftp://ftp.ncbi.nlm.nih.gov/genomes/all/GCA/010/603/885/GCA_010603885.1_ASM1060388v1
Cluster 1	GCA_010667775.1	Bacteria;Pseudomonadota;Gammaproteobacteria;Enterobacterales;Erwiniaceae;Pantoea;Pantoea agglomerans	Pantoea agglomerans	605029	98.35	0.86	Enironment	Scaffold	ftp://ftp.ncbi.nlm.nih.gov/genomes/all/GCA/010/667/775/GCA_010667775.1_T6
Cluster 1	GCA_010667845.1	Bacteria;Pseudomonadota;Gammaproteobacteria;Enterobacterales;Erwiniaceae;Pantoea;Pantoea agglomerans	Pantoea agglomerans	551948	98.37	0.59	Enironment	Scaffold	ftp://ftp.ncbi.nlm.nih.gov/genomes/all/GCA/010/667/845/GCA_010667845.1_T2
Cluster 1	GCA_010667925.1	Bacteria;Pseudomonadota;Gammaproteobacteria;Enterobacterales;Erwiniaceae;Pantoea;Pantoea agglomerans	Pantoea agglomerans	610154	97.97	0.72	Enironment	Scaffold	ftp://ftp.ncbi.nlm.nih.gov/genomes/all/GCA/010/667/925/GCA_010667925.1_T1
Cluster 1	GCA_010667945.1	Bacteria;Pseudomonadota;Gammaproteobacteria;Enterobacterales;Erwiniaceae;Pantoea;Pantoea agglomerans	Pantoea agglomerans	533500	98.81	0.57	Enironment	Scaffold	ftp://ftp.ncbi.nlm.nih.gov/genomes/all/GCA/010/667/945/GCA_010667945.1_R5
Cluster 1	GCA_010667965.1	Bacteria;Pseudomonadota;Gammaproteobacteria;Enterobacterales;Erwiniaceae;Pantoea;Pantoea agglomerans	Pantoea agglomerans	518825	98.33	1.21	Enironment	Scaffold	ftp://ftp.ncbi.nlm.nih.gov/genomes/all/GCA/010/667/965/GCA_010667965.1_A2
Cluster 1	GCA_010667975.1	Bacteria;Pseudomonadota;Gammaproteobacteria;Enterobacterales;Erwiniaceae;Pantoea;Pantoea agglomerans	Pantoea agglomerans	577213	98.65	2.37	Enironment	Scaffold	ftp://ftp.ncbi.nlm.nih.gov/genomes/all/GCA/010/667/975/GCA_010667975.1_B1
Cluster 1	GCA_010667985.1	Bacteria;Pseudomonadota;Gammaproteobacteria;Enterobacterales;Erwiniaceae;Pantoea;Pantoea agglomerans	Pantoea agglomerans	456717	98.65	2.44	Enironment	Scaffold	ftp://ftp.ncbi.nlm.nih.gov/genomes/all/GCA/010/667/985/GCA_010667985.1_B1
Cluster 1	GCA_010667995.1	Bacteria;Pseudomonadota;Gammaproteobacteria;Enterobacterales;Erwiniaceae;Pantoea;Pantoea agglomerans	Pantoea agglomerans	576160	98.65	0.46	Enironment	Scaffold	ftp://ftp.ncbi.nlm.nih.gov/genomes/all/GCA/010/667/995/GCA_010667995.1_R1
Cluster 1	GCA_010669025.1	Bacteria;Pseudomonadota;Gammaproteobacteria;Enterobacterales;Enterobacteriaceae;Escherichia;Escherichia coli	Escherichia coli	4945561	99.56	0.69	Animal	Completed Genome	ftp://ftp.ncbi.nlm.nih.gov/genomes/all/GCA/010/669/025/GCA_010669025.1_ASM1066902v1
Cluster 1	GCA_010820845.1	Bacteria;Pseudomonadota;Gammaproteobacteria;Enterobacterales;Enterobacteriaceae;Enterobacter;Enterobacter asburiae	Enterobacter asburiae	2351041	99.97	0.33	Environment	Scaffold	ftp://ftp.ncbi.nlm.nih.gov/genomes/all/GCA/010/820/845/GCA_010820845.1_ASM1082084v1
Cluster 1	GCA_011032125.1	Bacteria;Pseudomonadota;Gammaproteobacteria;Enterobacterales;Enterobacteriaceae;Escherichia;Escherichia coli	Escherichia coli	150844	97.69	1.38	Animal	Scaffold	ftp://ftp.ncbi.nlm.nih.gov/genomes/all/GCA/011/032/125/GCA_011032125.1_ASM1103212v1
Cluster 1	GCA_011032545.1	Bacteria;Pseudomonadota;Gammaproteobacteria;Enterobacterales;Enterobacteriaceae;Escherichia;Escherichia coli	Escherichia coli	216462	98.33	0.36	Animal	Scaffold	ftp://ftp.ncbi.nlm.nih.gov/genomes/all/GCA/011/032/545/GCA_011032545.1_ASM1103254v1
Cluster 1	GCA_011045215.1	Bacteria;Pseudomonadota;Gammaproteobacteria;Enterobacterales;Enterobacteriaceae;Escherichia;Escherichia coli	Escherichia coli	5409430	99.49	1.01	Animal	Completed Genome	ftp://ftp.ncbi.nlm.nih.gov/genomes/all/GCA/011/045/215/GCA_011045215.1_ASM1104521v1
Cluster 1	GCA_011045235.1	Bacteria;Pseudomonadota;Gammaproteobacteria;Enterobacterales;Enterobacteriaceae;Escherichia;Escherichia coli	Escherichia coli	4866137	99.46	0.73	Animal	Completed Genome	ftp://ftp.ncbi.nlm.nih.gov/genomes/all/GCA/011/045/235/GCA_011045235.1_ASM1104523v1
Cluster 1	GCA_011149495.1	Bacteria;Pseudomonadota;Gammaproteobacteria;Pasteurellales;Pasteurellaceae;Pasteurella;Pasteurella multocida	Pasteurella multocida	2413993	99.32	0.34	Animal	Completed Genome	ftp://ftp.ncbi.nlm.nih.gov/genomes/all/GCA/011/149/495/GCA_011149495.1_ASM1114949v1
Cluster 1	GCA_011463635.1	Bacteria;Pseudomonadota;Gammaproteobacteria;Enterobacterales;Enterobacteriaceae;Enterobacter;Enterobacter ludwigii	Enterobacter ludwigii	4892375	99.61	0.34	Human	Chromosome	ftp://ftp.ncbi.nlm.nih.gov/genomes/all/GCA/011/463/635/GCA_011463635.1_ASM1146363v1
Cluster 1	GCA_011801435.1	Bacteria;Pseudomonadota;Gammaproteobacteria;Vibrionales;Vibrionaceae;Vibrio;Vibrio alginolyticus	Vibrio alginolyticus	3416391	99.26	0.7	Environment	Completed Genome	ftp://ftp.ncbi.nlm.nih.gov/genomes/all/GCA/011/801/435/GCA_011801435.1_ASM1180143v1
Cluster 1	GCA_012102335.1	Bacteria;Pseudomonadota;Gammaproteobacteria;Enterobacterales;Enterobacteriaceae;Enterobacter;Enterobacter asburiae	Enterobacter asburiae	133151	99.97	0.33	Animal	Scaffold	ftp://ftp.ncbi.nlm.nih.gov/genomes/all/GCA/012/102/335/GCA_012102335.1_ASM1210233v1
Cluster 1	GCA_012102405.1	Bacteria;Pseudomonadota;Gammaproteobacteria;Enterobacterales;Enterobacteriaceae;Citrobacter;Citrobacter freundii	Citrobacter freundii	525854	96.16	2.56	Animal	Scaffold	ftp://ftp.ncbi.nlm.nih.gov/genomes/all/GCA/012/102/405/GCA_012102405.1_ASM1210240v1
Cluster 1	GCA_012102435.1	Bacteria;Pseudomonadota;Gammaproteobacteria;Aeromonadales;Aeromonadaceae;Aeromonas;Aeromonas caviae	Aeromonas caviae	410820	97.96	0.9	Animal	Scaffold	ftp://ftp.ncbi.nlm.nih.gov/genomes/all/GCA/012/102/435/GCA_012102435.1_ASM1210243v1
Cluster 1	GCA_012221365.1	Bacteria;Pseudomonadota;Gammaproteobacteria;Enterobacterales;Enterobacteriaceae;Escherichia;Escherichia coli	Escherichia coli	4901398	95.48	0.15	Human	Completed Genome	ftp://ftp.ncbi.nlm.nih.gov/genomes/all/GCA/012/221/365/GCA_012221365.1_ASM1222136v1
Cluster 1	GCA_012221565.1	Bacteria;Pseudomonadota;Gammaproteobacteria;Enterobacterales;Enterobacteriaceae;Escherichia;Escherichia coli	Escherichia coli	4899869	95.48	0.15	Human	Completed Genome	ftp://ftp.ncbi.nlm.nih.gov/genomes/all/GCA/012/221/565/GCA_012221565.1_ASM1222156v1
Cluster 1	GCA_012273295.1	Bacteria;Pseudomonadota;Gammaproteobacteria;Enterobacterales;Enterobacteriaceae;Plesiomonas;Plesiomonas shigelloides	Plesiomonas shigelloides	3827431	100	0	Human	Chromosome	ftp://ftp.ncbi.nlm.nih.gov/genomes/all/GCA/012/273/295/GCA_012273295.1_ASM1227329v1
Cluster 1	GCA_012275045.1	Bacteria;Pseudomonadota;Gammaproteobacteria;Vibrionales;Vibrionaceae;Vibrio;Vibrio vulnificus	Vibrio vulnificus	3307558	97.02	2.35	Environment	Chromosome	ftp://ftp.ncbi.nlm.nih.gov/genomes/all/GCA/012/275/045/GCA_012275045.1_ASM1227504v1
Cluster 1	GCA_013073445.1	Bacteria;Pseudomonadota;Gammaproteobacteria;Enterobacterales;Enterobacteriaceae;Escherichia;Escherichia coli	Escherichia coli	423443	98.24	1.12	Animal	Scaffold	ftp://ftp.ncbi.nlm.nih.gov/genomes/all/GCA/013/073/445/GCA_013073445.1_ASM1307344v1
Cluster 1	GCA_013073925.1	Bacteria;Pseudomonadota;Gammaproteobacteria;Enterobacterales;Enterobacteriaceae;Escherichia;Escherichia coli	Escherichia coli	154127	98.35	0.8	Human	Scaffold	ftp://ftp.ncbi.nlm.nih.gov/genomes/all/GCA/013/073/925/GCA_013073925.1_ASM1307392v1
Cluster 1	GCA_013085485.1	Bacteria;Pseudomonadota;Gammaproteobacteria;Aeromonadales;Aeromonadaceae;Aeromonas;Aeromonas media	Aeromonas media	4917765	98.82	1.7	Environment	Completed Genome	ftp://ftp.ncbi.nlm.nih.gov/genomes/all/GCA/013/085/485/GCA_013085485.1_ASM1308548v1
Cluster 1	GCA_013085725.1	Bacteria;Pseudomonadota;Gammaproteobacteria;Aeromonadales;Aeromonadaceae;Aeromonas;Aeromonas media	Aeromonas media	4743402	96.21	0.62	Environment	Completed Genome	ftp://ftp.ncbi.nlm.nih.gov/genomes/all/GCA/013/085/725/GCA_013085725.1_ASM1308572v1
Cluster 1	GCA_013085745.1	Bacteria;Pseudomonadota;Gammaproteobacteria;Aeromonadales;Aeromonadaceae;Aeromonas;Aeromonas media	Aeromonas media	4791767	99.28	0.79	Environment	Completed Genome	ftp://ftp.ncbi.nlm.nih.gov/genomes/all/GCA/013/085/745/GCA_013085745.1_ASM1308574v1
Cluster 1	GCA_013085885.1	Bacteria;Pseudomonadota;Gammaproteobacteria;Enterobacterales;Enterobacteriaceae;Citrobacter;Citrobacter freundii	Citrobacter freundii	4827866	97.67	3.96	Human	Completed Genome	ftp://ftp.ncbi.nlm.nih.gov/genomes/all/GCA/013/085/885/GCA_013085885.1_ASM1308588v1
Cluster 1	GCA_013110925.1	Bacteria;Pseudomonadota;Gammaproteobacteria;Vibrionales;Vibrionaceae;Vibrio;Vibrio cholerae	Vibrio cholerae	88167	99.95	0.71	Environment	Scaffold	ftp://ftp.ncbi.nlm.nih.gov/genomes/all/GCA/013/110/925/GCA_013110925.1_ASM1311092v1
Cluster 1	GCA_013110955.1	Bacteria;Pseudomonadota;Gammaproteobacteria;Vibrionales;Vibrionaceae;Vibrio;Vibrio cholerae	Vibrio cholerae	85353	99.91	0.03	Environment	Scaffold	ftp://ftp.ncbi.nlm.nih.gov/genomes/all/GCA/013/110/955/GCA_013110955.1_ASM1311095v1
Cluster 1	GCA_013110975.1	Bacteria;Pseudomonadota;Gammaproteobacteria;Vibrionales;Vibrionaceae;Vibrio;Vibrio cholerae	Vibrio cholerae	92387	99.96	0.3	Environment	Scaffold	ftp://ftp.ncbi.nlm.nih.gov/genomes/all/GCA/013/110/975/GCA_013110975.1_ASM1311097v1
Cluster 1	GCA_013111105.1	Bacteria;Pseudomonadota;Gammaproteobacteria;Vibrionales;Vibrionaceae;Vibrio;Vibrio cholerae	Vibrio cholerae	78318	99.98	0.15	Environment	Scaffold	ftp://ftp.ncbi.nlm.nih.gov/genomes/all/GCA/013/111/105/GCA_013111105.1_ASM1311110v1
Cluster 1	GCA_013111175.1	Bacteria;Pseudomonadota;Gammaproteobacteria;Vibrionales;Vibrionaceae;Vibrio;Vibrio cholerae	Vibrio cholerae	122517	99.98	0.12	Environment	Scaffold	ftp://ftp.ncbi.nlm.nih.gov/genomes/all/GCA/013/111/175/GCA_013111175.1_ASM1311117v1
Cluster 1	GCA_013111195.1	Bacteria;Pseudomonadota;Gammaproteobacteria;Vibrionales;Vibrionaceae;Vibrio;Vibrio cholerae	Vibrio cholerae	165276	99.98	0.08	Environment	Scaffold	ftp://ftp.ncbi.nlm.nih.gov/genomes/all/GCA/013/111/195/GCA_013111195.1_ASM1311119v1
Cluster 1	GCA_013111215.1	Bacteria;Pseudomonadota;Gammaproteobacteria;Vibrionales;Vibrionaceae;Vibrio;Vibrio cholerae	Vibrio cholerae	102251	99.98	0.05	Environment	Scaffold	ftp://ftp.ncbi.nlm.nih.gov/genomes/all/GCA/013/111/215/GCA_013111215.1_ASM1311121v1
Cluster 1	GCA_013111295.1	Bacteria;Pseudomonadota;Gammaproteobacteria;Vibrionales;Vibrionaceae;Vibrio;Vibrio cholerae	Vibrio cholerae	128412	99.98	0.07	Environment	Scaffold	ftp://ftp.ncbi.nlm.nih.gov/genomes/all/GCA/013/111/295/GCA_013111295.1_ASM1311129v1
Cluster 1	GCA_013111315.1	Bacteria;Pseudomonadota;Gammaproteobacteria;Vibrionales;Vibrionaceae;Vibrio;Vibrio cholerae	Vibrio cholerae	248140	99.98	0.17	Environment	Scaffold	ftp://ftp.ncbi.nlm.nih.gov/genomes/all/GCA/013/111/315/GCA_013111315.1_ASM1311131v1
Cluster 1	GCA_013111535.1	Bacteria;Pseudomonadota;Gammaproteobacteria;Vibrionales;Vibrionaceae;Vibrio;Vibrio cholerae	Vibrio cholerae	197653	99.98	0.32	Environment	Scaffold	ftp://ftp.ncbi.nlm.nih.gov/genomes/all/GCA/013/111/535/GCA_013111535.1_ASM1311153v1
Cluster 1	GCA_013112335.1	Bacteria;Pseudomonadota;Gammaproteobacteria;Enterobacterales;Enterobacteriaceae;Escherichia;Escherichia coli	Escherichia coli	4706754	99.59	0.15	Animal	Completed Genome	ftp://ftp.ncbi.nlm.nih.gov/genomes/all/GCA/013/112/335/GCA_013112335.1_ASM1311233v1
Cluster 1	GCA_013112395.1	Bacteria;Pseudomonadota;Gammaproteobacteria;Enterobacterales;Yersiniaceae;Serratia;Serratia marcescens	Serratia marcescens	5407775	97.88	4.48	Environment	Completed Genome	ftp://ftp.ncbi.nlm.nih.gov/genomes/all/GCA/013/112/395/GCA_013112395.1_ASM1311239v1
Cluster 1	GCA_013122155.1	Bacteria;Pseudomonadota;Gammaproteobacteria;Enterobacterales;Yersiniaceae;Serratia;Serratia marcescens	Serratia marcescens	5074453	97.61	3.35	Animal	Completed Genome	ftp://ftp.ncbi.nlm.nih.gov/genomes/all/GCA/013/122/155/GCA_013122155.1_ASM1312215v1
Cluster 1	GCA_013122565.1	Bacteria;Pseudomonadota;Gammaproteobacteria;Enterobacterales;Enterobacteriaceae;Escherichia;Escherichia coli	Escherichia coli	4821968	98.88	0.95	Animal	Completed Genome	ftp://ftp.ncbi.nlm.nih.gov/genomes/all/GCA/013/122/565/GCA_013122565.1_ASM1312256v1
Cluster 1	GCA_013205705.1	Bacteria;Pseudomonadota;Gammaproteobacteria;Aeromonadales;Aeromonadaceae;Aeromonas;Aeromonas hydrophila	Aeromonas hydrophila	4775230	99.97	0	Animal	Completed Genome	ftp://ftp.ncbi.nlm.nih.gov/genomes/all/GCA/013/205/705/GCA_013205705.1_ASM1320570v1
Cluster 1	GCA_013357665.1	Bacteria;Pseudomonadota;Gammaproteobacteria;Vibrionales;Vibrionaceae;Vibrio;Vibrio cholerae	Vibrio cholerae	2947270	99.98	0.17	Environment	Completed Genome	ftp://ftp.ncbi.nlm.nih.gov/genomes/all/GCA/013/357/665/GCA_013357665.1_ASM1335766v1
Cluster 1	GCA_013357685.1	Bacteria;Pseudomonadota;Gammaproteobacteria;Vibrionales;Vibrionaceae;Vibrio;Vibrio cholerae	Vibrio cholerae	2829740	99.98	0.16	Environment	Completed Genome	ftp://ftp.ncbi.nlm.nih.gov/genomes/all/GCA/013/357/685/GCA_013357685.1_ASM1335768v1
Cluster 1	GCA_013357725.1	Bacteria;Pseudomonadota;Gammaproteobacteria;Vibrionales;Vibrionaceae;Vibrio;Vibrio cholerae	Vibrio cholerae	2900064	99.96	0.16	Environment	Completed Genome	ftp://ftp.ncbi.nlm.nih.gov/genomes/all/GCA/013/357/725/GCA_013357725.1_ASM1335772v1
Cluster 1	GCA_013357745.1	Bacteria;Pseudomonadota;Gammaproteobacteria;Vibrionales;Vibrionaceae;Vibrio;Vibrio cholerae	Vibrio cholerae	2947818	99.98	0.14	Environment	Completed Genome	ftp://ftp.ncbi.nlm.nih.gov/genomes/all/GCA/013/357/745/GCA_013357745.1_ASM1335774v1
Cluster 1	GCA_013357765.1	Bacteria;Pseudomonadota;Gammaproteobacteria;Vibrionales;Vibrionaceae;Vibrio;Vibrio cholerae	Vibrio cholerae	2868038	99.84	0.23	Environment	Completed Genome	ftp://ftp.ncbi.nlm.nih.gov/genomes/all/GCA/013/357/765/GCA_013357765.1_ASM1335776v1
Cluster 1	GCA_013357805.1	Bacteria;Pseudomonadota;Gammaproteobacteria;Vibrionales;Vibrionaceae;Vibrio;Vibrio cholerae	Vibrio cholerae	2967793	99.89	0.71	Environment	Completed Genome	ftp://ftp.ncbi.nlm.nih.gov/genomes/all/GCA/013/357/805/GCA_013357805.1_ASM1335780v1
Cluster 1	GCA_013357825.1	Bacteria;Pseudomonadota;Gammaproteobacteria;Vibrionales;Vibrionaceae;Vibrio;Vibrio cholerae	Vibrio cholerae	3000460	99.96	0.27	Environment	Completed Genome	ftp://ftp.ncbi.nlm.nih.gov/genomes/all/GCA/013/357/825/GCA_013357825.1_ASM1335782v1
Cluster 1	GCA_013357885.1	Bacteria;Pseudomonadota;Gammaproteobacteria;Vibrionales;Vibrionaceae;Vibrio;Vibrio cholerae	Vibrio cholerae	3020084	99.89	0.05	Environment	Completed Genome	ftp://ftp.ncbi.nlm.nih.gov/genomes/all/GCA/013/357/885/GCA_013357885.1_ASM1335788v1
Cluster 1	GCA_013374815.1	Bacteria;Pseudomonadota;Gammaproteobacteria;Enterobacterales;Enterobacteriaceae;Shigella;Shigella sonnei	Shigella sonnei	4762774	99.61	0.64	Environment	Completed Genome	ftp://ftp.ncbi.nlm.nih.gov/genomes/all/GCA/013/374/815/GCA_013374815.1_ASM1337481v1
Cluster 1	GCA_013389415.1	Bacteria;Pseudomonadota;Gammaproteobacteria;Enterobacterales;Enterobacteriaceae;Enterobacter;Enterobacter roggenkampii	Enterobacter roggenkampii	4698609	99.51	0.41	Enironment	Completed Genome	ftp://ftp.ncbi.nlm.nih.gov/genomes/all/GCA/013/389/415/GCA_013389415.1_ASM1338941v1
Cluster 1	GCA_013393825.1	Bacteria;Pseudomonadota;Gammaproteobacteria;Enterobacterales;Enterobacteriaceae;Escherichia;Escherichia coli	Escherichia coli	4707864	99.28	0.42	Animal	Completed Genome	ftp://ftp.ncbi.nlm.nih.gov/genomes/all/GCA/013/393/825/GCA_013393825.1_ASM1339382v1
Cluster 1	GCA_013393845.1	Bacteria;Pseudomonadota;Gammaproteobacteria;Vibrionales;Vibrionaceae;Vibrio;Vibrio parahaemolyticus	Vibrio parahaemolyticus	3478693	97.7	1.15	Animal	Completed Genome	ftp://ftp.ncbi.nlm.nih.gov/genomes/all/GCA/013/393/845/GCA_013393845.1_ASM1339384v1
Cluster 1	GCA_013393865.1	Bacteria;Pseudomonadota;Gammaproteobacteria;Vibrionales;Vibrionaceae;Vibrio;Vibrio parahaemolyticus	Vibrio parahaemolyticus	3589443	98.61	1.23	Animal	Completed Genome	ftp://ftp.ncbi.nlm.nih.gov/genomes/all/GCA/013/393/865/GCA_013393865.1_ASM1339386v1
Cluster 1	GCA_013393885.1	Bacteria;Pseudomonadota;Gammaproteobacteria;Vibrionales;Vibrionaceae;Vibrio;Vibrio parahaemolyticus	Vibrio parahaemolyticus	3325904	98.34	0.8	Animal	Completed Genome	ftp://ftp.ncbi.nlm.nih.gov/genomes/all/GCA/013/393/885/GCA_013393885.1_ASM1339388v1
Cluster 1	GCA_013415825.1	Bacteria;Pseudomonadota;Gammaproteobacteria;Aeromonadales;Aeromonadaceae;Aeromonas;Aeromonas veronii	Aeromonas veronii	4834659	99.07	2.51	Animal	Completed Genome	ftp://ftp.ncbi.nlm.nih.gov/genomes/all/GCA/013/415/825/GCA_013415825.1_ASM1341582v1
Cluster 1	GCA_013424285.1	Bacteria;Pseudomonadota;Gammaproteobacteria;Enterobacterales;Enterobacteriaceae;Escherichia;Escherichia coli	Escherichia coli	237371	98.3	0.25	Animal	Scaffold	ftp://ftp.ncbi.nlm.nih.gov/genomes/all/GCA/013/424/285/GCA_013424285.1_ASM1342428v1
Cluster 1	GCA_013424765.1	Bacteria;Pseudomonadota;Gammaproteobacteria;Enterobacterales;Enterobacteriaceae;Escherichia;Escherichia coli	Escherichia coli	93030	97.5	0.4	Animal	Scaffold	ftp://ftp.ncbi.nlm.nih.gov/genomes/all/GCA/013/424/765/GCA_013424765.1_ASM1342476v1
Cluster 1	GCA_013426155.1	Bacteria;Pseudomonadota;Gammaproteobacteria;Enterobacterales;Yersiniaceae;Serratia;Serratia marcescens	Serratia marcescens	5352713	97.36	4.8	Human	Completed Genome	ftp://ftp.ncbi.nlm.nih.gov/genomes/all/GCA/013/426/155/GCA_013426155.1_ASM1342615v1
Cluster 1	GCA_013487985.1	Bacteria;Pseudomonadota;Gammaproteobacteria;Aeromonadales;Aeromonadaceae;Aeromonas;Aeromonas caviae	Aeromonas caviae	4527876	99.89	1.32	Human	Completed Genome	ftp://ftp.ncbi.nlm.nih.gov/genomes/all/GCA/013/487/985/GCA_013487985.1_ASM1348798v1
Cluster 1	GCA_013488005.1	Bacteria;Pseudomonadota;Gammaproteobacteria;Aeromonadales;Aeromonadaceae;Aeromonas;Aeromonas caviae	Aeromonas caviae	4861894	99.35	1.07	Human	Completed Genome	ftp://ftp.ncbi.nlm.nih.gov/genomes/all/GCA/013/488/005/GCA_013488005.1_ASM1348800v1
Cluster 1	GCA_013635755.1	Bacteria;Pseudomonadota;Gammaproteobacteria;Enterobacterales;Enterobacteriaceae;Enterobacter;Enterobacter roggenkampii	Enterobacter roggenkampii	4485767	98.18	0.68	Environment	Completed Genome	ftp://ftp.ncbi.nlm.nih.gov/genomes/all/GCA/013/635/755/GCA_013635755.1_ASM1363575v1
Cluster 1	GCA_013724765.1	Bacteria;Pseudomonadota;Gammaproteobacteria;Enterobacterales;Enterobacteriaceae;Citrobacter;Citrobacter freundii	Citrobacter freundii	5167828	95.5	4.73	Environment	Completed Genome	ftp://ftp.ncbi.nlm.nih.gov/genomes/all/GCA/013/724/765/GCA_013724765.1_ASM1372476v1
Cluster 1	GCA_013725165.1	Bacteria;Pseudomonadota;Gammaproteobacteria;Enterobacterales;Enterobacteriaceae;Citrobacter;Citrobacter freundii	Citrobacter freundii	5297052	99.82	2.73	Environment	Completed Genome	ftp://ftp.ncbi.nlm.nih.gov/genomes/all/GCA/013/725/165/GCA_013725165.1_ASM1372516v1
Cluster 1	GCA_013729995.1	Bacteria;Pseudomonadota;Gammaproteobacteria;Enterobacterales;Enterobacteriaceae;Citrobacter;Citrobacter freundii	Citrobacter freundii	4920836	97.24	3.66	Environment	Completed Genome	ftp://ftp.ncbi.nlm.nih.gov/genomes/all/GCA/013/729/995/GCA_013729995.1_ASM1372999v1
Cluster 1	GCA_013742615.1	Bacteria;Pseudomonadota;Gammaproteobacteria;Enterobacterales;Enterobacteriaceae;Enterobacter;Enterobacter roggenkampii	Enterobacter roggenkampii	5094430	99.59	0.35	Environment	Completed Genome	ftp://ftp.ncbi.nlm.nih.gov/genomes/all/GCA/013/742/615/GCA_013742615.1_ASM1374261v1
Cluster 1	GCA_013748855.1	Bacteria;Pseudomonadota;Gammaproteobacteria;Enterobacterales;Enterobacteriaceae;Citrobacter;Citrobacter freundii	Citrobacter freundii	5205079	96.9	2.76	Environment	Completed Genome	ftp://ftp.ncbi.nlm.nih.gov/genomes/all/GCA/013/748/855/GCA_013748855.1_ASM1374885v1
Cluster 1	GCA_013781965.1	Bacteria;Pseudomonadota;Gammaproteobacteria;Enterobacterales;Enterobacteriaceae;Citrobacter;Citrobacter freundii	Citrobacter freundii	4992760	99.9	1.4	Environment	Completed Genome	ftp://ftp.ncbi.nlm.nih.gov/genomes/all/GCA/013/781/965/GCA_013781965.1_ASM1378196v1
Cluster 1	GCA_013782845.1	Bacteria;Pseudomonadota;Gammaproteobacteria;Enterobacterales;Enterobacteriaceae;Citrobacter;Citrobacter freundii	Citrobacter freundii	4829251	100	2.74	Environment	Completed Genome	ftp://ftp.ncbi.nlm.nih.gov/genomes/all/GCA/013/782/845/GCA_013782845.1_ASM1378284v1
Cluster 1	GCA_013784425.1	Bacteria;Pseudomonadota;Gammaproteobacteria;Enterobacterales;Enterobacteriaceae;Enterobacter;Enterobacter asburiae	Enterobacter asburiae	4626378	99.07	0.4	Environment	Completed Genome	ftp://ftp.ncbi.nlm.nih.gov/genomes/all/GCA/013/784/425/GCA_013784425.1_ASM1378442v1
Cluster 1	GCA_013786185.1	Bacteria;Pseudomonadota;Gammaproteobacteria;Enterobacterales;Enterobacteriaceae;Escherichia;Escherichia coli	Escherichia coli	5000558	99.26	0.04	Environment	Completed Genome	ftp://ftp.ncbi.nlm.nih.gov/genomes/all/GCA/013/786/185/GCA_013786185.1_ASM1378618v1
Cluster 1	GCA_013786785.1	Bacteria;Pseudomonadota;Gammaproteobacteria;Enterobacterales;Enterobacteriaceae;Escherichia;Escherichia coli	Escherichia coli	4763430	99.97	0.07	Environment	Completed Genome	ftp://ftp.ncbi.nlm.nih.gov/genomes/all/GCA/013/786/785/GCA_013786785.1_ASM1378678v1
Cluster 1	GCA_013791065.1	Bacteria;Pseudomonadota;Gammaproteobacteria;Enterobacterales;Enterobacteriaceae;Citrobacter;Citrobacter freundii	Citrobacter freundii	5136614	99.9	0.43	Environment	Completed Genome	ftp://ftp.ncbi.nlm.nih.gov/genomes/all/GCA/013/791/065/GCA_013791065.1_ASM1379106v1
Cluster 1	GCA_013791615.1	Bacteria;Pseudomonadota;Gammaproteobacteria;Enterobacterales;Enterobacteriaceae;Citrobacter;Citrobacter freundii	Citrobacter freundii	4906122	95.11	2.79	Environment	Completed Genome	ftp://ftp.ncbi.nlm.nih.gov/genomes/all/GCA/013/791/615/GCA_013791615.1_ASM1379161v1
Cluster 1	GCA_013791985.1	Bacteria;Pseudomonadota;Gammaproteobacteria;Enterobacterales;Enterobacteriaceae;Escherichia;Escherichia coli	Escherichia coli	4558474	99.93	0.41	Environment	Completed Genome	ftp://ftp.ncbi.nlm.nih.gov/genomes/all/GCA/013/791/985/GCA_013791985.1_ASM1379198v1
Cluster 1	GCA_014107515.1	Bacteria;Pseudomonadota;Gammaproteobacteria;Vibrionales;Vibrionaceae;Vibrio;Vibrio vulnificus	Vibrio vulnificus	3400045	98.75	1.28	Human	Completed Genome	ftp://ftp.ncbi.nlm.nih.gov/genomes/all/GCA/014/107/515/GCA_014107515.1_ASM1410751v1
Cluster 1	GCA_014117345.2	Bacteria;Pseudomonadota;Gammaproteobacteria;Enterobacterales;Enterobacteriaceae;Escherichia;Escherichia coli	Escherichia coli	4944462	98.81	0.18	Human	Completed Genome	ftp://ftp.ncbi.nlm.nih.gov/genomes/all/GCA/014/117/345/GCA_014117345.2_ASM1411734v2
Cluster 1	GCA_014142825.1	Bacteria;Pseudomonadota;Gammaproteobacteria;Enterobacterales;Enterobacteriaceae;Escherichia;Escherichia coli	Escherichia coli	455599	99.97	0.31	Human	Scaffold	ftp://ftp.ncbi.nlm.nih.gov/genomes/all/GCA/014/142/825/GCA_014142825.1_ASM1414282v1
Cluster 1	GCA_014217505.1	Bacteria;Pseudomonadota;Gammaproteobacteria;Aeromonadales;Aeromonadaceae;Aeromonas;Aeromonas jandaei	Aeromonas jandaei	4575997	99.51	0.58	Animal	Completed Genome	ftp://ftp.ncbi.nlm.nih.gov/genomes/all/GCA/014/217/505/GCA_014217505.1_ASM1421750v1
Cluster 1	GCA_014218795.1	Bacteria;Pseudomonadota;Gammaproteobacteria;Enterobacterales;Enterobacteriaceae;Citrobacter;Citrobacter freundii	Citrobacter freundii	716021	95.41	2.86	Human	Scaffold	ftp://ftp.ncbi.nlm.nih.gov/genomes/all/GCA/014/218/795/GCA_014218795.1_ASM1421879v1
Cluster 1	GCA_014219555.1	Bacteria;Pseudomonadota;Gammaproteobacteria;Enterobacterales;Enterobacteriaceae;Escherichia;Escherichia coli	Escherichia coli	80363	96.33	1.11	Human	Scaffold	ftp://ftp.ncbi.nlm.nih.gov/genomes/all/GCA/014/219/555/GCA_014219555.1_ASM1421955v1
Cluster 1	GCA_014235615.1	Bacteria;Pseudomonadota;Gammaproteobacteria;Enterobacterales;Enterobacteriaceae;Enterobacter;Enterobacter ludwigii	Enterobacter ludwigii	542092	96.06	0.35	Human	Scaffold	ftp://ftp.ncbi.nlm.nih.gov/genomes/all/GCA/014/235/615/GCA_014235615.1_ASM1423561v1
Cluster 1	GCA_014333355.1	Bacteria;Pseudomonadota;Gammaproteobacteria;Enterobacterales;Enterobacteriaceae;Klebsiella;Klebsiella aerogenes	Klebsiella aerogenes	349027	96.15	0.66	Human	Chromosome	ftp://ftp.ncbi.nlm.nih.gov/genomes/all/GCA/014/333/355/GCA_014333355.1_ASM1433335v1
Cluster 1	GCA_014337275.1	Bacteria;Pseudomonadota;Gammaproteobacteria;Enterobacterales;Enterobacteriaceae;Citrobacter;Citrobacter freundii	Citrobacter freundii	5128721	99.87	1.48	Human	Completed Genome	ftp://ftp.ncbi.nlm.nih.gov/genomes/all/GCA/014/337/275/GCA_014337275.1_ASM1433727v1
Cluster 1	GCA_014353815.1	Bacteria;Pseudomonadota;Gammaproteobacteria;Enterobacterales;Erwiniaceae;Pantoea;Pantoea agglomerans	Pantoea agglomerans	318668	100	0.51	Enironment	Scaffold	ftp://ftp.ncbi.nlm.nih.gov/genomes/all/GCA/014/353/815/GCA_014353815.1_ASM1435381v1
Cluster 1	GCA_014354055.1	Bacteria;Pseudomonadota;Gammaproteobacteria;Enterobacterales;Erwiniaceae;Pantoea;Pantoea agglomerans	Pantoea agglomerans	252448	100	0.53	Enironment	Scaffold	ftp://ftp.ncbi.nlm.nih.gov/genomes/all/GCA/014/354/055/GCA_014354055.1_ASM1435405v1
Cluster 1	GCA_014354065.1	Bacteria;Pseudomonadota;Gammaproteobacteria;Enterobacterales;Erwiniaceae;Pantoea;Pantoea agglomerans	Pantoea agglomerans	179585	100	0.46	Enironment	Scaffold	ftp://ftp.ncbi.nlm.nih.gov/genomes/all/GCA/014/354/065/GCA_014354065.1_ASM1435406v1
Cluster 1	GCA_014396885.1	Bacteria;Pseudomonadota;Gammaproteobacteria;Vibrionales;Vibrionaceae;Vibrio;Vibrio parahaemolyticus	Vibrio parahaemolyticus	475510	96.44	0.68	Environment	Scaffold	ftp://ftp.ncbi.nlm.nih.gov/genomes/all/GCA/014/396/885/GCA_014396885.1_ASM1439688v1
Cluster 1	GCA_014396905.1	Bacteria;Pseudomonadota;Gammaproteobacteria;Vibrionales;Vibrionaceae;Vibrio;Vibrio parahaemolyticus	Vibrio parahaemolyticus	491388	96.11	0.99	Environment	Scaffold	ftp://ftp.ncbi.nlm.nih.gov/genomes/all/GCA/014/396/905/GCA_014396905.1_ASM1439690v1
Cluster 1	GCA_014490825.1	Bacteria;Pseudomonadota;Gammaproteobacteria;Enterobacterales;Enterobacteriaceae;Enterobacter;Enterobacter roggenkampii	Enterobacter roggenkampii	4815629	99.56	0.35	Environment	Completed Genome	ftp://ftp.ncbi.nlm.nih.gov/genomes/all/GCA/014/490/825/GCA_014490825.1_ASM1449082v1
Cluster 1	GCA_014495865.1	Bacteria;Pseudomonadota;Gammaproteobacteria;Enterobacterales;Yersiniaceae;Serratia;Serratia liquefaciens	Serratia liquefaciens	5395544	99.89	1.05	Environment	Completed Genome	ftp://ftp.ncbi.nlm.nih.gov/genomes/all/GCA/014/495/865/GCA_014495865.1_ASM1449586v1
Cluster 1	GCA_014654545.1	Bacteria;Pseudomonadota;Gammaproteobacteria;Vibrionales;Vibrionaceae;Vibrio;Vibrio cholerae	Vibrio cholerae	170440	99.58	0.07	Human	Scaffold	ftp://ftp.ncbi.nlm.nih.gov/genomes/all/GCA/014/654/545/GCA_014654545.1_ASM1465454v1
Cluster 1	GCA_014841465.1	Bacteria;Pseudomonadota;Gammaproteobacteria;Enterobacterales;Erwiniaceae;Pantoea;Pantoea agglomerans	Pantoea agglomerans	307161	95.01	0.97	Enironment	Scaffold	ftp://ftp.ncbi.nlm.nih.gov/genomes/all/GCA/014/841/465/GCA_014841465.1_ASM1484146v1
Cluster 1	GCA_014854595.1	Bacteria;Pseudomonadota;Gammaproteobacteria;Enterobacterales;Enterobacteriaceae;Plesiomonas;Plesiomonas shigelloides	Plesiomonas shigelloides	3490523	100	0.41	Animal	Completed Genome	ftp://ftp.ncbi.nlm.nih.gov/genomes/all/GCA/014/854/595/GCA_014854595.1_ASM1485459v1
Cluster 1	GCA_014894845.1	Bacteria;Pseudomonadota;Gammaproteobacteria;Enterobacterales;Enterobacteriaceae;Klebsiella;Klebsiella pneumoniae	Klebsiella pneumoniae	350109	99.7	1.25	Human	Scaffold	ftp://ftp.ncbi.nlm.nih.gov/genomes/all/GCA/014/894/845/GCA_014894845.1_ASM1489484v1
Cluster 1	GCA_014901505.1	Bacteria;Pseudomonadota;Gammaproteobacteria;Enterobacterales;Enterobacteriaceae;Enterobacter;Enterobacter hormaechei	Enterobacter hormaechei	347333	99.57	0.04	Human	Scaffold	ftp://ftp.ncbi.nlm.nih.gov/genomes/all/GCA/014/901/505/GCA_014901505.1_ASM1490150v1
Cluster 1	GCA_014901875.1	Bacteria;Pseudomonadota;Gammaproteobacteria;Enterobacterales;Enterobacteriaceae;Citrobacter;Citrobacter freundii	Citrobacter freundii	405465	99.93	1.86	Human	Scaffold	ftp://ftp.ncbi.nlm.nih.gov/genomes/all/GCA/014/901/875/GCA_014901875.1_ASM1490187v1
Cluster 1	GCA_014902055.1	Bacteria;Pseudomonadota;Gammaproteobacteria;Enterobacterales;Enterobacteriaceae;Citrobacter;Citrobacter freundii	Citrobacter freundii	840332	95.03	3.01	Human	Scaffold	ftp://ftp.ncbi.nlm.nih.gov/genomes/all/GCA/014/902/055/GCA_014902055.1_ASM1490205v1
Cluster 1	GCA_014902275.1	Bacteria;Pseudomonadota;Gammaproteobacteria;Enterobacterales;Enterobacteriaceae;Enterobacter;Enterobacter hormaechei	Enterobacter hormaechei	503566	99.92	0.14	Human	Scaffold	ftp://ftp.ncbi.nlm.nih.gov/genomes/all/GCA/014/902/275/GCA_014902275.1_ASM1490227v1
Cluster 1	GCA_014902595.1	Bacteria;Pseudomonadota;Gammaproteobacteria;Enterobacterales;Enterobacteriaceae;Enterobacter;Enterobacter asburiae	Enterobacter asburiae	233885	99.97	1.11	Human	Scaffold	ftp://ftp.ncbi.nlm.nih.gov/genomes/all/GCA/014/902/595/GCA_014902595.1_ASM1490259v1
Cluster 1	GCA_014902635.1	Bacteria;Pseudomonadota;Gammaproteobacteria;Enterobacterales;Enterobacteriaceae;Enterobacter;Enterobacter roggenkampii	Enterobacter roggenkampii	257245	99.07	0.41	Human	Scaffold	ftp://ftp.ncbi.nlm.nih.gov/genomes/all/GCA/014/902/635/GCA_014902635.1_ASM1490263v1
Cluster 1	GCA_014903295.1	Bacteria;Pseudomonadota;Gammaproteobacteria;Enterobacterales;Enterobacteriaceae;Klebsiella;Klebsiella pneumoniae	Klebsiella pneumoniae	214791	100	0.64	Human	Scaffold	ftp://ftp.ncbi.nlm.nih.gov/genomes/all/GCA/014/903/295/GCA_014903295.1_ASM1490329v1
Cluster 1	GCA_014903525.1	Bacteria;Pseudomonadota;Gammaproteobacteria;Enterobacterales;Enterobacteriaceae;Citrobacter;Citrobacter youngae	Citrobacter youngae	206104	96.39	2.11	Human	Scaffold	ftp://ftp.ncbi.nlm.nih.gov/genomes/all/GCA/014/903/525/GCA_014903525.1_ASM1490352v1
Cluster 1	GCA_014903845.1	Bacteria;Pseudomonadota;Gammaproteobacteria;Enterobacterales;Enterobacteriaceae;Enterobacter;Enterobacter hormaechei	Enterobacter hormaechei	421230	99.47	0.94	Human	Scaffold	ftp://ftp.ncbi.nlm.nih.gov/genomes/all/GCA/014/903/845/GCA_014903845.1_ASM1490384v1
Cluster 1	GCA_014903995.1	Bacteria;Pseudomonadota;Gammaproteobacteria;Enterobacterales;Enterobacteriaceae;Enterobacter;Enterobacter ludwigii	Enterobacter ludwigii	284260	96.21	0.19	Human	Scaffold	ftp://ftp.ncbi.nlm.nih.gov/genomes/all/GCA/014/903/995/GCA_014903995.1_ASM1490399v1
Cluster 1	GCA_014918335.1	Bacteria;Pseudomonadota;Gammaproteobacteria;Vibrionales;Vibrionaceae;Vibrio;Vibrio parahaemolyticus	Vibrio parahaemolyticus	401192	100	0.09	Animal	Scaffold	ftp://ftp.ncbi.nlm.nih.gov/genomes/all/GCA/014/918/335/GCA_014918335.1_ASM1491833v1
Cluster 1	GCA_014918685.1	Bacteria;Pseudomonadota;Gammaproteobacteria;Vibrionales;Vibrionaceae;Vibrio;Vibrio parahaemolyticus	Vibrio parahaemolyticus	350549	100	0.47	Environment	Scaffold	ftp://ftp.ncbi.nlm.nih.gov/genomes/all/GCA/014/918/685/GCA_014918685.1_ASM1491868v1
Cluster 1	GCA_014918815.1	Bacteria;Pseudomonadota;Gammaproteobacteria;Vibrionales;Vibrionaceae;Vibrio;Vibrio parahaemolyticus	Vibrio parahaemolyticus	345154	100	0.63	Animal	Scaffold	ftp://ftp.ncbi.nlm.nih.gov/genomes/all/GCA/014/918/815/GCA_014918815.1_ASM1491881v1
Cluster 1	GCA_014918865.1	Bacteria;Pseudomonadota;Gammaproteobacteria;Vibrionales;Vibrionaceae;Vibrio;Vibrio parahaemolyticus	Vibrio parahaemolyticus	175738	99.5	0.35	Animal	Scaffold	ftp://ftp.ncbi.nlm.nih.gov/genomes/all/GCA/014/918/865/GCA_014918865.1_ASM1491886v1
Cluster 1	GCA_014918905.1	Bacteria;Pseudomonadota;Gammaproteobacteria;Vibrionales;Vibrionaceae;Vibrio;Vibrio parahaemolyticus	Vibrio parahaemolyticus	231379	99.93	0.19	Animal	Scaffold	ftp://ftp.ncbi.nlm.nih.gov/genomes/all/GCA/014/918/905/GCA_014918905.1_ASM1491890v1
Cluster 1	GCA_014918925.1	Bacteria;Pseudomonadota;Gammaproteobacteria;Vibrionales;Vibrionaceae;Vibrio;Vibrio parahaemolyticus	Vibrio parahaemolyticus	497163	100	0.54	Animal	Scaffold	ftp://ftp.ncbi.nlm.nih.gov/genomes/all/GCA/014/918/925/GCA_014918925.1_ASM1491892v1
Cluster 1	GCA_014919015.1	Bacteria;Pseudomonadota;Gammaproteobacteria;Vibrionales;Vibrionaceae;Vibrio;Vibrio parahaemolyticus	Vibrio parahaemolyticus	470620	100	0.1	Animal	Scaffold	ftp://ftp.ncbi.nlm.nih.gov/genomes/all/GCA/014/919/015/GCA_014919015.1_ASM1491901v1
Cluster 1	GCA_014919025.1	Bacteria;Pseudomonadota;Gammaproteobacteria;Vibrionales;Vibrionaceae;Vibrio;Vibrio parahaemolyticus	Vibrio parahaemolyticus	388305	100	0	Animal	Scaffold	ftp://ftp.ncbi.nlm.nih.gov/genomes/all/GCA/014/919/025/GCA_014919025.1_ASM1491902v1
Cluster 1	GCA_014919395.1	Bacteria;Pseudomonadota;Gammaproteobacteria;Vibrionales;Vibrionaceae;Vibrio;Vibrio parahaemolyticus	Vibrio parahaemolyticus	413556	99.86	0.15	Animal	Scaffold	ftp://ftp.ncbi.nlm.nih.gov/genomes/all/GCA/014/919/395/GCA_014919395.1_ASM1491939v1
Cluster 1	GCA_014919415.1	Bacteria;Pseudomonadota;Gammaproteobacteria;Vibrionales;Vibrionaceae;Vibrio;Vibrio parahaemolyticus	Vibrio parahaemolyticus	563217	99.9	0.36	Environment	Scaffold	ftp://ftp.ncbi.nlm.nih.gov/genomes/all/GCA/014/919/415/GCA_014919415.1_ASM1491941v1
Cluster 1	GCA_014919485.1	Bacteria;Pseudomonadota;Gammaproteobacteria;Vibrionales;Vibrionaceae;Vibrio;Vibrio parahaemolyticus	Vibrio parahaemolyticus	504646	99.93	0.43	Environment	Scaffold	ftp://ftp.ncbi.nlm.nih.gov/genomes/all/GCA/014/919/485/GCA_014919485.1_ASM1491948v1
Cluster 1	GCA_014919655.1	Bacteria;Pseudomonadota;Gammaproteobacteria;Vibrionales;Vibrionaceae;Vibrio;Vibrio parahaemolyticus	Vibrio parahaemolyticus	479416	100	0.32	Animal	Scaffold	ftp://ftp.ncbi.nlm.nih.gov/genomes/all/GCA/014/919/655/GCA_014919655.1_ASM1491965v1
Cluster 1	GCA_014919755.1	Bacteria;Pseudomonadota;Gammaproteobacteria;Vibrionales;Vibrionaceae;Vibrio;Vibrio parahaemolyticus	Vibrio parahaemolyticus	532214	99.93	0	Animal	Scaffold	ftp://ftp.ncbi.nlm.nih.gov/genomes/all/GCA/014/919/755/GCA_014919755.1_ASM1491975v1
Cluster 1	GCA_014919845.1	Bacteria;Pseudomonadota;Gammaproteobacteria;Vibrionales;Vibrionaceae;Vibrio;Vibrio parahaemolyticus	Vibrio parahaemolyticus	403203	100	0.39	Animal	Scaffold	ftp://ftp.ncbi.nlm.nih.gov/genomes/all/GCA/014/919/845/GCA_014919845.1_ASM1491984v1
Cluster 1	GCA_014919865.1	Bacteria;Pseudomonadota;Gammaproteobacteria;Vibrionales;Vibrionaceae;Vibrio;Vibrio parahaemolyticus	Vibrio parahaemolyticus	386384	99.73	0.49	Animal	Scaffold	ftp://ftp.ncbi.nlm.nih.gov/genomes/all/GCA/014/919/865/GCA_014919865.1_ASM1491986v1
Cluster 1	GCA_014920015.1	Bacteria;Pseudomonadota;Gammaproteobacteria;Vibrionales;Vibrionaceae;Vibrio;Vibrio parahaemolyticus	Vibrio parahaemolyticus	403346	99.73	0.05	Animal	Scaffold	ftp://ftp.ncbi.nlm.nih.gov/genomes/all/GCA/014/920/015/GCA_014920015.1_ASM1492001v1
Cluster 1	GCA_014920275.1	Bacteria;Pseudomonadota;Gammaproteobacteria;Vibrionales;Vibrionaceae;Vibrio;Vibrio parahaemolyticus	Vibrio parahaemolyticus	302243	100	0	Animal	Scaffold	ftp://ftp.ncbi.nlm.nih.gov/genomes/all/GCA/014/920/275/GCA_014920275.1_ASM1492027v1
Cluster 1	GCA_014920415.1	Bacteria;Pseudomonadota;Gammaproteobacteria;Vibrionales;Vibrionaceae;Vibrio;Vibrio parahaemolyticus	Vibrio parahaemolyticus	391406	100	0.42	Animal	Scaffold	ftp://ftp.ncbi.nlm.nih.gov/genomes/all/GCA/014/920/415/GCA_014920415.1_ASM1492041v1
Cluster 1	GCA_014920495.1	Bacteria;Pseudomonadota;Gammaproteobacteria;Vibrionales;Vibrionaceae;Vibrio;Vibrio parahaemolyticus	Vibrio parahaemolyticus	317097	100	0.35	Environment	Scaffold	ftp://ftp.ncbi.nlm.nih.gov/genomes/all/GCA/014/920/495/GCA_014920495.1_ASM1492049v1
Cluster 1	GCA_014920505.1	Bacteria;Pseudomonadota;Gammaproteobacteria;Vibrionales;Vibrionaceae;Vibrio;Vibrio parahaemolyticus	Vibrio parahaemolyticus	782398	100	0.05	Animal	Scaffold	ftp://ftp.ncbi.nlm.nih.gov/genomes/all/GCA/014/920/505/GCA_014920505.1_ASM1492050v1
Cluster 1	GCA_014920565.1	Bacteria;Pseudomonadota;Gammaproteobacteria;Vibrionales;Vibrionaceae;Vibrio;Vibrio parahaemolyticus	Vibrio parahaemolyticus	527619	100	0.09	Animal	Scaffold	ftp://ftp.ncbi.nlm.nih.gov/genomes/all/GCA/014/920/565/GCA_014920565.1_ASM1492056v1
Cluster 1	GCA_014920675.1	Bacteria;Pseudomonadota;Gammaproteobacteria;Vibrionales;Vibrionaceae;Vibrio;Vibrio parahaemolyticus	Vibrio parahaemolyticus	402601	99.93	0	Animal	Scaffold	ftp://ftp.ncbi.nlm.nih.gov/genomes/all/GCA/014/920/675/GCA_014920675.1_ASM1492067v1
Cluster 1	GCA_014920695.1	Bacteria;Pseudomonadota;Gammaproteobacteria;Vibrionales;Vibrionaceae;Vibrio;Vibrio parahaemolyticus	Vibrio parahaemolyticus	914242	99.73	0.06	Environment	Scaffold	ftp://ftp.ncbi.nlm.nih.gov/genomes/all/GCA/014/920/695/GCA_014920695.1_ASM1492069v1
Cluster 1	GCA_014920885.1	Bacteria;Pseudomonadota;Gammaproteobacteria;Vibrionales;Vibrionaceae;Vibrio;Vibrio parahaemolyticus	Vibrio parahaemolyticus	317402	99.93	0.18	Animal	Scaffold	ftp://ftp.ncbi.nlm.nih.gov/genomes/all/GCA/014/920/885/GCA_014920885.1_ASM1492088v1
Cluster 1	GCA_014920925.1	Bacteria;Pseudomonadota;Gammaproteobacteria;Vibrionales;Vibrionaceae;Vibrio;Vibrio parahaemolyticus	Vibrio parahaemolyticus	329082	99.73	0.53	Animal	Scaffold	ftp://ftp.ncbi.nlm.nih.gov/genomes/all/GCA/014/920/925/GCA_014920925.1_ASM1492092v1
Cluster 1	GCA_014921335.1	Bacteria;Pseudomonadota;Gammaproteobacteria;Vibrionales;Vibrionaceae;Vibrio;Vibrio parahaemolyticus	Vibrio parahaemolyticus	344128	99.77	0.34	Animal	Scaffold	ftp://ftp.ncbi.nlm.nih.gov/genomes/all/GCA/014/921/335/GCA_014921335.1_ASM1492133v1
Cluster 1	GCA_014921595.1	Bacteria;Pseudomonadota;Gammaproteobacteria;Vibrionales;Vibrionaceae;Vibrio;Vibrio parahaemolyticus	Vibrio parahaemolyticus	253512	99.93	0.1	Animal	Scaffold	ftp://ftp.ncbi.nlm.nih.gov/genomes/all/GCA/014/921/595/GCA_014921595.1_ASM1492159v1
Cluster 1	GCA_014921975.1	Bacteria;Pseudomonadota;Gammaproteobacteria;Vibrionales;Vibrionaceae;Vibrio;Vibrio parahaemolyticus	Vibrio parahaemolyticus	202434	99.91	0.03	Animal	Scaffold	ftp://ftp.ncbi.nlm.nih.gov/genomes/all/GCA/014/921/975/GCA_014921975.1_ASM1492197v1
Cluster 1	GCA_014931625.2	Bacteria;Pseudomonadota;Gammaproteobacteria;Enterobacterales;Enterobacteriaceae;Citrobacter;Citrobacter sedlakii	Citrobacter sedlakii	373731	99.28	1.01	Environment	Scaffold	ftp://ftp.ncbi.nlm.nih.gov/genomes/all/GCA/014/931/625/GCA_014931625.2_ASM1493162v2
Cluster 1	GCA_014964045.1	Bacteria;Pseudomonadota;Gammaproteobacteria;Vibrionales;Vibrionaceae;Vibrio;Vibrio parahaemolyticus	Vibrio parahaemolyticus	366653	100	0.13	Environment	Scaffold	ftp://ftp.ncbi.nlm.nih.gov/genomes/all/GCA/014/964/045/GCA_014964045.1_ASM1496404v1
Cluster 1	GCA_014964055.1	Bacteria;Pseudomonadota;Gammaproteobacteria;Vibrionales;Vibrionaceae;Vibrio;Vibrio parahaemolyticus	Vibrio parahaemolyticus	695863	100	0	Animal	Scaffold	ftp://ftp.ncbi.nlm.nih.gov/genomes/all/GCA/014/964/055/GCA_014964055.1_ASM1496405v1
Cluster 1	GCA_014964165.1	Bacteria;Pseudomonadota;Gammaproteobacteria;Vibrionales;Vibrionaceae;Vibrio;Vibrio parahaemolyticus	Vibrio parahaemolyticus	207120	99.8	0.46	Animal	Scaffold	ftp://ftp.ncbi.nlm.nih.gov/genomes/all/GCA/014/964/165/GCA_014964165.1_ASM1496416v1
Cluster 1	GCA_014964185.1	Bacteria;Pseudomonadota;Gammaproteobacteria;Vibrionales;Vibrionaceae;Vibrio;Vibrio parahaemolyticus	Vibrio parahaemolyticus	377416	99.86	0.05	Animal	Scaffold	ftp://ftp.ncbi.nlm.nih.gov/genomes/all/GCA/014/964/185/GCA_014964185.1_ASM1496418v1
Cluster 1	GCA_015168595.1	Bacteria;Pseudomonadota;Gammaproteobacteria;Enterobacterales;Enterobacteriaceae;Enterobacter;Enterobacter asburiae	Enterobacter asburiae	4574166	99.97	0.33	Enironment	Completed Genome	ftp://ftp.ncbi.nlm.nih.gov/genomes/all/GCA/015/168/595/GCA_015168595.1_ASM1516859v1
Cluster 1	GCA_015168795.1	Bacteria;Pseudomonadota;Gammaproteobacteria;Vibrionales;Vibrionaceae;Vibrio;Vibrio cholerae	Vibrio cholerae	3040054	99.96	0.16	Human	Completed Genome	ftp://ftp.ncbi.nlm.nih.gov/genomes/all/GCA/015/168/795/GCA_015168795.1_ASM1516879v1
Cluster 1	GCA_015278695.1	Bacteria;Pseudomonadota;Gammaproteobacteria;Enterobacterales;Enterobacteriaceae;Enterobacter;Enterobacter bugandensis	Enterobacter bugandensis	510439	96.22	0.12	Environment	Scaffold	ftp://ftp.ncbi.nlm.nih.gov/genomes/all/GCA/015/278/695/GCA_015278695.1_ASM1527869v1
Cluster 1	GCA_015318285.1	Bacteria;Pseudomonadota;Gammaproteobacteria;Aeromonadales;Aeromonadaceae;Aeromonas;Aeromonas veronii	Aeromonas veronii	305294	97.34	2.14	Animal	Scaffold	ftp://ftp.ncbi.nlm.nih.gov/genomes/all/GCA/015/318/285/GCA_015318285.1_ASM1531828v1
Cluster 1	GCA_015475595.1	Bacteria;Pseudomonadota;Gammaproteobacteria;Enterobacterales;Enterobacteriaceae;Shigella;Shigella dysenteriae	Shigella dysenteriae	4393662	99.87	0.04	Human	Completed Genome	ftp://ftp.ncbi.nlm.nih.gov/genomes/all/GCA/015/475/595/GCA_015475595.1_ASM1547559v1
Cluster 1	GCA_015546645.1	Bacteria;Pseudomonadota;Gammaproteobacteria;Pasteurellales;Pasteurellaceae;Pasteurella;Pasteurella multocida	Pasteurella multocida	72128	99.2	0	Animal	Scaffold	ftp://ftp.ncbi.nlm.nih.gov/genomes/all/GCA/015/546/645/GCA_015546645.1_ASM1554664v1
Cluster 1	GCA_015546695.1	Bacteria;Pseudomonadota;Gammaproteobacteria;Pasteurellales;Pasteurellaceae;Pasteurella;Pasteurella multocida	Pasteurella multocida	105133	99.55	0.01	Animal	Scaffold	ftp://ftp.ncbi.nlm.nih.gov/genomes/all/GCA/015/546/695/GCA_015546695.1_ASM1554669v1
Cluster 1	GCA_015548865.1	Bacteria;Pseudomonadota;Gammaproteobacteria;Enterobacterales;Yersiniaceae;Serratia;Serratia marcescens	Serratia marcescens	154596	99.65	0.76	Human	Scaffold	ftp://ftp.ncbi.nlm.nih.gov/genomes/all/GCA/015/548/865/GCA_015548865.1_ASM1554886v1
Cluster 1	GCA_015553785.1	Bacteria;Pseudomonadota;Gammaproteobacteria;Enterobacterales;Morganellaceae;Morganella;Morganella morganii	Morganella morganii	153282	100	0	Human	Scaffold	ftp://ftp.ncbi.nlm.nih.gov/genomes/all/GCA/015/553/785/GCA_015553785.1_ASM1555378v1
Cluster 1	GCA_015561005.1	Bacteria;Pseudomonadota;Gammaproteobacteria;Enterobacterales;Enterobacteriaceae;Escherichia;Escherichia coli	Escherichia coli	144908	98.37	0.78	Human	Scaffold	ftp://ftp.ncbi.nlm.nih.gov/genomes/all/GCA/015/561/005/GCA_015561005.1_ASM1556100v1
Cluster 1	GCA_015571595.1	Bacteria;Pseudomonadota;Gammaproteobacteria;Enterobacterales;Enterobacteriaceae;Escherichia;Escherichia coli	Escherichia coli O167:H26	4861285	99.37	0.25	Animal	Completed Genome	ftp://ftp.ncbi.nlm.nih.gov/genomes/all/GCA/015/571/595/GCA_015571595.1_ASM1557159v1
Cluster 1	GCA_015672995.1	Bacteria;Pseudomonadota;Gammaproteobacteria;Enterobacterales;Enterobacteriaceae;Escherichia;Escherichia coli	Escherichia coli	286065	99.97	0.19	Animal	Scaffold	ftp://ftp.ncbi.nlm.nih.gov/genomes/all/GCA/015/672/995/GCA_015672995.1_ASM1567299v1
Cluster 1	GCA_015673325.1	Bacteria;Pseudomonadota;Gammaproteobacteria;Enterobacterales;Enterobacteriaceae;Escherichia;Escherichia coli	Escherichia coli	61260	99.62	0.3	Animal	Scaffold	ftp://ftp.ncbi.nlm.nih.gov/genomes/all/GCA/015/673/325/GCA_015673325.1_ASM1567332v1
Cluster 1	GCA_015674115.1	Bacteria;Pseudomonadota;Gammaproteobacteria;Enterobacterales;Enterobacteriaceae;Escherichia;Escherichia coli	Escherichia coli	162723	99.97	0.04	Animal	Scaffold	ftp://ftp.ncbi.nlm.nih.gov/genomes/all/GCA/015/674/115/GCA_015674115.1_ASM1567411v1
Cluster 1	GCA_015676795.1	Bacteria;Pseudomonadota;Gammaproteobacteria;Enterobacterales;Enterobacteriaceae;Enterobacter;Enterobacter roggenkampii	Enterobacter roggenkampii	195016	98.97	0.65	Animal	Scaffold	ftp://ftp.ncbi.nlm.nih.gov/genomes/all/GCA/015/676/795/GCA_015676795.1_ASM1567679v1
Cluster 1	GCA_015690245.1	Bacteria;Pseudomonadota;Gammaproteobacteria;Enterobacterales;Enterobacteriaceae;Escherichia;Escherichia coli	Escherichia coli	110621	98.22	0.75	Human	Scaffold	ftp://ftp.ncbi.nlm.nih.gov/genomes/all/GCA/015/690/245/GCA_015690245.1_ASM1569024v1
Cluster 1	GCA_015708675.1	Bacteria;Pseudomonadota;Gammaproteobacteria;Enterobacterales;Enterobacteriaceae;Enterobacter;Enterobacter mori	Enterobacter mori	4733305	97.93	2.39	Environment	Completed Genome	ftp://ftp.ncbi.nlm.nih.gov/genomes/all/GCA/015/708/675/GCA_015708675.1_ASM1570867v1
Cluster 1	GCA_015711555.1	Bacteria;Pseudomonadota;Gammaproteobacteria;Enterobacterales;Erwiniaceae;Pantoea;Pantoea agglomerans	Pantoea agglomerans	323081	95.84	0.79	Enironment	Scaffold	ftp://ftp.ncbi.nlm.nih.gov/genomes/all/GCA/015/711/555/GCA_015711555.1_ASM1571155v1
Cluster 1	GCA_015723415.1	Bacteria;Pseudomonadota;Gammaproteobacteria;Enterobacterales;Morganellaceae;Proteus;Proteus mirabilis	Proteus mirabilis	56377	100	0	Human	Scaffold	ftp://ftp.ncbi.nlm.nih.gov/genomes/all/GCA/015/723/415/GCA_015723415.1_ASM1572341v1
Cluster 1	GCA_015723425.1	Bacteria;Pseudomonadota;Gammaproteobacteria;Enterobacterales;Morganellaceae;Proteus;Proteus mirabilis	Proteus mirabilis	225076	100	0	Human	Scaffold	ftp://ftp.ncbi.nlm.nih.gov/genomes/all/GCA/015/723/425/GCA_015723425.1_ASM1572342v1
Cluster 1	GCA_015723525.1	Bacteria;Pseudomonadota;Gammaproteobacteria;Enterobacterales;Morganellaceae;Proteus;Proteus mirabilis	Proteus mirabilis	194262	100	0.54	Human	Scaffold	ftp://ftp.ncbi.nlm.nih.gov/genomes/all/GCA/015/723/525/GCA_015723525.1_ASM1572352v1
Cluster 1	GCA_015723715.1	Bacteria;Pseudomonadota;Gammaproteobacteria;Enterobacterales;Morganellaceae;Proteus;Proteus mirabilis	Proteus mirabilis	277373	100	0	Human	Scaffold	ftp://ftp.ncbi.nlm.nih.gov/genomes/all/GCA/015/723/715/GCA_015723715.1_ASM1572371v1
Cluster 1	GCA_015723825.1	Bacteria;Pseudomonadota;Gammaproteobacteria;Enterobacterales;Morganellaceae;Proteus;Proteus mirabilis	Proteus mirabilis	341633	100	0	Human	Scaffold	ftp://ftp.ncbi.nlm.nih.gov/genomes/all/GCA/015/723/825/GCA_015723825.1_ASM1572382v1
Cluster 1	GCA_015724095.1	Bacteria;Pseudomonadota;Gammaproteobacteria;Enterobacterales;Morganellaceae;Proteus;Proteus mirabilis	Proteus mirabilis	211181	100	0	Human	Scaffold	ftp://ftp.ncbi.nlm.nih.gov/genomes/all/GCA/015/724/095/GCA_015724095.1_ASM1572409v1
Cluster 1	GCA_015779285.1	Bacteria;Pseudomonadota;Gammaproteobacteria;Vibrionales;Vibrionaceae;Vibrio;Vibrio parahaemolyticus	Vibrio parahaemolyticus	3610915	98.64	1.96	Animal	Completed Genome	ftp://ftp.ncbi.nlm.nih.gov/genomes/all/GCA/015/779/285/GCA_015779285.1_ASM1577928v1
Cluster 1	GCA_016006315.1	Bacteria;Pseudomonadota;Gammaproteobacteria;Enterobacterales;Yersiniaceae;Serratia;Serratia marcescens	Serratia marcescens	175489	99.37	0.89	Human	Scaffold	ftp://ftp.ncbi.nlm.nih.gov/genomes/all/GCA/016/006/315/GCA_016006315.1_ASM1600631v1
Cluster 1	GCA_016006545.1	Bacteria;Pseudomonadota;Gammaproteobacteria;Enterobacterales;Yersiniaceae;Serratia;Serratia marcescens	Serratia marcescens	223060	99.86	0	Human	Scaffold	ftp://ftp.ncbi.nlm.nih.gov/genomes/all/GCA/016/006/545/GCA_016006545.1_ASM1600654v1
Cluster 1	GCA_016006655.1	Bacteria;Pseudomonadota;Gammaproteobacteria;Enterobacterales;Yersiniaceae;Serratia;Serratia marcescens	Serratia marcescens	240313	99.94	0	Human	Scaffold	ftp://ftp.ncbi.nlm.nih.gov/genomes/all/GCA/016/006/655/GCA_016006655.1_ASM1600665v1
Cluster 1	GCA_016006695.1	Bacteria;Pseudomonadota;Gammaproteobacteria;Enterobacterales;Yersiniaceae;Serratia;Serratia marcescens	Serratia marcescens	226933	99.81	0	Human	Scaffold	ftp://ftp.ncbi.nlm.nih.gov/genomes/all/GCA/016/006/695/GCA_016006695.1_ASM1600669v1
Cluster 1	GCA_016406305.1	Bacteria;Pseudomonadota;Gammaproteobacteria;Alteromonadales;Shewanellaceae;Shewanella;Shewanella putrefaciens	Shewanella putrefaciens	4575397	99.8	0.15	Human	Completed Genome	ftp://ftp.ncbi.nlm.nih.gov/genomes/all/GCA/016/406/305/GCA_016406305.1_ASM1640630v1
Cluster 1	GCA_016406325.1	Bacteria;Pseudomonadota;Gammaproteobacteria;Alteromonadales;Shewanellaceae;Shewanella;Shewanella putrefaciens	Shewanella putrefaciens	4386330	99.65	0.04	Human	Completed Genome	ftp://ftp.ncbi.nlm.nih.gov/genomes/all/GCA/016/406/325/GCA_016406325.1_ASM1640632v1
Cluster 1	GCA_016411885.1	Bacteria;Pseudomonadota;Gammaproteobacteria;Enterobacterales;Enterobacteriaceae;Enterobacter;Enterobacter asburiae	Enterobacter asburiae	533193	99.07	0.43	Human	Scaffold	ftp://ftp.ncbi.nlm.nih.gov/genomes/all/GCA/016/411/885/GCA_016411885.1_ASM1641188v1
Cluster 1	GCA_016411895.1	Bacteria;Pseudomonadota;Gammaproteobacteria;Enterobacterales;Enterobacteriaceae;Enterobacter;Enterobacter asburiae	Enterobacter asburiae	358857	99.97	1.69	Human	Scaffold	ftp://ftp.ncbi.nlm.nih.gov/genomes/all/GCA/016/411/895/GCA_016411895.1_ASM1641189v1
Cluster 1	GCA_016427815.1	Bacteria;Pseudomonadota;Gammaproteobacteria;Enterobacterales;Enterobacteriaceae;Enterobacter;Enterobacter roggenkampii	Enterobacter roggenkampii	132516	98.75	0.1	Human	Scaffold	ftp://ftp.ncbi.nlm.nih.gov/genomes/all/GCA/016/427/815/GCA_016427815.1_ASM1642781v1
Cluster 1	GCA_016427845.1	Bacteria;Pseudomonadota;Gammaproteobacteria;Enterobacterales;Enterobacteriaceae;Enterobacter;Enterobacter hormaechei	Enterobacter hormaechei	92845	99.97	0.76	Human	Scaffold	ftp://ftp.ncbi.nlm.nih.gov/genomes/all/GCA/016/427/845/GCA_016427845.1_ASM1642784v1
Cluster 1	GCA_016427865.1	Bacteria;Pseudomonadota;Gammaproteobacteria;Enterobacterales;Enterobacteriaceae;Enterobacter;Enterobacter asburiae	Enterobacter asburiae	59016	99.07	0.88	Human	Scaffold	ftp://ftp.ncbi.nlm.nih.gov/genomes/all/GCA/016/427/865/GCA_016427865.1_ASM1642786v1
Cluster 1	GCA_016504515.1	Bacteria;Pseudomonadota;Gammaproteobacteria;Enterobacterales;Enterobacteriaceae;Citrobacter;Citrobacter braakii	Citrobacter braakii	438363	97	3.31	Human	Scaffold	ftp://ftp.ncbi.nlm.nih.gov/genomes/all/GCA/016/504/515/GCA_016504515.1_ASM1650451v1
Cluster 1	GCA_016504605.1	Bacteria;Pseudomonadota;Gammaproteobacteria;Enterobacterales;Enterobacteriaceae;Citrobacter;Citrobacter braakii	Citrobacter braakii	411651	96.38	3.2	Human	Scaffold	ftp://ftp.ncbi.nlm.nih.gov/genomes/all/GCA/016/504/605/GCA_016504605.1_ASM1650460v1
Cluster 1	GCA_016592295.1	Bacteria;Pseudomonadota;Gammaproteobacteria;Aeromonadales;Aeromonadaceae;Aeromonas;Aeromonas hydrophila	Aeromonas hydrophila	4962727	98.27	2.13	Human	Completed Genome	ftp://ftp.ncbi.nlm.nih.gov/genomes/all/GCA/016/592/295/GCA_016592295.1_ASM1659229v1
Cluster 1	GCA_016653695.1	Bacteria;Pseudomonadota;Gammaproteobacteria;Aeromonadales;Aeromonadaceae;Aeromonas;Aeromonas media	Aeromonas media	4923283	97.26	1.45	Environment	Completed Genome	ftp://ftp.ncbi.nlm.nih.gov/genomes/all/GCA/016/653/695/GCA_016653695.1_ASM1665369v1
Cluster 1	GCA_016679915.1	Bacteria;Pseudomonadota;Gammaproteobacteria;Enterobacterales;Enterobacteriaceae;Citrobacter;Citrobacter youngae	Citrobacter youngae	820315	99.36	2.25	Animal	Scaffold	ftp://ftp.ncbi.nlm.nih.gov/genomes/all/GCA/016/679/915/GCA_016679915.1_ASM1667991v1
Cluster 1	GCA_016820295.1	Bacteria;Pseudomonadota;Gammaproteobacteria;Pasteurellales;Pasteurellaceae;Pasteurella;Pasteurella multocida	Pasteurella multocida	354083	99.55	0	Animal	Scaffold	ftp://ftp.ncbi.nlm.nih.gov/genomes/all/GCA/016/820/295/GCA_016820295.1_ASM1682029v1
Cluster 1	GCA_016834555.1	Bacteria;Pseudomonadota;Gammaproteobacteria;Vibrionales;Vibrionaceae;Vibrio;Vibrio parahaemolyticus	Vibrio parahaemolyticus	598901	98.71	1.76	Animal	Chromosome	ftp://ftp.ncbi.nlm.nih.gov/genomes/all/GCA/016/834/555/GCA_016834555.1_ASM1683455v1
Cluster 1	GCA_016859065.1	Bacteria;Pseudomonadota;Gammaproteobacteria;Enterobacterales;Enterobacteriaceae;Citrobacter;Citrobacter freundii	Citrobacter freundii	536394	95.61	1.99	Animal	Scaffold	ftp://ftp.ncbi.nlm.nih.gov/genomes/all/GCA/016/859/065/GCA_016859065.1_ASM1685906v1
Cluster 1	GCA_016864075.1	Bacteria;Pseudomonadota;Gammaproteobacteria;Enterobacterales;Enterobacteriaceae;Enterobacter;Enterobacter cloacae	Enterobacter cloacae	4483402	99.92	0.15	Human	Completed Genome	ftp://ftp.ncbi.nlm.nih.gov/genomes/all/GCA/016/864/075/GCA_016864075.1_ASM1686407v1
Cluster 1	GCA_016864095.1	Bacteria;Pseudomonadota;Gammaproteobacteria;Enterobacterales;Enterobacteriaceae;Enterobacter;Enterobacter cloacae	Enterobacter cloacae	4594958	99.95	0.48	Human	Completed Genome	ftp://ftp.ncbi.nlm.nih.gov/genomes/all/GCA/016/864/095/GCA_016864095.1_ASM1686409v1
Cluster 1	GCA_016864115.1	Bacteria;Pseudomonadota;Gammaproteobacteria;Enterobacterales;Enterobacteriaceae;Enterobacter;Enterobacter cloacae	Enterobacter cloacae	5006044	99.97	0.43	Human	Completed Genome	ftp://ftp.ncbi.nlm.nih.gov/genomes/all/GCA/016/864/115/GCA_016864115.1_ASM1686411v1
Cluster 1	GCA_016865345.1	Bacteria;Pseudomonadota;Gammaproteobacteria;Aeromonadales;Aeromonadaceae;Aeromonas;Aeromonas jandaei	Aeromonas jandaei	4534922	98.67	0.52	Human	Completed Genome	ftp://ftp.ncbi.nlm.nih.gov/genomes/all/GCA/016/865/345/GCA_016865345.1_ASM1686534v1
Cluster 1	GCA_016876175.1	Bacteria;Pseudomonadota;Gammaproteobacteria;Vibrionales;Vibrionaceae;Vibrio;Vibrio parahaemolyticus	Vibrio parahaemolyticus	415557	99.73	0.41	Environment	Scaffold	ftp://ftp.ncbi.nlm.nih.gov/genomes/all/GCA/016/876/175/GCA_016876175.1_ASM1687617v1
Cluster 1	GCA_016939495.1	Bacteria;Pseudomonadota;Gammaproteobacteria;Enterobacterales;Enterobacteriaceae;Klebsiella;Klebsiella aerogenes	Klebsiella aerogenes	5110296	95.64	1.79	Human	Completed Genome	ftp://ftp.ncbi.nlm.nih.gov/genomes/all/GCA/016/939/495/GCA_016939495.1_ASM1693949v1
Cluster 1	GCA_017151305.1	Bacteria;Pseudomonadota;Gammaproteobacteria;Enterobacterales;Enterobacteriaceae;Enterobacter;Enterobacter asburiae	Enterobacter asburiae	238115	99.97	0.74	Animal	Scaffold	ftp://ftp.ncbi.nlm.nih.gov/genomes/all/GCA/017/151/305/GCA_017151305.1_ASM1715130v1
Cluster 1	GCA_017151325.1	Bacteria;Pseudomonadota;Gammaproteobacteria;Enterobacterales;Enterobacteriaceae;Enterobacter;Enterobacter cloacae	Enterobacter cloacae	415624	98.88	0.53	Environment	Scaffold	ftp://ftp.ncbi.nlm.nih.gov/genomes/all/GCA/017/151/325/GCA_017151325.1_ASM1715132v1
Cluster 1	GCA_017151375.1	Bacteria;Pseudomonadota;Gammaproteobacteria;Enterobacterales;Enterobacteriaceae;Enterobacter;Enterobacter asburiae	Enterobacter asburiae	238115	99.97	0.74	Animal	Scaffold	ftp://ftp.ncbi.nlm.nih.gov/genomes/all/GCA/017/151/375/GCA_017151375.1_ASM1715137v1
Cluster 1	GCA_017151395.1	Bacteria;Pseudomonadota;Gammaproteobacteria;Enterobacterales;Enterobacteriaceae;Enterobacter;Enterobacter hormaechei	Enterobacter hormaechei	341251	99.61	0.69	Environment	Scaffold	ftp://ftp.ncbi.nlm.nih.gov/genomes/all/GCA/017/151/395/GCA_017151395.1_ASM1715139v1
Cluster 1	GCA_017151495.1	Bacteria;Pseudomonadota;Gammaproteobacteria;Enterobacterales;Enterobacteriaceae;Citrobacter;Citrobacter braakii	Citrobacter braakii	676623	99.78	4.57	Animal	Scaffold	ftp://ftp.ncbi.nlm.nih.gov/genomes/all/GCA/017/151/495/GCA_017151495.1_ASM1715149v1
Cluster 1	GCA_017151595.1	Bacteria;Pseudomonadota;Gammaproteobacteria;Enterobacterales;Enterobacteriaceae;Citrobacter;Citrobacter freundii	Citrobacter freundii	452434	98.26	4.33	Animal	Scaffold	ftp://ftp.ncbi.nlm.nih.gov/genomes/all/GCA/017/151/595/GCA_017151595.1_ASM1715159v1
Cluster 1	GCA_017160835.1	Bacteria;Pseudomonadota;Gammaproteobacteria;Pasteurellales;Pasteurellaceae;Aggregatibacter;Aggregatibacter actinomycetemcomitans	Aggregatibacter actinomycetemcomitans	70279	97.9	0.89	Animal	Scaffold	ftp://ftp.ncbi.nlm.nih.gov/genomes/all/GCA/017/160/835/GCA_017160835.1_ASM1716083v1
Cluster 1	GCA_017160845.1	Bacteria;Pseudomonadota;Gammaproteobacteria;Pasteurellales;Pasteurellaceae;Aggregatibacter;Aggregatibacter actinomycetemcomitans	Aggregatibacter actinomycetemcomitans	109909	97.36	0.46	Animal	Scaffold	ftp://ftp.ncbi.nlm.nih.gov/genomes/all/GCA/017/160/845/GCA_017160845.1_ASM1716084v1
Cluster 1	GCA_017160915.1	Bacteria;Pseudomonadota;Gammaproteobacteria;Pasteurellales;Pasteurellaceae;Aggregatibacter;Aggregatibacter actinomycetemcomitans	Aggregatibacter actinomycetemcomitans	60457	99.57	1.01	Animal	Scaffold	ftp://ftp.ncbi.nlm.nih.gov/genomes/all/GCA/017/160/915/GCA_017160915.1_ASM1716091v1
Cluster 1	GCA_017160985.1	Bacteria;Pseudomonadota;Gammaproteobacteria;Pasteurellales;Pasteurellaceae;Aggregatibacter;Aggregatibacter actinomycetemcomitans	Aggregatibacter actinomycetemcomitans	54176	97.03	0.59	Animal	Scaffold	ftp://ftp.ncbi.nlm.nih.gov/genomes/all/GCA/017/160/985/GCA_017160985.1_ASM1716098v1
Cluster 1	GCA_017161465.1	Bacteria;Pseudomonadota;Gammaproteobacteria;Vibrionales;Vibrionaceae;Vibrio;Vibrio alginolyticus	Vibrio alginolyticus	3294371	99.6	0.89	Animal	Chromosome	ftp://ftp.ncbi.nlm.nih.gov/genomes/all/GCA/017/161/465/GCA_017161465.1_ASM1716146v1
Cluster 1	GCA_017164195.1	Bacteria;Pseudomonadota;Gammaproteobacteria;Enterobacterales;Enterobacteriaceae;Escherichia;Escherichia coli	Escherichia coli	174397	97.72	0.26	Human	Scaffold	ftp://ftp.ncbi.nlm.nih.gov/genomes/all/GCA/017/164/195/GCA_017164195.1_ASM1716419v1
Cluster 1	GCA_017164335.1	Bacteria;Pseudomonadota;Gammaproteobacteria;Enterobacterales;Enterobacteriaceae;Escherichia;Escherichia coli	Escherichia coli	150376	98.23	0.8	Human	Scaffold	ftp://ftp.ncbi.nlm.nih.gov/genomes/all/GCA/017/164/335/GCA_017164335.1_ASM1716433v1
Cluster 1	GCA_017309725.1	Bacteria;Pseudomonadota;Gammaproteobacteria;Enterobacterales;Enterobacteriaceae;Enterobacter;Enterobacter roggenkampii	Enterobacter roggenkampii	103700	98.78	1.45	Human	Scaffold	ftp://ftp.ncbi.nlm.nih.gov/genomes/all/GCA/017/309/725/GCA_017309725.1_ASM1730972v1
Cluster 1	GCA_017310175.1	Bacteria;Pseudomonadota;Gammaproteobacteria;Aeromonadales;Aeromonadaceae;Aeromonas;Aeromonas jandaei	Aeromonas jandaei	693723	98.82	0.38	Animal	Chromosome	ftp://ftp.ncbi.nlm.nih.gov/genomes/all/GCA/017/310/175/GCA_017310175.1_ASM1731017v1
Cluster 1	GCA_017310195.1	Bacteria;Pseudomonadota;Gammaproteobacteria;Aeromonadales;Aeromonadaceae;Aeromonas;Aeromonas hydrophila	Aeromonas hydrophila	4765114	97.65	1.12	Animal	Completed Genome	ftp://ftp.ncbi.nlm.nih.gov/genomes/all/GCA/017/310/195/GCA_017310195.1_ASM1731019v1
Cluster 1	GCA_017310235.1	Bacteria;Pseudomonadota;Gammaproteobacteria;Aeromonadales;Aeromonadaceae;Aeromonas;Aeromonas dhakensis	Aeromonas dhakensis	4933619	99.93	0.45	Human	Completed Genome	ftp://ftp.ncbi.nlm.nih.gov/genomes/all/GCA/017/310/235/GCA_017310235.1_ASM1731023v1
Cluster 1	GCA_017310275.1	Bacteria;Pseudomonadota;Gammaproteobacteria;Aeromonadales;Aeromonadaceae;Aeromonas;Aeromonas veronii	Aeromonas veronii	4500467	98.86	1.7	Human	Completed Genome	ftp://ftp.ncbi.nlm.nih.gov/genomes/all/GCA/017/310/275/GCA_017310275.1_ASM1731027v1
Cluster 1	GCA_017347405.1	Bacteria;Pseudomonadota;Gammaproteobacteria;Enterobacterales;Enterobacteriaceae;Enterobacter;Enterobacter cloacae	Enterobacter cloacae	4846950	98.68	0.66	Animal	Completed Genome	ftp://ftp.ncbi.nlm.nih.gov/genomes/all/GCA/017/347/405/GCA_017347405.1_ASM1734740v1
Cluster 1	GCA_017347425.1	Bacteria;Pseudomonadota;Gammaproteobacteria;Enterobacterales;Enterobacteriaceae;Enterobacter;Enterobacter asburiae	Enterobacter asburiae	4722066	99.97	0.67	Animal	Completed Genome	ftp://ftp.ncbi.nlm.nih.gov/genomes/all/GCA/017/347/425/GCA_017347425.1_ASM1734742v1
Cluster 1	GCA_017474165.1	Bacteria;Pseudomonadota;Gammaproteobacteria;Enterobacterales;Erwiniaceae;Pantoea;Pantoea agglomerans	Pantoea agglomerans	4169790	98.68	2.51	Enironment	Completed Genome	ftp://ftp.ncbi.nlm.nih.gov/genomes/all/GCA/017/474/165/GCA_017474165.1_ASM1747416v1
Cluster 1	GCA_017750905.1	Bacteria;Pseudomonadota;Gammaproteobacteria;Aeromonadales;Aeromonadaceae;Aeromonas;Aeromonas jandaei	Aeromonas jandaei	3294890	98.97	0.63	Environment	Chromosome	ftp://ftp.ncbi.nlm.nih.gov/genomes/all/GCA/017/750/905/GCA_017750905.1_ASM1775090v1
Cluster 1	GCA_017814615.1	Bacteria;Pseudomonadota;Gammaproteobacteria;Vibrionales;Vibrionaceae;Vibrio;Vibrio cholerae	Vibrio cholerae	193266	99.96	0.05	Human	Scaffold	ftp://ftp.ncbi.nlm.nih.gov/genomes/all/GCA/017/814/615/GCA_017814615.1_ASM1781461v1
Cluster 1	GCA_018035165.1	Bacteria;Pseudomonadota;Gammaproteobacteria;Vibrionales;Vibrionaceae;Vibrio;Vibrio paracholerae	Vibrio cholerae	128330	99.82	0.84	Environment	Scaffold	ftp://ftp.ncbi.nlm.nih.gov/genomes/all/GCA/018/035/165/GCA_018035165.1_ASM1803516v1
Cluster 1	GCA_018128425.1	Bacteria;Pseudomonadota;Gammaproteobacteria;Enterobacterales;Enterobacteriaceae;Citrobacter;Citrobacter sedlakii	Citrobacter sedlakii	4756279	98.85	1.44	Human	Completed Genome	ftp://ftp.ncbi.nlm.nih.gov/genomes/all/GCA/018/128/425/GCA_018128425.1_ASM1812842v1
Cluster 1	GCA_018140965.1	Bacteria;Pseudomonadota;Gammaproteobacteria;Enterobacterales;Enterobacteriaceae;Enterobacter;Enterobacter cloacae	Enterobacter cloacae	5419017	98.81	0.37	Environment	Completed Genome	ftp://ftp.ncbi.nlm.nih.gov/genomes/all/GCA/018/140/965/GCA_018140965.1_ASM1814096v1
Cluster 1	GCA_018141245.1	Bacteria;Pseudomonadota;Gammaproteobacteria;Enterobacterales;Enterobacteriaceae;Escherichia;Escherichia coli	Escherichia coli	4631653	97.01	0.66	Animal	Completed Genome	ftp://ftp.ncbi.nlm.nih.gov/genomes/all/GCA/018/141/245/GCA_018141245.1_ASM1814124v1
Cluster 1	GCA_018257755.1	Bacteria;Pseudomonadota;Gammaproteobacteria;Enterobacterales;Enterobacteriaceae;Enterobacter;Enterobacter mori	Enterobacter mori	507969	98.96	0.03	Animal	Scaffold	ftp://ftp.ncbi.nlm.nih.gov/genomes/all/GCA/018/257/755/GCA_018257755.1_ASM1825775v1
Cluster 1	GCA_018257775.1	Bacteria;Pseudomonadota;Gammaproteobacteria;Enterobacterales;Enterobacteriaceae;Enterobacter;Enterobacter asburiae	Enterobacter asburiae	485538	99.92	0.63	Animal	Scaffold	ftp://ftp.ncbi.nlm.nih.gov/genomes/all/GCA/018/257/775/GCA_018257775.1_ASM1825777v1
Cluster 1	GCA_018278705.1	Bacteria;Pseudomonadota;Gammaproteobacteria;Enterobacterales;Enterobacteriaceae;Klebsiella;Klebsiella aerogenes	Klebsiella aerogenes	5116173	96.45	0.74	Human	Chromosome	ftp://ftp.ncbi.nlm.nih.gov/genomes/all/GCA/018/278/705/GCA_018278705.1_ASM1827870v1
Cluster 1	GCA_018420675.1	Bacteria;Pseudomonadota;Gammaproteobacteria;Enterobacterales;Enterobacteriaceae;Citrobacter;Citrobacter braakii	Citrobacter braakii	281554	97.15	3.01	Human	Scaffold	ftp://ftp.ncbi.nlm.nih.gov/genomes/all/GCA/018/420/675/GCA_018420675.1_ASM1842067v1
Cluster 1	GCA_018420725.1	Bacteria;Pseudomonadota;Gammaproteobacteria;Enterobacterales;Enterobacteriaceae;Citrobacter;Citrobacter freundii	Citrobacter freundii	234257	99.9	0.7	Human	Scaffold	ftp://ftp.ncbi.nlm.nih.gov/genomes/all/GCA/018/420/725/GCA_018420725.1_ASM1842072v1
Cluster 1	GCA_018421715.1	Bacteria;Pseudomonadota;Gammaproteobacteria;Enterobacterales;Enterobacteriaceae;Citrobacter;Citrobacter freundii	Citrobacter freundii	89150	97.35	4.46	Human	Scaffold	ftp://ftp.ncbi.nlm.nih.gov/genomes/all/GCA/018/421/715/GCA_018421715.1_ASM1842171v1
Cluster 1	GCA_018422855.1	Bacteria;Pseudomonadota;Gammaproteobacteria;Enterobacterales;Enterobacteriaceae;Escherichia;Escherichia coli	Escherichia coli	66242	96.5	1.37	Human	Scaffold	ftp://ftp.ncbi.nlm.nih.gov/genomes/all/GCA/018/422/855/GCA_018422855.1_ASM1842285v1
Cluster 1	GCA_018428005.1	Bacteria;Pseudomonadota;Gammaproteobacteria;Enterobacterales;Enterobacteriaceae;Escherichia;Escherichia coli	Escherichia coli	249675	99.93	0.35	Animal	Scaffold	ftp://ftp.ncbi.nlm.nih.gov/genomes/all/GCA/018/428/005/GCA_018428005.1_ASM1842800v1
Cluster 1	GCA_018430465.1	Bacteria;Pseudomonadota;Gammaproteobacteria;Enterobacterales;Enterobacteriaceae;Escherichia;Escherichia coli	Escherichia coli	215081	99.91	0.67	Animal	Scaffold	ftp://ftp.ncbi.nlm.nih.gov/genomes/all/GCA/018/430/465/GCA_018430465.1_ASM1843046v1
Cluster 1	GCA_018431705.1	Bacteria;Pseudomonadota;Gammaproteobacteria;Enterobacterales;Enterobacteriaceae;Escherichia;Escherichia coli	Escherichia coli	107186	99.91	0.11	Animal	Scaffold	ftp://ftp.ncbi.nlm.nih.gov/genomes/all/GCA/018/431/705/GCA_018431705.1_ASM1843170v1
Cluster 1	GCA_018439245.1	Bacteria;Pseudomonadota;Gammaproteobacteria;Enterobacterales;Enterobacteriaceae;Citrobacter;Citrobacter freundii	Citrobacter freundii	692528	97.11	3.4	Human	Scaffold	ftp://ftp.ncbi.nlm.nih.gov/genomes/all/GCA/018/439/245/GCA_018439245.1_ASM1843924v1
Cluster 1	GCA_018441245.1	Bacteria;Pseudomonadota;Gammaproteobacteria;Enterobacterales;Enterobacteriaceae;Enterobacter;Enterobacter hormaechei	Enterobacter hormaechei subsp. xiangfangensis	509146	99.52	0.23	Human	Scaffold	ftp://ftp.ncbi.nlm.nih.gov/genomes/all/GCA/018/441/245/GCA_018441245.1_ASM1844124v1
Cluster 1	GCA_018442145.1	Bacteria;Pseudomonadota;Gammaproteobacteria;Enterobacterales;Enterobacteriaceae;Citrobacter;Citrobacter freundii	Citrobacter freundii	123667	99.9	0.35	Human	Scaffold	ftp://ftp.ncbi.nlm.nih.gov/genomes/all/GCA/018/442/145/GCA_018442145.1_ASM1844214v1
Cluster 1	GCA_018444815.1	Bacteria;Pseudomonadota;Gammaproteobacteria;Enterobacterales;Enterobacteriaceae;Citrobacter;Citrobacter freundii	Citrobacter freundii	77323	100	1.17	Human	Scaffold	ftp://ftp.ncbi.nlm.nih.gov/genomes/all/GCA/018/444/815/GCA_018444815.1_ASM1844481v1
Cluster 1	GCA_018445745.1	Bacteria;Pseudomonadota;Gammaproteobacteria;Enterobacterales;Enterobacteriaceae;Enterobacter;Enterobacter asburiae	Enterobacter asburiae	118053	99.97	0.65	Human	Scaffold	ftp://ftp.ncbi.nlm.nih.gov/genomes/all/GCA/018/445/745/GCA_018445745.1_ASM1844574v1
Cluster 1	GCA_018446115.1	Bacteria;Pseudomonadota;Gammaproteobacteria;Enterobacterales;Enterobacteriaceae;Enterobacter;Enterobacter hormaechei	Enterobacter hormaechei subsp. xiangfangensis	128771	99.47	0.68	Human	Scaffold	ftp://ftp.ncbi.nlm.nih.gov/genomes/all/GCA/018/446/115/GCA_018446115.1_ASM1844611v1
Cluster 1	GCA_018447175.1	Bacteria;Pseudomonadota;Gammaproteobacteria;Enterobacterales;Enterobacteriaceae;Enterobacter;Enterobacter kobei	Enterobacter kobei	511149	99.7	0.46	Human	Scaffold	ftp://ftp.ncbi.nlm.nih.gov/genomes/all/GCA/018/447/175/GCA_018447175.1_ASM1844717v1
Cluster 1	GCA_018447335.1	Bacteria;Pseudomonadota;Gammaproteobacteria;Enterobacterales;Enterobacteriaceae;Klebsiella;Klebsiella aerogenes	Klebsiella aerogenes	335031	95.87	1.74	Human	Scaffold	ftp://ftp.ncbi.nlm.nih.gov/genomes/all/GCA/018/447/335/GCA_018447335.1_ASM1844733v1
Cluster 1	GCA_018447355.1	Bacteria;Pseudomonadota;Gammaproteobacteria;Enterobacterales;Enterobacteriaceae;Enterobacter;Enterobacter hormaechei	Enterobacter hormaechei subsp. xiangfangensis	294390	99.52	0.26	Human	Scaffold	ftp://ftp.ncbi.nlm.nih.gov/genomes/all/GCA/018/447/355/GCA_018447355.1_ASM1844735v1
Cluster 1	GCA_018457365.1	Bacteria;Pseudomonadota;Gammaproteobacteria;Vibrionales;Vibrionaceae;Vibrio;Vibrio alginolyticus	Vibrio alginolyticus	444771	98.25	0.45	Environment	Scaffold	ftp://ftp.ncbi.nlm.nih.gov/genomes/all/GCA/018/457/365/GCA_018457365.1_ASM1845736v1
Cluster 1	GCA_018457405.1	Bacteria;Pseudomonadota;Gammaproteobacteria;Vibrionales;Vibrionaceae;Vibrio;Vibrio alginolyticus	Vibrio alginolyticus	230457	97.84	1.01	Environment	Scaffold	ftp://ftp.ncbi.nlm.nih.gov/genomes/all/GCA/018/457/405/GCA_018457405.1_ASM1845740v1
Cluster 1	GCA_018457415.1	Bacteria;Pseudomonadota;Gammaproteobacteria;Vibrionales;Vibrionaceae;Vibrio;Vibrio alginolyticus	Vibrio alginolyticus	246089	98.06	0.95	Environment	Scaffold	ftp://ftp.ncbi.nlm.nih.gov/genomes/all/GCA/018/457/415/GCA_018457415.1_ASM1845741v1
Cluster 1	GCA_018457845.1	Bacteria;Pseudomonadota;Gammaproteobacteria;Vibrionales;Vibrionaceae;Vibrio;Vibrio alginolyticus	Vibrio alginolyticus	685955	97.72	0.41	Environment	Scaffold	ftp://ftp.ncbi.nlm.nih.gov/genomes/all/GCA/018/457/845/GCA_018457845.1_ASM1845784v1
Cluster 1	GCA_018458405.1	Bacteria;Pseudomonadota;Gammaproteobacteria;Vibrionales;Vibrionaceae;Vibrio;Vibrio alginolyticus	Vibrio alginolyticus	215316	98.25	1.48	Environment	Scaffold	ftp://ftp.ncbi.nlm.nih.gov/genomes/all/GCA/018/458/405/GCA_018458405.1_ASM1845840v1
Cluster 1	GCA_018638795.1	Bacteria;Pseudomonadota;Gammaproteobacteria;Enterobacterales;Enterobacteriaceae;Enterobacter;Enterobacter mori	Enterobacter mori	4772939	99.34	0.22	Human	Completed Genome	ftp://ftp.ncbi.nlm.nih.gov/genomes/all/GCA/018/638/795/GCA_018638795.1_ASM1863879v1
Cluster 1	GCA_018779775.1	Bacteria;Pseudomonadota;Gammaproteobacteria;Vibrionales;Vibrionaceae;Vibrio;Vibrio alginolyticus	Vibrio alginolyticus	265287	98.41	2.03	Environment	Scaffold	ftp://ftp.ncbi.nlm.nih.gov/genomes/all/GCA/018/779/775/GCA_018779775.1_ASM1877977v1
Cluster 1	GCA_018802265.1	Bacteria;Pseudomonadota;Gammaproteobacteria;Aeromonadales;Aeromonadaceae;Aeromonas;Aeromonas jandaei	Aeromonas jandaei	4535455	100	1.17	Animal	Completed Genome	ftp://ftp.ncbi.nlm.nih.gov/genomes/all/GCA/018/802/265/GCA_018802265.1_ASM1880226v1
Cluster 1	GCA_018802325.1	Bacteria;Pseudomonadota;Gammaproteobacteria;Aeromonadales;Aeromonadaceae;Aeromonas;Aeromonas jandaei	Aeromonas jandaei	4507629	97.88	0.53	Animal	Completed Genome	ftp://ftp.ncbi.nlm.nih.gov/genomes/all/GCA/018/802/325/GCA_018802325.1_ASM1880232v1
Cluster 1	GCA_018802345.1	Bacteria;Pseudomonadota;Gammaproteobacteria;Aeromonadales;Aeromonadaceae;Aeromonas;Aeromonas hydrophila	Aeromonas hydrophila	4762881	99.82	0	Animal	Completed Genome	ftp://ftp.ncbi.nlm.nih.gov/genomes/all/GCA/018/802/345/GCA_018802345.1_ASM1880234v1
Cluster 1	GCA_018802385.1	Bacteria;Pseudomonadota;Gammaproteobacteria;Aeromonadales;Aeromonadaceae;Aeromonas;Aeromonas hydrophila	Aeromonas hydrophila	5130685	97.12	3.78	Animal	Completed Genome	ftp://ftp.ncbi.nlm.nih.gov/genomes/all/GCA/018/802/385/GCA_018802385.1_ASM1880238v1
Cluster 1	GCA_018906685.1	Bacteria;Pseudomonadota;Gammaproteobacteria;Enterobacterales;Enterobacteriaceae;Cedecea;Cedecea davisae	Cedecea davisae	299392	99.51	0	Human	Scaffold	ftp://ftp.ncbi.nlm.nih.gov/genomes/all/GCA/018/906/685/GCA_018906685.1_ASM1890668v1
Cluster 1	GCA_018920425.1	Bacteria;Pseudomonadota;Gammaproteobacteria;Vibrionales;Vibrionaceae;Vibrio;Vibrio cholerae	Vibrio cholerae	128037	97.39	0.47	Environment	Scaffold	ftp://ftp.ncbi.nlm.nih.gov/genomes/all/GCA/018/920/425/GCA_018920425.1_ASM1892042v1
Cluster 1	GCA_019012175.1	Bacteria;Pseudomonadota;Gammaproteobacteria;Enterobacterales;Enterobacteriaceae;Enterobacter;Enterobacter bugandensis	Enterobacter bugandensis	252288	98.68	0.87	Human	Scaffold	ftp://ftp.ncbi.nlm.nih.gov/genomes/all/GCA/019/012/175/GCA_019012175.1_ASM1901217v1
Cluster 1	GCA_019092345.1	Bacteria;Pseudomonadota;Gammaproteobacteria;Vibrionales;Vibrionaceae;Vibrio;Vibrio metschnikovii	Vibrio metschnikovii	608040	97.11	0.68	Animal	Scaffold	ftp://ftp.ncbi.nlm.nih.gov/genomes/all/GCA/019/092/345/GCA_019092345.1_ASM1909234v1
Cluster 1	GCA_019092385.1	Bacteria;Pseudomonadota;Gammaproteobacteria;Vibrionales;Vibrionaceae;Vibrio;Vibrio metschnikovii	Vibrio metschnikovii	265961	98.51	0.59	Animal	Scaffold	ftp://ftp.ncbi.nlm.nih.gov/genomes/all/GCA/019/092/385/GCA_019092385.1_ASM1909238v1
Cluster 1	GCA_019092705.1	Bacteria;Pseudomonadota;Gammaproteobacteria;Vibrionales;Vibrionaceae;Vibrio;Vibrio cholerae	Vibrio cholerae	327394	95.15	2.36	Animal	Scaffold	ftp://ftp.ncbi.nlm.nih.gov/genomes/all/GCA/019/092/705/GCA_019092705.1_ASM1909270v1
Cluster 1	GCA_019092765.1	Bacteria;Pseudomonadota;Gammaproteobacteria;Vibrionales;Vibrionaceae;Vibrio;Vibrio cholerae	Vibrio cholerae	327394	95.16	2.36	Animal	Scaffold	ftp://ftp.ncbi.nlm.nih.gov/genomes/all/GCA/019/092/765/GCA_019092765.1_ASM1909276v1
Cluster 1	GCA_019092825.1	Bacteria;Pseudomonadota;Gammaproteobacteria;Vibrionales;Vibrionaceae;Vibrio;Vibrio cholerae	Vibrio cholerae	285376	95.38	2.22	Animal	Scaffold	ftp://ftp.ncbi.nlm.nih.gov/genomes/all/GCA/019/092/825/GCA_019092825.1_ASM1909282v1
Cluster 1	GCA_019093085.1	Bacteria;Pseudomonadota;Gammaproteobacteria;Vibrionales;Vibrionaceae;Vibrio;Vibrio cholerae	Vibrio cholerae	330324	95.12	2.43	Animal	Scaffold	ftp://ftp.ncbi.nlm.nih.gov/genomes/all/GCA/019/093/085/GCA_019093085.1_ASM1909308v1
Cluster 1	GCA_019203945.1	Bacteria;Pseudomonadota;Gammaproteobacteria;Enterobacterales;Enterobacteriaceae;Enterobacter;Enterobacter mori	Enterobacter mori	4966908	99.61	0.21	Enironment	Completed Genome	ftp://ftp.ncbi.nlm.nih.gov/genomes/all/GCA/019/203/945/GCA_019203945.1_ASM1920394v1
Cluster 1	GCA_019348625.1	Bacteria;Pseudomonadota;Gammaproteobacteria;Aeromonadales;Aeromonadaceae;Aeromonas;Aeromonas veronii	Aeromonas veronii	312883	97.17	3.48	Animal	Scaffold	ftp://ftp.ncbi.nlm.nih.gov/genomes/all/GCA/019/348/625/GCA_019348625.1_ASM1934862v1
Cluster 1	GCA_019348635.1	Bacteria;Pseudomonadota;Gammaproteobacteria;Aeromonadales;Aeromonadaceae;Aeromonas;Aeromonas hydrophila	Aeromonas hydrophila	332754	96.65	1.3	Environment	Scaffold	ftp://ftp.ncbi.nlm.nih.gov/genomes/all/GCA/019/348/635/GCA_019348635.1_ASM1934863v1
Cluster 1	GCA_019348715.1	Bacteria;Pseudomonadota;Gammaproteobacteria;Aeromonadales;Aeromonadaceae;Aeromonas;Aeromonas jandaei	Aeromonas jandaei	1012657	96.38	1.24	Animal	Scaffold	ftp://ftp.ncbi.nlm.nih.gov/genomes/all/GCA/019/348/715/GCA_019348715.1_ASM1934871v1
Cluster 1	GCA_019351595.1	Bacteria;Pseudomonadota;Gammaproteobacteria;Enterobacterales;Enterobacteriaceae;Enterobacter;Enterobacter cloacae	Enterobacter cloacae subsp. cloacae	246482	99.97	0.41	Human	Scaffold	ftp://ftp.ncbi.nlm.nih.gov/genomes/all/GCA/019/351/595/GCA_019351595.1_ASM1935159v1
Cluster 1	GCA_019351605.1	Bacteria;Pseudomonadota;Gammaproteobacteria;Enterobacterales;Enterobacteriaceae;Enterobacter;Enterobacter asburiae	Enterobacter asburiae	215596	99.97	0.44	Human	Scaffold	ftp://ftp.ncbi.nlm.nih.gov/genomes/all/GCA/019/351/605/GCA_019351605.1_ASM1935160v1
Cluster 1	GCA_019351615.1	Bacteria;Pseudomonadota;Gammaproteobacteria;Enterobacterales;Enterobacteriaceae;Enterobacter;Enterobacter kobei	Enterobacter kobei	151477	99.7	1.19	Human	Scaffold	ftp://ftp.ncbi.nlm.nih.gov/genomes/all/GCA/019/351/615/GCA_019351615.1_ASM1935161v1
Cluster 1	GCA_019351665.1	Bacteria;Pseudomonadota;Gammaproteobacteria;Enterobacterales;Enterobacteriaceae;Enterobacter;Enterobacter bugandensis	Enterobacter bugandensis	680518	96.06	0.03	Human	Scaffold	ftp://ftp.ncbi.nlm.nih.gov/genomes/all/GCA/019/351/665/GCA_019351665.1_ASM1935166v1
Cluster 1	GCA_019351705.1	Bacteria;Pseudomonadota;Gammaproteobacteria;Enterobacterales;Enterobacteriaceae;Enterobacter;Enterobacter roggenkampii	Enterobacter roggenkampii	68193	99	0.56	Human	Scaffold	ftp://ftp.ncbi.nlm.nih.gov/genomes/all/GCA/019/351/705/GCA_019351705.1_ASM1935170v1
Cluster 1	GCA_019351715.1	Bacteria;Pseudomonadota;Gammaproteobacteria;Enterobacterales;Enterobacteriaceae;Enterobacter;Enterobacter roggenkampii	Enterobacter roggenkampii	488395	99.07	0.04	Human	Scaffold	ftp://ftp.ncbi.nlm.nih.gov/genomes/all/GCA/019/351/715/GCA_019351715.1_ASM1935171v1
Cluster 1	GCA_019351775.1	Bacteria;Pseudomonadota;Gammaproteobacteria;Enterobacterales;Enterobacteriaceae;Enterobacter;Enterobacter cloacae	Enterobacter cloacae subsp. cloacae	175610	95.09	1.07	Human	Scaffold	ftp://ftp.ncbi.nlm.nih.gov/genomes/all/GCA/019/351/775/GCA_019351775.1_ASM1935177v1
Cluster 1	GCA_019351845.1	Bacteria;Pseudomonadota;Gammaproteobacteria;Enterobacterales;Enterobacteriaceae;Enterobacter;Enterobacter roggenkampii	Enterobacter roggenkampii	190685	99.59	0.74	Human	Scaffold	ftp://ftp.ncbi.nlm.nih.gov/genomes/all/GCA/019/351/845/GCA_019351845.1_ASM1935184v1
Cluster 1	GCA_019399935.1	Bacteria;Pseudomonadota;Gammaproteobacteria;Aeromonadales;Aeromonadaceae;Aeromonas;Aeromonas hydrophila	Aeromonas hydrophila	449174	95.22	0.76	Animal	Scaffold	ftp://ftp.ncbi.nlm.nih.gov/genomes/all/GCA/019/399/935/GCA_019399935.1_ASM1939993v1
Cluster 1	GCA_019443705.1	Bacteria;Pseudomonadota;Gammaproteobacteria;Enterobacterales;Enterobacteriaceae;Citrobacter;Citrobacter koseri	Citrobacter koseri	4767913	99.52	0.36	Human	Completed Genome	ftp://ftp.ncbi.nlm.nih.gov/genomes/all/GCA/019/443/705/GCA_019443705.1_ASM1944370v1
Cluster 1	GCA_019448995.1	Bacteria;Pseudomonadota;Gammaproteobacteria;Enterobacterales;Enterobacteriaceae;Enterobacter;Enterobacter roggenkampii	Enterobacter roggenkampii	177371	99.07	0.06	Human	Scaffold	ftp://ftp.ncbi.nlm.nih.gov/genomes/all/GCA/019/448/995/GCA_019448995.1_ASM1944899v1
Cluster 1	GCA_019449075.1	Bacteria;Pseudomonadota;Gammaproteobacteria;Enterobacterales;Enterobacteriaceae;Enterobacter;Enterobacter hormaechei	Enterobacter hormaechei	101564	99.77	0.48	Human	Scaffold	ftp://ftp.ncbi.nlm.nih.gov/genomes/all/GCA/019/449/075/GCA_019449075.1_ASM1944907v1
Cluster 1	GCA_019457865.1	Bacteria;Pseudomonadota;Gammaproteobacteria;Enterobacterales;Enterobacteriaceae;Enterobacter;Enterobacter mori	Enterobacter mori	415749	96.73	0.55	Human	Scaffold	ftp://ftp.ncbi.nlm.nih.gov/genomes/all/GCA/019/457/865/GCA_019457865.1_ASM1945786v1
Cluster 1	GCA_019458465.1	Bacteria;Pseudomonadota;Gammaproteobacteria;Vibrionales;Vibrionaceae;Vibrio;Vibrio cholerae	Vibrio cholerae	3145023	99.35	1.26	Animal	Completed Genome	ftp://ftp.ncbi.nlm.nih.gov/genomes/all/GCA/019/458/465/GCA_019458465.1_ASM1945846v1
Cluster 1	GCA_019458525.1	Bacteria;Pseudomonadota;Gammaproteobacteria;Enterobacterales;Enterobacteriaceae;Enterobacter;Enterobacter hormaechei	Enterobacter hormaechei	4743586	99.77	0.43	Human	Completed Genome	ftp://ftp.ncbi.nlm.nih.gov/genomes/all/GCA/019/458/525/GCA_019458525.1_ASM1945852v1
Cluster 1	GCA_019478765.2	Bacteria;Pseudomonadota;Gammaproteobacteria;Enterobacterales;Enterobacteriaceae;Escherichia;Escherichia coli	Escherichia coli	5173954	99.97	0.52	Human	Completed Genome	ftp://ftp.ncbi.nlm.nih.gov/genomes/all/GCA/019/478/765/GCA_019478765.2_ASM1947876v2
Cluster 1	GCA_019502645.1	Bacteria;Pseudomonadota;Gammaproteobacteria;Enterobacterales;Enterobacteriaceae;Citrobacter;Citrobacter braakii	Citrobacter braakii	4830928	99.97	1.66	Human	Completed Genome	ftp://ftp.ncbi.nlm.nih.gov/genomes/all/GCA/019/502/645/GCA_019502645.1_ASM1950264v1
Cluster 1	GCA_019551055.2	Bacteria;Pseudomonadota;Gammaproteobacteria;Enterobacterales;Enterobacteriaceae;Escherichia;Escherichia coli	Escherichia coli	4854807	99.97	0.04	Human	Completed Genome	ftp://ftp.ncbi.nlm.nih.gov/genomes/all/GCA/019/551/055/GCA_019551055.2_ASM1955105v2
Cluster 1	GCA_019599085.1	Bacteria;Pseudomonadota;Gammaproteobacteria;Alteromonadales;Shewanellaceae;Shewanella;Shewanella putrefaciens	Shewanella putrefaciens	5019740	99.84	0	Animal	Completed Genome	ftp://ftp.ncbi.nlm.nih.gov/genomes/all/GCA/019/599/085/GCA_019599085.1_ASM1959908v1
Cluster 1	GCA_019665745.1	Bacteria;Pseudomonadota;Gammaproteobacteria;Enterobacterales;Enterobacteriaceae;Enterobacter;Enterobacter cancerogenus	Enterobacter cancerogenus	2451850	99.03	0.96	Enironment	Chromosome	ftp://ftp.ncbi.nlm.nih.gov/genomes/all/GCA/019/665/745/GCA_019665745.1_ASM1966574v1
Cluster 1	GCA_019703635.1	Bacteria;Pseudomonadota;Gammaproteobacteria;Pasteurellales;Pasteurellaceae;Haemophilus;Haemophilus influenzae	Haemophilus influenzae	1818266	99.21	0.02	Human	Completed Genome	ftp://ftp.ncbi.nlm.nih.gov/genomes/all/GCA/019/703/635/GCA_019703635.1_ASM1970363v1
Cluster 1	GCA_019703675.1	Bacteria;Pseudomonadota;Gammaproteobacteria;Pasteurellales;Pasteurellaceae;Haemophilus;Haemophilus influenzae	Haemophilus influenzae	1884503	98.95	0.05	Human	Completed Genome	ftp://ftp.ncbi.nlm.nih.gov/genomes/all/GCA/019/703/675/GCA_019703675.1_ASM1970367v1
Cluster 1	GCA_019703695.1	Bacteria;Pseudomonadota;Gammaproteobacteria;Pasteurellales;Pasteurellaceae;Haemophilus;Haemophilus influenzae	Haemophilus influenzae	1911890	99.02	0.02	Human	Completed Genome	ftp://ftp.ncbi.nlm.nih.gov/genomes/all/GCA/019/703/695/GCA_019703695.1_ASM1970369v1
Cluster 1	GCA_019703735.1	Bacteria;Pseudomonadota;Gammaproteobacteria;Pasteurellales;Pasteurellaceae;Haemophilus;Haemophilus influenzae	Haemophilus influenzae	1882642	98.39	0.02	Human	Completed Genome	ftp://ftp.ncbi.nlm.nih.gov/genomes/all/GCA/019/703/735/GCA_019703735.1_ASM1970373v1
Cluster 1	GCA_019703755.1	Bacteria;Pseudomonadota;Gammaproteobacteria;Pasteurellales;Pasteurellaceae;Haemophilus;Haemophilus influenzae	Haemophilus influenzae	1953394	99.29	0	Human	Completed Genome	ftp://ftp.ncbi.nlm.nih.gov/genomes/all/GCA/019/703/755/GCA_019703755.1_ASM1970375v1
Cluster 1	GCA_019703775.1	Bacteria;Pseudomonadota;Gammaproteobacteria;Pasteurellales;Pasteurellaceae;Haemophilus;Haemophilus influenzae	Haemophilus influenzae	1790924	96.78	0.09	Human	Completed Genome	ftp://ftp.ncbi.nlm.nih.gov/genomes/all/GCA/019/703/775/GCA_019703775.1_ASM1970377v1
Cluster 1	GCA_019730815.1	Bacteria;Pseudomonadota;Gammaproteobacteria;Enterobacterales;Enterobacteriaceae;Enterobacter;Enterobacter kobei	Enterobacter kobei	389667	99.7	0.09	Human	Scaffold	ftp://ftp.ncbi.nlm.nih.gov/genomes/all/GCA/019/730/815/GCA_019730815.1_ASM1973081v1
Cluster 1	GCA_019730895.1	Bacteria;Pseudomonadota;Gammaproteobacteria;Enterobacterales;Enterobacteriaceae;Enterobacter;Enterobacter ludwigii	Enterobacter ludwigii	281183	96.23	0.76	Human	Scaffold	ftp://ftp.ncbi.nlm.nih.gov/genomes/all/GCA/019/730/895/GCA_019730895.1_ASM1973089v1
Cluster 1	GCA_019731005.1	Bacteria;Pseudomonadota;Gammaproteobacteria;Enterobacterales;Enterobacteriaceae;Citrobacter;Citrobacter freundii	Citrobacter freundii	468806	96.45	1.58	Human	Scaffold	ftp://ftp.ncbi.nlm.nih.gov/genomes/all/GCA/019/731/005/GCA_019731005.1_ASM1973100v1
Cluster 1	GCA_019731535.1	Bacteria;Pseudomonadota;Gammaproteobacteria;Enterobacterales;Enterobacteriaceae;Klebsiella;Klebsiella aerogenes	Klebsiella aerogenes	614655	95.1	2.92	Human	Scaffold	ftp://ftp.ncbi.nlm.nih.gov/genomes/all/GCA/019/731/535/GCA_019731535.1_ASM1973153v1
Cluster 1	GCA_019731755.1	Bacteria;Pseudomonadota;Gammaproteobacteria;Enterobacterales;Enterobacteriaceae;Enterobacter;Enterobacter ludwigii	Enterobacter ludwigii	667499	96.21	0.13	Human	Scaffold	ftp://ftp.ncbi.nlm.nih.gov/genomes/all/GCA/019/731/755/GCA_019731755.1_ASM1973175v1
Cluster 1	GCA_019731835.1	Bacteria;Pseudomonadota;Gammaproteobacteria;Enterobacterales;Enterobacteriaceae;Enterobacter;Enterobacter ludwigii	Enterobacter ludwigii	721734	96.37	0.44	Human	Scaffold	ftp://ftp.ncbi.nlm.nih.gov/genomes/all/GCA/019/731/835/GCA_019731835.1_ASM1973183v1
Cluster 1	GCA_019733775.1	Bacteria;Pseudomonadota;Gammaproteobacteria;Enterobacterales;Enterobacteriaceae;Enterobacter;Enterobacter ludwigii	Enterobacter ludwigii	721734	96.18	0.44	Human	Scaffold	ftp://ftp.ncbi.nlm.nih.gov/genomes/all/GCA/019/733/775/GCA_019733775.1_ASM1973377v1
Cluster 1	GCA_019795045.1	Bacteria;Pseudomonadota;Gammaproteobacteria;Enterobacterales;Enterobacteriaceae;Citrobacter;Citrobacter freundii	Citrobacter freundii	421698	99.84	0.73	Human	Scaffold	ftp://ftp.ncbi.nlm.nih.gov/genomes/all/GCA/019/795/045/GCA_019795045.1_ASM1979504v1
Cluster 1	GCA_019803045.1	Bacteria;Pseudomonadota;Gammaproteobacteria;Enterobacterales;Enterobacteriaceae;Citrobacter;Citrobacter farmeri	Citrobacter farmeri	5022624	99	3.61	Human	Completed Genome	ftp://ftp.ncbi.nlm.nih.gov/genomes/all/GCA/019/803/045/GCA_019803045.1_ASM1980304v1
Cluster 1	GCA_019815105.1	Bacteria;Pseudomonadota;Gammaproteobacteria;Enterobacterales;Enterobacteriaceae;Enterobacter;Enterobacter bugandensis	Enterobacter bugandensis	284178	96.08	0.03	Human	Scaffold	ftp://ftp.ncbi.nlm.nih.gov/genomes/all/GCA/019/815/105/GCA_019815105.1_ASM1981510v1
Cluster 1	GCA_019839385.1	Bacteria;Pseudomonadota;Gammaproteobacteria;Enterobacterales;Enterobacteriaceae;Escherichia;Escherichia coli	Escherichia coli	211855	99.97	0.04	Animal	Scaffold	ftp://ftp.ncbi.nlm.nih.gov/genomes/all/GCA/019/839/385/GCA_019839385.1_ASM1983938v1
Cluster 1	GCA_019839425.1	Bacteria;Pseudomonadota;Gammaproteobacteria;Enterobacterales;Enterobacteriaceae;Escherichia;Escherichia coli	Escherichia coli	117788	95.38	0.64	Animal	Scaffold	ftp://ftp.ncbi.nlm.nih.gov/genomes/all/GCA/019/839/425/GCA_019839425.1_ASM1983942v1
Cluster 1	GCA_019840255.1	Bacteria;Pseudomonadota;Gammaproteobacteria;Enterobacterales;Enterobacteriaceae;Escherichia;Escherichia coli	Escherichia coli	159398	95.33	1.05	Animal	Scaffold	ftp://ftp.ncbi.nlm.nih.gov/genomes/all/GCA/019/840/255/GCA_019840255.1_ASM1984025v1
Cluster 1	GCA_019840835.1	Bacteria;Pseudomonadota;Gammaproteobacteria;Enterobacterales;Enterobacteriaceae;Escherichia;Escherichia marmotae	Escherichia marmotae	124214	99.97	0.04	Animal	Scaffold	ftp://ftp.ncbi.nlm.nih.gov/genomes/all/GCA/019/840/835/GCA_019840835.1_ASM1984083v1
Cluster 1	GCA_019846155.1	Bacteria;Pseudomonadota;Gammaproteobacteria;Vibrionales;Vibrionaceae;Vibrio;Vibrio mimicus	Vibrio mimicus	256975	96.39	1.35	Environment	Scaffold	ftp://ftp.ncbi.nlm.nih.gov/genomes/all/GCA/019/846/155/GCA_019846155.1_ASM1984615v1
Cluster 1	GCA_019846235.1	Bacteria;Pseudomonadota;Gammaproteobacteria;Vibrionales;Vibrionaceae;Vibrio;Vibrio alginolyticus	Vibrio alginolyticus	295382	95.99	1.23	Environment	Scaffold	ftp://ftp.ncbi.nlm.nih.gov/genomes/all/GCA/019/846/235/GCA_019846235.1_ASM1984623v1
Cluster 1	GCA_019846405.1	Bacteria;Pseudomonadota;Gammaproteobacteria;Vibrionales;Vibrionaceae;Vibrio;Vibrio alginolyticus	Vibrio alginolyticus	224247	96.19	0.66	Environment	Scaffold	ftp://ftp.ncbi.nlm.nih.gov/genomes/all/GCA/019/846/405/GCA_019846405.1_ASM1984640v1
Cluster 1	GCA_019846755.1	Bacteria;Pseudomonadota;Gammaproteobacteria;Vibrionales;Vibrionaceae;Vibrio;Vibrio vulnificus	Vibrio vulnificus	373765	95.38	0.95	Environment	Scaffold	ftp://ftp.ncbi.nlm.nih.gov/genomes/all/GCA/019/846/755/GCA_019846755.1_ASM1984675v1
Cluster 1	GCA_019846775.1	Bacteria;Pseudomonadota;Gammaproteobacteria;Vibrionales;Vibrionaceae;Vibrio;Vibrio vulnificus	Vibrio vulnificus	383183	95.45	0.95	Environment	Scaffold	ftp://ftp.ncbi.nlm.nih.gov/genomes/all/GCA/019/846/775/GCA_019846775.1_ASM1984677v1
Cluster 1	GCA_019846825.1	Bacteria;Pseudomonadota;Gammaproteobacteria;Vibrionales;Vibrionaceae;Vibrio;Vibrio alginolyticus	Vibrio alginolyticus	743096	99.95	0.65	Environment	Scaffold	ftp://ftp.ncbi.nlm.nih.gov/genomes/all/GCA/019/846/825/GCA_019846825.1_ASM1984682v1
Cluster 1	GCA_019880205.1	Bacteria;Pseudomonadota;Gammaproteobacteria;Enterobacterales;Erwiniaceae;Pantoea;Pantoea alfalfae	Pantoea agglomerans	3973606	99.32	0.56	Enironment	Completed Genome	ftp://ftp.ncbi.nlm.nih.gov/genomes/all/GCA/019/880/205/GCA_019880205.1_ASM1988020v1
Cluster 1	GCA_019890835.1	Bacteria;Pseudomonadota;Gammaproteobacteria;Enterobacterales;Enterobacteriaceae;Escherichia;Escherichia coli	Escherichia coli	4764500	99.53	0.35	Environment	Completed Genome	ftp://ftp.ncbi.nlm.nih.gov/genomes/all/GCA/019/890/835/GCA_019890835.1_ASM1989083v1
Cluster 1	GCA_019891275.1	Bacteria;Pseudomonadota;Gammaproteobacteria;Enterobacterales;Enterobacteriaceae;Escherichia;Escherichia coli	Escherichia coli	131691	95.39	0.51	Enironment	Scaffold	ftp://ftp.ncbi.nlm.nih.gov/genomes/all/GCA/019/891/275/GCA_019891275.1_ASM1989127v1
Cluster 1	GCA_019916005.1	Bacteria;Pseudomonadota;Gammaproteobacteria;Pasteurellales;Pasteurellaceae;Pasteurella;Pasteurella multocida	Pasteurella multocida	2624884	99.55	0	Animal	Completed Genome	ftp://ftp.ncbi.nlm.nih.gov/genomes/all/GCA/019/916/005/GCA_019916005.1_ASM1991600v1
Cluster 1	GCA_019968785.1	Bacteria;Pseudomonadota;Gammaproteobacteria;Enterobacterales;Enterobacteriaceae;Enterobacter;Enterobacter asburiae	Enterobacter asburiae	4671611	99.36	0.03	Environment	Completed Genome	ftp://ftp.ncbi.nlm.nih.gov/genomes/all/GCA/019/968/785/GCA_019968785.1_ASM1996878v1
Cluster 1	GCA_019968865.1	Bacteria;Pseudomonadota;Gammaproteobacteria;Enterobacterales;Enterobacteriaceae;Enterobacter;Enterobacter asburiae	Enterobacter asburiae	4837633	99.97	1.56	Environment	Completed Genome	ftp://ftp.ncbi.nlm.nih.gov/genomes/all/GCA/019/968/865/GCA_019968865.1_ASM1996886v1
Cluster 1	GCA_019973675.1	Bacteria;Pseudomonadota;Gammaproteobacteria;Pasteurellales;Pasteurellaceae;Haemophilus;Haemophilus haemolyticus	Haemophilus haemolyticus	1895310	96.35	1.5	Human	Completed Genome	ftp://ftp.ncbi.nlm.nih.gov/genomes/all/GCA/019/973/675/GCA_019973675.1_ASM1997367v1
Cluster 1	GCA_020103245.1	Bacteria;Pseudomonadota;Gammaproteobacteria;Vibrionales;Vibrionaceae;Vibrio;Vibrio metschnikovii	Vibrio metschnikovii	251616	98.51	0.63	Animal	Scaffold	ftp://ftp.ncbi.nlm.nih.gov/genomes/all/GCA/020/103/245/GCA_020103245.1_ASM2010324v1
Cluster 1	GCA_020143325.1	Bacteria;Pseudomonadota;Gammaproteobacteria;Enterobacterales;Enterobacteriaceae;Escherichia;Escherichia coli	Escherichia coli	112329	99.97	0.16	Animal	Scaffold	ftp://ftp.ncbi.nlm.nih.gov/genomes/all/GCA/020/143/325/GCA_020143325.1_ASM2014332v1
Cluster 1	GCA_020144385.1	Bacteria;Pseudomonadota;Gammaproteobacteria;Enterobacterales;Enterobacteriaceae;Escherichia;Escherichia coli	Escherichia coli	259382	99.97	0.04	Animal	Scaffold	ftp://ftp.ncbi.nlm.nih.gov/genomes/all/GCA/020/144/385/GCA_020144385.1_ASM2014438v1
Cluster 1	GCA_020145145.1	Bacteria;Pseudomonadota;Gammaproteobacteria;Enterobacterales;Enterobacteriaceae;Escherichia;Escherichia coli	Escherichia coli	335047	99.93	0.1	Animal	Scaffold	ftp://ftp.ncbi.nlm.nih.gov/genomes/all/GCA/020/145/145/GCA_020145145.1_ASM2014514v1
Cluster 1	GCA_020145365.1	Bacteria;Pseudomonadota;Gammaproteobacteria;Enterobacterales;Enterobacteriaceae;Escherichia;Escherichia coli	Escherichia coli	85266	99.97	0.09	Animal	Scaffold	ftp://ftp.ncbi.nlm.nih.gov/genomes/all/GCA/020/145/365/GCA_020145365.1_ASM2014536v1
Cluster 1	GCA_020145625.1	Bacteria;Pseudomonadota;Gammaproteobacteria;Enterobacterales;Enterobacteriaceae;Escherichia;Escherichia coli	Escherichia coli	118031	100	0.11	Animal	Scaffold	ftp://ftp.ncbi.nlm.nih.gov/genomes/all/GCA/020/145/625/GCA_020145625.1_ASM2014562v1
Cluster 1	GCA_020145685.1	Bacteria;Pseudomonadota;Gammaproteobacteria;Enterobacterales;Enterobacteriaceae;Escherichia;Escherichia coli	Escherichia coli	159489	100	0.59	Animal	Scaffold	ftp://ftp.ncbi.nlm.nih.gov/genomes/all/GCA/020/145/685/GCA_020145685.1_ASM2014568v1
Cluster 1	GCA_020149765.1	Bacteria;Pseudomonadota;Gammaproteobacteria;Enterobacterales;Erwiniaceae;Pantoea;Pantoea agglomerans	Pantoea agglomerans	4087626	97.89	1.64	Enironment	Completed Genome	ftp://ftp.ncbi.nlm.nih.gov/genomes/all/GCA/020/149/765/GCA_020149765.1_ASM2014976v1
Cluster 1	GCA_020162255.1	Bacteria;Pseudomonadota;Gammaproteobacteria;Aeromonadales;Aeromonadaceae;Aeromonas;Aeromonas hydrophila	Aeromonas hydrophila	4846911	98.07	2.32	Environment	Completed Genome	ftp://ftp.ncbi.nlm.nih.gov/genomes/all/GCA/020/162/255/GCA_020162255.1_ASM2016225v1
Cluster 1	GCA_020405305.1	Bacteria;Pseudomonadota;Gammaproteobacteria;Aeromonadales;Aeromonadaceae;Aeromonas;Aeromonas dhakensis	Aeromonas dhakensis	4907981	99.96	0.45	Human	Completed Genome	ftp://ftp.ncbi.nlm.nih.gov/genomes/all/GCA/020/405/305/GCA_020405305.1_ASM2040530v1
Cluster 1	GCA_020405325.1	Bacteria;Pseudomonadota;Gammaproteobacteria;Aeromonadales;Aeromonadaceae;Aeromonas;Aeromonas caviae	Aeromonas caviae	4444683	100	0.65	Human	Completed Genome	ftp://ftp.ncbi.nlm.nih.gov/genomes/all/GCA/020/405/325/GCA_020405325.1_ASM2040532v1
Cluster 1	GCA_020405345.1	Bacteria;Pseudomonadota;Gammaproteobacteria;Aeromonadales;Aeromonadaceae;Aeromonas;Aeromonas dhakensis	Aeromonas dhakensis	4771925	99.96	0.13	Human	Completed Genome	ftp://ftp.ncbi.nlm.nih.gov/genomes/all/GCA/020/405/345/GCA_020405345.1_ASM2040534v1
Cluster 1	GCA_020405365.1	Bacteria;Pseudomonadota;Gammaproteobacteria;Aeromonadales;Aeromonadaceae;Aeromonas;Aeromonas hydrophila	Aeromonas hydrophila	4793727	97.82	2.01	Human	Completed Genome	ftp://ftp.ncbi.nlm.nih.gov/genomes/all/GCA/020/405/365/GCA_020405365.1_ASM2040536v1
Cluster 1	GCA_020405385.1	Bacteria;Pseudomonadota;Gammaproteobacteria;Aeromonadales;Aeromonadaceae;Aeromonas;Aeromonas hydrophila	Aeromonas hydrophila	4695915	98.62	1.75	Human	Completed Genome	ftp://ftp.ncbi.nlm.nih.gov/genomes/all/GCA/020/405/385/GCA_020405385.1_ASM2040538v1
Cluster 1	GCA_020423125.1	Bacteria;Pseudomonadota;Gammaproteobacteria;Aeromonadales;Aeromonadaceae;Aeromonas;Aeromonas media	Aeromonas media	4521851	99.18	0.4	Environment	Completed Genome	ftp://ftp.ncbi.nlm.nih.gov/genomes/all/GCA/020/423/125/GCA_020423125.1_ASM2042312v1
Cluster 1	GCA_020494085.1	Bacteria;Pseudomonadota;Gammaproteobacteria;Enterobacterales;Enterobacteriaceae;Enterobacter;Enterobacter mori	Enterobacter mori	4818618	99.51	0.03	Environment	Completed Genome	ftp://ftp.ncbi.nlm.nih.gov/genomes/all/GCA/020/494/085/GCA_020494085.1_ASM2049408v1
Cluster 1	GCA_020525985.1	Bacteria;Pseudomonadota;Gammaproteobacteria;Enterobacterales;Enterobacteriaceae;Klebsiella;Klebsiella pneumoniae	Klebsiella pneumoniae	5336167	97.04	2.85	Environment	Completed Genome	ftp://ftp.ncbi.nlm.nih.gov/genomes/all/GCA/020/525/985/GCA_020525985.1_ASM2052598v1
Cluster 1	GCA_020540925.1	Bacteria;Pseudomonadota;Gammaproteobacteria;Enterobacterales;Enterobacteriaceae;Enterobacter;Enterobacter cloacae	Enterobacter cloacae	4918254	98.88	0.79	Human	Completed Genome	ftp://ftp.ncbi.nlm.nih.gov/genomes/all/GCA/020/540/925/GCA_020540925.1_ASM2054092v1
Cluster 1	GCA_020544445.1	Bacteria;Pseudomonadota;Gammaproteobacteria;Aeromonadales;Aeromonadaceae;Aeromonas;Aeromonas veronii	Aeromonas veronii	5016477	98.33	4.18	Environment	Completed Genome	ftp://ftp.ncbi.nlm.nih.gov/genomes/all/GCA/020/544/445/GCA_020544445.1_ASM2054444v1
Cluster 1	GCA_020576875.1	Bacteria;Pseudomonadota;Gammaproteobacteria;Enterobacterales;Enterobacteriaceae;Klebsiella;Klebsiella pneumoniae	Klebsiella pneumoniae	210782	95.98	1.26	Human	Scaffold	ftp://ftp.ncbi.nlm.nih.gov/genomes/all/GCA/020/576/875/GCA_020576875.1_ASM2057687v1
Cluster 1	GCA_020640955.1	Bacteria;Pseudomonadota;Gammaproteobacteria;Aeromonadales;Aeromonadaceae;Aeromonas;Aeromonas veronii	Aeromonas veronii	4661511	97.8	3.37	Human	Completed Genome	ftp://ftp.ncbi.nlm.nih.gov/genomes/all/GCA/020/640/955/GCA_020640955.1_ASM2064095v1
Cluster 1	GCA_020640975.1	Bacteria;Pseudomonadota;Gammaproteobacteria;Aeromonadales;Aeromonadaceae;Aeromonas;Aeromonas caviae	Aeromonas caviae	4600517	98.78	0.73	Human	Completed Genome	ftp://ftp.ncbi.nlm.nih.gov/genomes/all/GCA/020/640/975/GCA_020640975.1_ASM2064097v1
Cluster 1	GCA_020683225.1	Bacteria;Pseudomonadota;Gammaproteobacteria;Enterobacterales;Enterobacteriaceae;Citrobacter;Citrobacter freundii	Citrobacter freundii	5153556	99.87	0.5	Animal	Completed Genome	ftp://ftp.ncbi.nlm.nih.gov/genomes/all/GCA/020/683/225/GCA_020683225.1_ASM2068322v1
Cluster 1	GCA_020732515.1	Bacteria;Pseudomonadota;Gammaproteobacteria;Enterobacterales;Enterobacteriaceae;Escherichia;Escherichia coli	Escherichia coli	223723	95.04	0.29	Environment	Scaffold	ftp://ftp.ncbi.nlm.nih.gov/genomes/all/GCA/020/732/515/GCA_020732515.1_ASM2073251v1
Cluster 1	GCA_020783215.1	Bacteria;Pseudomonadota;Gammaproteobacteria;Enterobacterales;Enterobacteriaceae;Enterobacter;Enterobacter ludwigii	Enterobacter ludwigii	4763253	99.52	0.03	Human	Completed Genome	ftp://ftp.ncbi.nlm.nih.gov/genomes/all/GCA/020/783/215/GCA_020783215.1_ASM2078321v1
Cluster 1	GCA_020783495.1	Bacteria;Pseudomonadota;Gammaproteobacteria;Enterobacterales;Erwiniaceae;Pantoea;Pantoea agglomerans	Pantoea agglomerans	4089578	98.65	1	Enironment	Completed Genome	ftp://ftp.ncbi.nlm.nih.gov/genomes/all/GCA/020/783/495/GCA_020783495.1_ASM2078349v1
Cluster 1	GCA_020882135.1	Bacteria;Pseudomonadota;Gammaproteobacteria;Enterobacterales;Enterobacteriaceae;Enterobacter;Enterobacter cloacae	Enterobacter cloacae	4961034	98.68	1.16	Environment	Completed Genome	ftp://ftp.ncbi.nlm.nih.gov/genomes/all/GCA/020/882/135/GCA_020882135.1_ASM2088213v1
Cluster 1	GCA_020883735.1	Bacteria;Pseudomonadota;Gammaproteobacteria;Enterobacterales;Yersiniaceae;Serratia;Serratia marcescens	Serratia marcescens	153559	99.86	0	Human	Scaffold	ftp://ftp.ncbi.nlm.nih.gov/genomes/all/GCA/020/883/735/GCA_020883735.1_ASM2088373v1
Cluster 1	GCA_020883795.1	Bacteria;Pseudomonadota;Gammaproteobacteria;Enterobacterales;Yersiniaceae;Serratia;Serratia marcescens	Serratia marcescens	195304	99.88	0	Human	Scaffold	ftp://ftp.ncbi.nlm.nih.gov/genomes/all/GCA/020/883/795/GCA_020883795.1_ASM2088379v1
Cluster 1	GCA_020883815.1	Bacteria;Pseudomonadota;Gammaproteobacteria;Enterobacterales;Yersiniaceae;Serratia;Serratia marcescens	Serratia marcescens	139613	99.81	0	Human	Scaffold	ftp://ftp.ncbi.nlm.nih.gov/genomes/all/GCA/020/883/815/GCA_020883815.1_ASM2088381v1
Cluster 1	GCA_020884535.1	Bacteria;Pseudomonadota;Gammaproteobacteria;Enterobacterales;Yersiniaceae;Serratia;Serratia marcescens	Serratia marcescens	132589	99.59	0	Human	Scaffold	ftp://ftp.ncbi.nlm.nih.gov/genomes/all/GCA/020/884/535/GCA_020884535.1_ASM2088453v1
Cluster 1	GCA_020886355.1	Bacteria;Pseudomonadota;Gammaproteobacteria;Enterobacterales;Yersiniaceae;Serratia;Serratia marcescens	Serratia marcescens	169290	99.86	0	Human	Scaffold	ftp://ftp.ncbi.nlm.nih.gov/genomes/all/GCA/020/886/355/GCA_020886355.1_ASM2088635v1
Cluster 1	GCA_020886455.1	Bacteria;Pseudomonadota;Gammaproteobacteria;Enterobacterales;Yersiniaceae;Serratia;Serratia marcescens	Serratia marcescens	213959	99.86	0	Human	Scaffold	ftp://ftp.ncbi.nlm.nih.gov/genomes/all/GCA/020/886/455/GCA_020886455.1_ASM2088645v1
Cluster 1	GCA_020886495.2	Bacteria;Pseudomonadota;Gammaproteobacteria;Enterobacterales;Enterobacteriaceae;Escherichia;Escherichia coli	Escherichia coli	4702923	99.56	0.91	Human	Completed Genome	ftp://ftp.ncbi.nlm.nih.gov/genomes/all/GCA/020/886/495/GCA_020886495.2_ASM2088649v2
Cluster 1	GCA_020886595.1	Bacteria;Pseudomonadota;Gammaproteobacteria;Enterobacterales;Yersiniaceae;Serratia;Serratia marcescens	Serratia marcescens	139658	99.81	0	Human	Scaffold	ftp://ftp.ncbi.nlm.nih.gov/genomes/all/GCA/020/886/595/GCA_020886595.1_ASM2088659v1
Cluster 1	GCA_020886815.1	Bacteria;Pseudomonadota;Gammaproteobacteria;Enterobacterales;Yersiniaceae;Serratia;Serratia marcescens	Serratia marcescens	120998	99.86	0	Human	Scaffold	ftp://ftp.ncbi.nlm.nih.gov/genomes/all/GCA/020/886/815/GCA_020886815.1_ASM2088681v1
Cluster 1	GCA_020887465.1	Bacteria;Pseudomonadota;Gammaproteobacteria;Enterobacterales;Yersiniaceae;Serratia;Serratia marcescens	Serratia marcescens	176143	99.81	0.45	Human	Scaffold	ftp://ftp.ncbi.nlm.nih.gov/genomes/all/GCA/020/887/465/GCA_020887465.1_ASM2088746v1
Cluster 1	GCA_020887805.1	Bacteria;Pseudomonadota;Gammaproteobacteria;Enterobacterales;Yersiniaceae;Serratia;Serratia marcescens	Serratia marcescens	159582	99.86	0.61	Human	Scaffold	ftp://ftp.ncbi.nlm.nih.gov/genomes/all/GCA/020/887/805/GCA_020887805.1_ASM2088780v1
Cluster 1	GCA_020887825.1	Bacteria;Pseudomonadota;Gammaproteobacteria;Enterobacterales;Yersiniaceae;Serratia;Serratia marcescens	Serratia marcescens	243288	99.81	0	Human	Scaffold	ftp://ftp.ncbi.nlm.nih.gov/genomes/all/GCA/020/887/825/GCA_020887825.1_ASM2088782v1
Cluster 1	GCA_020982565.1	Bacteria;Pseudomonadota;Gammaproteobacteria;Enterobacterales;Enterobacteriaceae;Klebsiella;Klebsiella aerogenes	Klebsiella aerogenes	203175	95.06	2.89	Human	Scaffold	ftp://ftp.ncbi.nlm.nih.gov/genomes/all/GCA/020/982/565/GCA_020982565.1_ASM2098256v1
Cluster 1	GCA_020991025.1	Bacteria;Pseudomonadota;Gammaproteobacteria;Enterobacterales;Enterobacteriaceae;Plesiomonas;Plesiomonas shigelloides	Plesiomonas shigelloides	3555866	100	0	Environment	Completed Genome	ftp://ftp.ncbi.nlm.nih.gov/genomes/all/GCA/020/991/025/GCA_020991025.1_ASM2099102v1
Cluster 1	GCA_021165625.1	Bacteria;Pseudomonadota;Gammaproteobacteria;Aeromonadales;Aeromonadaceae;Aeromonas;Aeromonas veronii	Aeromonas veronii	178553	96.14	4.29	Animal	Scaffold	ftp://ftp.ncbi.nlm.nih.gov/genomes/all/GCA/021/165/625/GCA_021165625.1_ASM2116562v1
Cluster 1	GCA_021249365.1	Bacteria;Pseudomonadota;Gammaproteobacteria;Vibrionales;Vibrionaceae;Vibrio;Vibrio furnissii	Vibrio furnissii	3404211	99.8	1.91	Environment	Completed Genome	ftp://ftp.ncbi.nlm.nih.gov/genomes/all/GCA/021/249/365/GCA_021249365.1_ASM2124936v1
Cluster 1	GCA_021308775.1	Bacteria;Pseudomonadota;Gammaproteobacteria;Vibrionales;Vibrionaceae;Vibrio;Vibrio cholerae	Vibrio cholerae	257822	100	1.18	Human	Scaffold	ftp://ftp.ncbi.nlm.nih.gov/genomes/all/GCA/021/308/775/GCA_021308775.1_ASM2130877v1
Cluster 1	GCA_021342175.1	Bacteria;Pseudomonadota;Gammaproteobacteria;Enterobacterales;Enterobacteriaceae;Escherichia;Escherichia coli	Escherichia coli	160190	95.78	0.96	Human	Scaffold	ftp://ftp.ncbi.nlm.nih.gov/genomes/all/GCA/021/342/175/GCA_021342175.1_ASM2134217v1
Cluster 1	GCA_021347605.1	Bacteria;Pseudomonadota;Gammaproteobacteria;Enterobacterales;Enterobacteriaceae;Enterobacter;Enterobacter roggenkampii	Enterobacter roggenkampii	4684108	99.5	0.17	Environment	Completed Genome	ftp://ftp.ncbi.nlm.nih.gov/genomes/all/GCA/021/347/605/GCA_021347605.1_ASM2134760v1
Cluster 1	GCA_021416125.1	Bacteria;Pseudomonadota;Gammaproteobacteria;Enterobacterales;Enterobacteriaceae;Klebsiella;Klebsiella aerogenes	Klebsiella aerogenes	159966	100	0.44	Human	Scaffold	ftp://ftp.ncbi.nlm.nih.gov/genomes/all/GCA/021/416/125/GCA_021416125.1_ASM2141612v1
Cluster 1	GCA_021416855.1	Bacteria;Pseudomonadota;Gammaproteobacteria;Enterobacterales;Enterobacteriaceae;Enterobacter;Enterobacter quasiroggenkampii	Enterobacter quasiroggenkampii	2557782	96.49	0.03	Human	Scaffold	ftp://ftp.ncbi.nlm.nih.gov/genomes/all/GCA/021/416/855/GCA_021416855.1_ASM2141685v1
Cluster 1	GCA_021416865.1	Bacteria;Pseudomonadota;Gammaproteobacteria;Enterobacterales;Enterobacteriaceae;Enterobacter;Enterobacter asburiae	Enterobacter asburiae	256634	99.97	0.76	Human	Scaffold	ftp://ftp.ncbi.nlm.nih.gov/genomes/all/GCA/021/416/865/GCA_021416865.1_ASM2141686v1
Cluster 1	GCA_021416905.1	Bacteria;Pseudomonadota;Gammaproteobacteria;Enterobacterales;Enterobacteriaceae;Enterobacter;Enterobacter roggenkampii	Enterobacter roggenkampii	252360	99.07	0.26	Human	Scaffold	ftp://ftp.ncbi.nlm.nih.gov/genomes/all/GCA/021/416/905/GCA_021416905.1_ASM2141690v1
Cluster 1	GCA_021431945.1	Bacteria;Pseudomonadota;Gammaproteobacteria;Vibrionales;Vibrionaceae;Vibrio;Vibrio cholerae	Vibrio cholerae	3079090	99.34	1.12	Animal	Completed Genome	ftp://ftp.ncbi.nlm.nih.gov/genomes/all/GCA/021/431/945/GCA_021431945.1_ASM2143194v1
Cluster 1	GCA_021440565.1	Bacteria;Pseudomonadota;Gammaproteobacteria;Enterobacterales;Enterobacteriaceae;Enterobacter;Enterobacter hormaechei	Enterobacter hormaechei	83243	99.37	0.82	Animal	Scaffold	ftp://ftp.ncbi.nlm.nih.gov/genomes/all/GCA/021/440/565/GCA_021440565.1_ASM2144056v1
Cluster 1	GCA_021441965.1	Bacteria;Pseudomonadota;Gammaproteobacteria;Enterobacterales;Enterobacteriaceae;Escherichia;Escherichia coli	Escherichia coli	4578540	97.68	0.55	Animal	Completed Genome	ftp://ftp.ncbi.nlm.nih.gov/genomes/all/GCA/021/441/965/GCA_021441965.1_ASM2144196v1
Cluster 1	GCA_021484785.1	Bacteria;Pseudomonadota;Gammaproteobacteria;Enterobacterales;Enterobacteriaceae;Escherichia;Escherichia coli	Escherichia coli	4417652	98.86	0.27	Animal	Completed Genome	ftp://ftp.ncbi.nlm.nih.gov/genomes/all/GCA/021/484/785/GCA_021484785.1_ASM2148478v1
Cluster 1	GCA_021498225.1	Bacteria;Pseudomonadota;Gammaproteobacteria;Enterobacterales;Yersiniaceae;Serratia;Serratia rubidaea	Serratia rubidaea	4952534	99.73	0.68	Enironment	Completed Genome	ftp://ftp.ncbi.nlm.nih.gov/genomes/all/GCA/021/498/225/GCA_021498225.1_ASM2149822v1
Cluster 1	GCA_021586915.1	Bacteria;Pseudomonadota;Gammaproteobacteria;Aeromonadales;Aeromonadaceae;Aeromonas;Aeromonas veronii	Aeromonas veronii	4526256	98.29	1.44	Human	Completed Genome	ftp://ftp.ncbi.nlm.nih.gov/genomes/all/GCA/021/586/915/GCA_021586915.1_ASM2158691v1
Cluster 1	GCA_021890295.1	Bacteria;Pseudomonadota;Gammaproteobacteria;Vibrionales;Vibrionaceae;Vibrio;Vibrio parahaemolyticus	Vibrio parahaemolyticus	912595	96.14	0.71	Animal	Scaffold	ftp://ftp.ncbi.nlm.nih.gov/genomes/all/GCA/021/890/295/GCA_021890295.1_ASM2189029v1
Cluster 1	GCA_021890335.1	Bacteria;Pseudomonadota;Gammaproteobacteria;Vibrionales;Vibrionaceae;Vibrio;Vibrio parahaemolyticus	Vibrio parahaemolyticus	329323	96.51	1	Animal	Scaffold	ftp://ftp.ncbi.nlm.nih.gov/genomes/all/GCA/021/890/335/GCA_021890335.1_ASM2189033v1
Cluster 1	GCA_021890355.1	Bacteria;Pseudomonadota;Gammaproteobacteria;Vibrionales;Vibrionaceae;Vibrio;Vibrio parahaemolyticus	Vibrio parahaemolyticus	402855	96	0.67	Animal	Scaffold	ftp://ftp.ncbi.nlm.nih.gov/genomes/all/GCA/021/890/355/GCA_021890355.1_ASM2189035v1
Cluster 1	GCA_021890375.1	Bacteria;Pseudomonadota;Gammaproteobacteria;Vibrionales;Vibrionaceae;Vibrio;Vibrio parahaemolyticus	Vibrio parahaemolyticus	314969	95.83	0.96	Animal	Scaffold	ftp://ftp.ncbi.nlm.nih.gov/genomes/all/GCA/021/890/375/GCA_021890375.1_ASM2189037v1
Cluster 1	GCA_021890385.1	Bacteria;Pseudomonadota;Gammaproteobacteria;Vibrionales;Vibrionaceae;Vibrio;Vibrio parahaemolyticus	Vibrio parahaemolyticus	508421	96.26	0.63	Animal	Scaffold	ftp://ftp.ncbi.nlm.nih.gov/genomes/all/GCA/021/890/385/GCA_021890385.1_ASM2189038v1
Cluster 1	GCA_022014715.1	Bacteria;Pseudomonadota;Gammaproteobacteria;Enterobacterales;Enterobacteriaceae;Enterobacter;Enterobacter mori	Enterobacter mori	4740236	99.61	0.3	Environment	Completed Genome	ftp://ftp.ncbi.nlm.nih.gov/genomes/all/GCA/022/014/715/GCA_022014715.1_ASM2201471v1
Cluster 1	GCA_022289115.1	Bacteria;Pseudomonadota;Gammaproteobacteria;Vibrionales;Vibrionaceae;Vibrio;Vibrio furnissii	Vibrio furnissii	153897	95.46	2.07	Human	Scaffold	ftp://ftp.ncbi.nlm.nih.gov/genomes/all/GCA/022/289/115/GCA_022289115.1_ASM2228911v1
Cluster 1	GCA_022289145.1	Bacteria;Pseudomonadota;Gammaproteobacteria;Vibrionales;Vibrionaceae;Vibrio;Vibrio furnissii	Vibrio furnissii	173950	96.37	1.76	Human	Scaffold	ftp://ftp.ncbi.nlm.nih.gov/genomes/all/GCA/022/289/145/GCA_022289145.1_ASM2228914v1
Cluster 1	GCA_022289185.1	Bacteria;Pseudomonadota;Gammaproteobacteria;Vibrionales;Vibrionaceae;Vibrio;Vibrio furnissii	Vibrio furnissii	162427	95.64	1.21	Human	Scaffold	ftp://ftp.ncbi.nlm.nih.gov/genomes/all/GCA/022/289/185/GCA_022289185.1_ASM2228918v1
Cluster 1	GCA_022289365.1	Bacteria;Pseudomonadota;Gammaproteobacteria;Vibrionales;Vibrionaceae;Vibrio;Vibrio furnissii	Vibrio furnissii	171400	96.24	2.11	Environment	Scaffold	ftp://ftp.ncbi.nlm.nih.gov/genomes/all/GCA/022/289/365/GCA_022289365.1_ASM2228936v1
Cluster 1	GCA_022289695.1	Bacteria;Pseudomonadota;Gammaproteobacteria;Vibrionales;Vibrionaceae;Vibrio;Vibrio alginolyticus	Vibrio alginolyticus	168992	95.75	1.12	Environment	Scaffold	ftp://ftp.ncbi.nlm.nih.gov/genomes/all/GCA/022/289/695/GCA_022289695.1_ASM2228969v1
Cluster 1	GCA_022289715.1	Bacteria;Pseudomonadota;Gammaproteobacteria;Vibrionales;Vibrionaceae;Vibrio;Vibrio alginolyticus	Vibrio alginolyticus	148819	98.89	0.29	Environment	Scaffold	ftp://ftp.ncbi.nlm.nih.gov/genomes/all/GCA/022/289/715/GCA_022289715.1_ASM2228971v1
Cluster 1	GCA_022289815.1	Bacteria;Pseudomonadota;Gammaproteobacteria;Vibrionales;Vibrionaceae;Vibrio;Vibrio alginolyticus	Vibrio alginolyticus	176232	95.99	1.53	Environment	Scaffold	ftp://ftp.ncbi.nlm.nih.gov/genomes/all/GCA/022/289/815/GCA_022289815.1_ASM2228981v1
Cluster 1	GCA_022290755.1	Bacteria;Pseudomonadota;Gammaproteobacteria;Vibrionales;Vibrionaceae;Vibrio;Vibrio parahaemolyticus	Vibrio parahaemolyticus	152552	95.33	2.79	Environment	Scaffold	ftp://ftp.ncbi.nlm.nih.gov/genomes/all/GCA/022/290/755/GCA_022290755.1_ASM2229075v1
Cluster 1	GCA_022343125.1	Bacteria;Pseudomonadota;Gammaproteobacteria;Vibrionales;Vibrionaceae;Vibrio;Vibrio alginolyticus	Vibrio alginolyticus	3342267	99.6	1.02	Environment	Completed Genome	ftp://ftp.ncbi.nlm.nih.gov/genomes/all/GCA/022/343/125/GCA_022343125.1_ASM2234312v1
Cluster 1	GCA_022343145.1	Bacteria;Pseudomonadota;Gammaproteobacteria;Vibrionales;Vibrionaceae;Vibrio;Vibrio alginolyticus	Vibrio alginolyticus	3329458	99.2	1.24	Environment	Completed Genome	ftp://ftp.ncbi.nlm.nih.gov/genomes/all/GCA/022/343/145/GCA_022343145.1_ASM2234314v1
Cluster 1	GCA_022343165.1	Bacteria;Pseudomonadota;Gammaproteobacteria;Vibrionales;Vibrionaceae;Vibrio;Vibrio alginolyticus	Vibrio alginolyticus	3294198	99.42	1.46	Environment	Completed Genome	ftp://ftp.ncbi.nlm.nih.gov/genomes/all/GCA/022/343/165/GCA_022343165.1_ASM2234316v1
Cluster 1	GCA_022343185.1	Bacteria;Pseudomonadota;Gammaproteobacteria;Vibrionales;Vibrionaceae;Vibrio;Vibrio alginolyticus	Vibrio alginolyticus	3396607	99.6	1.13	Environment	Completed Genome	ftp://ftp.ncbi.nlm.nih.gov/genomes/all/GCA/022/343/185/GCA_022343185.1_ASM2234318v1
Cluster 1	GCA_022343205.1	Bacteria;Pseudomonadota;Gammaproteobacteria;Vibrionales;Vibrionaceae;Vibrio;Vibrio alginolyticus	Vibrio alginolyticus	3352833	99.09	1.4	Environment	Completed Genome	ftp://ftp.ncbi.nlm.nih.gov/genomes/all/GCA/022/343/205/GCA_022343205.1_ASM2234320v1
Cluster 1	GCA_022343635.1	Bacteria;Pseudomonadota;Gammaproteobacteria;Enterobacterales;Enterobacteriaceae;Citrobacter;Citrobacter freundii	Citrobacter freundii	355426	96.79	2.84	Environment	Scaffold	ftp://ftp.ncbi.nlm.nih.gov/genomes/all/GCA/022/343/635/GCA_022343635.1_ASM2234363v1
Cluster 1	GCA_022343945.1	Bacteria;Pseudomonadota;Gammaproteobacteria;Aeromonadales;Aeromonadaceae;Aeromonas;Aeromonas caviae	Aeromonas caviae	4783384	99.27	1.23	Human	Completed Genome	ftp://ftp.ncbi.nlm.nih.gov/genomes/all/GCA/022/343/945/GCA_022343945.1_ASM2234394v1
Cluster 1	GCA_022359535.1	Bacteria;Pseudomonadota;Gammaproteobacteria;Enterobacterales;Enterobacteriaceae;Escherichia;Escherichia coli	Escherichia coli	140744	97.97	0.74	Human	Scaffold	ftp://ftp.ncbi.nlm.nih.gov/genomes/all/GCA/022/359/535/GCA_022359535.1_ASM2235953v1
Cluster 1	GCA_022369415.1	Bacteria;Pseudomonadota;Gammaproteobacteria;Enterobacterales;Morganellaceae;Morganella;Morganella morganii	Morganella morganii	4004703	100	0	Animal	Completed Genome	ftp://ftp.ncbi.nlm.nih.gov/genomes/all/GCA/022/369/415/GCA_022369415.1_ASM2236941v1
Cluster 1	GCA_022397635.1	Bacteria;Pseudomonadota;Gammaproteobacteria;Vibrionales;Vibrionaceae;Vibrio;Vibrio parahaemolyticus	Vibrio parahaemolyticus	83036	97.92	1.26	Animal	Scaffold	ftp://ftp.ncbi.nlm.nih.gov/genomes/all/GCA/022/397/635/GCA_022397635.1_ASM2239763v1
Cluster 1	GCA_022398375.1	Bacteria;Pseudomonadota;Gammaproteobacteria;Vibrionales;Vibrionaceae;Vibrio;Vibrio alginolyticus	Vibrio alginolyticus	392826	96.18	0.5	Animal	Scaffold	ftp://ftp.ncbi.nlm.nih.gov/genomes/all/GCA/022/398/375/GCA_022398375.1_ASM2239837v1
Cluster 1	GCA_022409635.1	Bacteria;Pseudomonadota;Gammaproteobacteria;Vibrionales;Vibrionaceae;Vibrio;Vibrio vulnificus	Vibrio vulnificus	466731	96.27	3.39	Animal	Scaffold	ftp://ftp.ncbi.nlm.nih.gov/genomes/all/GCA/022/409/635/GCA_022409635.1_ASM2240963v1
Cluster 1	GCA_022493235.1	Bacteria;Pseudomonadota;Gammaproteobacteria;Enterobacterales;Enterobacteriaceae;Escherichia;Escherichia coli	Escherichia coli	4979481	97.63	0.25	Animal	Completed Genome	ftp://ftp.ncbi.nlm.nih.gov/genomes/all/GCA/022/493/235/GCA_022493235.1_ASM2249323v1
Cluster 1	GCA_022493315.1	Bacteria;Pseudomonadota;Gammaproteobacteria;Enterobacterales;Enterobacteriaceae;Escherichia;Escherichia coli	Escherichia coli	5005265	98.94	0.28	Animal	Completed Genome	ftp://ftp.ncbi.nlm.nih.gov/genomes/all/GCA/022/493/315/GCA_022493315.1_ASM2249331v1
Cluster 1	GCA_022548595.1	Bacteria;Pseudomonadota;Gammaproteobacteria;Enterobacterales;Enterobacteriaceae;Escherichia;Escherichia coli	Escherichia coli	147335	95.77	1.49	Animal	Scaffold	ftp://ftp.ncbi.nlm.nih.gov/genomes/all/GCA/022/548/595/GCA_022548595.1_ASM2254859v1
Cluster 1	GCA_022553555.1	Bacteria;Pseudomonadota;Gammaproteobacteria;Enterobacterales;Enterobacteriaceae;Enterobacter;Enterobacter bugandensis	Enterobacter bugandensis	81245	99.36	0.73	Human	Scaffold	ftp://ftp.ncbi.nlm.nih.gov/genomes/all/GCA/022/553/555/GCA_022553555.1_ASM2255355v1
Cluster 1	GCA_022557195.1	Bacteria;Pseudomonadota;Gammaproteobacteria;Aeromonadales;Aeromonadaceae;Aeromonas;Aeromonas hydrophila	Aeromonas hydrophila	5023649	97.69	1.26	Animal	Completed Genome	ftp://ftp.ncbi.nlm.nih.gov/genomes/all/GCA/022/557/195/GCA_022557195.1_ASM2255719v1
Cluster 1	GCA_022585235.1	Bacteria;Pseudomonadota;Gammaproteobacteria;Enterobacterales;Erwiniaceae;Pantoea;Pantoea agglomerans	Pantoea agglomerans	255269	96.37	2.19	Enironment	Scaffold	ftp://ftp.ncbi.nlm.nih.gov/genomes/all/GCA/022/585/235/GCA_022585235.1_ASM2258523v1
Cluster 1	GCA_022637295.1	Bacteria;Pseudomonadota;Gammaproteobacteria;Pasteurellales;Pasteurellaceae;Pasteurella;Pasteurella multocida	Pasteurella multocida	2438952	99.55	0	Animal	Completed Genome	ftp://ftp.ncbi.nlm.nih.gov/genomes/all/GCA/022/637/295/GCA_022637295.1_ASM2263729v1
Cluster 1	GCA_022637355.1	Bacteria;Pseudomonadota;Gammaproteobacteria;Enterobacterales;Yersiniaceae;Serratia;Serratia plymuthica	Serratia plymuthica	5582777	95.17	2.34	Environment	Completed Genome	ftp://ftp.ncbi.nlm.nih.gov/genomes/all/GCA/022/637/355/GCA_022637355.1_ASM2263735v1
Cluster 1	GCA_022646275.1	Bacteria;Pseudomonadota;Gammaproteobacteria;Enterobacterales;Enterobacteriaceae;Citrobacter;Citrobacter freundii	Citrobacter freundii	4947352	97.79	2.88	Human	Completed Genome	ftp://ftp.ncbi.nlm.nih.gov/genomes/all/GCA/022/646/275/GCA_022646275.1_ASM2264627v1
Cluster 1	GCA_022696625.1	Bacteria;Pseudomonadota;Gammaproteobacteria;Enterobacterales;Enterobacteriaceae;Escherichia;Escherichia coli	Escherichia coli	82198	99.97	0.25	Animal	Scaffold	ftp://ftp.ncbi.nlm.nih.gov/genomes/all/GCA/022/696/625/GCA_022696625.1_ASM2269662v1
Cluster 1	GCA_022700835.1	Bacteria;Pseudomonadota;Gammaproteobacteria;Aeromonadales;Aeromonadaceae;Aeromonas;Aeromonas hydrophila	Aeromonas hydrophila	4814081	98.68	1.64	Animal	Completed Genome	ftp://ftp.ncbi.nlm.nih.gov/genomes/all/GCA/022/700/835/GCA_022700835.1_ASM2270083v1
Cluster 1	GCA_022759545.1	Bacteria;Pseudomonadota;Gammaproteobacteria;Aeromonadales;Aeromonadaceae;Aeromonas;Aeromonas hydrophila	Aeromonas hydrophila	4783511	97.91	2.67	Environment	Completed Genome	ftp://ftp.ncbi.nlm.nih.gov/genomes/all/GCA/022/759/545/GCA_022759545.1_ASM2275954v1
Cluster 1	GCA_022759605.1	Bacteria;Pseudomonadota;Gammaproteobacteria;Enterobacterales;Enterobacteriaceae;Klebsiella;Klebsiella aerogenes	Klebsiella aerogenes	5146019	96.85	3.71	Human	Completed Genome	ftp://ftp.ncbi.nlm.nih.gov/genomes/all/GCA/022/759/605/GCA_022759605.1_ASM2275960v1
Cluster 1	GCA_022761625.1	Bacteria;Pseudomonadota;Gammaproteobacteria;Enterobacterales;Enterobacteriaceae;Escherichia;Escherichia coli	Escherichia coli	133117	99.21	0.96	Human	Scaffold	ftp://ftp.ncbi.nlm.nih.gov/genomes/all/GCA/022/761/625/GCA_022761625.1_ASM2276162v1
Cluster 1	GCA_022765185.1	Bacteria;Pseudomonadota;Gammaproteobacteria;Enterobacterales;Enterobacteriaceae;Escherichia;Escherichia coli	Escherichia coli	199877	99.24	0.73	Human	Scaffold	ftp://ftp.ncbi.nlm.nih.gov/genomes/all/GCA/022/765/185/GCA_022765185.1_ASM2276518v1
Cluster 1	GCA_022765335.1	Bacteria;Pseudomonadota;Gammaproteobacteria;Enterobacterales;Enterobacteriaceae;Escherichia;Escherichia coli	Escherichia coli	192893	99.37	0.29	Human	Scaffold	ftp://ftp.ncbi.nlm.nih.gov/genomes/all/GCA/022/765/335/GCA_022765335.1_ASM2276533v1
Cluster 1	GCA_022765635.1	Bacteria;Pseudomonadota;Gammaproteobacteria;Enterobacterales;Enterobacteriaceae;Escherichia;Escherichia coli	Escherichia coli	157194	98.9	0.25	Human	Scaffold	ftp://ftp.ncbi.nlm.nih.gov/genomes/all/GCA/022/765/635/GCA_022765635.1_ASM2276563v1
Cluster 1	GCA_022846255.1	Bacteria;Pseudomonadota;Gammaproteobacteria;Enterobacterales;Enterobacteriaceae;Escherichia;Escherichia coli	Escherichia coli	4939895	98.83	0.96	Human	Completed Genome	ftp://ftp.ncbi.nlm.nih.gov/genomes/all/GCA/022/846/255/GCA_022846255.1_ASM2284625v1
Cluster 1	GCA_022846555.1	Bacteria;Pseudomonadota;Gammaproteobacteria;Enterobacterales;Enterobacteriaceae;Citrobacter;Citrobacter koseri	Citrobacter koseri	4804009	98.99	0.38	Human	Completed Genome	ftp://ftp.ncbi.nlm.nih.gov/genomes/all/GCA/022/846/555/GCA_022846555.1_ASM2284655v1
Cluster 1	GCA_022921155.1	Bacteria;Pseudomonadota;Gammaproteobacteria;Aeromonadales;Aeromonadaceae;Aeromonas;Aeromonas veronii	Aeromonas veronii	5069244	96.45	2.55	Environment	Completed Genome	ftp://ftp.ncbi.nlm.nih.gov/genomes/all/GCA/022/921/155/GCA_022921155.1_ASM2292115v1
Cluster 1	GCA_022972605.1	Bacteria;Pseudomonadota;Gammaproteobacteria;Enterobacterales;Enterobacteriaceae;Escherichia;Escherichia coli	Escherichia coli	126960	99.37	0.47	Animal	Scaffold	ftp://ftp.ncbi.nlm.nih.gov/genomes/all/GCA/022/972/605/GCA_022972605.1_ASM2297260v1
Cluster 1	GCA_022972835.1	Bacteria;Pseudomonadota;Gammaproteobacteria;Enterobacterales;Enterobacteriaceae;Escherichia;Escherichia coli	Escherichia coli	147492	99.03	1.41	Animal	Scaffold	ftp://ftp.ncbi.nlm.nih.gov/genomes/all/GCA/022/972/835/GCA_022972835.1_ASM2297283v1
Cluster 1	GCA_023023045.1	Bacteria;Pseudomonadota;Gammaproteobacteria;Enterobacterales;Enterobacteriaceae;Enterobacter;Enterobacter asburiae	Enterobacter asburiae	4582364	99.52	0.66	Human	Completed Genome	ftp://ftp.ncbi.nlm.nih.gov/genomes/all/GCA/023/023/045/GCA_023023045.1_ASM2302304v1
Cluster 1	GCA_023023085.1	Bacteria;Pseudomonadota;Gammaproteobacteria;Enterobacterales;Enterobacteriaceae;Enterobacter;Enterobacter cloacae	Enterobacter cloacae subsp. cloacae	4751455	97.16	1.16	Human	Completed Genome	ftp://ftp.ncbi.nlm.nih.gov/genomes/all/GCA/023/023/085/GCA_023023085.1_ASM2302308v1
Cluster 1	GCA_023023265.1	Bacteria;Pseudomonadota;Gammaproteobacteria;Enterobacterales;Enterobacteriaceae;Enterobacter;Enterobacter asburiae	Enterobacter asburiae	4889693	99.59	1.68	Human	Completed Genome	ftp://ftp.ncbi.nlm.nih.gov/genomes/all/GCA/023/023/265/GCA_023023265.1_ASM2302326v1
Cluster 1	GCA_023093415.1	Bacteria;Pseudomonadota;Gammaproteobacteria;Aeromonadales;Aeromonadaceae;Aeromonas;Aeromonas caviae	Aeromonas caviae	93475	99.89	0.56	Human	Scaffold	ftp://ftp.ncbi.nlm.nih.gov/genomes/all/GCA/023/093/415/GCA_023093415.1_ASM2309341v1
Cluster 1	GCA_023154915.1	Bacteria;Pseudomonadota;Gammaproteobacteria;Enterobacterales;Enterobacteriaceae;Enterobacter;Enterobacter bugandensis	Enterobacter bugandensis	560083	95.98	0.05	Human	Scaffold	ftp://ftp.ncbi.nlm.nih.gov/genomes/all/GCA/023/154/915/GCA_023154915.1_ASM2315491v1
Cluster 1	GCA_023238665.1	Bacteria;Pseudomonadota;Gammaproteobacteria;Enterobacterales;Enterobacteriaceae;Enterobacter;Enterobacter cloacae	Enterobacter cloacae	4746662	98.67	1.69	Human	Completed Genome	ftp://ftp.ncbi.nlm.nih.gov/genomes/all/GCA/023/238/665/GCA_023238665.1_ASM2323866v1
Cluster 1	GCA_023516295.1	Bacteria;Pseudomonadota;Gammaproteobacteria;Pasteurellales;Pasteurellaceae;Mannheimia;Mannheimia haemolytica	Mannheimia haemolytica	2234002	99.81	0.46	Animal	Completed Genome	ftp://ftp.ncbi.nlm.nih.gov/genomes/all/GCA/023/516/295/GCA_023516295.1_ASM2351629v1
Cluster 1	GCA_023573045.1	Bacteria;Pseudomonadota;Gammaproteobacteria;Pasteurellales;Pasteurellaceae;Pasteurella;Pasteurella multocida	Pasteurella multocida	2268200	99.55	0	Animal	Completed Genome	ftp://ftp.ncbi.nlm.nih.gov/genomes/all/GCA/023/573/045/GCA_023573045.1_ASM2357304v1
Cluster 1	GCA_023573105.1	Bacteria;Pseudomonadota;Gammaproteobacteria;Pasteurellales;Pasteurellaceae;Pasteurella;Pasteurella multocida	Pasteurella multocida	2253720	99.55	0	Animal	Completed Genome	ftp://ftp.ncbi.nlm.nih.gov/genomes/all/GCA/023/573/105/GCA_023573105.1_ASM2357310v1
Cluster 1	GCA_023586965.1	Bacteria;Pseudomonadota;Gammaproteobacteria;Pasteurellales;Pasteurellaceae;Pasteurella;Pasteurella multocida	Pasteurella multocida	2251880	99.32	0	Animal	Completed Genome	ftp://ftp.ncbi.nlm.nih.gov/genomes/all/GCA/023/586/965/GCA_023586965.1_ASM2358696v1
Cluster 1	GCA_023587085.1	Bacteria;Pseudomonadota;Gammaproteobacteria;Pasteurellales;Pasteurellaceae;Pasteurella;Pasteurella multocida	Pasteurella multocida	2260921	99.32	0.23	Animal	Completed Genome	ftp://ftp.ncbi.nlm.nih.gov/genomes/all/GCA/023/587/085/GCA_023587085.1_ASM2358708v1
Cluster 1	GCA_023587305.1	Bacteria;Pseudomonadota;Gammaproteobacteria;Pasteurellales;Pasteurellaceae;Pasteurella;Pasteurella multocida	Pasteurella multocida	2272615	99.32	0	Animal	Completed Genome	ftp://ftp.ncbi.nlm.nih.gov/genomes/all/GCA/023/587/305/GCA_023587305.1_ASM2358730v1
Cluster 1	GCA_023587625.1	Bacteria;Pseudomonadota;Gammaproteobacteria;Pasteurellales;Pasteurellaceae;Pasteurella;Pasteurella multocida	Pasteurella multocida	2315060	99.32	0	Animal	Completed Genome	ftp://ftp.ncbi.nlm.nih.gov/genomes/all/GCA/023/587/625/GCA_023587625.1_ASM2358762v1
Cluster 1	GCA_023604425.1	Bacteria;Pseudomonadota;Gammaproteobacteria;Enterobacterales;Morganellaceae;Proteus;Proteus mirabilis	Proteus mirabilis	173743	95.53	4.82	Animal	Scaffold	ftp://ftp.ncbi.nlm.nih.gov/genomes/all/GCA/023/604/425/GCA_023604425.1_ASM2360442v1
Cluster 1	GCA_023749005.1	Bacteria;Pseudomonadota;Gammaproteobacteria;Enterobacterales;Enterobacteriaceae;Enterobacter;Enterobacter hormaechei	Enterobacter hormaechei	372788	99.47	0.43	Human	Scaffold	ftp://ftp.ncbi.nlm.nih.gov/genomes/all/GCA/023/749/005/GCA_023749005.1_ASM2374900v1
Cluster 1	GCA_023749275.1	Bacteria;Pseudomonadota;Gammaproteobacteria;Enterobacterales;Enterobacteriaceae;Enterobacter;Enterobacter asburiae	Enterobacter asburiae	195549	98.89	0.31	Human	Scaffold	ftp://ftp.ncbi.nlm.nih.gov/genomes/all/GCA/023/749/275/GCA_023749275.1_ASM2374927v1
Cluster 1	GCA_023749345.1	Bacteria;Pseudomonadota;Gammaproteobacteria;Enterobacterales;Enterobacteriaceae;Enterobacter;Enterobacter hormaechei	Enterobacter hormaechei	160905	99.87	1.22	Human	Scaffold	ftp://ftp.ncbi.nlm.nih.gov/genomes/all/GCA/023/749/345/GCA_023749345.1_ASM2374934v1
Cluster 1	GCA_023749615.1	Bacteria;Pseudomonadota;Gammaproteobacteria;Enterobacterales;Enterobacteriaceae;Enterobacter;Enterobacter cloacae	Enterobacter cloacae	1237025	98.52	0.55	Human	Scaffold	ftp://ftp.ncbi.nlm.nih.gov/genomes/all/GCA/023/749/615/GCA_023749615.1_ASM2374961v1
Cluster 1	GCA_023750095.1	Bacteria;Pseudomonadota;Gammaproteobacteria;Enterobacterales;Enterobacteriaceae;Enterobacter;Enterobacter hormaechei	Enterobacter hormaechei	223066	99.47	0.33	Human	Scaffold	ftp://ftp.ncbi.nlm.nih.gov/genomes/all/GCA/023/750/095/GCA_023750095.1_ASM2375009v1
Cluster 1	GCA_023751185.1	Bacteria;Pseudomonadota;Gammaproteobacteria;Enterobacterales;Enterobacteriaceae;Enterobacter;Enterobacter cloacae	Enterobacter cloacae	139974	99.51	2.38	Human	Scaffold	ftp://ftp.ncbi.nlm.nih.gov/genomes/all/GCA/023/751/185/GCA_023751185.1_ASM2375118v1
Cluster 1	GCA_023751655.1	Bacteria;Pseudomonadota;Gammaproteobacteria;Enterobacterales;Enterobacteriaceae;Enterobacter;Enterobacter asburiae	Enterobacter asburiae	2654313	99.5	0.17	Human	Scaffold	ftp://ftp.ncbi.nlm.nih.gov/genomes/all/GCA/023/751/655/GCA_023751655.1_ASM2375165v1
Cluster 1	GCA_023751845.1	Bacteria;Pseudomonadota;Gammaproteobacteria;Enterobacterales;Enterobacteriaceae;Enterobacter;Enterobacter hormaechei	Enterobacter hormaechei	246573	99.92	0.38	Human	Scaffold	ftp://ftp.ncbi.nlm.nih.gov/genomes/all/GCA/023/751/845/GCA_023751845.1_ASM2375184v1
Cluster 1	GCA_023752275.1	Bacteria;Pseudomonadota;Gammaproteobacteria;Enterobacterales;Enterobacteriaceae;Enterobacter;Enterobacter asburiae	Enterobacter asburiae	680084	99.46	0.08	Human	Scaffold	ftp://ftp.ncbi.nlm.nih.gov/genomes/all/GCA/023/752/275/GCA_023752275.1_ASM2375227v1
Cluster 1	GCA_023752605.1	Bacteria;Pseudomonadota;Gammaproteobacteria;Enterobacterales;Enterobacteriaceae;Enterobacter;Enterobacter asburiae	Enterobacter asburiae	484777	99.35	1.46	Human	Scaffold	ftp://ftp.ncbi.nlm.nih.gov/genomes/all/GCA/023/752/605/GCA_023752605.1_ASM2375260v1
Cluster 1	GCA_023752865.1	Bacteria;Pseudomonadota;Gammaproteobacteria;Enterobacterales;Enterobacteriaceae;Enterobacter;Enterobacter asburiae	Enterobacter asburiae	293926	98.91	0.51	Human	Scaffold	ftp://ftp.ncbi.nlm.nih.gov/genomes/all/GCA/023/752/865/GCA_023752865.1_ASM2375286v1
Cluster 1	GCA_023755625.1	Bacteria;Pseudomonadota;Gammaproteobacteria;Enterobacterales;Enterobacteriaceae;Enterobacter;Enterobacter hormaechei	Enterobacter hormaechei	195964	99.77	0.67	Human	Scaffold	ftp://ftp.ncbi.nlm.nih.gov/genomes/all/GCA/023/755/625/GCA_023755625.1_ASM2375562v1
Cluster 1	GCA_023920605.1	Bacteria;Pseudomonadota;Gammaproteobacteria;Enterobacterales;Enterobacteriaceae;Enterobacter;Enterobacter cloacae	Enterobacter cloacae	5350777	98.61	1.25	Human	Completed Genome	ftp://ftp.ncbi.nlm.nih.gov/genomes/all/GCA/023/920/605/GCA_023920605.1_ASM2392060v1
Cluster 1	GCA_023921405.1	Bacteria;Pseudomonadota;Gammaproteobacteria;Aeromonadales;Aeromonadaceae;Aeromonas;Aeromonas veronii	Aeromonas veronii	4565950	99.1	1.95	Human	Completed Genome	ftp://ftp.ncbi.nlm.nih.gov/genomes/all/GCA/023/921/405/GCA_023921405.1_ASM2392140v1
Cluster 1	GCA_024355665.1	Bacteria;Pseudomonadota;Gammaproteobacteria;Enterobacterales;Enterobacteriaceae;Klebsiella;Klebsiella pneumoniae	Klebsiella pneumoniae	225171	97.13	1.31	Human	Scaffold	ftp://ftp.ncbi.nlm.nih.gov/genomes/all/GCA/024/355/665/GCA_024355665.1_ASM2435566v1
Cluster 1	GCA_024475915.1	Bacteria;Pseudomonadota;Gammaproteobacteria;Enterobacterales;Enterobacteriaceae;Escherichia;Escherichia coli	Escherichia coli	84630	99.97	0.86	Animal	Scaffold	ftp://ftp.ncbi.nlm.nih.gov/genomes/all/GCA/024/475/915/GCA_024475915.1_ASM2447591v1
Cluster 1	GCA_024547085.1	Bacteria;Pseudomonadota;Gammaproteobacteria;Enterobacterales;Enterobacteriaceae;Escherichia;Escherichia coli	Escherichia coli	171726	98.82	0.25	Human	Scaffold	ftp://ftp.ncbi.nlm.nih.gov/genomes/all/GCA/024/547/085/GCA_024547085.1_ASM2454708v1
Cluster 1	GCA_024585745.1	Bacteria;Pseudomonadota;Gammaproteobacteria;Enterobacterales;Enterobacteriaceae;Escherichia;Escherichia coli	Escherichia coli	4651255	99.27	0.96	Animal	Completed Genome	ftp://ftp.ncbi.nlm.nih.gov/genomes/all/GCA/024/585/745/GCA_024585745.1_ASM2458574v1
Cluster 1	GCA_024599655.1	Bacteria;Pseudomonadota;Gammaproteobacteria;Enterobacterales;Enterobacteriaceae;Enterobacter;Enterobacter asburiae	Enterobacter asburiae	4838058	99.05	0.58	Human	Completed Genome	ftp://ftp.ncbi.nlm.nih.gov/genomes/all/GCA/024/599/655/GCA_024599655.1_ASM2459965v1
Cluster 1	GCA_024662035.1	Bacteria;Pseudomonadota;Gammaproteobacteria;Enterobacterales;Enterobacteriaceae;Citrobacter;Citrobacter youngae	Citrobacter youngae	5010143	99.32	1.43	Human	Completed Genome	ftp://ftp.ncbi.nlm.nih.gov/genomes/all/GCA/024/662/035/GCA_024662035.1_ASM2466203v1
Cluster 1	GCA_024895235.1	Bacteria;Pseudomonadota;Gammaproteobacteria;Enterobacterales;Enterobacteriaceae;Enterobacter;Enterobacter kobei	Enterobacter kobei	119348	99.8	0.65	Environment	Scaffold	ftp://ftp.ncbi.nlm.nih.gov/genomes/all/GCA/024/895/235/GCA_024895235.1_ASM2489523v1
Cluster 1	GCA_024971835.1	Bacteria;Pseudomonadota;Gammaproteobacteria;Aeromonadales;Aeromonadaceae;Aeromonas;Aeromonas veronii	Aeromonas veronii	5029035	97.51	2.25	Environment	Completed Genome	ftp://ftp.ncbi.nlm.nih.gov/genomes/all/GCA/024/971/835/GCA_024971835.1_ASM2497183v1
Cluster 1	GCA_024998425.1	Bacteria;Pseudomonadota;Gammaproteobacteria;Enterobacterales;Enterobacteriaceae;Klebsiella;Klebsiella pneumoniae	Klebsiella pneumoniae	116921	97.81	2.24	Environment	Scaffold	ftp://ftp.ncbi.nlm.nih.gov/genomes/all/GCA/024/998/425/GCA_024998425.1_ASM2499842v1
Cluster 1	GCA_025155325.1	Bacteria;Pseudomonadota;Gammaproteobacteria;Enterobacterales;Enterobacteriaceae;Escherichia;Escherichia coli	Escherichia coli	198332	99.97	0.12	Human	Scaffold	ftp://ftp.ncbi.nlm.nih.gov/genomes/all/GCA/025/155/325/GCA_025155325.1_ASM2515532v1
Cluster 1	GCA_025200595.1	Bacteria;Pseudomonadota;Gammaproteobacteria;Enterobacterales;Enterobacteriaceae;Cronobacter;Cronobacter sakazakii	Cronobacter sakazakii	4249638	99.97	0.14	Animal	Completed Genome	ftp://ftp.ncbi.nlm.nih.gov/genomes/all/GCA/025/200/595/GCA_025200595.1_ASM2520059v1
Cluster 1	GCA_025246125.1	Bacteria;Pseudomonadota;Gammaproteobacteria;Enterobacterales;Enterobacteriaceae;Enterobacter;Enterobacter mori	Enterobacter mori	632440	99.38	0.65	Enironment	Scaffold	ftp://ftp.ncbi.nlm.nih.gov/genomes/all/GCA/025/246/125/GCA_025246125.1_ASM2524612v1
Cluster 1	GCA_025266835.1	Bacteria;Pseudomonadota;Gammaproteobacteria;Aeromonadales;Aeromonadaceae;Aeromonas;Aeromonas dhakensis	Aeromonas dhakensis	997267	99.95	0.4	Animal	Chromosome	ftp://ftp.ncbi.nlm.nih.gov/genomes/all/GCA/025/266/835/GCA_025266835.1_ASM2526683v1
Cluster 1	GCA_025402875.1	Bacteria;Pseudomonadota;Gammaproteobacteria;Alteromonadales;Shewanellaceae;Shewanella;Shewanella putrefaciens	Shewanella putrefaciens	4589493	99.64	0.39	Environment	Completed Genome	ftp://ftp.ncbi.nlm.nih.gov/genomes/all/GCA/025/402/875/GCA_025402875.1_ASM2540287v1
Cluster 1	GCA_025535395.1	Bacteria;Pseudomonadota;Gammaproteobacteria;Enterobacterales;Enterobacteriaceae;Enterobacter;Enterobacter bugandensis	Enterobacter bugandensis	466476	96.18	0.79	Animal	Scaffold	ftp://ftp.ncbi.nlm.nih.gov/genomes/all/GCA/025/535/395/GCA_025535395.1_ASM2553539v1
Cluster 1	GCA_025535675.1	Bacteria;Pseudomonadota;Gammaproteobacteria;Enterobacterales;Enterobacteriaceae;Enterobacter;Enterobacter bugandensis	Enterobacter bugandensis	237916	96.03	0.57	Animal	Scaffold	ftp://ftp.ncbi.nlm.nih.gov/genomes/all/GCA/025/535/675/GCA_025535675.1_ASM2553567v1
Cluster 1	GCA_025535695.1	Bacteria;Pseudomonadota;Gammaproteobacteria;Enterobacterales;Enterobacteriaceae;Enterobacter;Enterobacter quasiroggenkampii	Enterobacter quasiroggenkampii	287662	96.75	0.12	Animal	Scaffold	ftp://ftp.ncbi.nlm.nih.gov/genomes/all/GCA/025/535/695/GCA_025535695.1_ASM2553569v1
Cluster 1	GCA_025535845.1	Bacteria;Pseudomonadota;Gammaproteobacteria;Enterobacterales;Enterobacteriaceae;Enterobacter;Enterobacter quasiroggenkampii	Enterobacter quasiroggenkampii	367362	96.29	0.48	Animal	Scaffold	ftp://ftp.ncbi.nlm.nih.gov/genomes/all/GCA/025/535/845/GCA_025535845.1_ASM2553584v1
Cluster 1	GCA_025535895.1	Bacteria;Pseudomonadota;Gammaproteobacteria;Enterobacterales;Enterobacteriaceae;Enterobacter;Enterobacter quasiroggenkampii	Enterobacter quasiroggenkampii	311533	96.48	0.13	Animal	Scaffold	ftp://ftp.ncbi.nlm.nih.gov/genomes/all/GCA/025/535/895/GCA_025535895.1_ASM2553589v1
Cluster 1	GCA_025536015.1	Bacteria;Pseudomonadota;Gammaproteobacteria;Enterobacterales;Enterobacteriaceae;Enterobacter;Enterobacter quasiroggenkampii	Enterobacter quasiroggenkampii	145876	96.46	0.49	Animal	Scaffold	ftp://ftp.ncbi.nlm.nih.gov/genomes/all/GCA/025/536/015/GCA_025536015.1_Q3809
Cluster 1	GCA_025536035.1	Bacteria;Pseudomonadota;Gammaproteobacteria;Enterobacterales;Enterobacteriaceae;Enterobacter;Enterobacter roggenkampii	Enterobacter roggenkampii	454422	99.07	0.15	Animal	Scaffold	ftp://ftp.ncbi.nlm.nih.gov/genomes/all/GCA/025/536/035/GCA_025536035.1_ASM2553603v1
Cluster 1	GCA_025536075.1	Bacteria;Pseudomonadota;Gammaproteobacteria;Enterobacterales;Enterobacteriaceae;Enterobacter;Enterobacter sichuanensis	Enterobacter sichuanensis	239576	96.16	0.55	Animal	Scaffold	ftp://ftp.ncbi.nlm.nih.gov/genomes/all/GCA/025/536/075/GCA_025536075.1_ASM2553607v1
Cluster 1	GCA_025536155.1	Bacteria;Pseudomonadota;Gammaproteobacteria;Enterobacterales;Enterobacteriaceae;Enterobacter;Enterobacter quasiroggenkampii	Enterobacter quasiroggenkampii	160228	96.48	1.24	Enironment	Scaffold	ftp://ftp.ncbi.nlm.nih.gov/genomes/all/GCA/025/536/155/GCA_025536155.1_Q3794
Cluster 1	GCA_025536175.1	Bacteria;Pseudomonadota;Gammaproteobacteria;Enterobacterales;Enterobacteriaceae;Enterobacter;Enterobacter cloacae	Enterobacter cloacae	415363	95.38	1.43	Animal	Scaffold	ftp://ftp.ncbi.nlm.nih.gov/genomes/all/GCA/025/536/175/GCA_025536175.1_ASM2553617v1
Cluster 1	GCA_025536215.1	Bacteria;Pseudomonadota;Gammaproteobacteria;Enterobacterales;Enterobacteriaceae;Enterobacter;Enterobacter quasiroggenkampii	Enterobacter quasiroggenkampii	58771	96.35	0.72	Animal	Scaffold	ftp://ftp.ncbi.nlm.nih.gov/genomes/all/GCA/025/536/215/GCA_025536215.1_ASM2553621v1
Cluster 1	GCA_025536275.1	Bacteria;Pseudomonadota;Gammaproteobacteria;Enterobacterales;Enterobacteriaceae;Enterobacter;Enterobacter cloacae	Enterobacter cloacae	322919	95.68	1.04	Animal	Scaffold	ftp://ftp.ncbi.nlm.nih.gov/genomes/all/GCA/025/536/275/GCA_025536275.1_ASM2553627v1
Cluster 1	GCA_025536315.1	Bacteria;Pseudomonadota;Gammaproteobacteria;Enterobacterales;Enterobacteriaceae;Enterobacter;Enterobacter bugandensis	Enterobacter bugandensis	116005	96.17	1.33	Enironment	Scaffold	ftp://ftp.ncbi.nlm.nih.gov/genomes/all/GCA/025/536/315/GCA_025536315.1_ASM2553631v1
Cluster 1	GCA_025536395.1	Bacteria;Pseudomonadota;Gammaproteobacteria;Enterobacterales;Enterobacteriaceae;Enterobacter;Enterobacter quasiroggenkampii	Enterobacter quasiroggenkampii	214877	96.27	1.96	Animal	Scaffold	ftp://ftp.ncbi.nlm.nih.gov/genomes/all/GCA/025/536/395/GCA_025536395.1_ASM2553639v1
Cluster 1	GCA_025536415.1	Bacteria;Pseudomonadota;Gammaproteobacteria;Enterobacterales;Enterobacteriaceae;Enterobacter;Enterobacter quasiroggenkampii	Enterobacter quasiroggenkampii	486371	96.68	0.76	Animal	Scaffold	ftp://ftp.ncbi.nlm.nih.gov/genomes/all/GCA/025/536/415/GCA_025536415.1_Q3804
Cluster 1	GCA_025536455.1	Bacteria;Pseudomonadota;Gammaproteobacteria;Enterobacterales;Enterobacteriaceae;Enterobacter;Enterobacter quasiroggenkampii	Enterobacter quasiroggenkampii	387748	96.69	0.2	Animal	Scaffold	ftp://ftp.ncbi.nlm.nih.gov/genomes/all/GCA/025/536/455/GCA_025536455.1_ASM2553645v1
Cluster 1	GCA_025536535.1	Bacteria;Pseudomonadota;Gammaproteobacteria;Enterobacterales;Enterobacteriaceae;Escherichia;Escherichia coli	Escherichia coli	137478	95.49	1.63	Animal	Scaffold	ftp://ftp.ncbi.nlm.nih.gov/genomes/all/GCA/025/536/535/GCA_025536535.1_ASM2553653v1
Cluster 1	GCA_025536595.1	Bacteria;Pseudomonadota;Gammaproteobacteria;Enterobacterales;Enterobacteriaceae;Enterobacter;Enterobacter asburiae	Enterobacter asburiae	262225	96.61	1.16	Animal	Scaffold	ftp://ftp.ncbi.nlm.nih.gov/genomes/all/GCA/025/536/595/GCA_025536595.1_ASM2553659v1
Cluster 1	GCA_025536635.1	Bacteria;Pseudomonadota;Gammaproteobacteria;Enterobacterales;Enterobacteriaceae;Escherichia;Escherichia coli	Escherichia coli	94364	95.88	1.7	Animal	Scaffold	ftp://ftp.ncbi.nlm.nih.gov/genomes/all/GCA/025/536/635/GCA_025536635.1_Q0179
Cluster 1	GCA_025572135.1	Bacteria;Pseudomonadota;Gammaproteobacteria;Vibrionales;Vibrionaceae;Vibrio;Vibrio alginolyticus	Vibrio alginolyticus	292762	100	0.64	Environment	Scaffold	ftp://ftp.ncbi.nlm.nih.gov/genomes/all/GCA/025/572/135/GCA_025572135.1_ASM2557213v1
Cluster 1	GCA_025572215.1	Bacteria;Pseudomonadota;Gammaproteobacteria;Vibrionales;Vibrionaceae;Vibrio;Vibrio alginolyticus	Vibrio alginolyticus	405246	100	0.02	Environment	Scaffold	ftp://ftp.ncbi.nlm.nih.gov/genomes/all/GCA/025/572/215/GCA_025572215.1_ASM2557221v1
Cluster 1	GCA_025751375.1	Bacteria;Pseudomonadota;Gammaproteobacteria;Enterobacterales;Enterobacteriaceae;Escherichia;Escherichia coli	Escherichia coli	64946	99.2	0.44	Environment	Scaffold	ftp://ftp.ncbi.nlm.nih.gov/genomes/all/GCA/025/751/375/GCA_025751375.1_ASM2575137v1
Cluster 1	GCA_025917705.1	Bacteria;Pseudomonadota;Gammaproteobacteria;Vibrionales;Vibrionaceae;Vibrio;Vibrio parahaemolyticus	Vibrio parahaemolyticus	3355318	97.25	2.4	Animal	Completed Genome	ftp://ftp.ncbi.nlm.nih.gov/genomes/all/GCA/025/917/705/GCA_025917705.1_ASM2591770v1
Cluster 1	GCA_025920025.1	Bacteria;Pseudomonadota;Gammaproteobacteria;Vibrionales;Vibrionaceae;Vibrio;Vibrio parahaemolyticus	Vibrio parahaemolyticus	3421970	99.55	1.5	Animal	Completed Genome	ftp://ftp.ncbi.nlm.nih.gov/genomes/all/GCA/025/920/025/GCA_025920025.1_ASM2592002v1
Cluster 1	GCA_026013215.1	Bacteria;Pseudomonadota;Gammaproteobacteria;Aeromonadales;Aeromonadaceae;Aeromonas;Aeromonas caviae	Aeromonas caviae	76772	99.46	0.8	Human	Chromosome	ftp://ftp.ncbi.nlm.nih.gov/genomes/all/GCA/026/013/215/GCA_026013215.1_ASM2601321v1
Cluster 1	GCA_026109755.1	Bacteria;Pseudomonadota;Gammaproteobacteria;Enterobacterales;Enterobacteriaceae;Enterobacter;Enterobacter hormaechei	Enterobacter hormaechei subsp. xiangfangensis	4841924	99.51	1.22	Human	Completed Genome	ftp://ftp.ncbi.nlm.nih.gov/genomes/all/GCA/026/109/755/GCA_026109755.1_ASM2610975v1
Cluster 1	GCA_026155345.1	Bacteria;Pseudomonadota;Gammaproteobacteria;Enterobacterales;Enterobacteriaceae;Enterobacter;Enterobacter asburiae	Enterobacter asburiae	449685	99.48	0.17	Enironment	Scaffold	ftp://ftp.ncbi.nlm.nih.gov/genomes/all/GCA/026/155/345/GCA_026155345.1_ASM2615534v1
Cluster 1	GCA_026230505.1	Bacteria;Pseudomonadota;Gammaproteobacteria;Aeromonadales;Aeromonadaceae;Aeromonas;Aeromonas veronii	Aeromonas veronii	110021	99.27	2.13	Animal	Scaffold	ftp://ftp.ncbi.nlm.nih.gov/genomes/all/GCA/026/230/505/GCA_026230505.1_ASM2623050v1
Cluster 1	GCA_026230585.1	Bacteria;Pseudomonadota;Gammaproteobacteria;Aeromonadales;Aeromonadaceae;Aeromonas;Aeromonas veronii	Aeromonas veronii	130975	99.09	2.23	Animal	Scaffold	ftp://ftp.ncbi.nlm.nih.gov/genomes/all/GCA/026/230/585/GCA_026230585.1_ASM2623058v1
Cluster 1	GCA_026240835.1	Bacteria;Pseudomonadota;Gammaproteobacteria;Enterobacterales;Enterobacteriaceae;Citrobacter;Citrobacter freundii	Citrobacter freundii	5147192	99.9	0.84	Human	Completed Genome	ftp://ftp.ncbi.nlm.nih.gov/genomes/all/GCA/026/240/835/GCA_026240835.1_ASM2624083v1
Cluster 1	GCA_026537565.1	Bacteria;Pseudomonadota;Gammaproteobacteria;Vibrionales;Vibrionaceae;Vibrio;Vibrio parahaemolyticus	Vibrio parahaemolyticus	267513	99.52	2.11	Environment	Scaffold	ftp://ftp.ncbi.nlm.nih.gov/genomes/all/GCA/026/537/565/GCA_026537565.1_ASM2653756v1
Cluster 1	GCA_026537575.1	Bacteria;Pseudomonadota;Gammaproteobacteria;Vibrionales;Vibrionaceae;Vibrio;Vibrio parahaemolyticus	Vibrio parahaemolyticus	172769	99.54	3.34	Animal	Scaffold	ftp://ftp.ncbi.nlm.nih.gov/genomes/all/GCA/026/537/575/GCA_026537575.1_ASM2653757v1
Cluster 1	GCA_026537585.1	Bacteria;Pseudomonadota;Gammaproteobacteria;Vibrionales;Vibrionaceae;Vibrio;Vibrio parahaemolyticus	Vibrio parahaemolyticus	192111	99.68	2.24	Environment	Scaffold	ftp://ftp.ncbi.nlm.nih.gov/genomes/all/GCA/026/537/585/GCA_026537585.1_ASM2653758v1
Cluster 1	GCA_026537635.1	Bacteria;Pseudomonadota;Gammaproteobacteria;Vibrionales;Vibrionaceae;Vibrio;Vibrio parahaemolyticus	Vibrio parahaemolyticus	240586	99.87	4.11	Environment	Scaffold	ftp://ftp.ncbi.nlm.nih.gov/genomes/all/GCA/026/537/635/GCA_026537635.1_ASM2653763v1
Cluster 1	GCA_026537665.1	Bacteria;Pseudomonadota;Gammaproteobacteria;Vibrionales;Vibrionaceae;Vibrio;Vibrio parahaemolyticus	Vibrio parahaemolyticus	232268	96.58	1.49	Animal	Scaffold	ftp://ftp.ncbi.nlm.nih.gov/genomes/all/GCA/026/537/665/GCA_026537665.1_ASM2653766v1
Cluster 1	GCA_026537685.1	Bacteria;Pseudomonadota;Gammaproteobacteria;Vibrionales;Vibrionaceae;Vibrio;Vibrio parahaemolyticus	Vibrio parahaemolyticus	222945	98.95	2.09	Environment	Scaffold	ftp://ftp.ncbi.nlm.nih.gov/genomes/all/GCA/026/537/685/GCA_026537685.1_ASM2653768v1
Cluster 1	GCA_026537705.1	Bacteria;Pseudomonadota;Gammaproteobacteria;Vibrionales;Vibrionaceae;Vibrio;Vibrio parahaemolyticus	Vibrio parahaemolyticus	185625	99.39	2.28	Environment	Scaffold	ftp://ftp.ncbi.nlm.nih.gov/genomes/all/GCA/026/537/705/GCA_026537705.1_ASM2653770v1
Cluster 1	GCA_026537765.1	Bacteria;Pseudomonadota;Gammaproteobacteria;Vibrionales;Vibrionaceae;Vibrio;Vibrio parahaemolyticus	Vibrio parahaemolyticus	265717	99.64	2.67	Animal	Scaffold	ftp://ftp.ncbi.nlm.nih.gov/genomes/all/GCA/026/537/765/GCA_026537765.1_ASM2653776v1
Cluster 1	GCA_026537775.1	Bacteria;Pseudomonadota;Gammaproteobacteria;Vibrionales;Vibrionaceae;Vibrio;Vibrio parahaemolyticus	Vibrio parahaemolyticus	277530	99.34	1.14	Animal	Scaffold	ftp://ftp.ncbi.nlm.nih.gov/genomes/all/GCA/026/537/775/GCA_026537775.1_ASM2653777v1
Cluster 1	GCA_026537805.1	Bacteria;Pseudomonadota;Gammaproteobacteria;Vibrionales;Vibrionaceae;Vibrio;Vibrio parahaemolyticus	Vibrio parahaemolyticus	238125	99.52	2.82	Environment	Scaffold	ftp://ftp.ncbi.nlm.nih.gov/genomes/all/GCA/026/537/805/GCA_026537805.1_ASM2653780v1
Cluster 1	GCA_026537815.1	Bacteria;Pseudomonadota;Gammaproteobacteria;Vibrionales;Vibrionaceae;Vibrio;Vibrio parahaemolyticus	Vibrio parahaemolyticus	188924	99.79	2.78	Animal	Scaffold	ftp://ftp.ncbi.nlm.nih.gov/genomes/all/GCA/026/537/815/GCA_026537815.1_ASM2653781v1
Cluster 1	GCA_026537865.1	Bacteria;Pseudomonadota;Gammaproteobacteria;Vibrionales;Vibrionaceae;Vibrio;Vibrio parahaemolyticus	Vibrio parahaemolyticus	207453	99.69	3.41	Animal	Scaffold	ftp://ftp.ncbi.nlm.nih.gov/genomes/all/GCA/026/537/865/GCA_026537865.1_ASM2653786v1
Cluster 1	GCA_026537875.1	Bacteria;Pseudomonadota;Gammaproteobacteria;Vibrionales;Vibrionaceae;Vibrio;Vibrio parahaemolyticus	Vibrio parahaemolyticus	165960	99.83	2.74	Environment	Scaffold	ftp://ftp.ncbi.nlm.nih.gov/genomes/all/GCA/026/537/875/GCA_026537875.1_ASM2653787v1
Cluster 1	GCA_026538005.1	Bacteria;Pseudomonadota;Gammaproteobacteria;Vibrionales;Vibrionaceae;Vibrio;Vibrio parahaemolyticus	Vibrio parahaemolyticus	270663	99.45	3.27	Animal	Scaffold	ftp://ftp.ncbi.nlm.nih.gov/genomes/all/GCA/026/538/005/GCA_026538005.1_ASM2653800v1
Cluster 1	GCA_026538085.1	Bacteria;Pseudomonadota;Gammaproteobacteria;Vibrionales;Vibrionaceae;Vibrio;Vibrio parahaemolyticus	Vibrio parahaemolyticus	161761	95.71	2.94	Environment	Scaffold	ftp://ftp.ncbi.nlm.nih.gov/genomes/all/GCA/026/538/085/GCA_026538085.1_ASM2653808v1
Cluster 1	GCA_026538115.1	Bacteria;Pseudomonadota;Gammaproteobacteria;Vibrionales;Vibrionaceae;Vibrio;Vibrio parahaemolyticus	Vibrio parahaemolyticus	172745	97.18	2.83	Animal	Scaffold	ftp://ftp.ncbi.nlm.nih.gov/genomes/all/GCA/026/538/115/GCA_026538115.1_ASM2653811v1
Cluster 1	GCA_026538135.1	Bacteria;Pseudomonadota;Gammaproteobacteria;Vibrionales;Vibrionaceae;Vibrio;Vibrio parahaemolyticus	Vibrio parahaemolyticus	182838	99.79	3.38	Animal	Scaffold	ftp://ftp.ncbi.nlm.nih.gov/genomes/all/GCA/026/538/135/GCA_026538135.1_ASM2653813v1
Cluster 1	GCA_026538205.1	Bacteria;Pseudomonadota;Gammaproteobacteria;Vibrionales;Vibrionaceae;Vibrio;Vibrio parahaemolyticus	Vibrio parahaemolyticus	298193	99.83	1.77	Environment	Scaffold	ftp://ftp.ncbi.nlm.nih.gov/genomes/all/GCA/026/538/205/GCA_026538205.1_ASM2653820v1
Cluster 1	GCA_026538225.1	Bacteria;Pseudomonadota;Gammaproteobacteria;Vibrionales;Vibrionaceae;Vibrio;Vibrio parahaemolyticus	Vibrio parahaemolyticus	193309	98.67	3.75	Environment	Scaffold	ftp://ftp.ncbi.nlm.nih.gov/genomes/all/GCA/026/538/225/GCA_026538225.1_ASM2653822v1
Cluster 1	GCA_026612075.1	Bacteria;Pseudomonadota;Gammaproteobacteria;Enterobacterales;Enterobacteriaceae;Escherichia;Escherichia coli	Escherichia coli	69622	98.23	0.56	Animal	Scaffold	ftp://ftp.ncbi.nlm.nih.gov/genomes/all/GCA/026/612/075/GCA_026612075.1_ASM2661207v1
Cluster 1	GCA_026626145.1	Bacteria;Pseudomonadota;Gammaproteobacteria;Enterobacterales;Enterobacteriaceae;Citrobacter;Citrobacter braakii	Citrobacter braakii	4941235	99.27	3.86	Animal	Completed Genome	ftp://ftp.ncbi.nlm.nih.gov/genomes/all/GCA/026/626/145/GCA_026626145.1_ASM2662614v1
Cluster 1	GCA_026651305.1	Bacteria;Pseudomonadota;Gammaproteobacteria;Aeromonadales;Aeromonadaceae;Aeromonas;Aeromonas caviae	Aeromonas caviae	4583445	99.97	0	Environment	Completed Genome	ftp://ftp.ncbi.nlm.nih.gov/genomes/all/GCA/026/651/305/GCA_026651305.1_ASM2665130v1
Cluster 1	GCA_026651325.1	Bacteria;Pseudomonadota;Gammaproteobacteria;Aeromonadales;Aeromonadaceae;Aeromonas;Aeromonas caviae	Aeromonas caviae	4592740	99.97	0	Environment	Completed Genome	ftp://ftp.ncbi.nlm.nih.gov/genomes/all/GCA/026/651/325/GCA_026651325.1_ASM2665132v1
Cluster 1	GCA_026651345.1	Bacteria;Pseudomonadota;Gammaproteobacteria;Aeromonadales;Aeromonadaceae;Aeromonas;Aeromonas dhakensis	Aeromonas dhakensis	4791622	99.89	0.13	Environment	Completed Genome	ftp://ftp.ncbi.nlm.nih.gov/genomes/all/GCA/026/651/345/GCA_026651345.1_ASM2665134v1
Cluster 1	GCA_026651365.1	Bacteria;Pseudomonadota;Gammaproteobacteria;Aeromonadales;Aeromonadaceae;Aeromonas;Aeromonas dhakensis	Aeromonas dhakensis	4936381	99.96	0.38	Environment	Completed Genome	ftp://ftp.ncbi.nlm.nih.gov/genomes/all/GCA/026/651/365/GCA_026651365.1_ASM2665136v1
Cluster 1	GCA_026651385.1	Bacteria;Pseudomonadota;Gammaproteobacteria;Aeromonadales;Aeromonadaceae;Aeromonas;Aeromonas dhakensis	Aeromonas dhakensis	4772811	99.86	0.32	Environment	Completed Genome	ftp://ftp.ncbi.nlm.nih.gov/genomes/all/GCA/026/651/385/GCA_026651385.1_ASM2665138v1
Cluster 1	GCA_026651405.1	Bacteria;Pseudomonadota;Gammaproteobacteria;Aeromonadales;Aeromonadaceae;Aeromonas;Aeromonas caviae	Aeromonas caviae	4580677	99.97	0	Environment	Completed Genome	ftp://ftp.ncbi.nlm.nih.gov/genomes/all/GCA/026/651/405/GCA_026651405.1_ASM2665140v1
Cluster 1	GCA_026651445.1	Bacteria;Pseudomonadota;Gammaproteobacteria;Aeromonadales;Aeromonadaceae;Aeromonas;Aeromonas hydrophila	Aeromonas hydrophila	4723898	98.13	1.31	Environment	Completed Genome	ftp://ftp.ncbi.nlm.nih.gov/genomes/all/GCA/026/651/445/GCA_026651445.1_ASM2665144v1
Cluster 1	GCA_026651465.1	Bacteria;Pseudomonadota;Gammaproteobacteria;Aeromonadales;Aeromonadaceae;Aeromonas;Aeromonas dhakensis	Aeromonas dhakensis	4907083	99.72	0.49	Environment	Completed Genome	ftp://ftp.ncbi.nlm.nih.gov/genomes/all/GCA/026/651/465/GCA_026651465.1_ASM2665146v1
Cluster 1	GCA_026651485.1	Bacteria;Pseudomonadota;Gammaproteobacteria;Aeromonadales;Aeromonadaceae;Aeromonas;Aeromonas jandaei	Aeromonas jandaei	4534625	98.75	0.27	Environment	Completed Genome	ftp://ftp.ncbi.nlm.nih.gov/genomes/all/GCA/026/651/485/GCA_026651485.1_ASM2665148v1
Cluster 1	GCA_026651525.1	Bacteria;Pseudomonadota;Gammaproteobacteria;Aeromonadales;Aeromonadaceae;Aeromonas;Aeromonas dhakensis	Aeromonas dhakensis	4627193	96.29	0.34	Environment	Completed Genome	ftp://ftp.ncbi.nlm.nih.gov/genomes/all/GCA/026/651/525/GCA_026651525.1_ASM2665152v1
Cluster 1	GCA_026651545.1	Bacteria;Pseudomonadota;Gammaproteobacteria;Aeromonadales;Aeromonadaceae;Aeromonas;Aeromonas hydrophila	Aeromonas hydrophila	4703131	98.3	1.64	Environment	Completed Genome	ftp://ftp.ncbi.nlm.nih.gov/genomes/all/GCA/026/651/545/GCA_026651545.1_ASM2665154v1
Cluster 1	GCA_026703105.1	Bacteria;Pseudomonadota;Gammaproteobacteria;Enterobacterales;Enterobacteriaceae;Klebsiella;Klebsiella pneumoniae	Klebsiella pneumoniae	5300615	98.91	1.89	Human	Scaffold	ftp://ftp.ncbi.nlm.nih.gov/genomes/all/GCA/026/703/105/GCA_026703105.1_ASM2670310v1
Cluster 1	GCA_027270435.1	Bacteria;Pseudomonadota;Gammaproteobacteria;Enterobacterales;Enterobacteriaceae;Citrobacter;Citrobacter sedlakii	Citrobacter sedlakii	385966	99.27	0.55	Human	Scaffold	ftp://ftp.ncbi.nlm.nih.gov/genomes/all/GCA/027/270/435/GCA_027270435.1_ASM2727043v1
Cluster 1	GCA_027276625.1	Bacteria;Pseudomonadota;Gammaproteobacteria;Enterobacterales;Enterobacteriaceae;Escherichia;Escherichia coli	Escherichia coli	382382	99.17	0.62	Environment	Scaffold	ftp://ftp.ncbi.nlm.nih.gov/genomes/all/GCA/027/276/625/GCA_027276625.1_ASM2727662v1
Cluster 1	GCA_027595505.1	Bacteria;Pseudomonadota;Gammaproteobacteria;Enterobacterales;Enterobacteriaceae;Klebsiella;Klebsiella aerogenes	Klebsiella aerogenes	5148259	95.01	2.94	Human	Completed Genome	ftp://ftp.ncbi.nlm.nih.gov/genomes/all/GCA/027/595/505/GCA_027595505.1_ASM2759550v1
Cluster 1	GCA_027667475.1	Bacteria;Pseudomonadota;Gammaproteobacteria;Enterobacterales;Enterobacteriaceae;Enterobacter;Enterobacter kobei	Enterobacter kobei	1141701	99.7	0.47	Human	Scaffold	ftp://ftp.ncbi.nlm.nih.gov/genomes/all/GCA/027/667/475/GCA_027667475.1_ASM2766747v1
Cluster 1	GCA_027668575.1	Bacteria;Pseudomonadota;Gammaproteobacteria;Enterobacterales;Enterobacteriaceae;Escherichia;Escherichia coli	Escherichia coli	102531	97.9	2.43	Human	Scaffold	ftp://ftp.ncbi.nlm.nih.gov/genomes/all/GCA/027/668/575/GCA_027668575.1_ASM2766857v1
Cluster 1	GCA_027673005.1	Bacteria;Pseudomonadota;Gammaproteobacteria;Enterobacterales;Enterobacteriaceae;Enterobacter;Enterobacter kobei	Enterobacter kobei	661860	99.7	0.09	Human	Scaffold	ftp://ftp.ncbi.nlm.nih.gov/genomes/all/GCA/027/673/005/GCA_027673005.1_ASM2767300v1
Cluster 1	GCA_027673335.1	Bacteria;Pseudomonadota;Gammaproteobacteria;Enterobacterales;Enterobacteriaceae;Enterobacter;Enterobacter ludwigii	Enterobacter ludwigii	509089	99.61	1.65	Human	Scaffold	ftp://ftp.ncbi.nlm.nih.gov/genomes/all/GCA/027/673/335/GCA_027673335.1_ASM2767333v1
Cluster 1	GCA_027681085.1	Bacteria;Pseudomonadota;Gammaproteobacteria;Enterobacterales;Enterobacteriaceae;Enterobacter;Enterobacter ludwigii	Enterobacter ludwigii	265318	99.61	2.6	Human	Scaffold	ftp://ftp.ncbi.nlm.nih.gov/genomes/all/GCA/027/681/085/GCA_027681085.1_ASM2768108v1
Cluster 1	GCA_027690795.1	Bacteria;Pseudomonadota;Gammaproteobacteria;Enterobacterales;Enterobacteriaceae;Escherichia;Escherichia coli	Escherichia coli	108053	98.81	0.9	Human	Scaffold	ftp://ftp.ncbi.nlm.nih.gov/genomes/all/GCA/027/690/795/GCA_027690795.1_ASM2769079v1
Cluster 1	GCA_027691445.1	Bacteria;Pseudomonadota;Gammaproteobacteria;Enterobacterales;Enterobacteriaceae;Enterobacter;Enterobacter roggenkampii	Enterobacter roggenkampii	101761	99.71	0.06	Human	Scaffold	ftp://ftp.ncbi.nlm.nih.gov/genomes/all/GCA/027/691/445/GCA_027691445.1_ASM2769144v1
Cluster 1	GCA_027692385.1	Bacteria;Pseudomonadota;Gammaproteobacteria;Enterobacterales;Morganellaceae;Proteus;Proteus mirabilis	Proteus mirabilis	461491	100	0	Human	Scaffold	ftp://ftp.ncbi.nlm.nih.gov/genomes/all/GCA/027/692/385/GCA_027692385.1_ASM2769238v1
Cluster 1	GCA_027694885.1	Bacteria;Pseudomonadota;Gammaproteobacteria;Enterobacterales;Enterobacteriaceae;Citrobacter;Citrobacter freundii	Citrobacter freundii	207912	97.27	2.09	Human	Scaffold	ftp://ftp.ncbi.nlm.nih.gov/genomes/all/GCA/027/694/885/GCA_027694885.1_ASM2769488v1
Cluster 1	GCA_027853315.1	Bacteria;Pseudomonadota;Gammaproteobacteria;Vibrionales;Vibrionaceae;Vibrio;Vibrio metschnikovii	Vibrio metschnikovii	306908	96.98	0.68	Animal	Scaffold	ftp://ftp.ncbi.nlm.nih.gov/genomes/all/GCA/027/853/315/GCA_027853315.1_ASM2785331v1
Cluster 1	GCA_027889475.1	Bacteria;Pseudomonadota;Gammaproteobacteria;Enterobacterales;Enterobacteriaceae;Enterobacter;Enterobacter hormaechei	Enterobacter hormaechei	101282	99.67	0.99	Human	Scaffold	ftp://ftp.ncbi.nlm.nih.gov/genomes/all/GCA/027/889/475/GCA_027889475.1_ASM2788947v1
Cluster 1	GCA_027891305.1	Bacteria;Pseudomonadota;Gammaproteobacteria;Enterobacterales;Enterobacteriaceae;Enterobacter;Enterobacter chuandaensis	Enterobacter chuandaensis	417358	99.38	1.42	Human	Scaffold	ftp://ftp.ncbi.nlm.nih.gov/genomes/all/GCA/027/891/305/GCA_027891305.1_ASM2789130v1
Cluster 1	GCA_027920885.1	Bacteria;Pseudomonadota;Gammaproteobacteria;Enterobacterales;Enterobacteriaceae;Escherichia;Escherichia coli	Escherichia coli	85440	98.91	1.5	Animal	Scaffold	ftp://ftp.ncbi.nlm.nih.gov/genomes/all/GCA/027/920/885/GCA_027920885.1_ASM2792088v1
Cluster 1	GCA_027921665.1	Bacteria;Pseudomonadota;Gammaproteobacteria;Vibrionales;Vibrionaceae;Vibrio;Vibrio cholerae	Vibrio cholerae	173518	96.21	1.32	Environment	Scaffold	ftp://ftp.ncbi.nlm.nih.gov/genomes/all/GCA/027/921/665/GCA_027921665.1_ASM2792166v1
Cluster 1	GCA_027921675.1	Bacteria;Pseudomonadota;Gammaproteobacteria;Vibrionales;Vibrionaceae;Vibrio;Vibrio cholerae	Vibrio cholerae	743145	98.57	1.21	Environment	Scaffold	ftp://ftp.ncbi.nlm.nih.gov/genomes/all/GCA/027/921/675/GCA_027921675.1_ASM2792167v1
Cluster 1	GCA_027921685.1	Bacteria;Pseudomonadota;Gammaproteobacteria;Vibrionales;Vibrionaceae;Vibrio;Vibrio cholerae	Vibrio cholerae	539670	98.74	1.3	Environment	Scaffold	ftp://ftp.ncbi.nlm.nih.gov/genomes/all/GCA/027/921/685/GCA_027921685.1_ASM2792168v1
Cluster 1	GCA_027921725.1	Bacteria;Pseudomonadota;Gammaproteobacteria;Vibrionales;Vibrionaceae;Vibrio;Vibrio cholerae	Vibrio cholerae	248225	99.31	0.96	Environment	Scaffold	ftp://ftp.ncbi.nlm.nih.gov/genomes/all/GCA/027/921/725/GCA_027921725.1_ASM2792172v1
Cluster 1	GCA_028436365.1	Bacteria;Pseudomonadota;Gammaproteobacteria;Enterobacterales;Enterobacteriaceae;Escherichia;Escherichia coli	Escherichia coli	150966	98.43	1	Human	Scaffold	ftp://ftp.ncbi.nlm.nih.gov/genomes/all/GCA/028/436/365/GCA_028436365.1_ASM2843636v1
Cluster 1	GCA_028437595.1	Bacteria;Pseudomonadota;Gammaproteobacteria;Pasteurellales;Pasteurellaceae;Pasteurella;Pasteurella multocida	Pasteurella multocida	202654	97.98	0.21	Animal	Scaffold	ftp://ftp.ncbi.nlm.nih.gov/genomes/all/GCA/028/437/595/GCA_028437595.1_ASM2843759v1
Cluster 1	GCA_028462745.1	Bacteria;Pseudomonadota;Gammaproteobacteria;Enterobacterales;Yersiniaceae;Serratia;Serratia rubidaea	Serratia rubidaea	2527620	99.88	0	Enironment	Scaffold	ftp://ftp.ncbi.nlm.nih.gov/genomes/all/GCA/028/462/745/GCA_028462745.1_ASM2846274v1
Cluster 1	GCA_028486015.1	Bacteria;Pseudomonadota;Gammaproteobacteria;Enterobacterales;Enterobacteriaceae;Escherichia;Escherichia coli	Escherichia coli	87450	99.92	0.11	Animal	Scaffold	ftp://ftp.ncbi.nlm.nih.gov/genomes/all/GCA/028/486/015/GCA_028486015.1_ASM2848601v1
Cluster 1	GCA_028615055.1	Bacteria;Pseudomonadota;Gammaproteobacteria;Vibrionales;Vibrionaceae;Vibrio;Vibrio parahaemolyticus	Vibrio parahaemolyticus	612059	100	3.31	Animal	Scaffold	ftp://ftp.ncbi.nlm.nih.gov/genomes/all/GCA/028/615/055/GCA_028615055.1_ASM2861505v1
Cluster 1	GCA_028615285.1	Bacteria;Pseudomonadota;Gammaproteobacteria;Vibrionales;Vibrionaceae;Vibrio;Vibrio parahaemolyticus	Vibrio parahaemolyticus	451185	100	1.16	Animal	Scaffold	ftp://ftp.ncbi.nlm.nih.gov/genomes/all/GCA/028/615/285/GCA_028615285.1_ASM2861528v1
Cluster 1	GCA_028615335.1	Bacteria;Pseudomonadota;Gammaproteobacteria;Vibrionales;Vibrionaceae;Vibrio;Vibrio parahaemolyticus	Vibrio parahaemolyticus	752950	100	0.64	Animal	Scaffold	ftp://ftp.ncbi.nlm.nih.gov/genomes/all/GCA/028/615/335/GCA_028615335.1_ASM2861533v1
Cluster 1	GCA_028615375.1	Bacteria;Pseudomonadota;Gammaproteobacteria;Vibrionales;Vibrionaceae;Vibrio;Vibrio parahaemolyticus	Vibrio parahaemolyticus	453980	100	2.74	Animal	Scaffold	ftp://ftp.ncbi.nlm.nih.gov/genomes/all/GCA/028/615/375/GCA_028615375.1_ASM2861537v1
Cluster 1	GCA_028615455.1	Bacteria;Pseudomonadota;Gammaproteobacteria;Vibrionales;Vibrionaceae;Vibrio;Vibrio parahaemolyticus	Vibrio parahaemolyticus	386680	100	0	Animal	Scaffold	ftp://ftp.ncbi.nlm.nih.gov/genomes/all/GCA/028/615/455/GCA_028615455.1_ASM2861545v1
Cluster 1	GCA_028615615.1	Bacteria;Pseudomonadota;Gammaproteobacteria;Vibrionales;Vibrionaceae;Vibrio;Vibrio parahaemolyticus	Vibrio parahaemolyticus	404865	100	0.28	Animal	Scaffold	ftp://ftp.ncbi.nlm.nih.gov/genomes/all/GCA/028/615/615/GCA_028615615.1_ASM2861561v1
Cluster 1	GCA_028618635.1	Bacteria;Pseudomonadota;Gammaproteobacteria;Enterobacterales;Enterobacteriaceae;Enterobacter;Enterobacter kobei	Enterobacter kobei	1094149	99.7	0.38	Environment	Scaffold	ftp://ftp.ncbi.nlm.nih.gov/genomes/all/GCA/028/618/635/GCA_028618635.1_ASM2861863v1
Cluster 1	GCA_028767035.1	Bacteria;Pseudomonadota;Gammaproteobacteria;Aeromonadales;Aeromonadaceae;Aeromonas;Aeromonas caviae	Aeromonas caviae	69153	99.97	0	Environment	Scaffold	ftp://ftp.ncbi.nlm.nih.gov/genomes/all/GCA/028/767/035/GCA_028767035.1_ASM2876703v1
Cluster 1	GCA_028884875.1	Bacteria;Pseudomonadota;Gammaproteobacteria;Aeromonadales;Aeromonadaceae;Aeromonas;Aeromonas caviae	Aeromonas caviae	4488138	99.97	0.44	Human	Completed Genome	ftp://ftp.ncbi.nlm.nih.gov/genomes/all/GCA/028/884/875/GCA_028884875.1_ASM2888487v1
Cluster 1	GCA_900020195.1	Bacteria;Pseudomonadota;Gammaproteobacteria;Pasteurellales;Pasteurellaceae;Haemophilus;Haemophilus influenzae	Haemophilus influenzae	175055	99.58	0.02	Human	Scaffold	ftp://ftp.ncbi.nlm.nih.gov/genomes/all/GCA/900/020/195/GCA_900020195.1_14412_4_4
Cluster 1	GCA_900027005.1	Bacteria;Pseudomonadota;Gammaproteobacteria;Pasteurellales;Pasteurellaceae;Haemophilus;Haemophilus influenzae	Haemophilus influenzae	150447	99.37	0.02	Human	Scaffold	ftp://ftp.ncbi.nlm.nih.gov/genomes/all/GCA/900/027/005/GCA_900027005.1_14412_4_18
Cluster 1	GCA_900029335.1	Bacteria;Pseudomonadota;Gammaproteobacteria;Pasteurellales;Pasteurellaceae;Haemophilus;Haemophilus influenzae	Haemophilus influenzae	226568	98.88	0.02	Human	Scaffold	ftp://ftp.ncbi.nlm.nih.gov/genomes/all/GCA/900/029/335/GCA_900029335.1_14412_4_52
Cluster 1	GCA_900034915.1	Bacteria;Pseudomonadota;Gammaproteobacteria;Pasteurellales;Pasteurellaceae;Haemophilus;Haemophilus influenzae	Haemophilus influenzae	193028	99.37	0.02	Human	Scaffold	ftp://ftp.ncbi.nlm.nih.gov/genomes/all/GCA/900/034/915/GCA_900034915.1_14412_4_17
Cluster 1	GCA_900034935.1	Bacteria;Pseudomonadota;Gammaproteobacteria;Pasteurellales;Pasteurellaceae;Haemophilus;Haemophilus influenzae	Haemophilus influenzae	205606	99.81	0.02	Human	Scaffold	ftp://ftp.ncbi.nlm.nih.gov/genomes/all/GCA/900/034/935/GCA_900034935.1_14412_4_32
Cluster 1	GCA_900035525.1	Bacteria;Pseudomonadota;Gammaproteobacteria;Pasteurellales;Pasteurellaceae;Haemophilus;Haemophilus influenzae	Haemophilus influenzae	386886	99.81	0.02	Human	Scaffold	ftp://ftp.ncbi.nlm.nih.gov/genomes/all/GCA/900/035/525/GCA_900035525.1_14412_4_31
Cluster 1	GCA_900074965.1	Bacteria;Pseudomonadota;Gammaproteobacteria;Enterobacterales;Enterobacteriaceae;Enterobacter;Enterobacter hormaechei	Enterobacter hormaechei	170799	99.73	0.57	Human	Scaffold	ftp://ftp.ncbi.nlm.nih.gov/genomes/all/GCA/900/074/965/GCA_900074965.1_11983_6_2
Cluster 1	GCA_900075145.1	Bacteria;Pseudomonadota;Gammaproteobacteria;Enterobacterales;Enterobacteriaceae;Enterobacter;Enterobacter ludwigii	Enterobacter ludwigii	494790	99.27	0.03	Human	Scaffold	ftp://ftp.ncbi.nlm.nih.gov/genomes/all/GCA/900/075/145/GCA_900075145.1_12045_5_62
Cluster 1	GCA_900075165.1	Bacteria;Pseudomonadota;Gammaproteobacteria;Enterobacterales;Enterobacteriaceae;Enterobacter;Enterobacter cloacae	Enterobacter cloacae	224268	99.94	0.46	Human	Scaffold	ftp://ftp.ncbi.nlm.nih.gov/genomes/all/GCA/900/075/165/GCA_900075165.1_11983_7_89
Cluster 1	GCA_900075425.1	Bacteria;Pseudomonadota;Gammaproteobacteria;Enterobacterales;Enterobacteriaceae;Enterobacter;Enterobacter cloacae	Enterobacter cloacae	98878	99.47	0.51	Human	Scaffold	ftp://ftp.ncbi.nlm.nih.gov/genomes/all/GCA/900/075/425/GCA_900075425.1_11983_7_94
Cluster 1	GCA_900075485.1	Bacteria;Pseudomonadota;Gammaproteobacteria;Enterobacterales;Enterobacteriaceae;Enterobacter;Enterobacter cloacae	Enterobacter cloacae	215476	99.87	0.11	Human	Scaffold	ftp://ftp.ncbi.nlm.nih.gov/genomes/all/GCA/900/075/485/GCA_900075485.1_11983_6_11
Cluster 1	GCA_900075565.1	Bacteria;Pseudomonadota;Gammaproteobacteria;Enterobacterales;Enterobacteriaceae;Enterobacter;Enterobacter bugandensis	Enterobacter bugandensis	123753	99.41	0.33	Human	Scaffold	ftp://ftp.ncbi.nlm.nih.gov/genomes/all/GCA/900/075/565/GCA_900075565.1_12082_4_47
Cluster 1	GCA_900075895.1	Bacteria;Pseudomonadota;Gammaproteobacteria;Enterobacterales;Enterobacteriaceae;Enterobacter;Enterobacter hormaechei	Enterobacter hormaechei	106106	99.57	0.29	Human	Scaffold	ftp://ftp.ncbi.nlm.nih.gov/genomes/all/GCA/900/075/895/GCA_900075895.1_11983_6_64
Cluster 1	GCA_900075915.1	Bacteria;Pseudomonadota;Gammaproteobacteria;Enterobacterales;Enterobacteriaceae;Enterobacter;Enterobacter hormaechei	Enterobacter hormaechei	190510	99.43	0.54	Human	Scaffold	ftp://ftp.ncbi.nlm.nih.gov/genomes/all/GCA/900/075/915/GCA_900075915.1_11983_6_66
Cluster 1	GCA_900075935.1	Bacteria;Pseudomonadota;Gammaproteobacteria;Enterobacterales;Enterobacteriaceae;Enterobacter;Enterobacter ludwigii	Enterobacter ludwigii	229677	97.37	0.08	Human	Scaffold	ftp://ftp.ncbi.nlm.nih.gov/genomes/all/GCA/900/075/935/GCA_900075935.1_12082_4_63
Cluster 1	GCA_900075995.1	Bacteria;Pseudomonadota;Gammaproteobacteria;Enterobacterales;Enterobacteriaceae;Enterobacter;Enterobacter hormaechei	Enterobacter hormaechei	183573	99.43	0.77	Human	Scaffold	ftp://ftp.ncbi.nlm.nih.gov/genomes/all/GCA/900/075/995/GCA_900075995.1_11983_6_72
Cluster 1	GCA_900076485.1	Bacteria;Pseudomonadota;Gammaproteobacteria;Enterobacterales;Enterobacteriaceae;Enterobacter;Enterobacter roggenkampii	Enterobacter roggenkampii	151118	99.6	0.86	Human	Scaffold	ftp://ftp.ncbi.nlm.nih.gov/genomes/all/GCA/900/076/485/GCA_900076485.1_12045_5_21
Cluster 1	GCA_900076725.1	Bacteria;Pseudomonadota;Gammaproteobacteria;Enterobacterales;Enterobacteriaceae;Enterobacter;Enterobacter hormaechei	Enterobacter hormaechei	165521	99.71	0.41	Human	Scaffold	ftp://ftp.ncbi.nlm.nih.gov/genomes/all/GCA/900/076/725/GCA_900076725.1_12045_5_44
Cluster 1	GCA_900077005.1	Bacteria;Pseudomonadota;Gammaproteobacteria;Enterobacterales;Enterobacteriaceae;Enterobacter;Enterobacter cloacae	Enterobacter cloacae	234678	99.84	0.77	Human	Scaffold	ftp://ftp.ncbi.nlm.nih.gov/genomes/all/GCA/900/077/005/GCA_900077005.1_12045_5_56
Cluster 1	GCA_900077125.1	Bacteria;Pseudomonadota;Gammaproteobacteria;Enterobacterales;Enterobacteriaceae;Enterobacter;Enterobacter cloacae	Enterobacter cloacae	147983	99.82	1.21	Human	Scaffold	ftp://ftp.ncbi.nlm.nih.gov/genomes/all/GCA/900/077/125/GCA_900077125.1_12045_4_44
Cluster 1	GCA_900077215.1	Bacteria;Pseudomonadota;Gammaproteobacteria;Enterobacterales;Enterobacteriaceae;Enterobacter;Enterobacter cloacae	Enterobacter cloacae	189797	99.09	0.43	Human	Scaffold	ftp://ftp.ncbi.nlm.nih.gov/genomes/all/GCA/900/077/215/GCA_900077215.1_12045_4_52
Cluster 1	GCA_900077305.1	Bacteria;Pseudomonadota;Gammaproteobacteria;Enterobacterales;Enterobacteriaceae;Enterobacter;Enterobacter roggenkampii	Enterobacter roggenkampii	98996	98.88	0.12	Human	Scaffold	ftp://ftp.ncbi.nlm.nih.gov/genomes/all/GCA/900/077/305/GCA_900077305.1_12045_4_1
Cluster 1	GCA_900077345.1	Bacteria;Pseudomonadota;Gammaproteobacteria;Enterobacterales;Enterobacteriaceae;Enterobacter;Enterobacter ludwigii	Enterobacter ludwigii	158439	99.45	0.51	Human	Scaffold	ftp://ftp.ncbi.nlm.nih.gov/genomes/all/GCA/900/077/345/GCA_900077345.1_12045_4_61
Cluster 1	GCA_900077545.1	Bacteria;Pseudomonadota;Gammaproteobacteria;Enterobacterales;Enterobacteriaceae;Enterobacter;Enterobacter cloacae	Enterobacter cloacae	148005	99.91	1.23	Human	Scaffold	ftp://ftp.ncbi.nlm.nih.gov/genomes/all/GCA/900/077/545/GCA_900077545.1_12045_4_77
Cluster 1	GCA_900077675.1	Bacteria;Pseudomonadota;Gammaproteobacteria;Enterobacterales;Enterobacteriaceae;Enterobacter;Enterobacter kobei	Enterobacter kobei	184158	99.53	0.03	Human	Scaffold	ftp://ftp.ncbi.nlm.nih.gov/genomes/all/GCA/900/077/675/GCA_900077675.1_11983_7_6
Cluster 1	GCA_900077785.1	Bacteria;Pseudomonadota;Gammaproteobacteria;Enterobacterales;Enterobacteriaceae;Enterobacter;Enterobacter hormaechei	Enterobacter hormaechei	382504	99.51	0.67	Human	Scaffold	ftp://ftp.ncbi.nlm.nih.gov/genomes/all/GCA/900/077/785/GCA_900077785.1_11983_7_16
Cluster 1	GCA_900078065.1	Bacteria;Pseudomonadota;Gammaproteobacteria;Enterobacterales;Enterobacteriaceae;Enterobacter;Enterobacter hormaechei	Enterobacter hormaechei	349723	99.27	0.63	Human	Scaffold	ftp://ftp.ncbi.nlm.nih.gov/genomes/all/GCA/900/078/065/GCA_900078065.1_11983_7_41
Cluster 1	GCA_900078165.1	Bacteria;Pseudomonadota;Gammaproteobacteria;Enterobacterales;Enterobacteriaceae;Enterobacter;Enterobacter bugandensis	Enterobacter bugandensis	347798	99.5	0.07	Human	Scaffold	ftp://ftp.ncbi.nlm.nih.gov/genomes/all/GCA/900/078/165/GCA_900078165.1_11983_7_53
Cluster 1	GCA_900084595.1	Bacteria;Pseudomonadota;Gammaproteobacteria;Enterobacterales;Enterobacteriaceae;Klebsiella;Klebsiella pneumoniae	Klebsiella pneumoniae	119434	98.47	1.69	Human	Scaffold	ftp://ftp.ncbi.nlm.nih.gov/genomes/all/GCA/900/084/595/GCA_900084595.1_11983_8_82
Cluster 1	GCA_900085135.1	Bacteria;Pseudomonadota;Gammaproteobacteria;Enterobacterales;Enterobacteriaceae;Klebsiella;Klebsiella pneumoniae	Klebsiella pneumoniae	130351	97.98	1.52	Human	Scaffold	ftp://ftp.ncbi.nlm.nih.gov/genomes/all/GCA/900/085/135/GCA_900085135.1_12045_6_83
Cluster 1	GCA_900085655.1	Bacteria;Pseudomonadota;Gammaproteobacteria;Enterobacterales;Enterobacteriaceae;Klebsiella;Klebsiella pneumoniae	Klebsiella pneumoniae	141143	99.89	0.12	Human	Scaffold	ftp://ftp.ncbi.nlm.nih.gov/genomes/all/GCA/900/085/655/GCA_900085655.1_12045_7_54
Cluster 1	GCA_900093055.1	Bacteria;Pseudomonadota;Gammaproteobacteria;Enterobacterales;Enterobacteriaceae;Klebsiella;Klebsiella pneumoniae	Klebsiella pneumoniae	174876	97.82	1.23	Environment	Scaffold	ftp://ftp.ncbi.nlm.nih.gov/genomes/all/GCA/900/093/055/GCA_900093055.1_18090_8_73
Cluster 1	GCA_900172095.1	Bacteria;Pseudomonadota;Gammaproteobacteria;Enterobacterales;Enterobacteriaceae;Klebsiella;Klebsiella pneumoniae	Klebsiella pneumoniae	196108	98.56	2.38	Environment	Scaffold	ftp://ftp.ncbi.nlm.nih.gov/genomes/all/GCA/900/172/095/GCA_900172095.1_16404_3_33
Cluster 1	GCA_900172715.1	Bacteria;Pseudomonadota;Gammaproteobacteria;Enterobacterales;Enterobacteriaceae;Klebsiella;Klebsiella pneumoniae	Klebsiella pneumoniae	160677	99.4	0.96	Environment	Scaffold	ftp://ftp.ncbi.nlm.nih.gov/genomes/all/GCA/900/172/715/GCA_900172715.1_18090_4_65
Cluster 1	GCA_900185995.1	Bacteria;Pseudomonadota;Gammaproteobacteria;Vibrionales;Vibrionaceae;Vibrio;Vibrio cholerae	Vibrio cholerae	2976768	99.98	0.34	Human	Completed Genome	ftp://ftp.ncbi.nlm.nih.gov/genomes/all/GCA/900/185/995/GCA_900185995.1_BK1071
Cluster 1	GCA_900324475.1	Bacteria;Pseudomonadota;Gammaproteobacteria;Enterobacterales;Enterobacteriaceae;Enterobacter;Enterobacter bugandensis	Enterobacter bugandensis	4717613	99.04	0.03	Human	Completed Genome	ftp://ftp.ncbi.nlm.nih.gov/genomes/all/GCA/900/324/475/GCA_900324475.1_EB-247
Cluster 1	GCA_900475535.1	Bacteria;Pseudomonadota;Gammaproteobacteria;Pasteurellales;Pasteurellaceae;Haemophilus;Haemophilus influenzae	Haemophilus influenzae	2044007	98.25	0.47	Human	Completed Genome	ftp://ftp.ncbi.nlm.nih.gov/genomes/all/GCA/900/475/535/GCA_900475535.1_44310_E01
Cluster 1	GCA_900477945.1	Bacteria;Pseudomonadota;Gammaproteobacteria;Pasteurellales;Pasteurellaceae;Haemophilus;Haemophilus haemolyticus	Haemophilus haemolyticus	1934644	97.36	1.57	Human	Completed Genome	ftp://ftp.ncbi.nlm.nih.gov/genomes/all/GCA/900/477/945/GCA_900477945.1_45473_H02
Cluster 1	GCA_900478465.1	Bacteria;Pseudomonadota;Gammaproteobacteria;Enterobacterales;Enterobacteriaceae;Escherichia;Escherichia coli	Escherichia coli	118653	98.72	0.33	Animal	Scaffold	ftp://ftp.ncbi.nlm.nih.gov/genomes/all/GCA/900/478/465/GCA_900478465.1_17261_8_18
Cluster 1	GCA_900478765.1	Bacteria;Pseudomonadota;Gammaproteobacteria;Enterobacterales;Enterobacteriaceae;Escherichia;Escherichia coli	Escherichia coli	274386	99.46	0.38	Animal	Scaffold	ftp://ftp.ncbi.nlm.nih.gov/genomes/all/GCA/900/478/765/GCA_900478765.1_17261_7_25
Cluster 1	GCA_900478905.1	Bacteria;Pseudomonadota;Gammaproteobacteria;Enterobacterales;Enterobacteriaceae;Escherichia;Escherichia coli	Escherichia coli	98709	98.39	0.25	Animal	Scaffold	ftp://ftp.ncbi.nlm.nih.gov/genomes/all/GCA/900/478/905/GCA_900478905.1_17261_7_33
Cluster 1	GCA_900479145.1	Bacteria;Pseudomonadota;Gammaproteobacteria;Enterobacterales;Enterobacteriaceae;Escherichia;Escherichia coli	Escherichia coli	276895	98.89	0.64	Animal	Scaffold	ftp://ftp.ncbi.nlm.nih.gov/genomes/all/GCA/900/479/145/GCA_900479145.1_17261_7_45
Cluster 1	GCA_900479165.1	Bacteria;Pseudomonadota;Gammaproteobacteria;Enterobacterales;Enterobacteriaceae;Escherichia;Escherichia coli	Escherichia coli	127577	98.38	1.74	Animal	Scaffold	ftp://ftp.ncbi.nlm.nih.gov/genomes/all/GCA/900/479/165/GCA_900479165.1_17261_7_39
Cluster 1	GCA_900479555.1	Bacteria;Pseudomonadota;Gammaproteobacteria;Enterobacterales;Enterobacteriaceae;Escherichia;Escherichia coli	Escherichia coli	82619	97.53	0.79	Animal	Scaffold	ftp://ftp.ncbi.nlm.nih.gov/genomes/all/GCA/900/479/555/GCA_900479555.1_17261_7_64
Cluster 1	GCA_900480005.1	Bacteria;Pseudomonadota;Gammaproteobacteria;Enterobacterales;Enterobacteriaceae;Escherichia;Escherichia coli	Escherichia coli	173694	98.61	0.4	Animal	Scaffold	ftp://ftp.ncbi.nlm.nih.gov/genomes/all/GCA/900/480/005/GCA_900480005.1_17261_8_3
Cluster 1	GCA_900482385.1	Bacteria;Pseudomonadota;Gammaproteobacteria;Enterobacterales;Enterobacteriaceae;Escherichia;Escherichia coli	Escherichia coli	78572	99.62	1.06	Animal	Scaffold	ftp://ftp.ncbi.nlm.nih.gov/genomes/all/GCA/900/482/385/GCA_900482385.1_17651_4_84
Cluster 1	GCA_900490205.1	Bacteria;Pseudomonadota;Gammaproteobacteria;Enterobacterales;Enterobacteriaceae;Escherichia;Escherichia coli	Escherichia coli	89631	98.91	0.32	Animal	Scaffold	ftp://ftp.ncbi.nlm.nih.gov/genomes/all/GCA/900/490/205/GCA_900490205.1_17328_2_18
Cluster 1	GCA_900491645.1	Bacteria;Pseudomonadota;Gammaproteobacteria;Aeromonadales;Aeromonadaceae;Aeromonas;Aeromonas caviae	Aeromonas caviae	59728	98.88	1.39	Environment	Scaffold	ftp://ftp.ncbi.nlm.nih.gov/genomes/all/GCA/900/491/645/GCA_900491645.1_ZJ17-2
Cluster 1	GCA_900491675.1	Bacteria;Pseudomonadota;Gammaproteobacteria;Aeromonadales;Aeromonadaceae;Aeromonas;Aeromonas veronii	Aeromonas veronii	119499	98.74	2.18	Human	Scaffold	ftp://ftp.ncbi.nlm.nih.gov/genomes/all/GCA/900/491/675/GCA_900491675.1_ZJ12-3
Cluster 1	GCA_900491695.1	Bacteria;Pseudomonadota;Gammaproteobacteria;Aeromonadales;Aeromonadaceae;Aeromonas;Aeromonas caviae	Aeromonas caviae	75830	99.71	0.16	Environment	Scaffold	ftp://ftp.ncbi.nlm.nih.gov/genomes/all/GCA/900/491/695/GCA_900491695.1_ZJ66-1
Cluster 1	GCA_900493045.1	Bacteria;Pseudomonadota;Gammaproteobacteria;Enterobacterales;Enterobacteriaceae;Klebsiella;Klebsiella pneumoniae	Klebsiella pneumoniae	253916	100	2.55	Human	Scaffold	ftp://ftp.ncbi.nlm.nih.gov/genomes/all/GCA/900/493/045/GCA_900493045.1_22036_6_46
Cluster 1	GCA_900493335.1	Bacteria;Pseudomonadota;Gammaproteobacteria;Enterobacterales;Enterobacteriaceae;Klebsiella;Klebsiella pneumoniae	Klebsiella pneumoniae	379958	100	0.06	Human	Scaffold	ftp://ftp.ncbi.nlm.nih.gov/genomes/all/GCA/900/493/335/GCA_900493335.1_22036_6_63
Cluster 1	GCA_900558935.1	Bacteria;Pseudomonadota;Gammaproteobacteria;Enterobacterales;Enterobacteriaceae;Enterobacter;Enterobacter kobei	Enterobacter kobei	388722	99.7	0.68	Human	Scaffold	ftp://ftp.ncbi.nlm.nih.gov/genomes/all/GCA/900/558/935/GCA_900558935.1_9716_2_73
Cluster 1	GCA_900559105.1	Bacteria;Pseudomonadota;Gammaproteobacteria;Enterobacterales;Enterobacteriaceae;Enterobacter;Enterobacter cloacae	Enterobacter cloacae	478805	99.97	0.58	Human	Scaffold	ftp://ftp.ncbi.nlm.nih.gov/genomes/all/GCA/900/559/105/GCA_900559105.1_9716_2_90
Cluster 1	GCA_900566175.1	Bacteria;Pseudomonadota;Gammaproteobacteria;Enterobacterales;Enterobacteriaceae;Enterobacter;Enterobacter cloacae	Enterobacter cloacae	237178	100	0.38	Human	Scaffold	ftp://ftp.ncbi.nlm.nih.gov/genomes/all/GCA/900/566/175/GCA_900566175.1_9776_7_51
Cluster 1	GCA_900638065.1	Bacteria;Pseudomonadota;Gammaproteobacteria;Enterobacterales;Enterobacteriaceae;Citrobacter;Citrobacter youngae	Citrobacter youngae	4867355	96.07	1.34	Environment	Completed Genome	ftp://ftp.ncbi.nlm.nih.gov/genomes/all/GCA/900/638/065/GCA_900638065.1_55685_A01
Cluster 1	GCA_900638095.1	Bacteria;Pseudomonadota;Gammaproteobacteria;Pasteurellales;Pasteurellaceae;Pasteurella;Pasteurella multocida	Pasteurella multocida	2409583	99.55	0.02	Animal	Completed Genome	ftp://ftp.ncbi.nlm.nih.gov/genomes/all/GCA/900/638/095/GCA_900638095.1_56089_C02
Cluster 1	GCA_900638105.1	Bacteria;Pseudomonadota;Gammaproteobacteria;Pasteurellales;Pasteurellaceae;Haemophilus;Haemophilus influenzae	Haemophilus influenzae	1948880	98.44	0.02	Human	Completed Genome	ftp://ftp.ncbi.nlm.nih.gov/genomes/all/GCA/900/638/105/GCA_900638105.1_56433_A01
Cluster 1	GCA_900638155.1	Bacteria;Pseudomonadota;Gammaproteobacteria;Pasteurellales;Pasteurellaceae;Mannheimia;Mannheimia haemolytica	Mannheimia haemolytica	2335738	99.81	0	Animal	Completed Genome	ftp://ftp.ncbi.nlm.nih.gov/genomes/all/GCA/900/638/155/GCA_900638155.1_56527_B01
Cluster 1	GCA_901001775.1	Bacteria;Pseudomonadota;Gammaproteobacteria;Enterobacterales;Enterobacteriaceae;Klebsiella;Klebsiella pneumoniae	Klebsiella pneumoniae	139270	99.7	1.14	Human	Scaffold	ftp://ftp.ncbi.nlm.nih.gov/genomes/all/GCA/901/001/775/GCA_901001775.1_HAK131
Cluster 1	GCA_902161535.1	Bacteria;Pseudomonadota;Gammaproteobacteria;Enterobacterales;Enterobacteriaceae;Enterobacter;Enterobacter bugandensis	Enterobacter bugandensis	213618	99.5	0.03	Human	Scaffold	ftp://ftp.ncbi.nlm.nih.gov/genomes/all/GCA/902/161/535/GCA_902161535.1_25426_7_289
Cluster 1	GCA_902161715.1	Bacteria;Pseudomonadota;Gammaproteobacteria;Enterobacterales;Enterobacteriaceae;Klebsiella;Klebsiella aerogenes	Klebsiella aerogenes	501523	96.04	1.1	Human	Scaffold	ftp://ftp.ncbi.nlm.nih.gov/genomes/all/GCA/902/161/715/GCA_902161715.1_25426_7_311
Cluster 1	GCA_902161755.1	Bacteria;Pseudomonadota;Gammaproteobacteria;Enterobacterales;Enterobacteriaceae;Klebsiella;Klebsiella aerogenes	Klebsiella aerogenes	729140	96.04	1.1	Human	Scaffold	ftp://ftp.ncbi.nlm.nih.gov/genomes/all/GCA/902/161/755/GCA_902161755.1_25426_7_310
Cluster 1	GCA_902163425.1	Bacteria;Pseudomonadota;Gammaproteobacteria;Enterobacterales;Enterobacteriaceae;Enterobacter;Enterobacter cloacae	Enterobacter cloacae	731395	99.97	0.86	Human	Scaffold	ftp://ftp.ncbi.nlm.nih.gov/genomes/all/GCA/902/163/425/GCA_902163425.1_25964_2_121
Cluster 1	GCA_902166245.1	Bacteria;Pseudomonadota;Gammaproteobacteria;Enterobacterales;Enterobacteriaceae;Enterobacter;Enterobacter hormaechei	Enterobacter hormaechei	303821	99.97	1.02	Human	Scaffold	ftp://ftp.ncbi.nlm.nih.gov/genomes/all/GCA/902/166/245/GCA_902166245.1_26045_1_287
Cluster 1	GCA_904425445.1	Bacteria;Pseudomonadota;Gammaproteobacteria;Enterobacterales;Enterobacteriaceae;Citrobacter;Citrobacter freundii	Citrobacter freundii	5233206	97.21	3.81	Environment	Completed Genome	ftp://ftp.ncbi.nlm.nih.gov/genomes/all/GCA/904/425/445/GCA_904425445.1_ASM90442544v1
Cluster 1	GCA_904425455.1	Bacteria;Pseudomonadota;Gammaproteobacteria;Enterobacterales;Enterobacteriaceae;Enterobacter;Enterobacter cancerogenus	Enterobacter cancerogenus	4813601	99.3	1.29	Environment	Completed Genome	ftp://ftp.ncbi.nlm.nih.gov/genomes/all/GCA/904/425/455/GCA_904425455.1_ASM90442545v1
Cluster 1	GCA_904809695.1	Bacteria;Pseudomonadota;Gammaproteobacteria;Enterobacterales;Enterobacteriaceae;Escherichia;Escherichia coli	Escherichia coli	297377	99.07	1.84	Animal	Scaffold	ftp://ftp.ncbi.nlm.nih.gov/genomes/all/GCA/904/809/695/GCA_904809695.1_27970_1_342
Cluster 1	GCA_904810205.1	Bacteria;Pseudomonadota;Gammaproteobacteria;Enterobacterales;Enterobacteriaceae;Escherichia;Escherichia coli	Escherichia coli	495195	99.49	0.53	Animal	Scaffold	ftp://ftp.ncbi.nlm.nih.gov/genomes/all/GCA/904/810/205/GCA_904810205.1_24742_1_36
Cluster 1	GCA_904842285.1	Bacteria;Pseudomonadota;Gammaproteobacteria;Enterobacterales;Enterobacteriaceae;Escherichia;Escherichia coli	Escherichia coli	460956	99.56	0.47	Animal	Scaffold	ftp://ftp.ncbi.nlm.nih.gov/genomes/all/GCA/904/842/285/GCA_904842285.1_GU769
Cluster 1	GCA_905330125.2	Bacteria;Pseudomonadota;Gammaproteobacteria;Enterobacterales;Enterobacteriaceae;Enterobacter;Enterobacter cloacae	Enterobacter cloacae	4986143	98.78	1.07	Human	Completed Genome	ftp://ftp.ncbi.nlm.nih.gov/genomes/all/GCA/905/330/125/GCA_905330125.2_AI2839v1_cpp
Cluster 1	GCA_905330385.2	Bacteria;Pseudomonadota;Gammaproteobacteria;Enterobacterales;Yersiniaceae;Serratia;Serratia marcescens	Serratia marcescens	5187671	99.81	0	Human	Completed Genome	ftp://ftp.ncbi.nlm.nih.gov/genomes/all/GCA/905/330/385/GCA_905330385.2_AI2872v1_cpp
Cluster 1	GCA_905330515.2	Bacteria;Pseudomonadota;Gammaproteobacteria;Enterobacterales;Yersiniaceae;Serratia;Serratia marcescens	Serratia marcescens	5186895	99.81	0	Human	Completed Genome	ftp://ftp.ncbi.nlm.nih.gov/genomes/all/GCA/905/330/515/GCA_905330515.2_AI2884v1_cpp
Cluster 1	GCA_905331205.2	Bacteria;Pseudomonadota;Gammaproteobacteria;Enterobacterales;Enterobacteriaceae;Enterobacter;Enterobacter cloacae	Enterobacter cloacae	4919202	99.97	1.23	Human	Completed Genome	ftp://ftp.ncbi.nlm.nih.gov/genomes/all/GCA/905/331/205/GCA_905331205.2_AI2983v1_cpp
Cluster 1	GCA_905331265.2	Bacteria;Pseudomonadota;Gammaproteobacteria;Enterobacterales;Enterobacteriaceae;Enterobacter;Enterobacter cloacae	Enterobacter cloacae	4886885	99.31	0.72	Human	Completed Genome	ftp://ftp.ncbi.nlm.nih.gov/genomes/all/GCA/905/331/265/GCA_905331265.2_AI2999v1_cpp
Cluster 1	GCA_905333855.2	Bacteria;Pseudomonadota;Gammaproteobacteria;Enterobacterales;Enterobacteriaceae;Klebsiella;Klebsiella aerogenes	Klebsiella aerogenes	5059556	97.05	2.21	Human	Completed Genome	ftp://ftp.ncbi.nlm.nih.gov/genomes/all/GCA/905/333/855/GCA_905333855.2_AI2913v1_cp
Cluster 1	GCA_905337805.2	Bacteria;Pseudomonadota;Gammaproteobacteria;Enterobacterales;Enterobacteriaceae;Citrobacter;Citrobacter koseri	Citrobacter koseri	4634954	99.88	1.25	Human	Completed Genome	ftp://ftp.ncbi.nlm.nih.gov/genomes/all/GCA/905/337/805/GCA_905337805.2_AN2353v1_cp
Cluster 1	GCA_905338045.2	Bacteria;Pseudomonadota;Gammaproteobacteria;Enterobacterales;Enterobacteriaceae;Citrobacter;Citrobacter freundii	Citrobacter freundii	5085387	96.34	4.97	Human	Completed Genome	ftp://ftp.ncbi.nlm.nih.gov/genomes/all/GCA/905/338/045/GCA_905338045.2_AI3057v1_cp
Cluster 1	GCA_905397475.1	Bacteria;Pseudomonadota;Gammaproteobacteria;Enterobacterales;Enterobacteriaceae;Escherichia;Escherichia coli	Escherichia coli	136803	99.97	0.39	Animal	Scaffold	ftp://ftp.ncbi.nlm.nih.gov/genomes/all/GCA/905/397/475/GCA_905397475.1_B25FEP_s200c20x
Cluster 1	GCA_905397495.1	Bacteria;Pseudomonadota;Gammaproteobacteria;Enterobacterales;Enterobacteriaceae;Escherichia;Escherichia coli	Escherichia coli	147886	99.97	0.66	Animal	Scaffold	ftp://ftp.ncbi.nlm.nih.gov/genomes/all/GCA/905/397/495/GCA_905397495.1_B40FEP_s200c20x
Cluster 1	GCA_905398585.1	Bacteria;Pseudomonadota;Gammaproteobacteria;Enterobacterales;Enterobacteriaceae;Escherichia;Escherichia coli	Escherichia coli	80565	99.67	0.09	Animal	Scaffold	ftp://ftp.ncbi.nlm.nih.gov/genomes/all/GCA/905/398/585/GCA_905398585.1_S50CTX_s200c20x
Cluster 1	GCA_910572575.1	Bacteria;Pseudomonadota;Gammaproteobacteria;Enterobacterales;Enterobacteriaceae;Escherichia;Escherichia coli	Escherichia coli	149424	99.97	0.22	Animal	Scaffold	ftp://ftp.ncbi.nlm.nih.gov/genomes/all/GCA/910/572/575/GCA_910572575.1_F1T3-S2
Cluster 1	GCA_910664785.1	Bacteria;Pseudomonadota;Gammaproteobacteria;Enterobacterales;Enterobacteriaceae;Escherichia;Escherichia coli	Escherichia coli	118777	99.52	0.7	Animal	Chromosome	ftp://ftp.ncbi.nlm.nih.gov/genomes/all/GCA/910/664/785/GCA_910664785.1_B185
Cluster 1	GCA_910664815.1	Bacteria;Pseudomonadota;Gammaproteobacteria;Enterobacterales;Enterobacteriaceae;Escherichia;Escherichia coli	Escherichia coli	152293	97.75	1.55	Animal	Chromosome	ftp://ftp.ncbi.nlm.nih.gov/genomes/all/GCA/910/664/815/GCA_910664815.1_TA054
Cluster 1	GCA_910664845.1	Bacteria;Pseudomonadota;Gammaproteobacteria;Enterobacterales;Enterobacteriaceae;Escherichia;Escherichia coli	Escherichia coli	82720	99.56	0.31	Animal	Chromosome	ftp://ftp.ncbi.nlm.nih.gov/genomes/all/GCA/910/664/845/GCA_910664845.1_B1720
Cluster 1	GCA_910664855.1	Bacteria;Pseudomonadota;Gammaproteobacteria;Enterobacterales;Enterobacteriaceae;Escherichia;Escherichia coli	Escherichia coli	164051	99.26	0.73	Environment	Chromosome	ftp://ftp.ncbi.nlm.nih.gov/genomes/all/GCA/910/664/855/GCA_910664855.1_E101
Cluster 1	GCA_910664935.1	Bacteria;Pseudomonadota;Gammaproteobacteria;Enterobacterales;Enterobacteriaceae;Escherichia;Escherichia coli	Escherichia coli	99416	99.26	0.39	Animal	Chromosome	ftp://ftp.ncbi.nlm.nih.gov/genomes/all/GCA/910/664/935/GCA_910664935.1_TA381
Cluster 1	GCA_910664945.1	Bacteria;Pseudomonadota;Gammaproteobacteria;Enterobacterales;Enterobacteriaceae;Escherichia;Escherichia coli	Escherichia coli	118174	99.49	0.58	Animal	Chromosome	ftp://ftp.ncbi.nlm.nih.gov/genomes/all/GCA/910/664/945/GCA_910664945.1_TA321
Cluster 1	GCA_910664955.1	Bacteria;Pseudomonadota;Gammaproteobacteria;Enterobacterales;Enterobacteriaceae;Escherichia;Escherichia coli	Escherichia coli	85587	98.99	1.1	Animal	Chromosome	ftp://ftp.ncbi.nlm.nih.gov/genomes/all/GCA/910/664/955/GCA_910664955.1_TA159
Cluster 2	GCA_000023005.1	Bacteria;Pseudomonadota;Alphaproteobacteria;Rickettsiales;Rickettsiaceae;Rickettsia;Rickettsia africae	Rickettsia africae ESF-5	1278540	98.83	0.23	Animal	Completed Genome	ftp://ftp.ncbi.nlm.nih.gov/genomes/all/GCA/000/023/005/GCA_000023005.1_ASM2300v1
Cluster 2	GCA_000158615.1	Bacteria;Pseudomonadota;Betaproteobacteria;Neisseriales;Neisseriaceae;Eikenella;Eikenella corrodens	Eikenella corrodens ATCC 23834	61747	95.58	0.56	Human	Scaffold	ftp://ftp.ncbi.nlm.nih.gov/genomes/all/GCA/000/158/615/GCA_000158615.1_ASM15861v1
Cluster 2	GCA_000164035.1	Bacteria;Pseudomonadota;Betaproteobacteria;Burkholderiales;Alcaligenaceae;Achromobacter;Achromobacter piechaudii	Achromobacter piechaudii ATCC 43553	89557	98.41	2.04	Human	Scaffold	ftp://ftp.ncbi.nlm.nih.gov/genomes/all/GCA/000/164/035/GCA_000164035.1_ASM16403v1
Cluster 2	GCA_000186165.1	Bacteria;Pseudomonadota;Betaproteobacteria;Neisseriales;Neisseriaceae;Neisseria;Neisseria mucosa	Neisseria mucosa C102	252431	98.84	0.4	Human	Scaffold	ftp://ftp.ncbi.nlm.nih.gov/genomes/all/GCA/000/186/165/GCA_000186165.1_Neis_muco_C102_V1
Cluster 2	GCA_000192725.1	Bacteria;Pseudomonadota;Alphaproteobacteria;Hyphomicrobiales;Brucellaceae;Brucella;Brucella melitensis	Brucella melitensis M28	2126133	99.45	0.76	Animal	Completed Genome	ftp://ftp.ncbi.nlm.nih.gov/genomes/all/GCA/000/192/725/GCA_000192725.1_ASM19272v1
Cluster 2	GCA_000193475.1	Bacteria;Pseudomonadota;Betaproteobacteria;Burkholderiales;Burkholderiaceae;Burkholderia;Burkholderia pseudomallei	Burkholderia pseudomallei 1106b	336961	99.89	0.17	Human	Chromosome	ftp://ftp.ncbi.nlm.nih.gov/genomes/all/GCA/000/193/475/GCA_000193475.1_ASM19347v1
Cluster 2	GCA_000194925.1	Bacteria;Pseudomonadota;Betaproteobacteria;Neisseriales;Neisseriaceae;Neisseria;Neisseria bacilliformis	Neisseria bacilliformis ATCC BAA-1200	80283	97.31	0.8	Human	Scaffold	ftp://ftp.ncbi.nlm.nih.gov/genomes/all/GCA/000/194/925/GCA_000194925.1_ASM19492v1
Cluster 2	GCA_000221205.1	Bacteria;Pseudomonadota;Alphaproteobacteria;Rickettsiales;Rickettsiaceae;Rickettsia;Rickettsia conorii	Rickettsia conorii subsp. heilongjiangensis 054	1278471	99.7	0.23	Animal	Completed Genome	ftp://ftp.ncbi.nlm.nih.gov/genomes/all/GCA/000/221/205/GCA_000221205.1_ASM22120v1
Cluster 2	GCA_000251205.1	Bacteria;Pseudomonadota;Alphaproteobacteria;Hyphomicrobiales;Brucellaceae;Brucella;Brucella anthropi	Brucella anthropi CTS-325	316618	100	0	Environment	Scaffold	ftp://ftp.ncbi.nlm.nih.gov/genomes/all/GCA/000/251/205/GCA_000251205.1_ASM25120v1
Cluster 2	GCA_000292915.1	Bacteria;Pseudomonadota;Betaproteobacteria;Burkholderiales;Burkholderiaceae;Burkholderia;Burkholderia cepacia	Burkholderia cepacia GG4	3463655	99.9	0.6	Environment	Completed Genome	ftp://ftp.ncbi.nlm.nih.gov/genomes/all/GCA/000/292/915/GCA_000292915.1_ASM29291v1
Cluster 2	GCA_000294715.1	Bacteria;Pseudomonadota;Alphaproteobacteria;Hyphomicrobiales;Bartonellaceae;Bartonella;Bartonella quintana	Bartonella quintana RM-11	1587646	97.9	0	Animal	Completed Genome	ftp://ftp.ncbi.nlm.nih.gov/genomes/all/GCA/000/294/715/GCA_000294715.1_ASM29471v1
Cluster 2	GCA_000341355.1	Bacteria;Pseudomonadota;Alphaproteobacteria;Hyphomicrobiales;Bartonellaceae;Bartonella;Bartonella australis	Bartonella australis AUST/NH1	1596490	99.94	0	Animal	Completed Genome	ftp://ftp.ncbi.nlm.nih.gov/genomes/all/GCA/000/341/355/GCA_000341355.1_ASM34135v1
Cluster 2	GCA_000341385.1	Bacteria;Pseudomonadota;Alphaproteobacteria;Hyphomicrobiales;Bartonellaceae;Bartonella;Bartonella vinsonii	Bartonella vinsonii subsp. berkhoffii str. Winnie	1802699	98.93	1.56	Animal	Completed Genome	ftp://ftp.ncbi.nlm.nih.gov/genomes/all/GCA/000/341/385/GCA_000341385.1_ASM34138v1
Cluster 2	GCA_000473485.1	Bacteria;Pseudomonadota;Betaproteobacteria;Burkholderiales;Burkholderiaceae;Burkholderia;Burkholderia cepacia	Burkholderia cepacia ATCC 25416	369461	100	0.4	Enironment	Scaffold	ftp://ftp.ncbi.nlm.nih.gov/genomes/all/GCA/000/473/485/GCA_000473485.1_ASM47348v1
Cluster 2	GCA_000497165.1	Bacteria;Pseudomonadota;Betaproteobacteria;Burkholderiales;Burkholderiaceae;Burkholderia;Burkholderia dolosa	Burkholderia dolosa PC543	196616	99.1	0.14	Human	Chromosome	ftp://ftp.ncbi.nlm.nih.gov/genomes/all/GCA/000/497/165/GCA_000497165.1_Bdolosa1.0
Cluster 2	GCA_000516675.1	Bacteria;Pseudomonadota;Alphaproteobacteria;Hyphomicrobiales;Bartonellaceae;Bartonella;Bartonella henselae	Bartonella henselae JK 51	574004	99.95	0.13	Animal	Scaffold	ftp://ftp.ncbi.nlm.nih.gov/genomes/all/GCA/000/516/675/GCA_000516675.1_Bart_hens_JK_51_V1
Cluster 2	GCA_000516755.1	Bacteria;Pseudomonadota;Alphaproteobacteria;Hyphomicrobiales;Bartonellaceae;Bartonella;Bartonella quintana	Bartonella quintana BQ2-D70	887307	97.9	0.04	Animal	Scaffold	ftp://ftp.ncbi.nlm.nih.gov/genomes/all/GCA/000/516/755/GCA_000516755.1_Bart_quin_BQ2-D70_V1
Cluster 2	GCA_000524575.1	Bacteria;Pseudomonadota;Gammaproteobacteria;Thiotrichales;Francisellaceae;Francisella;Francisella tularensis	Francisella tularensis subsp. holarctica PHIT-FT049	1881193	99.24	0	Environment	Completed Genome	ftp://ftp.ncbi.nlm.nih.gov/genomes/all/GCA/000/524/575/GCA_000524575.1_ASM52457v1
Cluster 2	GCA_000586115.1	Bacteria;Pseudomonadota;Gammaproteobacteria;Legionellales;Legionellaceae;Legionella;Legionella pneumophila	Legionella pneumophila subsp. pneumophila	219408	99.29	0.3	Human	Scaffold	ftp://ftp.ncbi.nlm.nih.gov/genomes/all/GCA/000/586/115/GCA_000586115.1_ATCC_43290
Cluster 2	GCA_000586155.1	Bacteria;Pseudomonadota;Gammaproteobacteria;Legionellales;Legionellaceae;Legionella;Legionella pneumophila	Legionella pneumophila subsp. pneumophila	170676	99.11	0.46	Human	Scaffold	ftp://ftp.ncbi.nlm.nih.gov/genomes/all/GCA/000/586/155/GCA_000586155.1_ATCC_43130
Cluster 2	GCA_000586195.1	Bacteria;Pseudomonadota;Gammaproteobacteria;Legionellales;Legionellaceae;Legionella;Legionella pneumophila	Legionella pneumophila subsp. fraseri	96635	95.02	1.14	Human	Scaffold	ftp://ftp.ncbi.nlm.nih.gov/genomes/all/GCA/000/586/195/GCA_000586195.1_ATCC_35251
Cluster 2	GCA_000586215.1	Bacteria;Pseudomonadota;Gammaproteobacteria;Legionellales;Legionellaceae;Legionella;Legionella pneumophila	Legionella pneumophila subsp. pneumophila	94637	98.51	0.79	Human	Scaffold	ftp://ftp.ncbi.nlm.nih.gov/genomes/all/GCA/000/586/215/GCA_000586215.1_ATCC_35096
Cluster 2	GCA_000586255.1	Bacteria;Pseudomonadota;Gammaproteobacteria;Legionellales;Legionellaceae;Legionella;Legionella pneumophila	Legionella pneumophila subsp. pascullei	337295	97.24	0.52	Environment	Scaffold	ftp://ftp.ncbi.nlm.nih.gov/genomes/all/GCA/000/586/255/GCA_000586255.1_ATCC_33737
Cluster 2	GCA_000586335.1	Bacteria;Pseudomonadota;Gammaproteobacteria;Legionellales;Legionellaceae;Legionella;Legionella pneumophila	Legionella pneumophila subsp. pneumophila	151693	98.78	0.46	Environment	Scaffold	ftp://ftp.ncbi.nlm.nih.gov/genomes/all/GCA/000/586/335/GCA_000586335.1_ATCC_33155
Cluster 2	GCA_000586355.1	Bacteria;Pseudomonadota;Gammaproteobacteria;Legionellales;Legionellaceae;Legionella;Legionella pneumophila	Legionella pneumophila subsp. pneumophila	169339	97.11	0.25	Human	Scaffold	ftp://ftp.ncbi.nlm.nih.gov/genomes/all/GCA/000/586/355/GCA_000586355.1_ATCC_33154
Cluster 2	GCA_000607205.1	Bacteria;Pseudomonadota;Alphaproteobacteria;Hyphomicrobiales;Bartonellaceae;Bartonella;Bartonella bacilliformis	Bartonella bacilliformis San Pedro600-02	812081	95.22	0.77	Human	Scaffold	ftp://ftp.ncbi.nlm.nih.gov/genomes/all/GCA/000/607/205/GCA_000607205.1_Bart_baci_San_Pedro600-02_V1
Cluster 2	GCA_000626595.1	Bacteria;Pseudomonadota;Betaproteobacteria;Neisseriales;Neisseriaceae;Neisseria;Neisseria meningitidis	Neisseria meningitidis	2188020	99.02	0.15	Human	Completed Genome	ftp://ftp.ncbi.nlm.nih.gov/genomes/all/GCA/000/626/595/GCA_000626595.1_ASM62659v1
Cluster 2	GCA_000632815.1	Bacteria;Pseudomonadota;Alphaproteobacteria;Rickettsiales;Anaplasmataceae;Ehrlichia;Ehrlichia chaffeensis	Ehrlichia chaffeensis str. Heartland	1172721	99.34	0.25	Human	Completed Genome	ftp://ftp.ncbi.nlm.nih.gov/genomes/all/GCA/000/632/815/GCA_000632815.1_ASM63281v1
Cluster 2	GCA_000689635.2	Bacteria;Pseudomonadota;Alphaproteobacteria;Rickettsiales;Anaplasmataceae;Anaplasma;Anaplasma phagocytophilum	Anaplasma phagocytophilum str. Norway variant2	1545197	98.98	2.73	Animal	Completed Genome	ftp://ftp.ncbi.nlm.nih.gov/genomes/all/GCA/000/689/635/GCA_000689635.2_ASM68963v2
Cluster 2	GCA_000701165.2	Bacteria;Pseudomonadota;Betaproteobacteria;Burkholderiales;Burkholderiaceae;Burkholderia;Burkholderia cepacia	Burkholderia cepacia JBK9	3400736	99.62	3.85	Environment	Completed Genome	ftp://ftp.ncbi.nlm.nih.gov/genomes/all/GCA/000/701/165/GCA_000701165.2_ASM70116v2
Cluster 2	GCA_000709795.1	Bacteria;Pseudomonadota;Alphaproteobacteria;Hyphomicrobiales;Bartonellaceae;Bartonella;Bartonella bacilliformis	Bartonella bacilliformis Ver097	368475	95.52	0.31	Human	Scaffold	ftp://ftp.ncbi.nlm.nih.gov/genomes/all/GCA/000/709/795/GCA_000709795.1_Bart_baci_Ver097_V1
Cluster 2	GCA_000742085.1	Bacteria;Pseudomonadota;Gammaproteobacteria;Thiotrichales;Francisellaceae;Francisella;Francisella tularensis	Francisella tularensis subsp. novicida	223353	99.82	0.14	Environment	Scaffold	ftp://ftp.ncbi.nlm.nih.gov/genomes/all/GCA/000/742/085/GCA_000742085.1_ASM74208v1
Cluster 2	GCA_000756845.1	Bacteria;Pseudomonadota;Betaproteobacteria;Burkholderiales;Burkholderiaceae;Burkholderia;Burkholderia cepacia	Burkholderia cepacia	2068068	99.87	0.87	Environment	Scaffold	ftp://ftp.ncbi.nlm.nih.gov/genomes/all/GCA/000/756/845/GCA_000756845.1_BHW_1
Cluster 2	GCA_000756855.1	Bacteria;Pseudomonadota;Betaproteobacteria;Burkholderiales;Burkholderiaceae;Burkholderia;Burkholderia gladioli	Burkholderia gladioli	2105549	99.3	2.3	Enironment	Scaffold	ftp://ftp.ncbi.nlm.nih.gov/genomes/all/GCA/000/756/855/GCA_000756855.1_BGC
Cluster 2	GCA_000757585.1	Bacteria;Pseudomonadota;Betaproteobacteria;Burkholderiales;Burkholderiaceae;Burkholderia;Burkholderia gladioli	Burkholderia gladioli	148354	99.95	2.3	Enironment	Scaffold	ftp://ftp.ncbi.nlm.nih.gov/genomes/all/GCA/000/757/585/GCA_000757585.1_ASM75758v1
Cluster 2	GCA_000787195.2	Bacteria;Pseudomonadota;Betaproteobacteria;Neisseriales;Neisseriaceae;Neisseria;Neisseria meningitidis	Neisseria meningitidis	2173191	97.59	0.15	Human	Completed Genome	ftp://ftp.ncbi.nlm.nih.gov/genomes/all/GCA/000/787/195/GCA_000787195.2_ASM78719v2
Cluster 2	GCA_000816165.1	Bacteria;Pseudomonadota;Betaproteobacteria;Neisseriales;Neisseriaceae;Neisseria;Neisseria meningitidis	Neisseria meningitidis LNP21362	2139957	96.6	0.62	Human	Completed Genome	ftp://ftp.ncbi.nlm.nih.gov/genomes/all/GCA/000/816/165/GCA_000816165.1_ASM81616v1
Cluster 2	GCA_000823305.1	Bacteria;Pseudomonadota;Gammaproteobacteria;Legionellales;Legionellaceae;Legionella;Legionella pneumophila	Legionella pneumophila	76402	97.35	0.25	Human	Scaffold	ftp://ftp.ncbi.nlm.nih.gov/genomes/all/GCA/000/823/305/GCA_000823305.1_12_3965
Cluster 2	GCA_000823325.1	Bacteria;Pseudomonadota;Gammaproteobacteria;Legionellales;Legionellaceae;Legionella;Legionella pneumophila	Legionella pneumophila	108268	98	0.25	Human	Scaffold	ftp://ftp.ncbi.nlm.nih.gov/genomes/all/GCA/000/823/325/GCA_000823325.1_12_4030
Cluster 2	GCA_000823805.1	Bacteria;Pseudomonadota;Gammaproteobacteria;Legionellales;Legionellaceae;Legionella;Legionella pneumophila	Legionella pneumophila	67254	98.68	0.73	Human	Scaffold	ftp://ftp.ncbi.nlm.nih.gov/genomes/all/GCA/000/823/805/GCA_000823805.1_HO4020049
Cluster 2	GCA_000959365.1	Bacteria;Pseudomonadota;Betaproteobacteria;Burkholderiales;Burkholderiaceae;Burkholderia;Burkholderia oklahomensis	Burkholderia oklahomensis C6786	4132035	100	0.77	Human	Completed Genome	ftp://ftp.ncbi.nlm.nih.gov/genomes/all/GCA/000/959/365/GCA_000959365.1_ASM95936v1
Cluster 2	GCA_000967305.2	Bacteria;Pseudomonadota;Betaproteobacteria;Burkholderiales;Alcaligenaceae;Alcaligenes;Alcaligenes faecalis	Alcaligenes faecalis	4233756	96.25	3.2	Animal	Completed Genome	ftp://ftp.ncbi.nlm.nih.gov/genomes/all/GCA/000/967/305/GCA_000967305.2_ASM96730v2
Cluster 2	GCA_001060175.1	Bacteria;Pseudomonadota;Betaproteobacteria;Neisseriales;Neisseriaceae;Neisseria;Neisseria meningitidis	Neisseria meningitidis	83526	99.92	0	Human	Scaffold	ftp://ftp.ncbi.nlm.nih.gov/genomes/all/GCA/001/060/175/GCA_001060175.1_ASM106017v1
Cluster 2	GCA_001061215.1	Bacteria;Pseudomonadota;Betaproteobacteria;Neisseriales;Neisseriaceae;Neisseria;Neisseria meningitidis	Neisseria meningitidis	70653	100	0.11	Human	Scaffold	ftp://ftp.ncbi.nlm.nih.gov/genomes/all/GCA/001/061/215/GCA_001061215.1_ASM106121v1
Cluster 2	GCA_001063405.1	Bacteria;Pseudomonadota;Betaproteobacteria;Neisseriales;Neisseriaceae;Neisseria;Neisseria meningitidis	Neisseria meningitidis	161372	99.7	0	Human	Scaffold	ftp://ftp.ncbi.nlm.nih.gov/genomes/all/GCA/001/063/405/GCA_001063405.1_ASM106340v1
Cluster 2	GCA_001063965.1	Bacteria;Pseudomonadota;Betaproteobacteria;Neisseriales;Neisseriaceae;Neisseria;Neisseria bacilliformis	Neisseria bacilliformis	55140	97.64	0.96	Human	Scaffold	ftp://ftp.ncbi.nlm.nih.gov/genomes/all/GCA/001/063/965/GCA_001063965.1_ASM106396v1
Cluster 2	GCA_001064635.1	Bacteria;Pseudomonadota;Betaproteobacteria;Neisseriales;Neisseriaceae;Neisseria;Neisseria meningitidis	Neisseria meningitidis	76946	100	0	Human	Scaffold	ftp://ftp.ncbi.nlm.nih.gov/genomes/all/GCA/001/064/635/GCA_001064635.1_ASM106463v1
Cluster 2	GCA_001067315.1	Bacteria;Pseudomonadota;Betaproteobacteria;Neisseriales;Neisseriaceae;Neisseria;Neisseria meningitidis	Neisseria meningitidis	62097	99.7	0	Human	Scaffold	ftp://ftp.ncbi.nlm.nih.gov/genomes/all/GCA/001/067/315/GCA_001067315.1_ASM106731v1
Cluster 2	GCA_001067535.1	Bacteria;Pseudomonadota;Betaproteobacteria;Neisseriales;Neisseriaceae;Neisseria;Neisseria meningitidis	Neisseria meningitidis	72689	99.92	0.34	Human	Scaffold	ftp://ftp.ncbi.nlm.nih.gov/genomes/all/GCA/001/067/535/GCA_001067535.1_ASM106753v1
Cluster 2	GCA_001068765.1	Bacteria;Pseudomonadota;Gammaproteobacteria;Xanthomonadales;Xanthomonadaceae;Stenotrophomonas;Stenotrophomonas maltophilia	Stenotrophomonas maltophilia	85750	98.65	0.83	Human	Scaffold	ftp://ftp.ncbi.nlm.nih.gov/genomes/all/GCA/001/068/765/GCA_001068765.1_ASM106876v1
Cluster 2	GCA_001068915.1	Bacteria;Pseudomonadota;Gammaproteobacteria;Xanthomonadales;Xanthomonadaceae;Stenotrophomonas;Stenotrophomonas maltophilia	Stenotrophomonas maltophilia	92309	100	0.34	Human	Scaffold	ftp://ftp.ncbi.nlm.nih.gov/genomes/all/GCA/001/068/915/GCA_001068915.1_ASM106891v1
Cluster 2	GCA_001069645.1	Bacteria;Pseudomonadota;Gammaproteobacteria;Xanthomonadales;Xanthomonadaceae;Stenotrophomonas;Stenotrophomonas maltophilia	Stenotrophomonas maltophilia	116840	98.49	1.36	Human	Scaffold	ftp://ftp.ncbi.nlm.nih.gov/genomes/all/GCA/001/069/645/GCA_001069645.1_ASM106964v1
Cluster 2	GCA_001070865.1	Bacteria;Pseudomonadota;Gammaproteobacteria;Xanthomonadales;Xanthomonadaceae;Stenotrophomonas;Stenotrophomonas maltophilia	Stenotrophomonas maltophilia	72990	98.22	1.36	Human	Scaffold	ftp://ftp.ncbi.nlm.nih.gov/genomes/all/GCA/001/070/865/GCA_001070865.1_ASM107086v1
Cluster 2	GCA_001071045.1	Bacteria;Pseudomonadota;Gammaproteobacteria;Xanthomonadales;Xanthomonadaceae;Stenotrophomonas;Stenotrophomonas maltophilia	Stenotrophomonas maltophilia	162454	98.46	1.28	Human	Scaffold	ftp://ftp.ncbi.nlm.nih.gov/genomes/all/GCA/001/071/045/GCA_001071045.1_ASM107104v1
Cluster 2	GCA_001071065.1	Bacteria;Pseudomonadota;Gammaproteobacteria;Xanthomonadales;Xanthomonadaceae;Stenotrophomonas;Stenotrophomonas maltophilia	Stenotrophomonas maltophilia	84890	97.95	1.34	Human	Scaffold	ftp://ftp.ncbi.nlm.nih.gov/genomes/all/GCA/001/071/065/GCA_001071065.1_ASM107106v1
Cluster 2	GCA_001071115.1	Bacteria;Pseudomonadota;Gammaproteobacteria;Xanthomonadales;Xanthomonadaceae;Stenotrophomonas;Stenotrophomonas maltophilia	Stenotrophomonas maltophilia	166177	98.99	0.36	Human	Scaffold	ftp://ftp.ncbi.nlm.nih.gov/genomes/all/GCA/001/071/115/GCA_001071115.1_ASM107111v1
Cluster 2	GCA_001071175.1	Bacteria;Pseudomonadota;Gammaproteobacteria;Xanthomonadales;Xanthomonadaceae;Stenotrophomonas;Stenotrophomonas maltophilia	Stenotrophomonas maltophilia	51632	97.42	1.06	Human	Scaffold	ftp://ftp.ncbi.nlm.nih.gov/genomes/all/GCA/001/071/175/GCA_001071175.1_ASM107117v1
Cluster 2	GCA_001071195.1	Bacteria;Pseudomonadota;Gammaproteobacteria;Xanthomonadales;Xanthomonadaceae;Stenotrophomonas;Stenotrophomonas maltophilia	Stenotrophomonas maltophilia	73771	100	0.34	Human	Scaffold	ftp://ftp.ncbi.nlm.nih.gov/genomes/all/GCA/001/071/195/GCA_001071195.1_ASM107119v1
Cluster 2	GCA_001071285.1	Bacteria;Pseudomonadota;Gammaproteobacteria;Xanthomonadales;Xanthomonadaceae;Stenotrophomonas;Stenotrophomonas maltophilia	Stenotrophomonas maltophilia	69913	99.83	0	Human	Scaffold	ftp://ftp.ncbi.nlm.nih.gov/genomes/all/GCA/001/071/285/GCA_001071285.1_ASM107128v1
Cluster 2	GCA_001071655.1	Bacteria;Pseudomonadota;Gammaproteobacteria;Xanthomonadales;Xanthomonadaceae;Stenotrophomonas;Stenotrophomonas maltophilia	Stenotrophomonas maltophilia	110097	98.56	0.47	Human	Scaffold	ftp://ftp.ncbi.nlm.nih.gov/genomes/all/GCA/001/071/655/GCA_001071655.1_ASM107165v1
Cluster 2	GCA_001071815.1	Bacteria;Pseudomonadota;Gammaproteobacteria;Xanthomonadales;Xanthomonadaceae;Stenotrophomonas;Stenotrophomonas maltophilia	Stenotrophomonas maltophilia	210318	98.84	0.6	Human	Scaffold	ftp://ftp.ncbi.nlm.nih.gov/genomes/all/GCA/001/071/815/GCA_001071815.1_ASM107181v1
Cluster 2	GCA_001072195.1	Bacteria;Pseudomonadota;Gammaproteobacteria;Xanthomonadales;Xanthomonadaceae;Stenotrophomonas;Stenotrophomonas maltophilia	Stenotrophomonas maltophilia	204025	100	0.07	Human	Scaffold	ftp://ftp.ncbi.nlm.nih.gov/genomes/all/GCA/001/072/195/GCA_001072195.1_ASM107219v1
Cluster 2	GCA_001073045.1	Bacteria;Pseudomonadota;Gammaproteobacteria;Xanthomonadales;Xanthomonadaceae;Stenotrophomonas;Stenotrophomonas maltophilia	Stenotrophomonas maltophilia	243432	98.49	1.28	Human	Scaffold	ftp://ftp.ncbi.nlm.nih.gov/genomes/all/GCA/001/073/045/GCA_001073045.1_ASM107304v1
Cluster 2	GCA_001073225.1	Bacteria;Pseudomonadota;Gammaproteobacteria;Xanthomonadales;Xanthomonadaceae;Stenotrophomonas;Stenotrophomonas maltophilia	Stenotrophomonas maltophilia	56962	98.68	0.99	Human	Scaffold	ftp://ftp.ncbi.nlm.nih.gov/genomes/all/GCA/001/073/225/GCA_001073225.1_ASM107322v1
Cluster 2	GCA_001084685.1	Bacteria;Pseudomonadota;Betaproteobacteria;Neisseriales;Neisseriaceae;Neisseria;Neisseria gonorrhoeae	Neisseria gonorrhoeae	59183	99.82	0.42	Human	Scaffold	ftp://ftp.ncbi.nlm.nih.gov/genomes/all/GCA/001/084/685/GCA_001084685.1_8727_5_51
Cluster 2	GCA_001183095.1	Bacteria;Pseudomonadota;Betaproteobacteria;Neisseriales;Neisseriaceae;Neisseria;Neisseria meningitidis	Neisseria meningitidis	50980	99.02	0.21	Human	Scaffold	ftp://ftp.ncbi.nlm.nih.gov/genomes/all/GCA/001/183/095/GCA_001183095.1_Nm220601
Cluster 2	GCA_001274595.1	Bacteria;Pseudomonadota;Gammaproteobacteria;Xanthomonadales;Xanthomonadaceae;Stenotrophomonas;Stenotrophomonas maltophilia	Stenotrophomonas maltophilia	4804002	97.42	1.89	Human	Completed Genome	ftp://ftp.ncbi.nlm.nih.gov/genomes/all/GCA/001/274/595/GCA_001274595.1_ASM127459v1
Cluster 2	GCA_001274655.1	Bacteria;Pseudomonadota;Gammaproteobacteria;Xanthomonadales;Xanthomonadaceae;Stenotrophomonas;Stenotrophomonas maltophilia	Stenotrophomonas maltophilia	4509724	98.43	0.27	Human	Completed Genome	ftp://ftp.ncbi.nlm.nih.gov/genomes/all/GCA/001/274/655/GCA_001274655.1_ASM127465v1
Cluster 2	GCA_001274675.1	Bacteria;Pseudomonadota;Gammaproteobacteria;Xanthomonadales;Xanthomonadaceae;Stenotrophomonas;Stenotrophomonas maltophilia	Stenotrophomonas maltophilia	4509724	98.43	0.27	Human	Completed Genome	ftp://ftp.ncbi.nlm.nih.gov/genomes/all/GCA/001/274/675/GCA_001274675.1_ASM127467v1
Cluster 2	GCA_001298835.1	Bacteria;Pseudomonadota;Betaproteobacteria;Burkholderiales;Alcaligenaceae;Achromobacter;Achromobacter ruhlandii	Achromobacter ruhlandii	82827	99.13	1.06	Human	Scaffold	ftp://ftp.ncbi.nlm.nih.gov/genomes/all/GCA/001/298/835/GCA_001298835.1_11861_6_7
Cluster 2	GCA_001307525.1	Bacteria;Pseudomonadota;Betaproteobacteria;Burkholderiales;Alcaligenaceae;Bordetella;Bordetella pertussis	Bordetella pertussis	4101147	97.28	0.58	Human	Completed Genome	ftp://ftp.ncbi.nlm.nih.gov/genomes/all/GCA/001/307/525/GCA_001307525.1_ASM130752v1
Cluster 2	GCA_001458475.1	Bacteria;Pseudomonadota;Betaproteobacteria;Neisseriales;Neisseriaceae;Kingella;Kingella kingae	Kingella kingae	2140065	98.87	0.68	Human	Completed Genome	ftp://ftp.ncbi.nlm.nih.gov/genomes/all/GCA/001/458/475/GCA_001458475.1_KKKWG1
Cluster 2	GCA_001467045.1	Bacteria;Pseudomonadota;Gammaproteobacteria;Legionellales;Legionellaceae;Legionella;Legionella bozemanae	Fluoribacter bozemanae	110810	99.84	0.46	Human	Scaffold	ftp://ftp.ncbi.nlm.nih.gov/genomes/all/GCA/001/467/045/GCA_001467045.1_ASM146704v1
Cluster 2	GCA_001467765.1	Bacteria;Pseudomonadota;Gammaproteobacteria;Legionellales;Legionellaceae;Legionella;Legionella jordanis	Legionella jordanis	491079	98.64	0.74	Environment	Scaffold	ftp://ftp.ncbi.nlm.nih.gov/genomes/all/GCA/001/467/765/GCA_001467765.1_ASM146776v1
Cluster 2	GCA_001530325.1	Bacteria;Pseudomonadota;Betaproteobacteria;Burkholderiales;Alcaligenaceae;Alcaligenes;Alcaligenes faecalis	Alcaligenes faecalis	179577	95.58	3.04	Environment	Scaffold	ftp://ftp.ncbi.nlm.nih.gov/genomes/all/GCA/001/530/325/GCA_001530325.1_ASM153032v1
Cluster 2	GCA_001559055.2	Bacteria;Pseudomonadota;Betaproteobacteria;Burkholderiales;Alcaligenaceae;Bordetella;Bordetella bronchiseptica	Bordetella bronchiseptica	5339230	98.86	0	Animal	Completed Genome	ftp://ftp.ncbi.nlm.nih.gov/genomes/all/GCA/001/559/055/GCA_001559055.2_ASM155905v2
Cluster 2	GCA_001572745.1	Bacteria;Pseudomonadota;Gammaproteobacteria;Legionellales;Coxiellaceae;Coxiella;Coxiella burnetii	Coxiella burnetii	2093477	97.04	3.58	Animal	Completed Genome	ftp://ftp.ncbi.nlm.nih.gov/genomes/all/GCA/001/572/745/GCA_001572745.1_ASM157274v1
Cluster 2	GCA_001582135.1	Bacteria;Pseudomonadota;Gammaproteobacteria;Legionellales;Legionellaceae;Legionella;Legionella pneumophila	Legionella pneumophila	168191	99.29	0.32	Human	Scaffold	ftp://ftp.ncbi.nlm.nih.gov/genomes/all/GCA/001/582/135/GCA_001582135.1_ASM158213v1
Cluster 2	GCA_001582565.1	Bacteria;Pseudomonadota;Gammaproteobacteria;Legionellales;Legionellaceae;Legionella;Legionella pneumophila	Legionella pneumophila	225663	97.19	0.3	Human	Scaffold	ftp://ftp.ncbi.nlm.nih.gov/genomes/all/GCA/001/582/565/GCA_001582565.1_ASM158256v1
Cluster 2	GCA_001582645.1	Bacteria;Pseudomonadota;Gammaproteobacteria;Legionellales;Legionellaceae;Legionella;Legionella pneumophila	Legionella pneumophila	175229	96.56	0.33	Environment	Scaffold	ftp://ftp.ncbi.nlm.nih.gov/genomes/all/GCA/001/582/645/GCA_001582645.1_ASM158264v1
Cluster 2	GCA_001592705.1	Bacteria;Pseudomonadota;Gammaproteobacteria;Legionellales;Legionellaceae;Legionella;Legionella pneumophila	Legionella pneumophila subsp. pneumophila	3573898	98.21	1.79	Human	Completed Genome	ftp://ftp.ncbi.nlm.nih.gov/genomes/all/GCA/001/592/705/GCA_001592705.1_ASM159270v1
Cluster 2	GCA_001595975.1	Bacteria;Pseudomonadota;Gammaproteobacteria;Xanthomonadales;Xanthomonadaceae;Stenotrophomonas;Stenotrophomonas maltophilia	Stenotrophomonas maltophilia	231617	99.14	0.62	Environment	Scaffold	ftp://ftp.ncbi.nlm.nih.gov/genomes/all/GCA/001/595/975/GCA_001595975.1_ASM159597v1
Cluster 2	GCA_001600895.1	Bacteria;Pseudomonadota;Gammaproteobacteria;Legionellales;Legionellaceae;Legionella;Legionella pneumophila	Legionella pneumophila	59975	98.68	0.79	Environment	Scaffold	ftp://ftp.ncbi.nlm.nih.gov/genomes/all/GCA/001/600/895/GCA_001600895.1_ASM160089v1
Cluster 2	GCA_001602215.1	Bacteria;Pseudomonadota;Alphaproteobacteria;Rickettsiales;Rickettsiaceae;Rickettsia;Rickettsia prowazekii	Rickettsia prowazekii	1111769	97.42	0.33	Animal	Completed Genome	ftp://ftp.ncbi.nlm.nih.gov/genomes/all/GCA/001/602/215/GCA_001602215.1_ASM160221v1
Cluster 2	GCA_001697105.1	Bacteria;Pseudomonadota;Betaproteobacteria;Neisseriales;Neisseriaceae;Neisseria;Neisseria meningitidis	Neisseria meningitidis	2230103	98.97	0.15	Human	Completed Genome	ftp://ftp.ncbi.nlm.nih.gov/genomes/all/GCA/001/697/105/GCA_001697105.1_ASM169710v1
Cluster 2	GCA_001697125.1	Bacteria;Pseudomonadota;Betaproteobacteria;Neisseriales;Neisseriaceae;Neisseria;Neisseria meningitidis	Neisseria meningitidis	2170619	98.85	0.39	Human	Completed Genome	ftp://ftp.ncbi.nlm.nih.gov/genomes/all/GCA/001/697/125/GCA_001697125.1_ASM169712v1
Cluster 2	GCA_001697345.1	Bacteria;Pseudomonadota;Betaproteobacteria;Neisseriales;Neisseriaceae;Neisseria;Neisseria meningitidis	Neisseria meningitidis	2173686	99.33	0.15	Human	Completed Genome	ftp://ftp.ncbi.nlm.nih.gov/genomes/all/GCA/001/697/345/GCA_001697345.1_ASM169734v1
Cluster 2	GCA_001704215.1	Bacteria;Pseudomonadota;Betaproteobacteria;Burkholderiales;Alcaligenaceae;Bordetella;Bordetella holmesii	Bordetella holmesii	3694378	97.22	2.37	Human	Completed Genome	ftp://ftp.ncbi.nlm.nih.gov/genomes/all/GCA/001/704/215/GCA_001704215.1_ASM170421v1
Cluster 2	GCA_001704355.1	Bacteria;Pseudomonadota;Betaproteobacteria;Burkholderiales;Alcaligenaceae;Bordetella;Bordetella bronchiseptica	Bordetella bronchiseptica	5077489	99.21	0.1	Human	Completed Genome	ftp://ftp.ncbi.nlm.nih.gov/genomes/all/GCA/001/704/355/GCA_001704355.1_ASM170435v1
Cluster 2	GCA_001718395.1	Bacteria;Pseudomonadota;Betaproteobacteria;Burkholderiales;Burkholderiaceae;Burkholderia;Burkholderia cepacia	Burkholderia cepacia	3728457	99.04	0.74	Environment	Completed Genome	ftp://ftp.ncbi.nlm.nih.gov/genomes/all/GCA/001/718/395/GCA_001718395.1_ASM171839v1
Cluster 2	GCA_001718495.1	Bacteria;Pseudomonadota;Betaproteobacteria;Burkholderiales;Burkholderiaceae;Burkholderia;Burkholderia vietnamiensis	Burkholderia vietnamiensis	2428798	99.57	0.53	Environment	Completed Genome	ftp://ftp.ncbi.nlm.nih.gov/genomes/all/GCA/001/718/495/GCA_001718495.1_ASM171849v1
[truncated: 2,934 more rows]
