# Supplementary material for: Comparative genomics reveals key adaptive mechanisms in pathogen host-niche specialization
Source: Front Microbiol. 2025 Jun 6;16:1543610. doi: 10.3389/fmicb.2025.1543610 (PMC12180303; doi:10.3389/fmicb.2025.1543610)
Supplement: SUPPLEMENTARY TABLE S2 — Description of COG categories. [file Table_2.xlsx]

## Sheet: Sheet1
	COG class	COG class description	COG class summary
Mobilome: prophages, transposons	X	Mobilome: prophages, transposons	Unclassified
Secondary metabolites	Q	Secondary metabolites biosynthesis, transport and catabolism	Metabolism
Nucleotides	F	Nucleotide transport and metabolism	Metabolism
Lipids	I	Lipid transport and metabolism	Metabolism
Inorganic ions	P	Inorganic ion transport and metabolism	Metabolism
Energy	C	Energy production and conversion	Metabolism
Coenzymes	H	Coenzyme transport and metabolism	Metabolism
Carbohydrates	G	Carbohydrate transport and metabolism	Metabolism
Amino acids	E	Amino acid transport and metabolism	Metabolism
Translation	J	Translation, ribosomal structure and biogenesis	Information storage and processing
Transcription	K	Transcription	Information storage and processing
RNA processing	A	RNA processing and modification	Information storage and processing
Replication, recombination and repair	L	Replication, recombination and repair	Information storage and processing
Chromatin	B	Chromatin structure and dynamics	Information storage and processing
Signal transduction	T	Signal transduction mechanisms	Cellular processes and signaling
Post-translation	O	Posttranslational modification, protein turnover, chaperones	Cellular processes and signaling
Trafficking, secretion	U	Intracellular trafficking, secretion, and vesicular transport	Cellular processes and signaling
Extracellular structures	W	Extracellular structures	Cellular processes and signaling
Defense mechanisms	V	Defense mechanisms	Cellular processes and signaling
Cytoskeleton	Z	Cytoskeleton	Cellular processes and signaling
Cell wall,cell membranes	M	Cell wall/membrane/envelope biogenesis	Cellular processes and signaling
Cell motility	N	Cell motility	Cellular processes and signaling
Cell division	D	Cell cycle control, cell division, chromosome partitioning	Cellular processes and signaling
