# Supplementary material for: Comparative genomics reveals key adaptive mechanisms in pathogen host-niche specialization
Source: Front Microbiol. 2025 Jun 6;16:1543610. doi: 10.3389/fmicb.2025.1543610 (PMC12180303; doi:10.3389/fmicb.2025.1543610)
Supplement: SUPPLEMENTARY TABLE S3 — Detection rates of virulence factor clusters across different groups. [file Table_3.xlsx]

## Sheet: vfcategory_coverage_frequency
	Cluster_1_Animal	Cluster_1_Environment	Cluster_1_Human	Cluster_2_Animal	Cluster_2_Environment	Cluster_2_Human	Cluster_3_Animal	Cluster_3_Environment	Cluster_3_Human	Cluster_4_Animal	Cluster_4_Environment	Cluster_4_Human	Cluster_5_Animal	Cluster_5_Human	Cluster_6_Animal	Cluster_6_Environment	Cluster_6_Human	Cluster_7_Animal	Cluster_7_Environment	Cluster_7_Human	Cluster_8_Animal	Cluster_8_Environment	Cluster_8_Human
Effector delivery system	0.845455	0.842657	0.717241	0.703704	0.123596	0.269231	0.0506329	0	0.806938	0.186275	0.239264	0.0841584	0.9	0.0144928	0	0	0	0.0952381	0	0.0564516	0.942675	0.752577	0.840183
Nutritional/Metabolic factor	0.533333	0.325175	0.74069	0	0.0786517	0.346154	0	0	0	0.421569	0.680982	0.158416	0	0	0.015873	0.0588235	0.407115	0.190476	0.03125	0.0967742	0.936306	0.659794	0.757991
Biofilm	0.0424242	0.230769	0.0993103	0	0.382022	0.115385	0	0	0	0.107843	0.00613497	0.0693069	0	0	0.111111	0.0588235	0.041502	0	0	0	0.942675	0.701031	0.767123
Adherence	0.793939	0.730769	0.834483	0.222222	0.337079	0.604396	0.556962	0.375	0.886878	0.323529	0.0184049	0.178218	0.2	0.00724638	0.201058	0.117647	0.434783	0.0952381	0	0.129032	0.993631	0.948454	0.96347
Regulation	0.478788	0.472028	0.73931	0.0740741	0.606742	0.21978	0	0	0	0.166667	0	0.0445545	0	0	0	0	0	0.238095	0.0625	0.137097	0	0	0
Immune modulation	0.578788	0.465035	0.783448	0.666667	0.460674	0.494505	0.594937	1	0.966817	0.294118	0.0245399	0.113861	0	0	0.174603	0.0588235	0.241107	0.0952381	0	0.0564516	0.980892	0.948454	0.972603
Exoenzyme	0.0363636	0.171329	0.0441379	0.259259	0	0	0	0	0	0.529412	0.662577	0.30198	0.2	0.00724638	0.179894	0.117647	0.294466	0	0	0	0.0828025	0.123711	0.296804
Exotoxin	0.439394	0.41958	0.202759	0.296296	0	0.0164835	0.481013	0.375	0.58371	0.568627	0.717791	0.361386	0	0	0.0899471	0	0.233202	0.0952381	0	0.0645161	0.904459	0.360825	0.707763
Motility	0.427273	0.695804	0.318621	0.0740741	0.573034	0.203297	0.936709	1	0.971342	0.0686275	0	0.0247525	0	0	0	0	0	0	0	0	0.044586	0.350515	0.0776256
Invasion	0.469697	0.346154	0.673103	0.259259	0	0.175824	0.544304	0.375	0.0558069	0.186275	0.00613497	0.0445545	0	0.00724638	0	0	0	0	0	0	0	0	0
Post-translational modification	0	0	0	0	0.0561798	0.0769231	0	0	0	0.186275	0.00613497	0.0445545	0	0	0	0	0	0	0	0.0725806	0	0	0
Others	0.0030303	0.0104895	0.00551724	0.037037	0.0786517	0.0934066	0	0	0	0	0	0	0	0	0	0	0.00197628	0.285714	0.09375	0.145161	0	0	0
Stress survival	0	0	0	0.037037	0.0786517	0.357143	0.0126582	0	0.911011	0.186275	0.00613497	0.0445545	0	0	0	0	0	0.238095	0.09375	0.112903	0	0	0
Antimicrobial activity/Competitive advantage	0.472727	0.356643	0.732414	0	0	0.252747	0	0	0	0	0	0	0	0	0	0	0	0	0	0	0	0	0
