# Supplementary material for: Comparative genomics reveals key adaptive mechanisms in pathogen host-niche specialization
Source: Front Microbiol. 2025 Jun 6;16:1543610. doi: 10.3389/fmicb.2025.1543610 (PMC12180303; doi:10.3389/fmicb.2025.1543610)
Supplement: SUPPLEMENTARY TABLE S4 — Detection rates of antibiotic resistance genes across different groups. [file Table_4.xlsx]

## Sheet: antibiotic_resistance_frequency
	Cluster_1_Animal	Cluster_1_Environment	Cluster_1_Human	Cluster_2_Animal	Cluster_2_Environment	Cluster_2_Human	Cluster_3_Animal	Cluster_3_Environment	Cluster_3_Human	Cluster_4_Animal	Cluster_4_Environment	Cluster_4_Human	Cluster_5_Animal	Cluster_5_Human	Cluster_6_Animal	Cluster_6_Environment	Cluster_6_Human	Cluster_7_Animal	Cluster_7_Environment	Cluster_7_Human	Cluster_8_Animal	Cluster_8_Environment	Cluster_8_Human
tetracycline antibiotic	0.748485	0.713287	0.813793	0.222222	0.404494	0.510989	0.291139	0	0.897436	0.303922	0.245399	0.267327	0.1	0.550725	0.603175	0.176471	0.355731	0.380952	0.03125	0.137097	0.936306	0.453608	0.776256
sulfonamide antibiotic	0.20303	0.153846	0.231724	0.037037	0.011236	0.0549451	0	0	0	0	0	0	0	0.0217391	0	0	0.00395257	0.190476	0.03125	0.0322581	0.0828025	0.0721649	0.210046
streptogramin B antibiotic	0.00606061	0	0.00413793	0	0	0	0.0506329	0	0.0015083	0.0980392	0.128834	0.0990099	0	0.304348	0.544974	0.0588235	0.179842	0.190476	0.0625	0.153226	0	0	0
streptogramin antibiotic	0.030303	0.0314685	0.0275862	0	0	0.00549451	0.0506329	0	0.0015083	0.205882	0.153374	0.222772	0	0.304348	0.560847	0.117647	0.227273	0.190476	0.0625	0.153226	0.0254777	0.0412371	0.0639269
streptogramin A antibiotic	0.0121212	0	0.00827586	0	0	0	0.0506329	0	0.0015083	0.186275	0.128834	0.168317	0	0.304348	0.534392	0.0588235	0.201581	0.142857	0.0625	0.153226	0	0	0
salicylic acid antibiotic	0	0	0	0	0	0	0	0	0	0	0	0	0	0	0	0	0	0.047619	0	0.00806452	0	0	0
rifamycin antibiotic	0.487879	0.496503	0.754483	0	0	0	0.0126582	0	0.337858	0	0	0	0	0	0.216931	0.470588	0.112648	0	0.09375	0.322581	0.917197	0.42268	0.748858
pleuromutilin antibiotic	0.00606061	0	0	0	0	0	0	0	0	0.186275	0.110429	0.0742574	0	0	0.195767	0.176471	0.0711462	0	0	0	0	0	0
phosphonic acid antibiotic	0.475758	0.444056	0.695172	0	0	0	0	0	0	0.401961	0.668712	0.138614	0.2	0.00724638	0.00529101	0	0	0.0952381	0.03125	0.0725806	0.732484	0.237113	0.438356
phenicol antibiotic	0.884848	0.982517	0.891034	0.222222	0.235955	0.395604	0.0759494	0	0.0015083	0.22549	0.171779	0.108911	0	0	0.0793651	0	0.0316206	0.047619	0.03125	0.0483871	0.987261	0.824742	0.96347
peptide antibiotic	0.524242	0.674825	0.833103	0.037037	0	0	0	0	0	0.490196	0.159509	0.257426	0	0.101449	0.010582	0	0.00197628	0	0	0	0.904459	0.360825	0.712329
penem	0.49697	0.496503	0.776552	0	0.0224719	0.0274725	0	0	0.00603318	0.107843	0.619632	0.0445545	0	0.00724638	0	0	0.00197628	0.0952381	0	0.0322581	0.929936	0.371134	0.776256
penam	0.984848	0.993007	0.942069	0.148148	0.247191	0.626374	0.481013	0.25	0.948718	0.284314	0.509202	0.212871	0	0.0362319	0.015873	0	0.0355731	0.142857	0.0625	0.0967742	0.968153	0.494845	0.785388
oxazolidinone antibiotic	0.00606061	0	0	0	0	0	0	0	0	0.127451	0.0306748	0.0990099	0	0	0.015873	0	0.00197628	0	0	0	0.00636943	0.0103093	0.0273973
nucleoside antibiotic	0.469697	0.325175	0.653793	0	0	0	0.0253165	0	0.00301659	0.0882353	0.134969	0.0445545	0	0	0.0634921	0	0.00592885	0	0	0	0.00636943	0	0.00456621
nitroimidazole antibiotic	0.481818	0.48951	0.754483	0	0	0	0.0126582	0	0.895928	0.00980392	0.00613497	0.0445545	0	0.0507246	0	0	0	0	0	0	0	0	0
nitrofuran antibiotic	0.109091	0.160839	0.38069	0	0	0	0	0	0	0	0	0	0	0	0	0	0	0	0	0	0	0	0
mupirocin-like antibiotic	0	0	0	0	0	0	0	0	0	0	0	0.00990099	0	0	0	0	0	0	0	0	0	0	0
monobactam	0.481818	0.363636	0.684138	0	0.0224719	0.021978	0	0	0.00603318	0	0.00613497	0.00990099	0	0	0	0	0.00197628	0	0	0	0.0573248	0.0412371	0.114155
macrolide antibiotic	0.781818	0.874126	0.845517	0.222222	0.651685	0.730769	0.531646	0.375	0.965309	0.254902	0.239264	0.19802	0.2	0.413043	0.698413	0.470588	0.432806	0.238095	0.0625	0.177419	0.949045	0.402062	0.757991
lincosamide antibiotic	0.348485	0.132867	0.213793	0	0	0	0.0759494	0	0.0015083	0.382353	0.165644	0.287129	0	0.405797	0.555556	0.294118	0.395257	0.190476	0.0625	0.153226	0.898089	0.350515	0.707763
isoniazid-like antibiotic	0.00909091	0.0034965	0.00689655	0	0	0	0	0	0	0	0	0	0	0	0	0	0	0	0	0.00806452	0	0	0
glycylcycline	0.469697	0.342657	0.664828	0	0	0	0	0	0	0.107843	0.00613497	0.0693069	0	0.0724638	0	0	0	0	0	0	0.866242	0.298969	0.479452
glycopeptide antibiotic	0.0181818	0.00699301	0.0137931	0	0	0.00549451	0	0	0	0.0294118	0.159509	0	0	0	0.0740741	0.294118	0.0434783	0	0	0	0.0127389	0.0103093	0.0365297
fusidane antibiotic	0	0	0	0	0	0	0.481013	0.375	0.0542986	0.0490196	0.00613497	0.019802	0	0	0	0	0	0	0	0	0	0	0
fluoroquinolone antibiotic	0.9	0.996503	0.982069	0.222222	0.786517	0.549451	0.759494	0.375	0.960784	0.362745	0.147239	0.306931	0	0	0.243386	0.529412	0.55336	0.047619	0	0.016129	0.993631	0.85567	0.990868
elfamycin antibiotic	0.412121	0.465035	0.648276	0	0	0	0	0	0	0	0	0	0	0	0	0	0	0	0	0	0	0	0
disinfecting agents and antiseptics	0.515152	0.531469	0.848276	0.037037	0.011236	0.0164835	0	0	0	0.235294	0.134969	0.193069	0	0	0.126984	0.0588235	0.0434783	0.190476	0.03125	0.00806452	0.910828	0.443299	0.73516
diaminopyrimidine antibiotic	0.884848	0.982517	0.889655	0	0	0	0	0	0	0.147059	0.0306748	0.0940594	0	0	0.121693	0.117647	0.0474308	0	0	0	0.968153	0.783505	0.954338
cephamycin	0.575758	0.405594	0.726897	0.148148	0.224719	0.401099	0.0126582	0	0.907994	0	0	0	0	0.224638	0	0	0.027668	0	0.03125	0.0241935	0.0509554	0.0515464	0.100457
cephalosporin	0.660606	0.618881	0.855172	0.148148	0.224719	0.456044	0.493671	0.375	0.962293	0.264706	0.699387	0.158416	0	0.195652	0.111111	0.0588235	0.0711462	0.0952381	0.03125	0.0483871	0.955414	0.43299	0.776256
carbapenem	0.612121	0.688811	0.842759	0	0	0.0604396	0	0	0	0.0490196	0.0368098	0.0247525	0	0.0942029	0	0	0	0	0	0	0.974522	0.494845	0.853881
bicyclomycin-like antibiotic	0	0	0	0	0	0	0	0	0	0	0	0	0	0	0	0	0	0	0	0	0.00636943	0.0103093	0.0273973
antibacterial free fatty acids	0	0	0	0	0	0.181319	0	0	0	0	0	0	0	0	0	0	0	0	0	0	0	0	0
aminoglycoside antibiotic	0.527273	0.559441	0.791724	0.222222	0.640449	0.554945	0.265823	0	0.00452489	0.22549	0.122699	0.153465	0	0.0507246	0.380952	0.117647	0.0652174	0.238095	0.09375	0.145161	0.866242	0.43299	0.684932
aminocoumarin antibiotic	0.466667	0.318182	0.649655	0	0	0	0	0	0	0	0	0	0	0	0	0	0	0	0	0	0.904459	0.360825	0.69863
