# Supplementary material for: Comparative genomics reveals key adaptive mechanisms in pathogen host-niche specialization
Source: Front Microbiol. 2025 Jun 6;16:1543610. doi: 10.3389/fmicb.2025.1543610 (PMC12180303; doi:10.3389/fmicb.2025.1543610)
Supplement: SUPPLEMENTARY TABLE S5 — List of host niches adaptation-associated signature genes identified by different methods. [file Table_5.xlsx]

## Sheet: human vs animal
Cluster	Label	Gene_symbol	LASSO	MeanDecreaseAccuracy	MeanDecreaseGini	genes	Odds_ratio	Benjamini_H_p	Gene_description	Class_description	Class_summary
1	Animal	NDM-5	-2.30064	4.85171	0.600818	3000467	0.0555939	0.00345822	NDM beta-lactamase	carbapenem; cephalosporin; cephamycin; penam	antibiotic inactivation
1	Animal	ACT-62	-1.92248	4.06849	0.81597	3006257	0.167244	0.0279089	ACT beta-lactamase	carbapenem; cephalosporin; cephamycin; penam	antibiotic inactivation
1	Animal	APH(4)-Ia	-1.84534	4.71303	0.43965	3002655	0.0400552	0.00018565	APH(4)	aminoglycoside antibiotic	antibiotic inactivation
1	Animal	DR0291	-0.350397	4.24111	1.29394	COG1579	0.176296	3.47193e-20	Predicted nucleic acid-binding protein DR0291, contains C4-type Zn-ribbon domain	General function prediction only	Poorly characterized
1	Animal	HlyC	-0.347404	4.62435	1.13905	COG2994	0.669528	0.0380659	ACP:hemolysin acyltransferase (hemolysin-activating protein)	Posttranslational modification, protein turnover, chaperones	Cellular processes and signaling
1	Animal	nan	-0.320734	3.5062	0.494721	COG3656	0.0977952	2.88905e-23	Predicted periplasmic protein	Function unknown	Poorly characterized
1	Animal	CodB	-0.293874	4.34501	0.324963	COG1457	0.301338	1.04554e-13	Purine-cytosine permease or related protein	Nucleotide transport and metabolism	Metabolism
1	Animal	LemA	-0.148852	3.80309	1.05704	COG1704	0.180585	6.65162e-32	Magnetosome formation protein MamQ, lipoprotein antigen LemA family	Cell wall/membrane/envelope biogenesis	Cellular processes and signaling
1	Animal	MauG	-0.121828	3.74854	1.73555	COG1858	0.139825	9.39978e-38	Cytochrome c peroxidase	Posttranslational modification, protein turnover, chaperones	Cellular processes and signaling
1	Animal	RfaL	-0.0500544	3.46294	0.880565	COG3307	0.40261	1.69156e-06	O-antigen ligase	Cell wall/membrane/envelope biogenesis	Cellular processes and signaling
2	Animal	nan	-2.15068	4.25027	0.365857	COG5462	0	1.00617e-12	Predicted secreted (periplasmic) protein	Function unknown	Poorly characterized
4	Animal	YpfH	-0.532763	4.94708	0.790873	COG0400	0.118089	3.22607e-13	Predicted esterase	General function prediction only	Poorly characterized
4	Animal	EntE	-1.36015	5.21749	0.413149	COG1021	0.143627	6.75379e-06	EntE, 2,3-dihydroxybenzoate-AMP synthase component of non-ribosomal peptide synthetase	Secondary metabolites biosynthesis, transport and catabolism	Metabolism
4	Animal	LdcB	-0.0366386	3.13895	0.370733	COG1876	0.1921	2.76686e-08	LD-carboxypeptidase LdcB, LAS superfamily	Cell wall/membrane/envelope biogenesis	Cellular processes and signaling
4	Animal	NirD	-0.73351	3.38133	0.137964	COG2146	0.250622	2.13101e-06	Ferredoxin subunit of nitrite reductase or a ring-hydroxylating dioxygenase	Inorganic ion transport and metabolism|Secondary metabolites biosynthesis, transport and catabolism	Metabolism
4	Animal	GrsT	-0.438145	4.63629	0.448123	COG3208	0.217676	0.000103988	Surfactin synthase thioesterase subunit	Secondary metabolites biosynthesis, transport and catabolism	Metabolism
4	Animal	IolD	-0.71025	4.00647	0.251461	COG3962	0.237715	1.72406e-06	TPP-dependent trihydroxycyclohexane-1,2-dione (THcHDO) dehydratase, myo-inositol metabolism	Carbohydrate transport and metabolism	Metabolism
7	Animal	LemA	-0.424077	3.68894	0.190497	COG1704	0.178006	0.0204419	Magnetosome formation protein MamQ, lipoprotein antigen LemA family	Cell wall/membrane/envelope biogenesis	Cellular processes and signaling
8	Animal	adeS	-0.786018	10.5082	2.32139	3000549	0.110382	1.48017e-18	resistance-nodulation-cell division (RND) antibiotic efflux pump	glycylcycline; tetracycline antibiotic	antibiotic efflux
8	Animal	YifB	-0.500181	4.19653	0.823106	COG0606	0.178504	7.58904e-07	Predicted Mg-chelatase, contains ChlI-like and ATPase domains, YifB family	Posttranslational modification, protein turnover, chaperones	Cellular processes and signaling
8	Animal	ComEB	-0.0865442	5.78134	1.55167	COG2131	0.127846	6.75387e-16	Deoxycytidylate deaminase	Nucleotide transport and metabolism	Metabolism
8	Animal	CynX	-0.253669	5.1984	0.73791	COG2807	0.0747647	2.73439e-12	Cyanate permease	Inorganic ion transport and metabolism	Metabolism
8	Animal	nan	-0.25325	6.08958	1.0248	COG3517	0.0871622	3.7767e-13	Predicted component TssB of the type VI protein secretion system, VipA/VipB/TssB family	Intracellular trafficking, secretion, and vesicular transport	Cellular processes and signaling
1	Human	HypB	0.49584	6.17599	0.918681	COG0378	4.25266	1.90511e-17	Hydrogenase/urease maturation factor HypB, Ni2+-binding GTPase	Posttranslational modification, protein turnover, chaperones	Cellular processes and signaling
1	Human	YpfH	0.383973	5.9236	0.791956	COG0400	3.28685	9.05517e-14	Predicted esterase	General function prediction only	Poorly characterized
1	Human	WecC	0.0124403	4.27214	0.455423	COG0677	2.2907	3.32624e-07	UDP-N-acetyl-D-mannosaminuronate dehydrogenase	Cell wall/membrane/envelope biogenesis	Cellular processes and signaling
1	Human	UreH	0.326475	4.84498	1.31379	COG0829	6.80386	1.06566e-34	Urease accessory protein UreH	Posttranslational modification, protein turnover, chaperones	Cellular processes and signaling
1	Human	nan	1.29699	3.60436	0.181655	COG1233	9.33333	0.0169296	Phytoene dehydrogenase-related protein	Secondary metabolites biosynthesis, transport and catabolism	Metabolism
1	Human	FhaC	-0.222652	5.07824	1.26389	COG2831	1.593	0.00154015	Hemolysin activation/secretion protein	Intracellular trafficking, secretion, and vesicular transport	Cellular processes and signaling
1	Human	FecR	0.210157	3.91382	0.882212	COG3712	5.12959	7.93437e-16	Periplasmic ferric-dicitrate binding protein FecR, regulates iron transport	Inorganic ion transport and metabolism|Signal transduction mechanisms	Cellular processes and signaling|Metabolism
1	Human	RhuM	0.0645262	3.47864	0.601635	COG3943	2.91356	1.77114e-08	Uncharacterized protein RhuM, Salmonella virulence factor	Function unknown	Poorly characterized
1	Human	GH18	0.27073	4.81562	0.688949	GH18	1.75598	0.000277069	Glycoside hydrolase family 18	Glycoside hydrolase
1	Human	ShET2	1.18781	4.08681	0.367724	VF0258	inf	0.000830572	Shigella enterotoxin 2	Exotoxin
2	Human	ClcA	0.565728	3.30551	0.306057	COG0038	50	2.95257e-12	H+/Cl- antiporter ClcA	Inorganic ion transport and metabolism	Metabolism
2	Human	ArgG	8.65e-15	3.23408	0.286732	COG0137	55.625	6.18472e-11	Argininosuccinate synthase	Amino acid transport and metabolism	Metabolism
2	Human	ArgH	0.558881	2.44984	0.241591	COG0165	51.4909	2.21378e-11	Argininosuccinate lyase	Amino acid transport and metabolism	Metabolism
2	Human	YhbY	7.16e-15	2.98031	0.281674	COG1534	70.8	1.00617e-12	RNA-binding protein YhbY	Translation, ribosomal structure and biogenesis	Information storage and processing
2	Human	YjgA	1.02998	3.04524	0.495878	COG3028	89	1.00617e-12	Ribosomal 50S subunit-associated protein YjgA, DUF615 family	Translation, ribosomal structure and biogenesis	Information storage and processing
4	Human	PurM	2.0887	3.35076	0.271873	COG0150	10.553	0.000162109	Phosphoribosylaminoimidazole (AIR) synthetase	Nucleotide transport and metabolism	Metabolism
4	Human	HypB	0.193931	3.96964	0.480415	COG0378	4.60526	6.38058e-08	Hydrogenase/urease maturation factor HypB, Ni2+-binding GTPase	Posttranslational modification, protein turnover, chaperones	Cellular processes and signaling
4	Human	FTR1	0.863832	3.37377	0.417324	COG0672	2.1236	0.0142013	High-affinity Fe2+/Pb2+ permease	Inorganic ion transport and metabolism	Metabolism
4	Human	PilT	0.113678	3.05543	0.393434	COG2805	4.34667	4.0101e-07	Type IV pilus assembly protein PilT, pilus retraction ATPase	Cell motility|Extracellular structures	Cellular processes and signaling
4	Human	FucU	0.0136828	3.56013	0.167605	COG4154	2.65004	0.0420508	L-fucose mutarotase/ribose pyranase, RbsD/FucU family	Carbohydrate transport and metabolism	Metabolism
4	Human	nan	0.875126	3.9291	0.229648	COG5263	2.56857	0.00652039	Glucan-binding domain (YG repeat)	Carbohydrate transport and metabolism	Metabolism
8	Human	ANT(2'')-Ia	0.411684	4.68033	0.432389	3000230	inf	0.0106655	ANT(2'')	aminoglycoside antibiotic	antibiotic inactivation
8	Human	Acinetobacter baumannii gyrA conferring resistance to fluoroquinolones	0.87296	6.8844	0.932695	3003817	7.21875	0.00333887	fluoroquinolone resistant gyrA	fluoroquinolone antibiotic	antibiotic target alteration
8	Human	YqdH	0.120163	5.84149	1.10894	COG1979	16.1566	1.07782e-12	Alcohol dehydrogenase YqhD, Fe-dependent ADH family	Energy production and conversion	Metabolism
8	Human	STE14	0.152594	6.68637	1.49608	COG2020	7.25269	1.68199e-11	Protein-S-isoprenylcysteine O-methyltransferase Ste14	Posttranslational modification, protein turnover, chaperones	Cellular processes and signaling
8	Human	Srp102	0.511896	5.54494	1.04929	COG2229	10.0638	1.14704e-12	Signal recognition particle receptor subunit beta, a GTPase	Intracellular trafficking, secretion, and vesicular transport	Cellular processes and signaling
8	Human	CopC	0.448964	9.39628	2.71452	COG2372	10.6916	6.75387e-16	Copper-binding protein CopC (methionine-rich)	Inorganic ion transport and metabolism	Metabolism
8	Human	Csa3	0.337111	4.43792	0.405578	COG3415	4.31122	1.359e-05	CRISPR-associated protein Csa3, CARF domain	Defense mechanisms	Cellular processes and signaling
8	Human	nan	0.641432	8.78432	1.3245	COG3514	10.8562	1.10584e-09	Uncharacterized conserved protein, DUF4415 family	Function unknown	Poorly characterized
8	Human	nan	0.0855878	3.58199	0.51997	COG3752	4.48263	1.06014e-08	Steroid 5-alpha reductase family enzyme	General function prediction only	Poorly characterized

## Sheet: human vs environment
Cluster	Label		genes	Odds_ratio	Benjamini_H_p	Gene_description	Class_description	Class_summary
4	Environment	BcIII	3007101	0	5.04237e-31	class A Bacillus cereus Bc beta-lactamase	cephalosporin; penem	antibiotic inactivation
4	Environment	AA1	AA1	0.0160792	5.73441e-52		Auxiliary Activities
1	Environment	AA12	AA12	0.245527	3.42673e-06		Auxiliary Activities
2	Environment	AA2	AA2	0.150772	2.92489e-10		Auxiliary Activities
4	Environment	CE14	CE14	0.043753	1.48178e-27		Carbohydrate Esterases
2	Environment	CE9	CE9	0.157424	1.87134e-07		Carbohydrate Esterases
7	Environment	AlkA	COG0122	0.0664479	1.14063e-08	3-methyladenine DNA glycosylase/8-oxoguanine DNA glycosylase	Replication, recombination and repair	Information storage and processing
8	Environment	YifB	COG0606	0.366667	0.00596005	Predicted Mg-chelatase, contains ChlI-like and ATPase domains, YifB family	Posttranslational modification, protein turnover, chaperones	Cellular processes and signaling
1	Environment	MnhC	COG1006	0.0529301	1.9256e-27	Multisubunit Na+/H+ antiporter, MnhC subunit	Inorganic ion transport and metabolism	Metabolism
7	Environment	YobN	COG1231	0.0272727	2.49439e-10	Monoamine oxidase	Amino acid transport and metabolism	Metabolism
1	Environment	YfmG	COG1262	0.157943	2.6314e-32	Formylglycine-generating enzyme, required for sulfatase activity, contains SUMF1/FGE domain	Posttranslational modification, protein turnover, chaperones	Cellular processes and signaling
1	Environment	nan	COG1342	0.174427	5.829e-27	Predicted DNA-binding protein, UPF0251 family	General function prediction only	Poorly characterized
1	Environment	NifX	COG1433	0.161925	4.14924e-30	Predicted Fe-Mo cluster-binding protein, NifX family	Posttranslational modification, protein turnover, chaperones	Cellular processes and signaling
1	Environment	MlaD	COG1463	0.339721	1.90844e-05	Periplasmic subunit MlaD of the ABC-type intermembrane phospholipid transporter Mla	Cell wall/membrane/envelope biogenesis	Cellular processes and signaling
4	Environment	FliE	COG1677	0.0260169	5.61488e-45	Flagellar hook-basal body complex protein FliE	Cell motility	Cellular processes and signaling
4	Environment	RssA	COG1752	0.0122482	1.26368e-53	Predicted acylesterase/phospholipase RssA, containd patatin domain	General function prediction only	Poorly characterized
2	Environment	Sbm	COG1884	0.0438272	3.53354e-07	Methylmalonyl-CoA mutase, N-terminal domain/subunit	Lipid transport and metabolism	Metabolism
7	Environment	GLY1	COG2008	0	8.36393e-18	Threonine aldolase	Amino acid transport and metabolism	Metabolism
8	Environment	LigW	COG2159	0.213353	0.00546891	5-carboxyvanillate decarboxylase LigW (lignin degradation), amidohydro domain	Carbohydrate transport and metabolism	Metabolism
4	Environment	SunT	COG2274	0.285516	4.42692e-07	ABC-type bacteriocin/lantibiotic exporters, contain an N-terminal double-glycine peptidase domain	Defense mechanisms	Cellular processes and signaling
4	Environment	YeiB	COG2311	0.0103252	1.21605e-59	Uncharacterized membrane protein YeiB	Function unknown	Poorly characterized
4	Environment	HmoA	COG2329	0.00755208	1.75532e-47	Heme-degrading monooxygenase HmoA and related ABM domain proteins	Coenzyme transport and metabolism	Metabolism
8	Environment	YjbI	COG2346	0.196424	0.000265297	Truncated hemoglobin YjbI	Inorganic ion transport and metabolism	Metabolism
4	Environment	CsgD	COG2771	0.0119608	1.15467e-57	DNA-binding transcriptional regulator, CsgD family	Transcription	Information storage and processing
2	Environment	Tra5	COG2801	0.402082	0.0111029	Transposase InsO and inactivated derivatives	Mobilome: prophages, transposons	nan
1	Environment	CytC553	COG2863	0.120087	2.14302e-42	Cytochrome c553	Energy production and conversion	Metabolism
7	Environment	YbdD	COG2879	0.0566038	1.85018e-09	Uncharacterized short protein YbdD, DUF466 family	Function unknown	Poorly characterized
8	Environment	nan	COG3046	0.334091	0.000108323	Uncharacterized conserved protein related to deoxyribodipyrimidine photolyase	General function prediction only	Poorly characterized
1	Environment	nan	COG3146	0.036823	6.77212e-13	Predicted N-acyltransferase	General function prediction only	Poorly characterized
7	Environment	TctC	COG3181	0.0196592	7.10845e-14	Tripartite-type tricarboxylate transporter, extracytoplasmic receptor component TctC	Energy production and conversion	Metabolism
7	Environment	AcoR	COG3284	0.070028	1.7984e-05	Transcriptional regulator DhaR of acetoin/glycerol metabolism	Transcription	Information storage and processing
8	Environment	AcoR	COG3284	0.16227	3.64597e-08	Transcriptional regulator DhaR of acetoin/glycerol metabolism	Transcription	Information storage and processing
1	Environment	nan	COG3367	0.105628	1.23447e-25	Uncharacterized conserved protein, NAD-dependent epimerase/dehydratase family	General function prediction only	Poorly characterized
1	Environment	SGA1	COG3387	0.120697	1.2819e-10	Glucoamylase (glucan-1,4-alpha-glucosidase), GH15 family	Carbohydrate transport and metabolism	Metabolism
1	Environment	NosD	COG3420	0.0537443	3.24736e-06	Nitrous oxide reductase accessory protein NosD, contains tandem CASH domains	Inorganic ion transport and metabolism	Metabolism
8	Environment	nan	COG3450	0.283898	2.99579e-06	Predicted enzyme of the cupin superfamily	General function prediction only	Poorly characterized
1	Environment	nan	COG3608	0.171378	2.68959e-29	Predicted deacylase	General function prediction only	Poorly characterized
2	Environment	ParD	COG3609	0.343434	0.000279968	Transcriptional regulator, contains Arc/MetJ-type RHH (ribbon-helix-helix) DNA-binding domain	Transcription	Information storage and processing
2	Environment	YaaN	COG3853	0.350529	0.00111923	Uncharacterized conserved protein YaaN involved in tellurite resistance	Defense mechanisms	Cellular processes and signaling
8	Environment	Tim44	COG4395	0.285714	0.0186958	Predicted lipid-binding transport protein, Tim44 family	Lipid transport and metabolism	Metabolism
7	Environment	CitB	COG4565	0.0198939	2.37488e-13	DNA-binding response regulator DpiB of citrate/malate metabolism	Signal transduction mechanisms|Transcription	Cellular processes and signaling|Information storage and processing
1	Environment	XdhA	COG4630	0.0774833	4.70853e-13	Xanthine dehydrogenase, Fe-S cluster and FAD-binding subunit XdhA	Nucleotide transport and metabolism	Metabolism
1	Environment	XdhB	COG4631	0.0774833	4.70853e-13	Xanthine dehydrogenase, molybdopterin-binding subunit XdhB	Nucleotide transport and metabolism	Metabolism
8	Environment	FcbT2	COG4665	0	0.00259222	TRAP-type mannitol/chloroaromatic compound transport system, small permease component	Secondary metabolites biosynthesis, transport and catabolism	Metabolism
8	Environment	MdpB	COG4675	0.0399083	0.000183376	Phage tail collar domain	Mobilome: prophages, transposons	nan
7	Environment	nan	COG4748	0.0682261	1.41854e-07	Uncharacterized conserved protein, contains restriction enzyme R protein N terminal (HSDR_N) domain	Function unknown	Poorly characterized
4	Environment	TadD	COG5010	0.256249	4.34619e-06	Flp pilus assembly protein TadD, contains TPR repeats	Extracellular structures|Intracellular trafficking, secretion, and vesicular transport	Cellular processes and signaling
7	Environment	AtpZ	COG5336	0.027195	6.15831e-12	FoF1-type ATP synthase AtpZ/Atp1/AtpQ subunit, putative Ca2+/Mg2+ transporter	Energy production and conversion	Metabolism
4	Environment	nan	COG5395	0.0163655	2.45166e-13	Uncharacterized membrane protein	Function unknown	Poorly characterized
4	Environment	nan	COG5518	0.00583748	8.79353e-30	Phage capsid portal protein XkdE	Mobilome: prophages, transposons	nan
8	Environment	BcsL	COG5653	0.0232225	2.55054e-07	Acetyltransferase involved in cellulose biosynthesis, CelD/BcsL family	Cell motility	Cellular processes and signaling
7	Environment	GH184	GH184	0.163636	0.0014835		Glycoside Hydrolases
2	Environment	GH28	GH28	0.0748387	1.23923e-09		Glycoside Hydrolases
2	Environment	GH33	GH33	0.136466	6.01368e-09		Glycoside Hydrolases
2	Environment	GH42	GH42	0.0826399	1.01175e-11		Glycoside Hydrolases
8	Environment	GH74	GH74	0.0906307	6.36369e-06		Glycoside Hydrolases
1	Environment	GT32	GT32	0.221195	1.46124e-16		Glycosyltransferases
1	Environment	ChxA	VF0614	0.0138122	4.28696e-13		Cholix toxin
2	Human	smeC	3003053	5.21212	0.0272664	resistance-nodulation-cell division (RND) antibiotic efflux pump	aminoglycoside antibiotic; cephalosporin; cephamycin; penam	antibiotic efflux
8	Human	Acinetobacter baumannii gyrA conferring resistance to fluoroquinolones	3003817	inf	0.00127421	fluoroquinolone resistant gyrA	fluoroquinolone antibiotic	antibiotic target alteration
1	Human	AA1	AA1	5.44295	1.364e-22		Auxiliary Activities
2	Human	RpsL	COG0048	inf	3.87468e-05	Ribosomal protein S12	Translation, ribosomal structure and biogenesis	Information storage and processing
8	Human	TufA	COG0050	2.9305	0.00461433	Translation elongation factor EF-Tu, a GTPase	Translation, ribosomal structure and biogenesis	Information storage and processing
8	Human	RpsJ	COG0051	inf	0.00259222	Ribosomal protein S10	Translation, ribosomal structure and biogenesis	Information storage and processing
2	Human	DnaB	COG0305	inf	1.43318e-06	Replicative DNA helicase	Replication, recombination and repair	Information storage and processing
1	Human	HypB	COG0378	7.20856	1.24981e-31	Hydrogenase/urease maturation factor HypB, Ni2+-binding GTPase	Posttranslational modification, protein turnover, chaperones	Cellular processes and signaling
8	Human	HsdS	COG0732	2.72321	0.000323694	Restriction endonuclease S subunit	Defense mechanisms	Cellular processes and signaling
4	Human	MMPL	COG1033	3.22719	0.00035427	Predicted exporter protein, RND superfamily	General function prediction only	Poorly characterized
7	Human	DppF	COG1124	3.20606	0.0266011	ABC-type dipeptide/oligopeptide/nickel transport system, ATPase component	Amino acid transport and metabolism|Inorganic ion transport and metabolism	Metabolism
8	Human	LldD	COG1304	2.95059	0.0462631	FMN-dependent dehydrogenase, includes L-lactate dehydrogenase and type II isopentenyl diphosphate isomerase	Energy production and conversion|General function prediction only|Lipid transport and metabolism	Metabolism|Poorly characterized
1	Human	QueH	COG1636	2.99116	1.81346e-12	Epoxyqueuosine reductase QueH (tRNA modification)	Translation, ribosomal structure and biogenesis	Information storage and processing
8	Human	YIH1	COG1739	inf	0.0255466	Putative translation regulator, IMPACT (imprinted ancient) protein family	General function prediction only	Poorly characterized
8	Human	PhoA	COG1785	5.0375	0.00219156	Alkaline phosphatase	General function prediction only|Inorganic ion transport and metabolism	Metabolism|Poorly characterized
8	Human	MngR	COG2188	5.01176	0.00444319	DNA-binding transcriptional regulator, GntR family	Transcription	Information storage and processing
4	Human	YedE	COG2391	3.83704	0.000374884	Uncharacterized membrane protein YedE/YeeE, contains two sulfur transport domains	General function prediction only	Poorly characterized
4	Human	FucI	COG2407	12.7304	9.08234e-10	L-fucose isomerase or related protein	Carbohydrate transport and metabolism	Metabolism
1	Human	YbbA	COG2819	1.57743	0.0120456	Predicted hydrolase of the alpha/beta superfamily	General function prediction only	Poorly characterized
4	Human	YbaN	COG2832	165.879	7.92003e-45	Uncharacterized membrane protein YbaN, DUF454 family	Function unknown	Poorly characterized
8	Human	YcjD	COG2852	2.79261	0.000207038	Very-short-patch-repair endonuclease	Replication, recombination and repair	Information storage and processing
8	Human	ImmA	COG2856	1.92334	0.0362932	Zn-dependent peptidase ImmA, M78 family	Posttranslational modification, protein turnover, chaperones	Cellular processes and signaling
1	Human	NanE	COG3010	8.40164	3.35376e-40	Putative N-acetylmannosamine-6-phosphate epimerase	Carbohydrate transport and metabolism	Metabolism
8	Human	Rve	COG3316	3.33665	0.000195628	Transposase (or an inactivated derivative), DDE domain	Mobilome: prophages, transposons	nan
1	Human	TrmR	COG4122	1.49894	0.0101903	tRNA 5-hydroxyU34 O-methylase TrmR/YrrM	Translation, ribosomal structure and biogenesis	Information storage and processing
2	Human	Vgb	COG4257	2.90557	0.0028095	Streptogramin lyase	Defense mechanisms	Cellular processes and signaling
8	Human	nan	COG4304	7.83245	0.00198006	Uncharacterized conserved protein, DUF2247 domain	Function unknown	Poorly characterized
2	Human	nan	COG4688	5.67391	0.0250428	Uncharacterized conserved protein	Function unknown	Poorly characterized
1	Human	Yersiniabactin	VF0136	14.936	7.27349e-08		Yersiniabactin
